# Supplementary material for: A network meta-analysis of efficacy, acceptability, and tolerability of antipsychotics in treatment-resistant schizophrenia
Source: PubMed Central journal article supplement (PMC11127860; doi:10.1007/s00406-023-01654-2), 2023-08-01
Supplement: 406_2023_1654_MOESM1_ESM.pdf [file 406_2023_1654_MOESM1_ESM.pdf]

# APPENDIX

## Appendix

|                                                                                                   |     |
|---------------------------------------------------------------------------------------------------|-----|
| 1 PRISMA checklist .....                                                                          | 1   |
| 2 Protocol .....                                                                                  | 4   |
| 3 Search strategy .....                                                                           | 9   |
| 4 Flow chart .....                                                                                | 12  |
| 5 Characteristics and references of included studies.....                                         | 13  |
| 5.1 Characteristics and references of specific studies with usable data.....                      | 13  |
| 5.2 Characteristics and references of specific studies without usable data .....                  | 20  |
| 6 Transitivity assessment .....                                                                   | 22  |
| 6.1 Baseline severity.....                                                                        | 22  |
| 6.2 Blinding of outcome assessor.....                                                             | 23  |
| 6.3 Treatment-resistance definition.....                                                          | 24  |
| 6.4 Publication year.....                                                                         | 25  |
| 6.5 Sample size .....                                                                             | 25  |
| 6.6 Mean age.....                                                                                 | 26  |
| 6.7 Study duration.....                                                                           | 26  |
| 7 Forest plots of pairwise meta-analyses of the primary outcome .....                             | 27  |
| 7.1 Pairwise meta-analysis of all antipsychotics .....                                            | 27  |
| 7.2 Post-hoc pairwise meta-analysis of first-generation antipsychotics (FGAs) vs. clozapine.....  | 29  |
| 7.3 Post-hoc pairwise meta-analysis of second-generation antipsychotics (SGAs) vs. clozapine..... | 30  |
| 8 Results of the network meta-analyses of the secondary outcomes .....                            | 31  |
| 8.1 Positive symptoms .....                                                                       | 32  |
| 8.2 Negative symptoms.....                                                                        | 37  |
| 8.3 Response .....                                                                                | 42  |
| 8.4 Discontinuation due to any reason .....                                                       | 53  |
| 8.5 Discontinuation due to inefficacy.....                                                        | 61  |
| 8.6 Discontinuation due to adverse events.....                                                    | 69  |
| 8.7 Use of antiparkinsonian medication .....                                                      | 77  |
| 8.8 Prolactin levels .....                                                                        | 84  |
| 8.9 Sedation.....                                                                                 | 88  |
| 8.10 Weight gain .....                                                                            | 95  |
| 8.11 QTc prolongation.....                                                                        | 100 |

|                                                                                                                   |            |
|-------------------------------------------------------------------------------------------------------------------|------------|
| 8.12 Functioning.....                                                                                             | 101        |
| 8.13 Quality of life.....                                                                                         | 105        |
| 9 Evaluation of heterogeneity.....                                                                                | 106        |
| 10 Evaluation of inconsistency.....                                                                               | 107        |
| 11 Results of the sensitivity analyses of the primary outcome.....                                                | 108        |
| 11.1 Excluding 3 old clozapine-chlorpromazine studies .....                                                       | 108        |
| 11.2 Excluding studies that included intolerant patients.....                                                     | 111        |
| 11.3 Double-blind studies only.....                                                                               | 114        |
| 11.4 Excluding studies that presented only completer analyses .....                                               | 117        |
| 11.5 Excluding studies that did not use operationalized criteria to diagnose schizophrenia .....                  | 120        |
| 11.6 Excluding studies at high risk of bias.....                                                                  | 123        |
| 11.7 Excluding studies that only included children and/or adolescents.....                                        | 126        |
| 11.8 Excluding low clozapine doses (<400 mg) .....                                                                | 129        |
| 11.9 Excluding studies from clozapine’s manufacturer .....                                                        | 132        |
| 11.10 Excluding studies from olanzapine’s manufacturer .....                                                      | 135        |
| 11.11 Excluding off-label dose olanzapine (>20mg/d).....                                                          | 138        |
| 11.12 A most extreme sensitivity analysis including only situations in which clozapine may be most superior ..... | 141        |
| 12 Results of the subgroup analyses of the primary outcome.....                                                   | 144        |
| 12.1 The criteria of treatment-resistant definitions .....                                                        | 144        |
| 12.1.1 The criteria of treatment-resistant definitions .....                                                      | 144        |
| 12.1.2 The criteria from Samara et al <sup>81</sup> .....                                                         | 154        |
| 12.2 Mean age.....                                                                                                | 163        |
| 12.3 Dose of the antipsychotics in chlorpromazine-equivalents .....                                               | 167        |
| 12.4 Publication year.....                                                                                        | 173        |
| 12.5 Baseline severity.....                                                                                       | 179        |
| 12.6 Study duration .....                                                                                         | 185        |
| 13 Risk of bias Assessment.....                                                                                   | 191        |
| 14 Investigation of the small-study effect and publication bias .....                                             | 193        |
| 15 Evaluating the confidence in NMA: CINeMA.....                                                                  | 197        |
| 16 ROB-MEN.....                                                                                                   | 201        |
| <b>17</b> References.....                                                                                         | <b>207</b> |

## 1 PRISMA checklist

| Section and Topic             | Item # | Checklist item                                                                                                                                                                                                                                                                                       | Location where item is reported |
|-------------------------------|--------|------------------------------------------------------------------------------------------------------------------------------------------------------------------------------------------------------------------------------------------------------------------------------------------------------|---------------------------------|
| <b>TITLE</b>                  |        |                                                                                                                                                                                                                                                                                                      |                                 |
| Title                         | 1      | Identify the report as a systematic review.                                                                                                                                                                                                                                                          | Page 1                          |
| <b>ABSTRACT</b>               |        |                                                                                                                                                                                                                                                                                                      |                                 |
| Abstract                      | 2      | See the PRISMA 2020 for Abstracts checklist.                                                                                                                                                                                                                                                         | Page 2                          |
| <b>INTRODUCTION</b>           |        |                                                                                                                                                                                                                                                                                                      |                                 |
| Rationale                     | 3      | Describe the rationale for the review in the context of existing knowledge.                                                                                                                                                                                                                          | Page 4                          |
| Objectives                    | 4      | Provide an explicit statement of the objective(s) or question(s) the review addresses.                                                                                                                                                                                                               | Page 4                          |
| <b>METHODS</b>                |        |                                                                                                                                                                                                                                                                                                      |                                 |
| Eligibility criteria          | 5      | Specify the inclusion and exclusion criteria for the review and how studies were grouped for the syntheses.                                                                                                                                                                                          | Page 5                          |
| Information sources           | 6      | Specify all databases, registers, websites, organisations, reference lists and other sources searched or consulted to identify studies. Specify the date when each source was last searched or consulted.                                                                                            | Page 5                          |
| Search strategy               | 7      | Present the full search strategies for all databases, registers and websites, including any filters and limits used.                                                                                                                                                                                 | Appendix3                       |
| Selection process             | 8      | Specify the methods used to decide whether a study met the inclusion criteria of the review, including how many reviewers screened each record and each report retrieved, whether they worked independently, and if applicable, details of automation tools used in the process.                     | Page 5-6                        |
| Data collection process       | 9      | Specify the methods used to collect data from reports, including how many reviewers collected data from each report, whether they worked independently, any processes for obtaining or confirming data from study investigators, and if applicable, details of automation tools used in the process. | Page 6                          |
| Data items                    | 10a    | List and define all outcomes for which data were sought. Specify whether all results that were compatible with each outcome domain in each study were sought (e.g. for all measures, time points, analyses), and if not, the methods used to decide which results to collect.                        | Page 6                          |
|                               | 10b    | List and define all other variables for which data were sought (e.g. participant and intervention characteristics, funding sources). Describe any assumptions made about any missing or unclear information.                                                                                         | Page 6                          |
| Study risk of bias assessment | 11     | Specify the methods used to assess risk of bias in the included studies, including details of the tool(s) used, how many reviewers assessed each study and whether they worked independently, and if applicable, details of automation tools used in the process.                                    | Page 8                          |
| Effect measures               | 12     | Specify for each outcome the effect measure(s) (e.g. risk ratio, mean difference) used in the synthesis or presentation of results.                                                                                                                                                                  | Page 7                          |
| Synthesis methods             | 13a    | Describe the processes used to decide which studies were eligible for each synthesis (e.g. tabulating the study intervention characteristics and comparing against the planned groups for each synthesis (item #5)).                                                                                 | Appendix5                       |
|                               | 13b    | Describe any methods required to prepare the data for presentation or synthesis, such as handling of missing summary statistics, or data conversions.                                                                                                                                                | Page 7, Appendix6.1             |

| Section and Topic             | Item # | Checklist item                                                                                                                                                                                                                                                                       | Location where item is reported |
|-------------------------------|--------|--------------------------------------------------------------------------------------------------------------------------------------------------------------------------------------------------------------------------------------------------------------------------------------|---------------------------------|
|                               | 13c    | Describe any methods used to tabulate or visually display results of individual studies and syntheses.                                                                                                                                                                               | Page 7                          |
|                               | 13d    | Describe any methods used to synthesize results and provide a rationale for the choice(s). If meta-analysis was performed, describe the model(s), method(s) to identify the presence and extent of statistical heterogeneity, and software package(s) used.                          | Page 7                          |
|                               | 13e    | Describe any methods used to explore possible causes of heterogeneity among study results (e.g. subgroup analysis, meta-regression).                                                                                                                                                 | Page 7                          |
|                               | 13f    | Describe any sensitivity analyses conducted to assess robustness of the synthesized results.                                                                                                                                                                                         | Page 8                          |
| Reporting bias assessment     | 14     | Describe any methods used to assess risk of bias due to missing results in a synthesis (arising from reporting biases).                                                                                                                                                              | Page 8                          |
| Certainty assessment          | 15     | Describe any methods used to assess certainty (or confidence) in the body of evidence for an outcome.                                                                                                                                                                                | Page 8                          |
| <b>RESULTS</b>                |        |                                                                                                                                                                                                                                                                                      |                                 |
| Study selection               | 16a    | Describe the results of the search and selection process, from the number of records identified in the search to the number of studies included in the review, ideally using a flow diagram.                                                                                         | Page 9, Appendix4               |
|                               | 16b    | Cite studies that might appear to meet the inclusion criteria, but which were excluded, and explain why they were excluded.                                                                                                                                                          | Appendix4                       |
| Study characteristics         | 17     | Cite each included study and present its characteristics.                                                                                                                                                                                                                            | Appendix5                       |
| Risk of bias in studies       | 18     | Present assessments of risk of bias for each included study.                                                                                                                                                                                                                         | Appendix13                      |
| Results of individual studies | 19     | For all outcomes, present, for each study: (a) summary statistics for each group (where appropriate) and (b) an effect estimate and its precision (e.g. confidence/credible interval), ideally using structured tables or plots.                                                     | Appendix7-8                     |
| Results of syntheses          | 20a    | For each synthesis, briefly summarise the characteristics and risk of bias among contributing studies.                                                                                                                                                                               | Page 9-12                       |
|                               | 20b    | Present results of all statistical syntheses conducted. If meta-analysis was done, present for each the summary estimate and its precision (e.g. confidence/credible interval) and measures of statistical heterogeneity. If comparing groups, describe the direction of the effect. | Page 9-12 and Appendix7-8       |
|                               | 20c    | Present results of all investigations of possible causes of heterogeneity among study results.                                                                                                                                                                                       | Page 12 and Appendix9           |
|                               | 20d    | Present results of all sensitivity analyses conducted to assess the robustness of the synthesized results.                                                                                                                                                                           | Page 13 and Appendix11          |
| Reporting biases              | 21     | Present assessments of risk of bias due to missing results (arising from reporting biases) for each synthesis assessed.                                                                                                                                                              | Page 13 and                     |

| Section and Topic                              | Item # | Checklist item                                                                                                                                                                                                                             | Location where item is reported |
|------------------------------------------------|--------|--------------------------------------------------------------------------------------------------------------------------------------------------------------------------------------------------------------------------------------------|---------------------------------|
|                                                |        |                                                                                                                                                                                                                                            | Appendix14                      |
| Certainty of evidence                          | 22     | Present assessments of certainty (or confidence) in the body of evidence for each outcome assessed.                                                                                                                                        | Page 13-14 and Appendix15       |
| <b>DISCUSSION</b>                              |        |                                                                                                                                                                                                                                            |                                 |
| Discussion                                     | 23a    | Provide a general interpretation of the results in the context of other evidence.                                                                                                                                                          | Page 14                         |
|                                                | 23b    | Discuss any limitations of the evidence included in the review.                                                                                                                                                                            | Page 17                         |
|                                                | 23c    | Discuss any limitations of the review processes used.                                                                                                                                                                                      | Page 16                         |
|                                                | 23d    | Discuss implications of the results for practice, policy, and future research.                                                                                                                                                             | Page 14-16                      |
| <b>OTHER INFORMATION</b>                       |        |                                                                                                                                                                                                                                            |                                 |
| Registration and protocol                      | 24a    | Provide registration information for the review, including register name and registration number, or state that the review was not registered.                                                                                             | Page 8                          |
|                                                | 24b    | Indicate where the review protocol can be accessed, or state that a protocol was not prepared.                                                                                                                                             | Appendix2                       |
|                                                | 24c    | Describe and explain any amendments to information provided at registration or in the protocol.                                                                                                                                            | Page 8                          |
| Support                                        | 25     | Describe sources of financial or non-financial support for the review, and the role of the funders or sponsors in the review.                                                                                                              | Page 3                          |
| Competing interests                            | 26     | Declare any competing interests of review authors.                                                                                                                                                                                         | Page 3                          |
| Availability of data, code and other materials | 27     | Report which of the following are publicly available and where they can be found: template data collection forms; data extracted from included studies; data used for all analyses; analytic code; any other materials used in the review. | Page 18                         |

## 2 Protocol

### A Network Meta-Analysis of Efficacy, Acceptability, and Tolerability of Antipsychotics in Treatment-Resistant Schizophrenia

#### Review question

To examine the efficacy, acceptability and tolerability of both first- and second-generation antipsychotic drugs for treatment-resistant schizophrenia patients of all ages by applying a network meta-analysis approach.

#### Searches

1. Electronic databases: We will search the Cochrane Schizophrenia Group's Study-Based Register of Trials with no date/time, language, document type, and publication status limitations. This register is compiled of regular searches in multiple electronic databases, ClinicalTrials.gov, WHO register of clinical trials and more. Details on the register can be found in (Shokraneh and Adams 2017, 2019, 2020, 2021).
2. Hand searching: The Cochrane Schizophrenia Group's Study-Based Register of Trials also includes hand searches. We will additionally inspect references in previous reviews on treatment-resistant schizophrenia, as well as previous reviews from our team [1-3].
3. Personal contact: We will contact via email the first and/or corresponding authors of each included study published in the last 20 years for missing information about their studies.

#### Types of study to be included

We will include all randomized trials (RCTs) comparing one antipsychotic drug with another antipsychotic agent or placebo in treatment-resistant schizophrenia, but open and single-blind RCTs will be excluded in a sensitivity analysis (see below the Analysis of subgroups or subsets). Trials in which antipsychotic drugs were used as an augmentation- or combination strategy will be excluded as well as studies with a high risk of bias in the randomization process, and studies from mainland China [4]. In the case of cross-over studies we will only use the first cross-over phase to avoid the problem of carry-over effects which are very likely in schizophrenia. We will include cluster-RCTs applying the appropriate correction of the unit of analysis, or if such a correction can be applied post-hoc. But we anticipate it could be a very rare case. The minimum duration of trials will be 3 weeks.

#### Condition or domain being studied

Schizophrenia

#### Participants/population

We will include participants with a treatment-resistant form of schizophrenia, schizophreniform disorder, or schizoaffective disorder (no age limit, any definition of treatment resistance, no restriction in diagnostic criteria, setting, gender, and ethnicity).

#### Intervention(s), exposure(s)

We will include all antipsychotic drugs that are available in at least one country, including first-generation ("typical", "conventional") antipsychotics as well as second-generation ("atypical") antipsychotics and placebo. We will include all these compounds at any dose and in any oral forms of administration (for example tablets, liquid) or as intramuscular depot formulations. If an antipsychotic is available in both oral and depot forms, both formulations will be used as separate interventions in the network.

#### Comparator(s)/control

In a network meta-analysis, any treatment can be a comparator as all antipsychotics and placebo will be used to compare with each other. Placebo will be used as reference for presentation.

#### Context

There are no restrictions in terms of setting, for example, we will include in- and outpatients.

#### Main outcome(s)

The primary outcome will be the overall symptoms of schizophrenia as measured by rating scales such as the Positive and Negative Syndrome Scale (PANSS) [5], the Brief Psychiatric Rating Scale (BPRS) [6] or of any other validated scale (e.g. the Manchester Scale [7]) for the assessment of overall schizophrenic symptomatology. As not all studies will have used the same scale, we will apply the following hierarchy: mean change of the PANSS total score from baseline to endpoint, if not available mean change of the BPRS, or if again not available the mean values at endpoint of the PANSS/ BPRS. The results of other rating scales will only be used if the instrument has been published in a peer-reviewed journal, because it has been shown that unvalidated schizophrenia scales exaggerate differences [8].

#### *Measures of effect*

The effect size for the primary outcome will be the standardized mean difference (SMD), presented with their 95% CIs, because we expect different rating scales of schizophrenia symptomatology can be used in studies. We will give preference to the estimates based on imputation methods to handle missing data (used by the original authors) over completers' data.

#### **Additional outcome(s)**

1. Response to treatment. The following hierarchy of the response definitions will be applied: at least 20% reduction of the baseline score of the PANSS, 20% reduction of the BPRS or 20% reduction of any other global schizophrenia rating scale, at least "minimally improved" (score of 3) on the Clinical Global-Improvements-Improvement Scale (CGI). We choose this cutoff because even minimal improvement can be clinically important for treatment-resistant patients. If none of these definitions is available, we will use the original authors' primary definition [9].
2. Positive symptoms, measured by published rating scales.
3. Negative symptoms, measured by published rating scales.
4. Dropout due to any reason. Premature discontinuation due to any reason combines efficacy, tolerability, and other factors and can therefore be considered as a measure of "overall acceptability of treatment".
5. Dropout due to specific reasons. Dropout due to inefficacy of treatment will be considered as an additional outcome of the efficacy of treatment. Dropout due to the occurrence of adverse events will be used as a measure of overall tolerability.
6. Specific adverse events. We will focus on five most common adverse events, use of antiparkinson medication (dichotomous outcome), weight gain (kg, continuous outcome), sedation (dichotomous outcome), prolactin levels (ng/mL, continuous outcome) and QTc prolongation (ms, continuous outcome).
7. Quality of life. We will accept any published rating scale such as Heinrichs quality of life scale, Quality of Life Scale (QOLS), or any other published rating scale.
8. Functioning. Functioning will be measured by rating scales such as the Global Assessment of Functioning, the Psychosocial Performance Scale, or any other published rating scale.

#### *Measures of effect*

The effect size for continuous outcomes will be the standardized mean difference (SMD), presented with their 95% CIs, since we expect different rating scales of schizophrenia symptomatology, quality of life and functioning can be used in studies. Nevertheless, we will use mean differences (MD) for weight gain (kg), prolactin levels (ng/ml) and QTc prolongation (ms), since we can convert values of these outcomes into the same metric. We will give preference to the estimates based on imputation methods to handle missing data (used by the original authors) over completers' data.

The effect size for dichotomous outcomes will be the odds ratio (OR) and its 95% confidence intervals (CIs), because odds ratio has better mathematical properties. But we will convert back to relative risks (RRs) and percentages in treatment and control groups for presentation of the results.

#### **Data extraction (selection and coding)**

1. Selection of trials: Two reviewers will independently inspect all abstracts identified in the searches. Disagreement will be resolved by discussion, and where doubt still remains, we will acquire the full article for further inspection. Once the full articles are obtained, at least two reviewers will independently decide whether the studies meet the review criteria. If disagreement cannot be resolved by discussion, we will resolve it with a third reviewer or seek further information from the study authors.



2. Data extraction: At least two reviewers will independently extract data from all selected trials on specifically customized digital forms in the Microsoft Access database. Disagreement will be resolved by discussion with a third reviewer or by contacting the study authors.

### **Risk of bias (quality) assessment**

Two independent reviewers will assess risk of bias of individual studies using the Cochrane Risk of Bias tool, RoB 2.0 [10].

### **Strategy for data synthesis**

1. Two-step procedure. In a first step we will perform series of conventional pair-wise meta-analyses by combining studies that compared the same interventions. In a second step we will then perform network meta-analysis within a frequentist framework [11]. The analysis and presentation of results will be performed using R (meta and netmeta packages).

2. The heterogeneity (variability in relative treatment effects within the same treatment comparison) will be measured with the tau-squared (the variance of the random effects distribution). The heterogeneity variance will be assumed common across the various treatment comparisons and we will compare the empirical distribution with predictive distributions [12, 13]. Potential reasons for heterogeneity will be explored by subgroup analysis (see below the Analysis of subgroups or subsets).

3. Assessment of the transitivity. Intransitive networks can lead to misleading estimates. Therefore, we will assess the transitivity assumption by investigating the distribution of clinical and methodological variables that can act as effect modifiers across treatment comparisons. Potential effect modifiers are listed under “Analysis of subgroups or subsets “below. We will investigate if these variables are similarly distributed across studies grouped by comparison.

4. Network meta-analysis. We will conduct a random effects network meta-analysis to synthesize all evidence for each outcome, and obtain a comprehensive ranking of all treatments. Treatments will be ranked for each outcome using P-scores [14]. A key assumption is coherence, meaning the agreement between direct and indirect evidence. This will be assessed locally for each closed loop using the separating indirect from direct evidence approach, and globally for the whole network using a design-by-treatment interaction model. In case incoherence, we will investigate possible sources of it (mistakes in data entry, clear differences in study characteristics) and utilize analytical approaches [15]. If the requirements of network meta-analysis are not met (low likelihood of transitivity and/or large unexplained inconsistency) we will use pairwise meta-analysis for data synthesis.

5. Assessment of the confidence in the evidence. The confidence in the relative treatment effects for the primary outcome will be evaluated using the Confidence in Network Meta-Analysis framework [16, 17], implemented in the web application ([http://cinema.ispm.ch/model/CINeMA\\_paper.pdf](http://cinema.ispm.ch/model/CINeMA_paper.pdf)). This tool evaluates the credibility of the findings across the domains of within-study bias, across-study bias, indirectness, imprecision, heterogeneity and incoherence.

### **Analysis of subgroups or subsets**

The following potential effect moderators of the primary outcome will be explored by subgroup analyses:

1. The criteria of treatment-resistant definitions
2. Mean participant age
3. Dose of the antipsychotics in chlorpromazine-equivalents according to Gardner et al. [18]
4. Publication date (to address the effect of possibly generally decreasing effect sizes over time)
5. Severity of illness at baseline (PANSS or BPRS score at baseline)
6. Study duration

Sensitivity analyses will be performed as follow:

1. Exclusion of non-double-blind studies (open and single-blind studies)
2. Exclusion of studies that presented only completer analyses
3. Exclusion of studies that did not use operationalized criteria to diagnose schizophrenia
4. Exclusion of studies with an overall assessment of high risk of bias
5. Exclusion of studies only included children and/or adolescents

### **Contact details for further information**

Stefan Leucht

stefan.leucht@tum.de

### **Organisational affiliation of the review**

Department of Psychiatry and Psychotherapy, School of Medicine, Technical University of Munich, Munich, Germany

<https://www.tum.de/>

### **Review team members and their organisational affiliations**

Ms Shimeng Dong. Department of Psychiatry and Psychotherapy, School of Medicine, Technical University of Munich, Munich, Germany

Dr Johannes Schneider-Thoma. Department of Psychiatry and Psychotherapy, School of Medicine, Technical University of Munich, Munich, Germany

Mr Spyridon Siafis. Department of Psychiatry and Psychotherapy, School of Medicine, Technical University of Munich, Munich, Germany

Mr Dongfang Wang. Department of Psychiatry and Psychotherapy, School of Medicine, Technical University of Munich, Munich, Germany

Professor Stefan Leucht. Department of Psychiatry and Psychotherapy, School of Medicine, Technical University of Munich, Munich, Germany

### **Type and method of review**

Network meta-analysis

### **Anticipated or actual start date**

01 June 2021

### **Anticipated completion date**

31 June 2022

### **Funding sources/sponsors**

China Scholarship Council (CSC)

### **Language**

English

### **Country**

Germany

### **References**

1. Huhn, M., et al., *Comparative efficacy and tolerability of 32 oral antipsychotics for the acute treatment of adults with multi-episode schizophrenia: a systematic review and network meta-analysis*. *Lancet*, 2019. **394**(10202): p. 939-951.
2. Samara, M.T., et al., *Efficacy, Acceptability, and Tolerability of Antipsychotics in Treatment-Resistant Schizophrenia: A Network Meta-analysis*. *JAMA Psychiatry*, 2016. **73**(3): p. 199-210.
3. Krause, M., et al., *Efficacy, acceptability, and tolerability of antipsychotics in children and adolescents with schizophrenia: A network meta-analysis*. *Eur Neuropsychopharmacol*, 2018. **28**(6): p. 659-674.
4. Wu, T., et al., *Randomized trials published in some Chinese journals: how many are randomized?* *Trials*, 2009. **10**: p. 46.
5. Kay, S.R., A. Fiszbein, and L.A. Opler, *The positive and negative syndrome scale (PANSS) for schizophrenia*. *Schizophr Bull*, 1987. **13**(2): p. 261-76.
6. Overall, J.E. and D.R. Gorham, *The Brief Psychiatric Rating Scale*. *Psychological Reports*, 1962. **10**(3): p. 799-812.
7. Krawiecka, M., D. Goldberg, and M. Vaughan, *A standardized psychiatric assessment scale for rating chronic psychotic patients*. *Acta Psychiatr Scand*, 1977. **55**(4): p. 299-308.

8. Marshall, M., et al., *Unpublished rating scales: a major source of bias in randomised controlled trials of treatments for schizophrenia*. Br J Psychiatry, 2000. **176**: p. 249-52.
9. Leucht, S., et al., *Linking the PANSS, BPRS, and CGI: clinical implications*. Neuropsychopharmacology, 2006. **31**(10): p. 2318-25.
10. Sterne, J.A.C., et al., *RoB 2: a revised tool for assessing risk of bias in randomised trials*. BMJ, 2019. **366**: p. l4898.
11. Rücker, G., *Network meta-analysis, electrical networks and graph theory*. Res Synth Methods, 2012. **3**(4): p. 312-24.
12. Turner, R.M., et al., *Predicting the extent of heterogeneity in meta-analysis, using empirical data from the Cochrane Database of Systematic Reviews*. Int J Epidemiol, 2012. **41**(3): p. 818-27.
13. Rhodes, K.M., R.M. Turner, and J.P. Higgins, *Predictive distributions were developed for the extent of heterogeneity in meta-analyses of continuous outcome data*. J Clin Epidemiol, 2015. **68**(1): p. 52-60.
14. Rücker, G. and G. Schwarzer, *Ranking treatments in frequentist network meta-analysis works without resampling methods*. BMC Med Res Methodol, 2015. **15**: p. 58.
15. Salanti, G., *Indirect and mixed-treatment comparison, network, or multiple-treatments meta-analysis: many names, many benefits, many concerns for the next generation evidence synthesis tool*. Res Synth Methods, 2012. **3**(2): p. 80-97.
16. Nikolakopoulou, A., et al., *CINeMA: An approach for assessing confidence in the results of a network meta-analysis*. PLoS Med, 2020. **17**(4): p. e1003082.
17. Salanti, G., et al., *Evaluating the quality of evidence from a network meta-analysis*. PLoS One, 2014. **9**(7): p. e99682.
18. Gardner, D.M., et al., *International consensus study of antipsychotic dosing*. Am J Psychiatry, 2010. **167**(6): p. 686-93.

### 3 Search strategy

We searched the register of the Cochrane Schizophrenia Group.

Following the methods from Cochrane,<sup>1</sup> the Information Specialist compiles this register from systematic searches of major resources and their monthly updates (unless otherwise specified):

1. MEDLINE;
2. Embase;
3. Allied and Complementary Medicine (AMED);
4. Cumulative Index to Nursing and Allied Health Literature (CINAHL);
5. PsycINFO;
6. PubMed;
7. US National Institute of Health Ongoing Trials Register ClinicalTrials.gov;
8. World Health Organization International Clinical Trials Registry Platform ([www.who.int/ictrp](http://www.who.int/ictrp));
9. ProQuest Dissertations and Theses A&I and its quarterly update;
10. Chinese databases (Chinese Biomedical Literature Database, China Knowledge Resource Integrated Database, and Wanfang) and their annual updates until the end of 2016.

The register also includes hand searches and conference proceedings (see Group's website: <http://schizophrenia.cochrane.org/register-trials>). It does not place any limitations on language, date, document type or publication status. Further information about the register has been published by Shokraneh et al.<sup>2-5</sup>

The search strategy of the first search (27/04/2020) was:

```
((*Amisulpride* OR *Aripiprazole* OR *Asenapine* OR *Benperidol* OR *Brexiprazole* OR *Cariprazine* OR *Chlorpromazine* OR *Clopenthixol* OR *Clozapine* OR *Flupentixol* OR *Fluphenazine* OR *Fluspirilene* OR *Haloperidol* OR *Iloperidone* OR *Levomepromazine* OR *Loxapine* OR *Lumateperone* OR *Lurasidone* OR *Molindone* OR *Olanzapine* OR *Paliperidone* OR *Penfluridol* OR *Perazine* OR *Perphenazine* OR *Pimozide* OR *Quetiapine* OR *Risperidone* OR *Sertindole* OR *Sulpiride* OR *Thioridazine* OR *Tiotixene* OR *Trifluoperazine* OR *Ziprasidone* OR *Zotepine* OR *Zuclopenthixol*) in Intervention Field of Study)
```

The second and the third update searches of the Cochrane Schizophrenia Group Register were made on September 19, 2021 and March 06, 2022, respectively. Both searches were not restricted to the antipsychotic drugs above, all controlled trials of schizophrenia were inspected. Apart from this all descriptions of the register etc. above applied.

The last update search was conducted in MEDLINE (20/01/2023) with the following search strategy:

Database: Ovid MEDLINE(R) and Epub Ahead of Print, In-Process, In-Data-Review & Other Non-Indexed Citations and Daily <1946 to January 20, 2023>

Search Strategy:

- 1 randomized controlled trial.pt. (584874)
- 2 controlled clinical trial.pt. (95158)
- 3 randomized.ab. (590240)
- 4 placebo.ab. (235122)
- 5 clinical trials as topic.sh. (200778)
- 6 randomly.ab. (400293)
- 7 trial.ab. (632640)
- 8 or/1-7 (1692527)
- 9 exp animals/ not humans.sh. (5084723)
- 10 8 not 9 (1552536)
- 11 exp SCHIZOPHRENIA/ (113837)
- 12 exp Paranoid Disorders/ (4248)
- 13 schizo\$.mp. (187748)
- 14 hebephreni\$.mp. (287)
- 15 oligophreni\$.mp. (1146)
- 16 psychotic\$.mp. (77111)
- 17 psychosis.mp. (45087)
- 18 psychoses.mp. (21437)
- 19 ((chronic\$ or sever\$) adj2 mental\$ adj2 (ill\$ or disorder\$)).mp. (10531)
- 20 exp dyskinesia, drug-induced/ (7370)
- 21 exp psychomotor agitation/ (6916)
- 22 exp neuroleptic malignant syndrome/ (2143)
- 23 exp "diagnosis, dual (psychiatry)"/ (3725)
- 24 (tardiv\$ adj dyskine\$).mp. (4583)
- 25 akathisi\$.mp. (3065)
- 26 acathisi\$.mp. (14)
- 27 (neuroleptic\$ and (malignant adj2 syndrome)).mp. (2883)
- 28 (neuroleptic\$ and (movement and disorder\$)).mp. (983)
- 29 parkinsoni\$.mp. (34289)
- 30 neuroleptic-induc\$.mp. (1276)
- 31 or/24-30 (44295)
- 32 31 not (parkinson's adj1 disease).ti. (36572)
- 33 or/11-23 (273796)
- 34 or/32-33 (300026)
- 35 and/10,34 (23251)
  
- 36 Amisulpride/ (792)
- 37 Aripiprazole/ (2818)
- 38 Asenapine.mp. (486)
- 39 Benperidol/ (799)
- 40 Brexpiprazole.mp. (316)
- 41 Cariprazine.mp. (360)
- 42 Chlorpromazine/ (17378)
- 43 Clopenthixol/ (408)
- 44 Clopenthixol/ (408)
- 45 Flupenthixol/ (927)
- 46 Fluphenazine/ (2427)
- 47 Fluspirilene/ (113)
- 48 Haloperidol/ (16016)
- 49 lloperidone.mp. (234)

50 Methotrimeprazine/ or Levomepromazine.mp. (1031)  
51 Loxapine/ (319)  
52 Lumateperone.mp. (54)  
53 Lurasidone Hydrochloride/ (344)  
54 Molindone/ (145)  
55 Olanzapine/ (6157)  
56 Paliperidone Palmitate/ (1016)  
57 Penfluridol/ (179)  
58 Perazine/ (158)  
59 Perphenazine/ (1593)  
60 Pimozide/ (1741)  
61 Quetiapine Fumarate/ (3107)  
62 Risperidone/ (6709)  
63 Sertindole.mp. (491)  
64 Sulpiride/ (4029)  
65 Thioridazine/ (2393)  
66 Thiothixene/ (335)  
67 Trifluoperazine/ (3614)  
68 Ziprasidone.mp. (2135)  
69 Zotepine.mp. (303)  
70 Zuclopenthixol.mp. (313)  
71 or/36-70 (64470)  
  
72 limit 71 to yr="2022 - 2023" (928)  
73 and/35,72 (100)

Although Pipotiazine was not part of our initial search strategy, we decided to include it in this study because it was a comparator in a three-armed trial.<sup>6</sup>

## 4 Flow chart

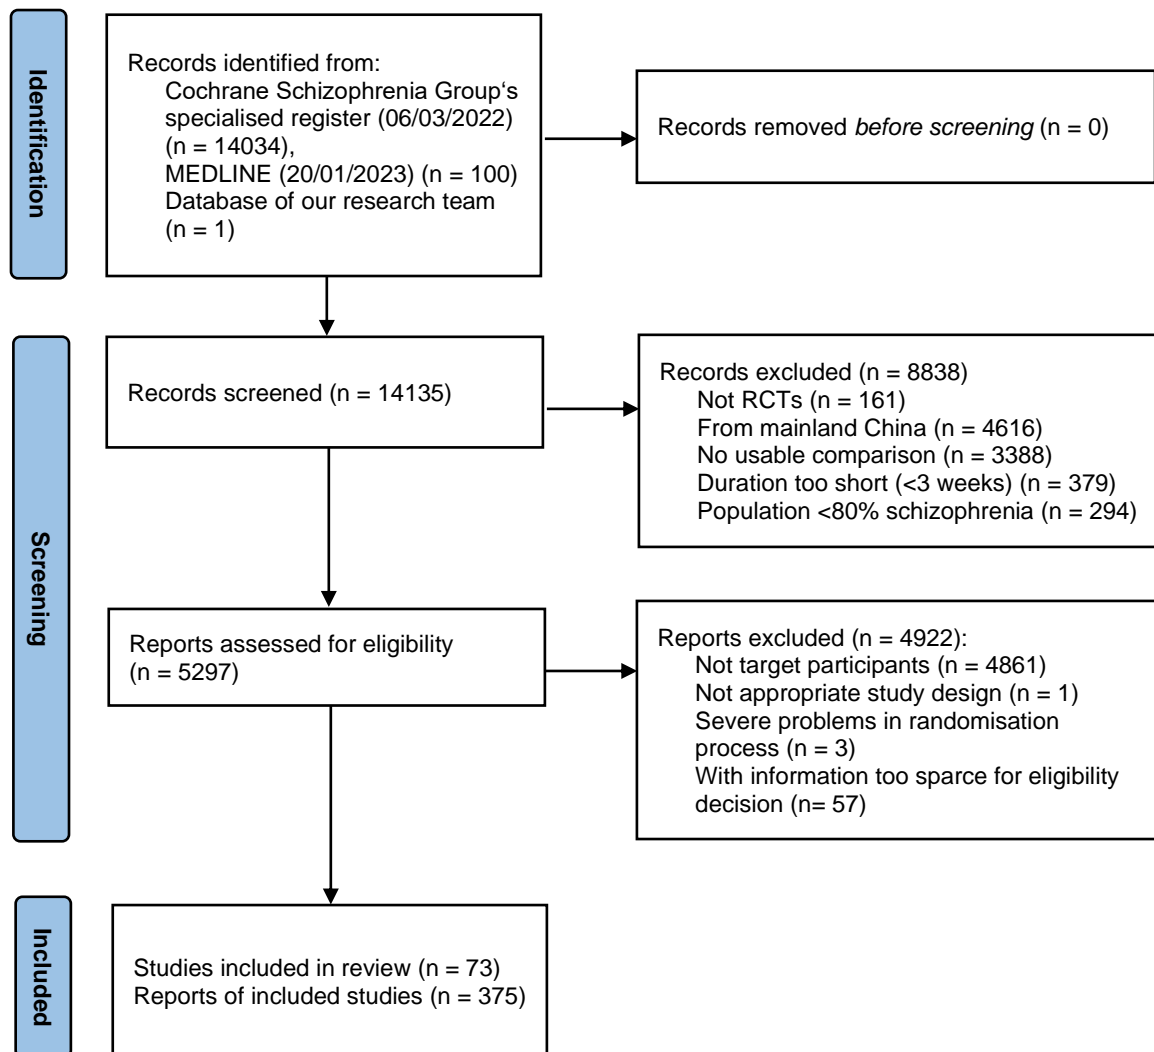

Reference from the database of our research team.<sup>7</sup> RCTs = randomized controlled trials.

## 5 Characteristics and references of included studies

### 5.1 Characteristics and references of specific studies with usable data

| Study                                 | Duration (weeks) | Study Design | Diagnosis                          | Definition of treatment-resistance                                                  | Intervention   | Application, interval, mean dose in mg (range) | Randomized N | Mean age |
|---------------------------------------|------------------|--------------|------------------------------------|-------------------------------------------------------------------------------------|----------------|------------------------------------------------|--------------|----------|
| Actrn1261800 1113246 <sup>8</sup>     | 26               | OL-RCT       | Schizophrenia (DSM-V)              | Unsuccessful treatment with 1 oral antipsychotic                                    | Paliperidone   | Depot, 4 weeks, n.i. (50-150)                  | 36           | 46.4     |
|                                       |                  |              |                                    |                                                                                     | Paliperidone   | Oral, daily, n.i. (6-12)                       | 36           | 46.4     |
| Ahlfors 1980 <sup>9</sup>             | 26               | DB-RCT       | Schizophrenia (clinical diagnosis) | Unsatisfactory response to present neuroleptic treatment                            | Clopentixol    | Depot, 2 weeks, 280 (50-280)                   | 87           | n.i.     |
|                                       |                  |              |                                    |                                                                                     | Perphenazine   | Depot, 2 weeks, 141 (20-600)                   | 85           | n.i.     |
| Altamura 2002 <sup>10</sup>           | 14               | DB-RCT       | Paranoid schizophrenia (DSM-IV)    | partial response to previous treatments, at least 2 retrospective trials            | Haloperidol    | Oral, daily, 12.3 (5-20)                       | 15           | 38.3     |
|                                       |                  |              |                                    |                                                                                     | Olanzapine     | Oral, daily, 12.4 (10-20)                      | 13           | 39.3     |
| Alvarez 2006 <sup>11</sup>            | 52               | OL-RCT       | Schizophrenia (DSM-IV)             | Prominent negative symptoms and previously treated with conventional antipsychotics | Olanzapine     | Oral, daily, 12.2 (10-n.i.)                    | 124          | 37       |
|                                       |                  |              |                                    |                                                                                     | Risperidone    | Oral, daily, 4.9 (3-n.i.)                      | 123          | 35.5     |
| AstraZeneca 5077IL/0031 <sup>12</sup> | 10               | DB-RCT       | Schizophrenia (DSM-IV)             | Historical and prospective criteria of treatment-resistance                         | Quetiapine     | Oral, daily, 571.2 (n.i. -750)                 | 130          | 41       |
|                                       |                  |              |                                    |                                                                                     | Chlorpromazine | Oral, daily, 1040.4 (n.i. -1500)               | 130          | 40.8     |
| AstraZeneca 5077IL/0054 <sup>13</sup> | 10               | DB-RCT       | Schizophrenia (DSM-IV)             | Treatment-resistance, at least 2 retrospective trials                               | Quetiapine     | Oral, daily, 600 (600-600)                     | 117          | 39       |
|                                       |                  |              |                                    |                                                                                     | Chlorpromazine | Oral, daily, 900 (900-900)                     | 119          | 39       |
| Azorin 2001 <sup>14</sup>             | 12               | DB-RCT       | Schizophrenia (DSM-IV)             | Poor response to previous treatment, at least 2 retrospective trials                | Clozapine      | Oral, daily, 642 (200-900)                     | 138          | 38.2     |
|                                       |                  |              |                                    |                                                                                     | Risperidone    | Oral, daily, 9 (2-15)                          | 135          | 39.4     |
| Bitter 2004 <sup>15</sup>             | 18               | DB-RCT       | Schizophrenia (DSM-IV)             | Treatment-resistance or intolerance, at least 1 retrospective trial                 | Clozapine      | Oral, daily, 216.2 (100-500)                   | 72           | 37.4     |
|                                       |                  |              |                                    |                                                                                     | Olanzapine     | Oral, daily, 17.2 (5-25)                       | 75           | 37.6     |
| Bondolfi 1998 <sup>16</sup>           | 8                | DB-RCT       | Schizophrenia (DSM-III-R)          | Treatment-resistance or intolerance, at least 2                                     | Clozapine      | Oral, daily, 291.2 (150-400)                   | 43           | 36.2     |
|                                       |                  |              |                                    |                                                                                     | Risperidone    | Oral, daily, 6.4 (3-10)                        | 43           | 38.3     |



|                              |    |        |                                                                                   |                                                                                                  |                |                               |     |       |
|------------------------------|----|--------|-----------------------------------------------------------------------------------|--------------------------------------------------------------------------------------------------|----------------|-------------------------------|-----|-------|
|                              |    |        |                                                                                   | retrospective trials                                                                             |                |                               |     |       |
| Breier 1999a <sup>17</sup>   | 6  | DB-RCT | Schizophrenia (DSM-IV)                                                            | Partial response to neuroleptics, at least 1 retrospective and 1 prospective trials              | Clozapine      | Oral, daily, 403.6 (200-600)  | 14  | 37.7  |
|                              |    |        |                                                                                   |                                                                                                  | Risperidone    | Oral, daily, 5.9 (2-9)        | 15  | 32.4  |
| Breier 1999b <sup>18</sup>   | 6  | DB-RCT | Schizophrenia, schizophreniform disorder, or schizoaffective disorder (DSM-III-R) | Treatment-resistance, at least 1 retrospective trial                                             | Olanzapine     | Oral, daily, 11.1 (5-20)      | 352 | 38.3  |
|                              |    |        |                                                                                   |                                                                                                  | Haloperidol    | Oral, daily, 10 (5-20)        | 174 | 38.2  |
| Browne 1988 <sup>19</sup>    | 20 | DB-RCT | Schizophrenia (Feighner's criteria, 1972)                                         | Treatment-resistance, at least 1 retrospective trial                                             | Haloperidol    | Oral, daily, n.i. (10-160)    | 6   | 40.88 |
|                              |    |        |                                                                                   |                                                                                                  | Placebo        | Oral, daily                   | 5   | 40.88 |
| Buchanan 1998 <sup>20</sup>  | 10 | DB-RCT | Schizophrenia or schizoaffective disorder (DSM-III-R)                             | Partial response to conventional neuroleptics, at least 2 retrospective and 1 prospective trials | Clozapine      | Oral, daily, 415 (200-600)    | 38  | 41    |
|                              |    |        |                                                                                   |                                                                                                  | Haloperidol    | Oral, daily, 25.2 (10-30)     | 37  | 40.1  |
| Buchanan 2005 <sup>21</sup>  | 16 | DB-RCT | Schizophrenia or schizoaffective disorder (DSM-IV)                                | Partial response to conventional neuroleptics, at least 2 retrospective and 1 prospective trials | Haloperidol    | Oral, daily, 18.3 (10-30)     | 34  | 46.4  |
|                              |    |        |                                                                                   |                                                                                                  | Olanzapine     | Oral, daily, 20.3 (10-30)     | 29  | 41.9  |
| Chen 2012 <sup>22</sup>      | 8  | SB-RCT | Schizophrenia (DSM-IV)                                                            | Inadequate response to only 1 line of first-generation antipsychotics, 1 retrospective trial     | Olanzapine     | Oral, daily, 17.8 (n.i. -20)  | 16  | 37.9  |
|                              |    |        |                                                                                   |                                                                                                  | Risperidone    | Oral, daily, 4.3 (n.i. -6)    | 16  | 36.7  |
| Chowdhury 1999 <sup>23</sup> | 16 | n.i.   | Schizophrenia and its subtypes (ICD-10)                                           | Inadequate response, at least 1 retrospective trial                                              | Clozapine      | Oral, daily, 342.86 (200-500) | 30  | 30.3  |
|                              |    |        |                                                                                   |                                                                                                  | Risperidone    | Oral, daily, 5.8 (4-8)        | 30  | 32.43 |
| Claus 1992 <sup>24</sup>     | 12 | DB-RCT | Schizophrenia (DSM-III-R)                                                         | Treatment-resistance, at least 1 retrospective trial                                             | Haloperidol    | Oral, daily, 10.3 (10.3-10.3) | 22  | 39    |
|                              |    |        |                                                                                   |                                                                                                  | Risperidone    | Oral, daily, 12 (12-12)       | 22  | 37.4  |
| Conley 1998 <sup>25</sup>    | 8  | DB-RCT | Schizophrenia (DSM-III-R)                                                         | Treatment-resistance, at least 2 retrospective and 1 prospective trials                          | Chlorpromazine | Oral, daily, 1200 (1200-1200) | 42  | 42.63 |
|                              |    |        |                                                                                   |                                                                                                  | Olanzapine     | Oral, daily, 25 (25-25)       | 42  | 42.91 |

|                              |    |        |                                                                       |                                                                                                                   |                |                                 |     |       |
|------------------------------|----|--------|-----------------------------------------------------------------------|-------------------------------------------------------------------------------------------------------------------|----------------|---------------------------------|-----|-------|
| Conley 2003 <sup>26</sup>    | 8  | DB-RCT | Schizophrenia (DSM-IV)                                                | Treatment-resistance, at least 2 retrospective trials                                                             | Clozapine      | Oral, daily, 390 (300-450)      | 5   | 40.26 |
|                              |    |        |                                                                       |                                                                                                                   | Olanzapine     | Oral, daily, 50 (30-50)         | 8   | 35.91 |
| Conley 2005 <sup>27</sup>    | 12 | DB-RCT | Schizophrenia (DSM-IV)                                                | Treatment-resistance, at least 2 retrospective and 1 prospective trials                                           | Fluphenazine   | Oral, daily, 13.2 (10-15)       | 13  | 44.2  |
|                              |    |        |                                                                       |                                                                                                                   | Quetiapine     | Oral, daily, 463.6 (300-500)    | 12  | 43.7  |
|                              |    |        |                                                                       |                                                                                                                   | Risperidone    | Oral, daily, 4.31 (3-5)         | 13  | 46.3  |
| Daniel 1996 <sup>28</sup>    | 6  | SB-RCT | Schizophrenia or schizoaffective disorder (DSM-III-R)                 | Multiple past treatment failures or intolerance of conventional antipsychotic side effects                        | Clozapine      | Oral, daily, n.i. (n.i. - n.i.) | 10  | 33.8  |
|                              |    |        |                                                                       |                                                                                                                   | Risperidone    | Oral, daily, n.i. (n.i. - n.i.) | 10  | 33.8  |
| Dean 1958 <sup>29</sup>      | 15 | DB-RCT | Schizophrenia (clinical diagnosis)                                    | Fail to respond to previous treatment                                                                             | Chlorpromazine | Oral, daily, n.i. (2000-3000)   | 9   | 37    |
|                              |    |        |                                                                       |                                                                                                                   | Placebo        | Oral, daily                     | 9   | 37    |
| Emsley 2000 <sup>30</sup>    | 8  | DB-RCT | Schizophrenia (DSM-IV)                                                | History of unsuccessful antipsychotic therapy, at least 1 retrospective and 1 prospective trials                  | Haloperidol    | Oral, daily, 20 (20-20)         | 145 | 38.8  |
|                              |    |        |                                                                       |                                                                                                                   | Quetiapine     | Oral, daily, 600 (600-600)      | 143 | 37.7  |
| Hall 1968 <sup>31</sup>      | 12 | DB-RCT | Schizophrenia (clinical diagnosis)                                    | Treatment-resistance, at least 2 retrospective trials                                                             | Haloperidol    | Oral, daily, 6.95 (2-10)        | 25  | 45    |
|                              |    |        |                                                                       |                                                                                                                   | Fluphenazine   | Oral, daily, 17.86 (5-25)       | 25  | 45    |
| Hong 1997 <sup>32</sup>      | 12 | DB-RCT | Schizophrenia (DSM-IV)                                                | Treatment-resistance, at least 2 retrospective and 1 prospective trials                                           | Clozapine      | Oral, daily, 543 (100-900)      | 21  | 39.7  |
|                              |    |        |                                                                       |                                                                                                                   | Chlorpromazine | Oral, daily, 1163 (200-1800)    | 19  | 37.1  |
| Honigfeld 1984 <sup>33</sup> | 4  | DB-RCT | Schizophrenia (DSM-II)                                                | Poor response to previous therapy or sensitivity to extra-pyramidal side effects, at least 2 retrospective trials | Clozapine      | Oral, daily, 417 (150-900)      | 75  | 30    |
|                              |    |        |                                                                       |                                                                                                                   | Chlorpromazine | Oral, daily, 795 (300-1800)     | 76  | 30    |
| Howard 1974 <sup>34</sup>    | 12 | DB-RCT | Chronic psychosis (clinical diagnosis)                                | Treatment-resistance                                                                                              | Haloperidol    | Oral, daily, 61.57 (10-133.33)  | 17  | 46.6  |
|                              |    |        |                                                                       |                                                                                                                   | Placebo        | Oral, daily                     | 16  | 47.8  |
|                              |    |        |                                                                       |                                                                                                                   | Tiotixene      | Oral, daily, 184.7 (30-400)     | 16  | 45.3  |
| Kahn 2018 <sup>35</sup>      | 6  | DB-RCT | Schizophrenia, schizophreniform disorder, or schizoaffective disorder | Not in remission from 1 prospective trial                                                                         | Amisulpride    | Oral, daily, 590.9 (200-800)    | 47  | 24.9  |
|                              |    |        |                                                                       |                                                                                                                   | Olanzapine     | Oral, daily, 15.6 (5-20)        | 46  | 24.6  |

|                           |    |        | (DSM-IV)                                                                          |                                                                                                       |                |                               |     |       |
|---------------------------|----|--------|-----------------------------------------------------------------------------------|-------------------------------------------------------------------------------------------------------|----------------|-------------------------------|-----|-------|
| Kane 1988 <sup>36</sup>   | 6  | DB-RCT | Schizophrenia (DSM-III)                                                           | Treatment-resistance, at least 3 retrospective and 1 prospective trials                               | Clozapine      | Oral, daily, 600 (500-900)    | 126 | 36.2  |
|                           |    |        |                                                                                   |                                                                                                       | Chlorpromazine | Oral, daily, 1200 (1000-1800) | 142 | 35.6  |
| Kane 2001 <sup>37</sup>   | 29 | DB-RCT | Schizophrenia or schizoaffective disorder (DSM-III-R)                             | Partial or poor response, at least 3 retrospective trials or 2 retrospective and 1 prospective trials | Clozapine      | Oral, daily, 523 (200-800)    | 37  | 41    |
|                           |    |        |                                                                                   |                                                                                                       | Haloperidol    | Oral, daily, 18.9 (4-16)      | 34  | 40    |
| Kane 2006 <sup>38</sup>   | 12 | DB-RCT | Schizophrenia (DSM-III-R)                                                         | Treatment-resistance, at least 3 retrospective and 1 prospective trials                               | Chlorpromazine | Oral, daily, 743.6 (200-1200) | 154 | 34.4  |
|                           |    |        |                                                                                   |                                                                                                       | Ziprasidone    | Oral, daily, 153.8 (80-160)   | 152 | 35.6  |
| Kane 2007 <sup>39</sup>   | 6  | DB-RCT | Schizophrenia (DSM-IV)                                                            | Treatment-resistance, at least 2 retrospective and 1 prospective trials                               | Aripiprazole   | Oral, daily, 28.8 (15-30)     | 154 | 42.6  |
|                           |    |        |                                                                                   |                                                                                                       | Perphenazine   | Oral, daily, 39.1 (8-64)      | 146 | 41.6  |
| Kane 2011 <sup>40</sup>   | 12 | DB-RCT | Schizophrenia (DSM-IV)                                                            | Treatment-resistance, at least 1 retrospective and 1 prospective trials                               | Risperidone    | Oral, daily, 9 (6-12)         | 105 | 38.8  |
|                           |    |        |                                                                                   |                                                                                                       | Sertindole     | Oral, daily, 18.1 (12-24)     | 216 | 38.9  |
| Kinon 1993b <sup>41</sup> | 4  | DB-RCT | Schizophrenia, schizoaffective disorder, or schizophreniform disorder (DSM-III-R) | Treatment-resistance, non-response to 1 prospective trial                                             | Haloperidol    | Oral, daily, 20 (20-20)       | 13  | n.i.  |
|                           |    |        |                                                                                   |                                                                                                       | Fluphenazine   | Oral, daily, 48.24 (20-80)    | 34  | n.i.  |
| Kinon 2009 <sup>42</sup>  | 12 | DB-RCT | Schizophrenia, schizoaffective disorder, or schizophreniform disorder (DSM-IV)    | Treatment-resistance, non-response to 1 prospective trial                                             | Risperidone    | Oral, daily, n.i. (2-6)       | 192 | 41.87 |
|                           |    |        |                                                                                   |                                                                                                       | Olanzapine     | Oral, daily, n.i. (10-20)     | 186 | 41.84 |
| Kumra 1996 <sup>43</sup>  | 6  | DB-RCT | Schizophrenia (DSM-III-R)                                                         | Non-response or/and intolerance, at least 2 retrospective trials                                      | Clozapine      | Oral, daily, 176 (6.25-525)   | 10  | 14.4  |
|                           |    |        |                                                                                   |                                                                                                       | Haloperidol    | Oral, daily, 16 (0.25-27)     | 11  | 13.73 |
| Kumra 2007 <sup>44</sup>  | 12 | DB-RCT | Schizophrenia or                                                                  | Treatment-resistance, at least 2 retrospective trials                                                 | Clozapine      | Oral, daily, 403.1 (50-700)   | 18  | 15.8  |

|                                     |    |                       |                                                    |                                                                         |                 |                                  |     |      |
|-------------------------------------|----|-----------------------|----------------------------------------------------|-------------------------------------------------------------------------|-----------------|----------------------------------|-----|------|
|                                     |    |                       | schizoaffective disorder (DSM-IV)                  |                                                                         | Olanzapine      | Oral, daily, 26.2 (10-30)        | 21  | 15.5 |
| Lal 2006 <sup>45</sup>              | 15 | DB-RCT                | Schizophrenia (DSM-III-R)                          | Treatment-resistance, at least 3 retrospective and 1 prospective trials | Chlorpromazine  | Oral, daily, 762 (600-1000)      | 19  | 39.4 |
|                                     |    |                       |                                                    |                                                                         | Levomepromazine | Oral, daily, 813 (600-1000)      | 19  | 38.5 |
| Marjerrison 1964 <sup>46</sup>      | 30 | DB-RCT                | Chronic psychosis (clinical diagnosis)             | Treatment-resistance                                                    | Placebo         | Oral, daily                      | 34  | 47   |
|                                     |    |                       |                                                    |                                                                         | Trifluoperazine | Oral, daily, 28 (n.i. – n.i.)    | 16  | 49   |
| McCreadie 1977 <sup>47</sup>        | 12 | DB-RCT                | Schizophrenia (clinical diagnosis)                 | Treatment-resistance                                                    | Chlorpromazine  | Oral, daily, 350 (100-600)       | 10  | 52   |
|                                     |    |                       |                                                    |                                                                         | Haloperidol     | Oral, daily, 57.5 (15-100)       | 10  | 52   |
| McEvoy 2006 <sup>48</sup>           | 26 | DB-RCT (Clozapine OL) | Schizophrenia (DSM-IV)                             | Non-response to prior atypical antipsychotic treatment                  | Olanzapine      | Oral, daily, 23.4 (7.5-30)       | 19  | 44.3 |
|                                     |    |                       |                                                    |                                                                         | Quetiapine      | Oral, daily, 642.9 (200-800)     | 15  | 37.1 |
|                                     |    |                       |                                                    |                                                                         | Risperidone     | Oral, daily, 4.8 (1.5-6)         | 16  | 37.7 |
|                                     |    |                       |                                                    |                                                                         | Clozapine       | Oral, daily, 332.1 (n.i. – n.i.) | 49  | 39.4 |
| Meltzer 2008 <sup>49</sup>          | 26 | DB-RCT                | Schizophrenia or schizoaffective disorder (DSM-IV) | Treatment-resistance, at least 2 retrospective trials                   | Clozapine       | Oral, daily, 564 (300-900)       | 21  | 37.2 |
|                                     |    |                       |                                                    |                                                                         | Olanzapine      | Oral, daily, 33.6 (25-45)        | 19  | 36.4 |
| Mercer 1997 <sup>50</sup>           | 9  | SB-RCT                | Schizophrenia (DSM-III-R)                          | Treatment-resistance                                                    | Chlorpromazine  | Oral, daily, 500 (50-850)        | 12  | 37.3 |
|                                     |    |                       |                                                    |                                                                         | Risperidone     | Oral, daily, 8 (4-16)            | 15  | 42.5 |
| Meyer-Lindenberg 1997 <sup>51</sup> | 6  | DB-RCT                | Schizophrenia (DSM-III-R)                          | Treatment-resistance or intolerance, at least 2 retrospective trials    | Clozapine       | Oral, daily, 300 (150-450)       | 25  | 33.2 |
|                                     |    |                       |                                                    |                                                                         | Zotepine        | Oral, daily, 300 (150-450)       | 25  | 33.7 |
| Moresco 2004 <sup>52</sup>          | 8  | DB-RCT                | Schizophrenia (DSM-IV)                             | Treatment-resistance, at least 2 retrospective trials                   | Clozapine       | Oral, daily, 325.4 (300-400)     | 12  | 38.3 |
|                                     |    |                       |                                                    |                                                                         | Olanzapine      | Oral, daily, 18.3 (15-20)        | 11  | 34.1 |
| Naber 2005 <sup>53</sup>            | 26 | DB-RCT                | Schizophrenia (DSM-IV)                             | Non-response or intolerance, at least 1 retrospective trial             | Clozapine       | Oral, daily, 209.4 (100-400)     | 57  | 35.2 |
|                                     |    |                       |                                                    |                                                                         | Olanzapine      | Oral, daily, 16.2 (5-25)         | 57  | 32.9 |
| Rosenheck 1997 <sup>54</sup>        | 52 | DB-RCT                | Schizophrenia (DSM-III-R)                          | Treatment-resistance, at least 2 retrospective trials                   | Clozapine       | Oral, daily, 552 (100-900)       | 205 | 43.2 |
|                                     |    |                       |                                                    |                                                                         | Haloperidol     | Oral, daily, 28 (5-30)           | 218 | 43.9 |
| Sacchetti 2009 <sup>55</sup>        | 18 | DB-RCT                | Schizophrenia (DSM-IV)                             | Treatment-resistance or/and intolerance, at least 3                     | Clozapine       | Oral, daily, 345.7 (250-600)     | 74  | 38.3 |
|                                     |    |                       |                                                    |                                                                         | Ziprasidone     | Oral, daily, 130.4 (80-160)      | 73  | 41.6 |

|                                   |    |        |                                                            | retrospective trials                                                                          |                 |                                 |    |       |
|-----------------------------------|----|--------|------------------------------------------------------------|-----------------------------------------------------------------------------------------------|-----------------|---------------------------------|----|-------|
| Schiele 1961, 06602 <sup>56</sup> | 16 | DB-RCT | Schizophrenia (clinical diagnosis)                         | Treatment-resistance                                                                          | Chlorpromazine  | Oral, daily, 894 (200-1000)     | 20 | 40.6  |
|                                   |    |        |                                                            |                                                                                               | Placebo         | Oral, daily                     | 20 | 40.6  |
|                                   |    |        |                                                            |                                                                                               | Thioridazine    | Oral, daily, 958 (200-1000)     | 20 | 40.6  |
|                                   |    |        |                                                            |                                                                                               | Trifluoperazine | Oral, daily, 35 (10-50)         | 20 | 40.6  |
| Schlosberg 1978 <sup>6</sup>      | 52 | DB-RCT | Schizophrenia (clinical diagnosis)                         | Treatment-resistance                                                                          | Fluphenazine    | Depot, 4 weeks, 27.5 (6.25-50)  | 30 | 43    |
|                                   |    |        |                                                            |                                                                                               | Pipotiazine     | Depot, 4 weeks, 27.5 (6.25-50)  | 30 | 45    |
|                                   |    |        |                                                            |                                                                                               | Placebo         | Depot                           | 15 | 39.87 |
| Schooler 2016 <sup>57</sup>       | 29 | DB-RCT | Schizophrenia or schizoaffective disorder (DSM-IV)         | Partial or poor response, at least 2 retrospective trials                                     | Clozapine       | Oral, daily, 456.7 (500-800)    | 53 | 42    |
|                                   |    |        |                                                            |                                                                                               | Risperidone     | Oral, daily, 6.8 (6-16)         | 54 | 42    |
| See 1999 <sup>58</sup>            | 5  | DB-RCT | Schizophrenia (DSM-IV)                                     | Partial response to typical antipsychotics, at least 1 retrospective and 1 prospective trials | Haloperidol     | Oral, daily, n.i. (15-30)       | 10 | 37.7  |
|                                   |    |        |                                                            |                                                                                               | Risperidone     | Oral, daily, n.i. (4-6)         | 10 | 33.5  |
| Shalev 1993 <sup>59</sup>         | 4  | SB-RCT | Schizophrenia (DSM-III)                                    | Treatment-resistance                                                                          | Haloperidol     | Oral, daily, 29.3 (n.i. – n.i.) | 18 | 33    |
|                                   |    |        |                                                            |                                                                                               | Perphenazine    | Oral, daily, 35.8 (n.i. – n.i.) | 21 | 33    |
|                                   |    |        |                                                            |                                                                                               | Levomepromazine | Oral, daily, 379 (n.i. – n.i.)  | 21 | 33    |
| Shaw 2006 <sup>60</sup>           | 8  | DB-RCT | Schizophrenia (DSM-IV)                                     | Insufficient response, at least 2 retrospective trials                                        | Clozapine       | Oral, daily, 327 (150-500)      | 12 | 11.7  |
|                                   |    |        |                                                            |                                                                                               | Olanzapine      | Oral, daily, 18.1 (5-20)        | 13 | 12.8  |
| Sirota 2006 <sup>61</sup>         | 12 | SB-RCT | Schizophrenia (DSM-IV)                                     | Inadequate response, at least 2 retrospective trials                                          | Olanzapine      | Oral, daily, 16 (5-20)          | 21 | 36.2  |
|                                   |    |        |                                                            |                                                                                               | Quetiapine      | Oral, daily, 637.2 (200-800)    | 19 | 38.3  |
| Smith 2001 <sup>62</sup>          | 8  | DB-RCT | Schizophrenia or schizoaffective psychosis (criteria n.i.) | Poor clinical response, at least 2 retrospective trials                                       | Haloperidol     | Oral, daily, 37.9 (5-40)        | 18 | 43    |
|                                   |    |        |                                                            |                                                                                               | Olanzapine      | Oral, daily, 19.9 (5-20)        | 20 | 43    |
| Suzuki 2007 <sup>63</sup>         | 4  | OL-RCT | Schizophrenia (DSM-IV)                                     | Non-response to 1 prospective trial                                                           | Olanzapine      | Oral, daily, n.i. (n.i. - 20)   | 15 | 44.9  |
|                                   |    |        |                                                            |                                                                                               | Quetiapine      | Oral, daily, n.i. (n.i. - 750)  | 10 | 44.9  |
|                                   |    |        |                                                            |                                                                                               | Risperidone     | Oral, daily, n.i. (n.i. - 12)   | 12 | 44.9  |

|                              |    |        |                                                    |                                                                         |                |                              |    |      |
|------------------------------|----|--------|----------------------------------------------------|-------------------------------------------------------------------------|----------------|------------------------------|----|------|
| Tollefson 2001 <sup>64</sup> | 18 | DB-RCT | Schizophrenia (DSM-IV)                             | Treatment-resistance, at least 2 retrospective trials                   | Clozapine      | Oral, daily, 303.6 (200-600) | 90 | 38.6 |
|                              |    |        |                                                    |                                                                         | Olanzapine     | Oral, daily, 20.5 (15-25)    | 90 | 38.6 |
| Toru 1972 <sup>65</sup>      | 8  | DB-RCT | Schizophrenia (clinical diagnosis)                 | Non-response to conventional psychotropic                               | Chlorpromazine | Oral, daily, n.i. (150-600)  | 37 | 35   |
|                              |    |        |                                                    |                                                                         | Sulpiride      | Oral, daily, n.i. (300-1200) | 38 | 35   |
| Volavka 2002 <sup>66</sup>   | 14 | DB-RCT | Schizophrenia or schizoaffective disorder (DSM-IV) | Suboptimal response, at least 1 retrospective trial                     | Clozapine      | Oral, daily, 526.6 (200-800) | 40 | 42.6 |
|                              |    |        |                                                    |                                                                         | Haloperidol    | Oral, daily, 25.7 (10-30)    | 37 | 37.3 |
|                              |    |        |                                                    |                                                                         | Olanzapine     | Oral, daily, 30.4 (10-40)    | 39 | 41   |
|                              |    |        |                                                    |                                                                         | Risperidone    | Oral, daily, 11.6 (4-16)     | 41 | 42.9 |
| Wahlbeck 2000 <sup>67</sup>  | 10 | SB-RCT | Schizophrenia (DSM-IV)                             | Treatment-resistance, at least 2 retrospective and 1 prospective trials | Clozapine      | Oral, daily, 385 (25-600)    | 11 | 35.7 |
|                              |    |        |                                                    |                                                                         | Risperidone    | Oral, daily, 7.8 (2-10)      | 9  | 36.8 |
| Wirshing 1999 <sup>68</sup>  | 8  | DB-RCT | Schizophrenia (DSM-III-R)                          | Treatment-resistance or intolerance, at least 3 retrospective trials    | Haloperidol    | Oral, daily, 19.4 (5-30)     | 33 | 40   |
|                              |    |        |                                                    |                                                                         | Risperidone    | Oral, daily, 7.5 (3-15)      | 34 | 41   |

## 5.2 Characteristics and references of specific studies without usable data

| Study                         | Duration (weeks) | Study Design | Diagnosis                                                                     | Definition of treatment-resistant                                                             | Intervention   | Application, interval, mean dose in mg (range) | Randomized N | Mean age |
|-------------------------------|------------------|--------------|-------------------------------------------------------------------------------|-----------------------------------------------------------------------------------------------|----------------|------------------------------------------------|--------------|----------|
| Addington 1996 <sup>69</sup>  | 6                | DB-RCT       | Schizophrenia (DSM-III-R)                                                     | Treatment-resistance                                                                          | Risperidone    | Oral, daily, n.i. (6-10)                       | n.i.         | n.i.     |
|                               |                  |              |                                                                               |                                                                                               | Haloperidol    | Oral, daily, n.i. (10-15)                      | n.i.         | n.i.     |
| Byerly 1999 <sup>70</sup>     | 12               | SB-RCT       | Schizophrenia (criteria n.i.)                                                 | Non-response to olanzapine or risperidone                                                     | Clozapine      | Oral, daily, 300 (300-300)                     | n.i.         | n.i.     |
|                               |                  |              |                                                                               |                                                                                               | Quetiapine     | Oral, daily, 400 (400-400)                     | n.i.         | n.i.     |
| Estrella 1996 <sup>71</sup>   | 104              | OL-RCT       | schizophrenic patients                                                        | Treatment-resistance                                                                          | Clozapine      | Oral, n.i., n.i. (n.i. - n.i.)                 | n.i.         | n.i.     |
|                               |                  |              |                                                                               |                                                                                               | Risperidone    | Oral, n.i., n.i. (n.i. - n.i.)                 | n.i.         | n.i.     |
| Green 2004 <sup>72</sup>      | 104              | OL-RCT       | Schizophrenia or schizoaffective disorder (criteria n.i.)                     | Treatment-resistance to 2 trials of typical neuroleptics or 1 trial of atypical antipsychotic | Clozapine      | Oral, n.i., n.i. (n.i. - n.i.)                 | n.i.         | n.i.     |
|                               |                  |              |                                                                               |                                                                                               | Olanzapine     | Oral, n.i., n.i. (n.i. - n.i.)                 | n.i.         | n.i.     |
| Hamilton 1960 <sup>73</sup>   | 8                | DB-RCT       | Schizophrenia (clinical diagnosis)                                            | Treatment-resistance                                                                          | Chlorpromazine | Oral, daily, 300 (300-300)                     | 18           | 38       |
|                               |                  |              |                                                                               |                                                                                               | Placebo        | Oral, daily                                    | 18           | 38       |
| Heres 2022 <sup>74</sup>      | 6                | DB-RCT       | schizophrenia, schizoaffective disorder or schizophreniform disorder (DSM-IV) | Not in remission from 1 prospective trial                                                     | Amisulpride    | Oral, daily, n.i. (600-800)                    | n.i.         | n.i.     |
|                               |                  |              |                                                                               |                                                                                               | Olanzapine     | Oral, daily, n.i. (15-20)                      | n.i.         | n.i.     |
| Heylen 1988 <sup>75</sup>     | 8                | DB-RCT       | Chronic psychosis (clinical diagnosis)                                        | Treatment-resistance                                                                          | Risperidone    | Oral, daily, n.i. (2-20)                       | n.i.         | n.i.     |
|                               |                  |              |                                                                               |                                                                                               | Haloperidol    | Oral, daily, n.i. (2-20)                       | n.i.         | n.i.     |
| Mergl 1999 <sup>76</sup>      | 6                | DB-RCT       | Schizophrenia (criteria n.i.)                                                 | Non-response to typical neuroleptics                                                          | Olanzapine     | Oral, n.i., n.i. (n.i. - n.i.)                 | n.i.         | n.i.     |
|                               |                  |              |                                                                               |                                                                                               | Clozapine      | Oral, n.i., n.i. (n.i. - n.i.)                 | n.i.         | n.i.     |
| Oliemeulen 2000 <sup>77</sup> | 8                | n.i.         | Schizophrenia (DSM-IV)                                                        | Treatment-resistance or intolerance                                                           | Olanzapine     | Oral, n.i., n.i. (n.i. - n.i.)                 | 21           | n.i.     |
|                               |                  |              |                                                                               |                                                                                               | Clozapine      | Oral, n.i., n.i. (n.i. - n.i.)                 | 15           | n.i.     |
| Salganik 1998 <sup>78</sup>   | 10               | DB-RCT       | Schizophrenia (DSM-III-R)                                                     | Treatment-resistance                                                                          | Clozapine      | Oral, n.i., n.i. (n.i. - n.i.)                 | n.i.         | 66.6     |
|                               |                  |              |                                                                               |                                                                                               | Haloperidol    | Oral, n.i., n.i. (n.i. - n.i.)                 | n.i.         | 66.6     |

|                        |    |        |                        |                                        |                |                              |    |       |
|------------------------|----|--------|------------------------|----------------------------------------|----------------|------------------------------|----|-------|
| Teja 1975 <sup>7</sup> | 20 | DB-RCT | Schizophrenia (DSM-II) | Non-response to the various treatments | Chlorpromazine | Oral, daily, n.i. (100-1080) | 14 | 38.01 |
|                        |    |        |                        |                                        | Haloperidol    | Oral, daily, n.i. (2-45)     | 13 | 38.01 |
|                        |    |        |                        |                                        | Placebo        | Oral, daily                  | 10 | 38.01 |

*DB-RCT: double blind randomized controlled trial; DSM: Diagnostic and Statistical Manual of Mental Disorders; ICD: International Statistical Classification of Diseases and Related Health Problems; n.i.: not indicated; OL-RCT: open label randomized controlled trial; SB-RCT: single blind randomized controlled trial.*



## 6 Transitivity assessment

Following the recommendations of Cochrane handbook,<sup>79</sup> we visually inspected the distribution of potential effect modifiers across antipsychotics based on all included studies with at least one available data.

### 6.1 Baseline severity

We converted BPRS-18 baseline scores of studies to PANSS equivalents based on Leucht 2013<sup>80</sup>. Baseline severity ranges from a minimal of 66 in PANSS equivalents to a maximum of 148. However, the PANSS equivalents could be problematic as BPRS versions were not indicated clearly in studies when converting from BPRS to PANSS.

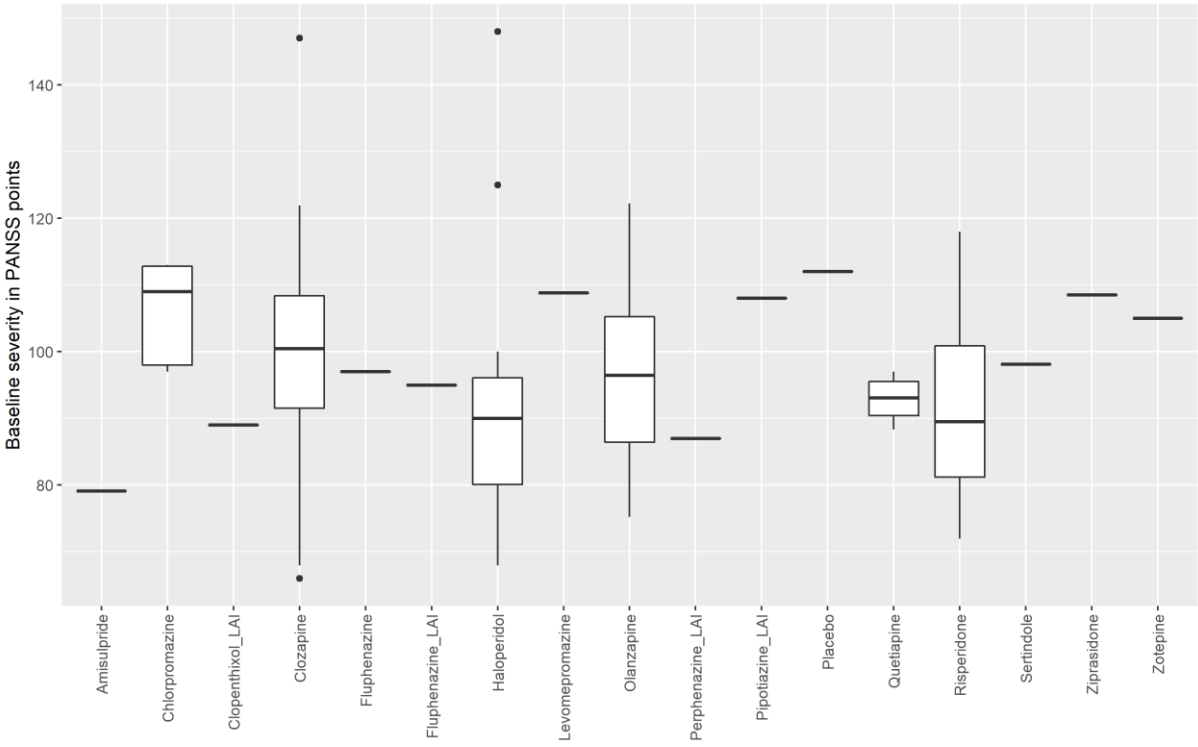

## 6.2 Blinding of outcome assessor

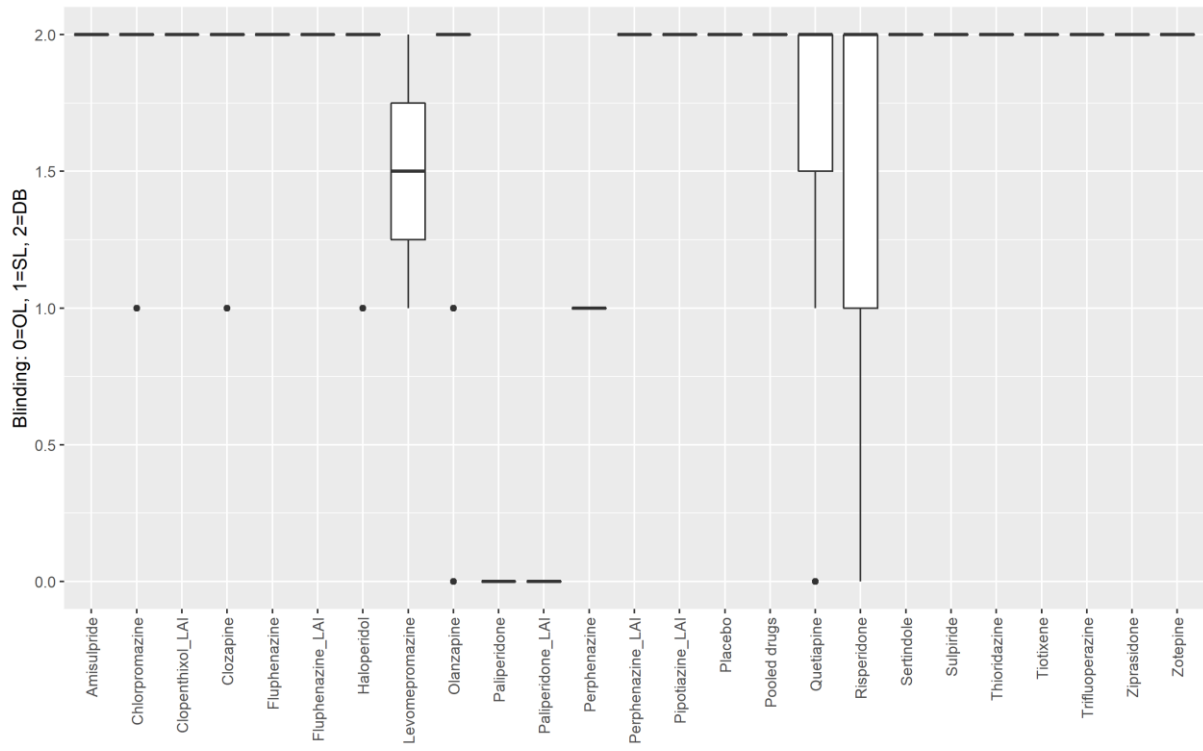

*OL=open-label study; SL=single-blind study; DB=double-blind study*

### 6.3 Treatment-resistance definition

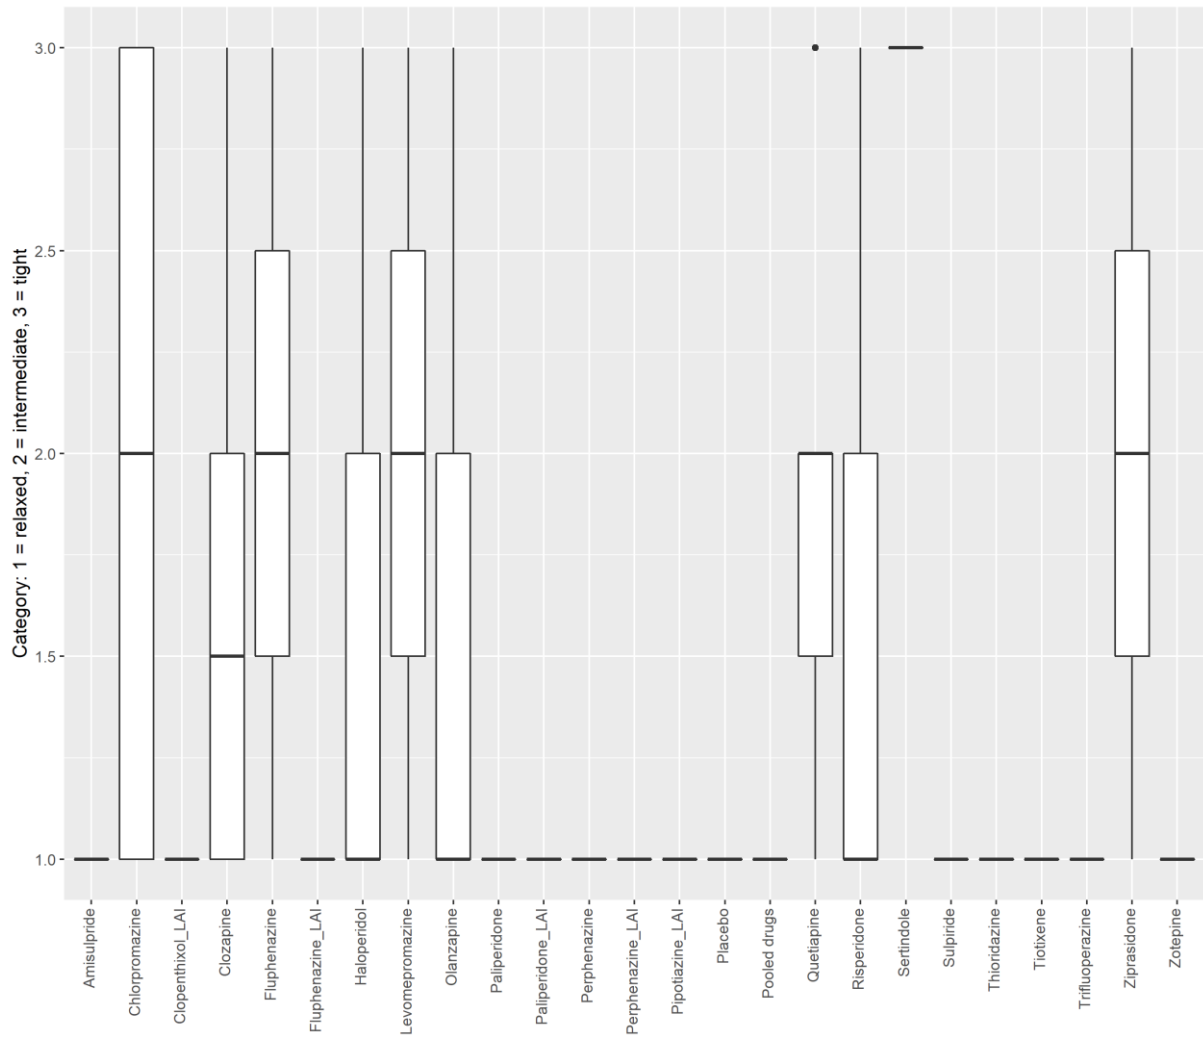

Criteria of treatment-resistance definition is presented in Appendix 12.1.1.

## 6.4 Publication year

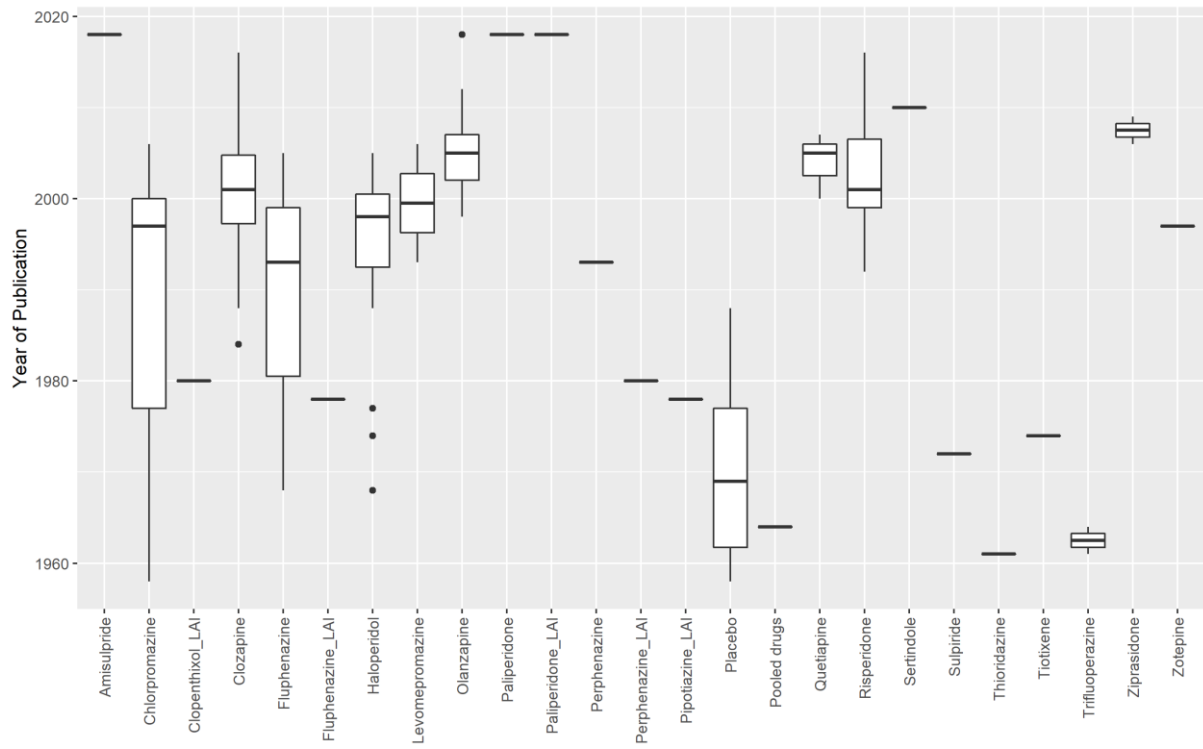

## 6.5 Sample size

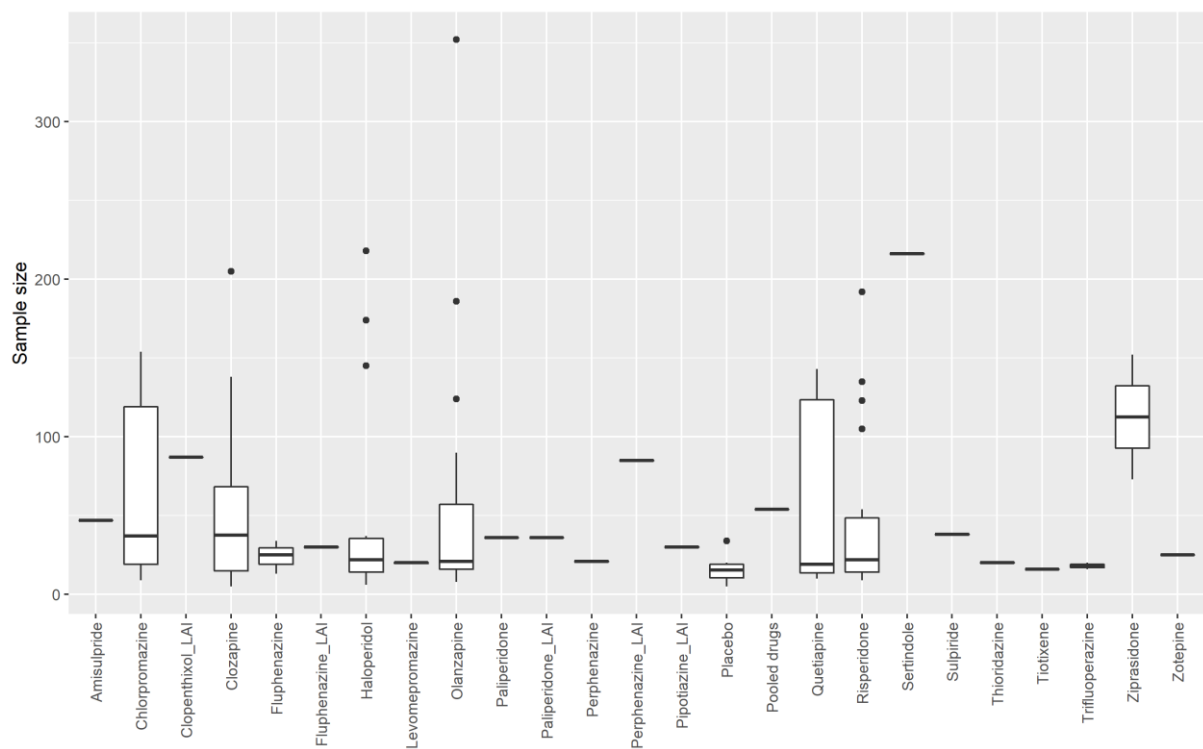

## 6.6 Mean age

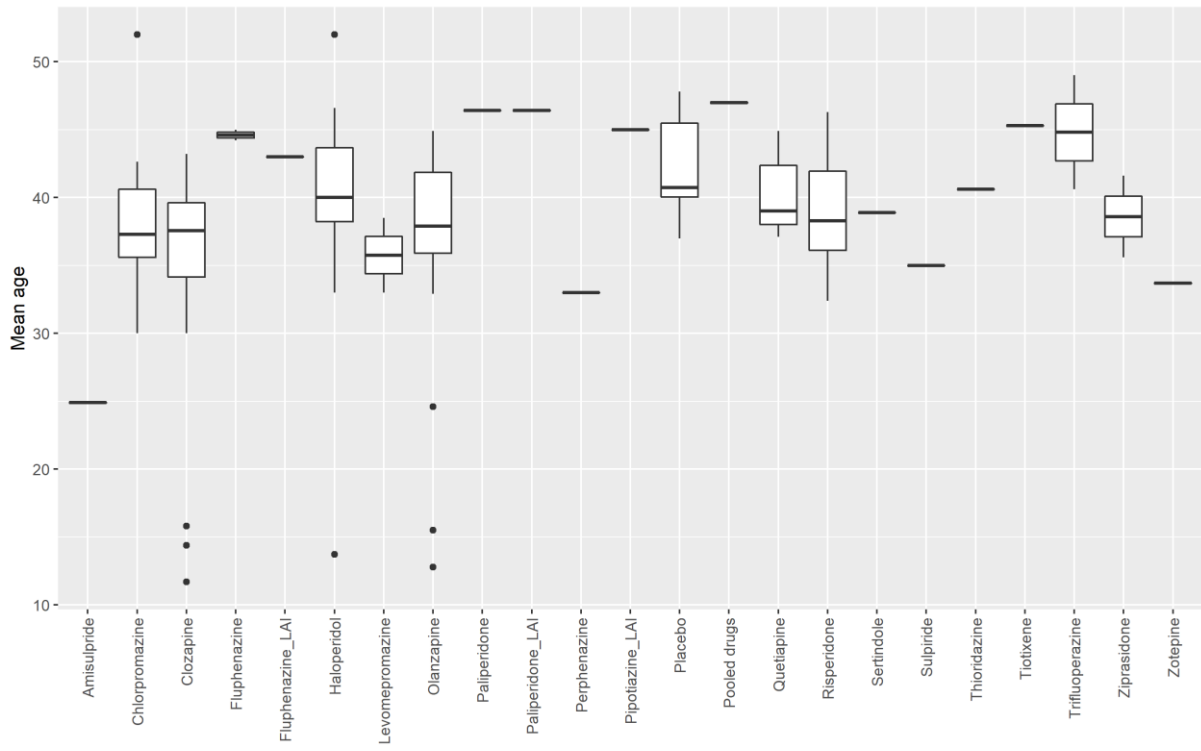

## 6.7 Study duration

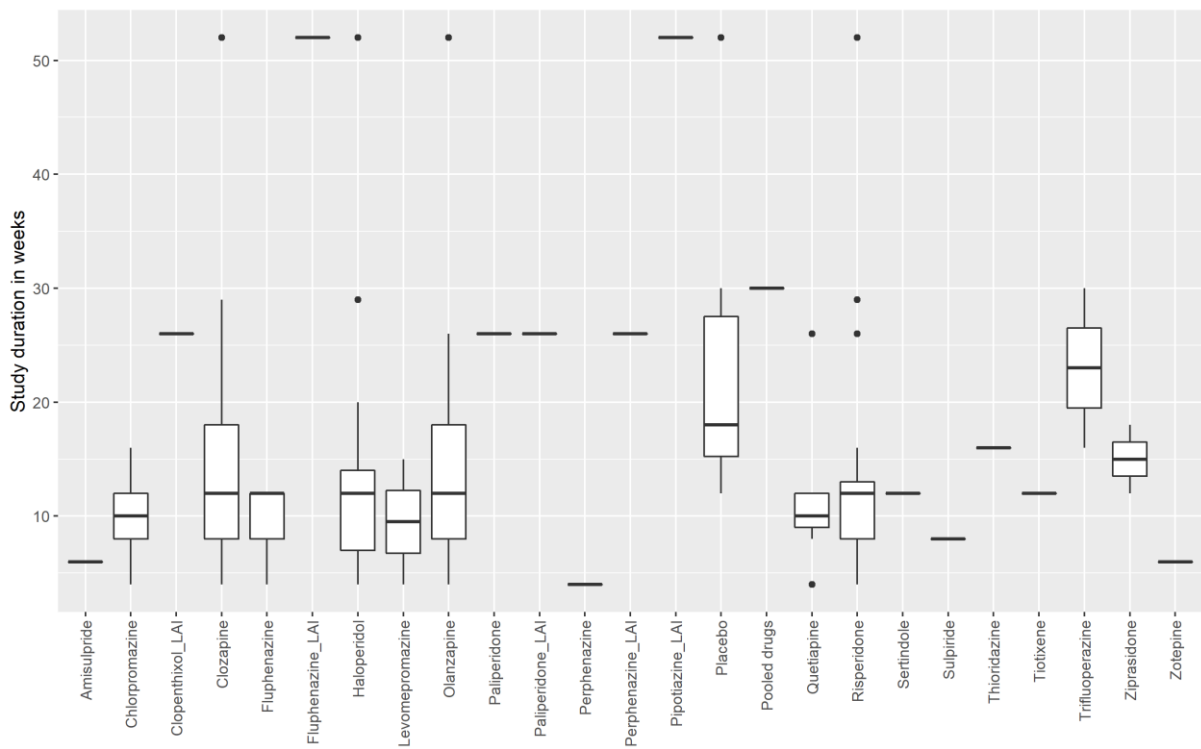

# 7 Forest plots of pairwise meta-analyses of the primary outcome

## 7.1 Pairwise meta-analysis of all antipsychotics

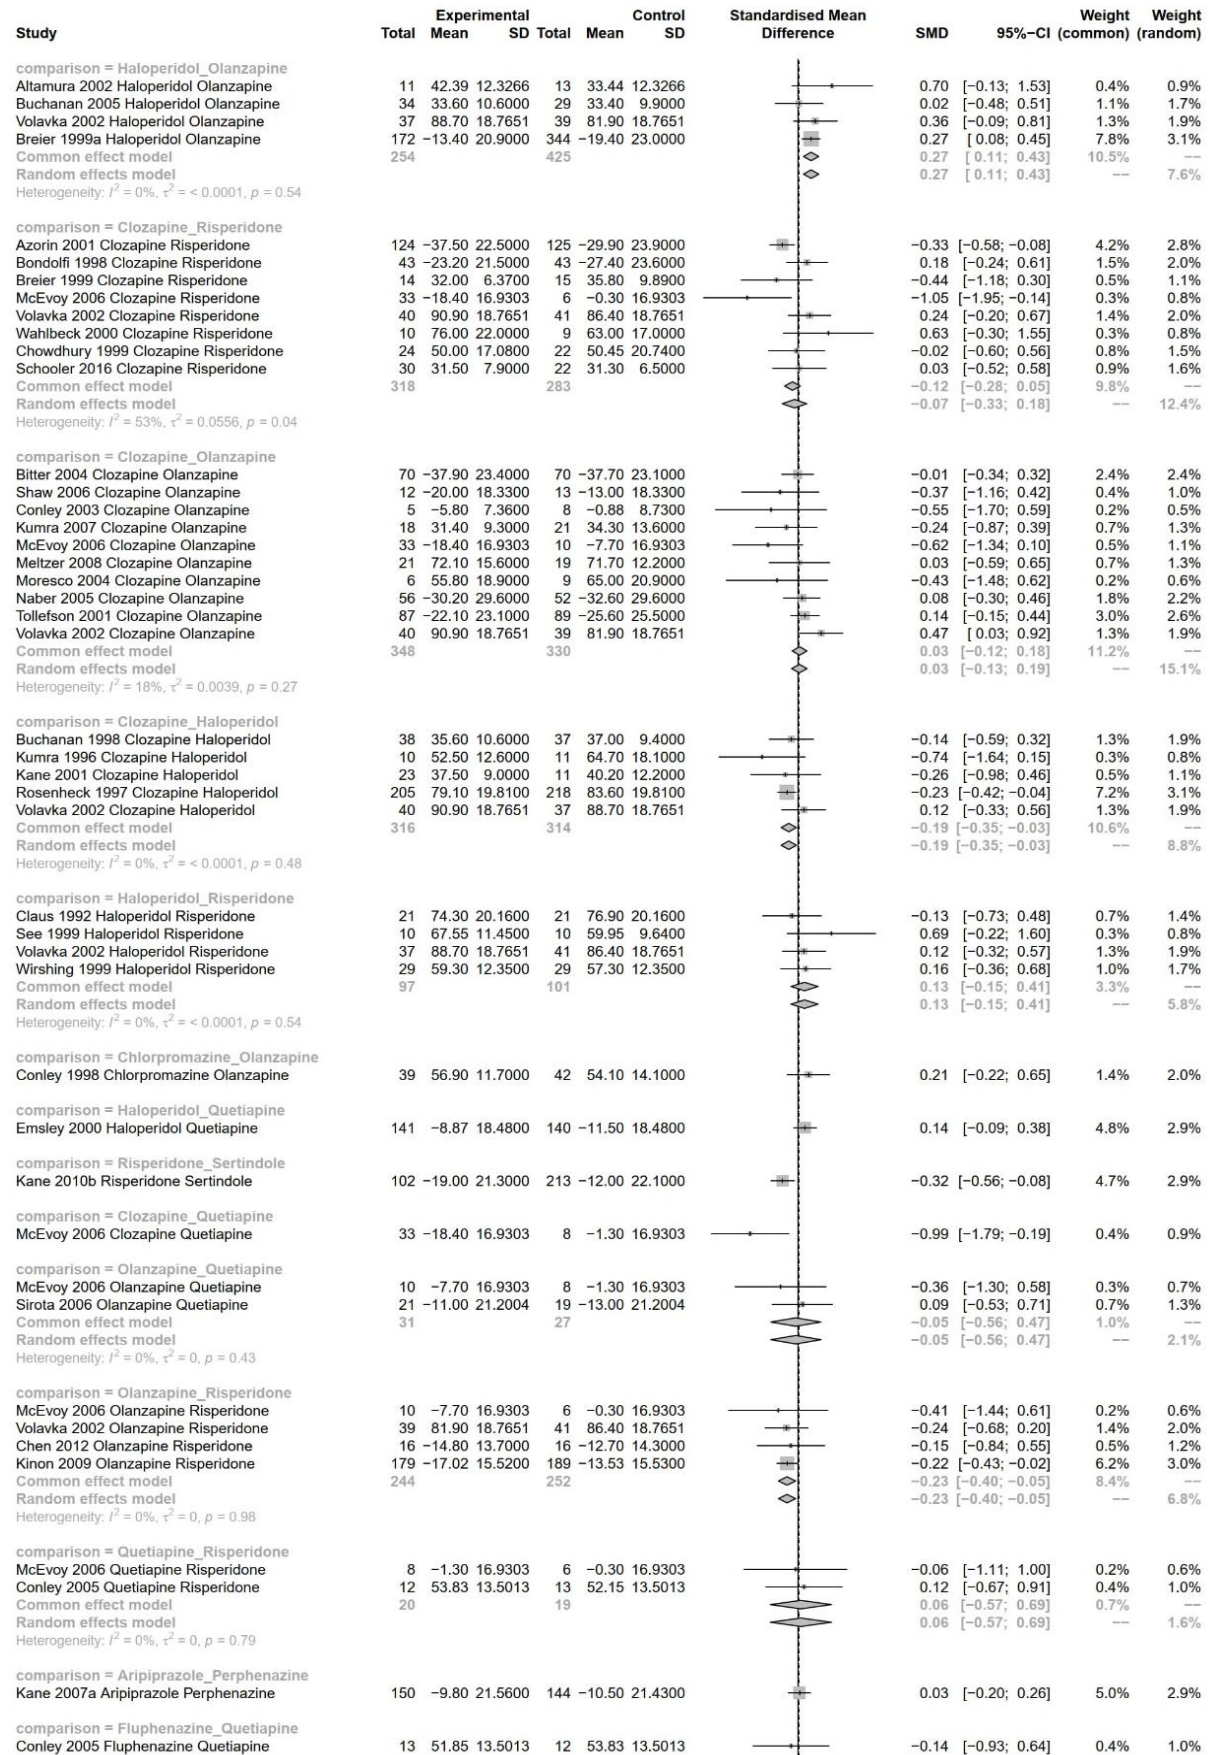



## 7.2 Post-hoc pairwise meta-analysis of first-generation antipsychotics (FGAs) vs. clozapine

Clozapine is better only as FGAs as a group but not as SGAs as a group.

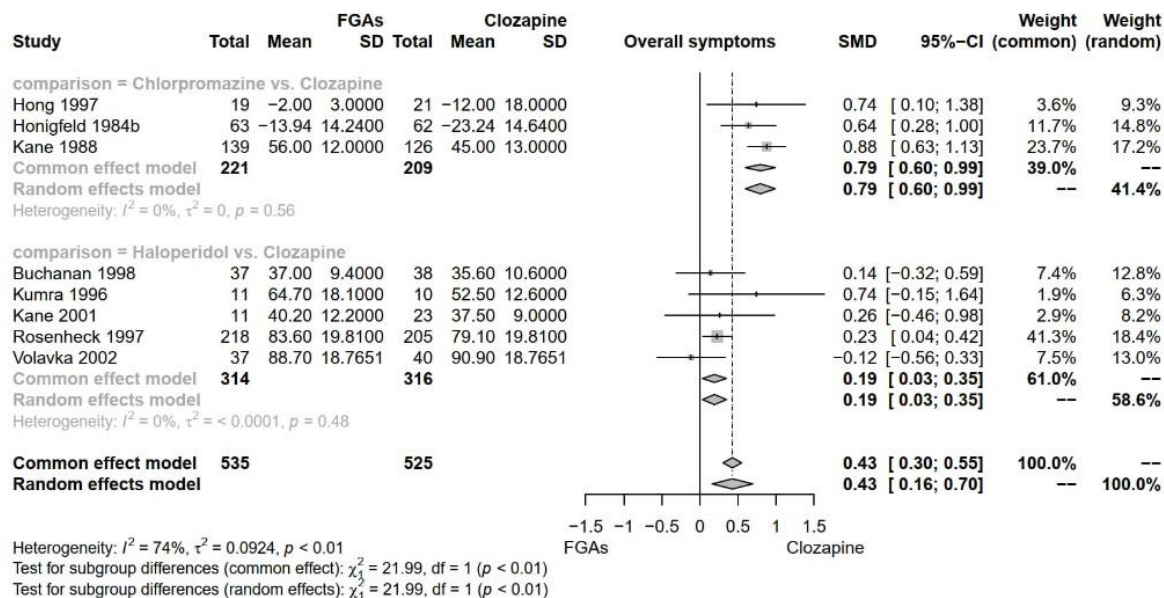



### 7.3 Post-hoc pairwise meta-analysis of second-generation antipsychotics (SGAs) vs. clozapine

Clozapine is better only as FGAs as a group but not as SGAs as a group.

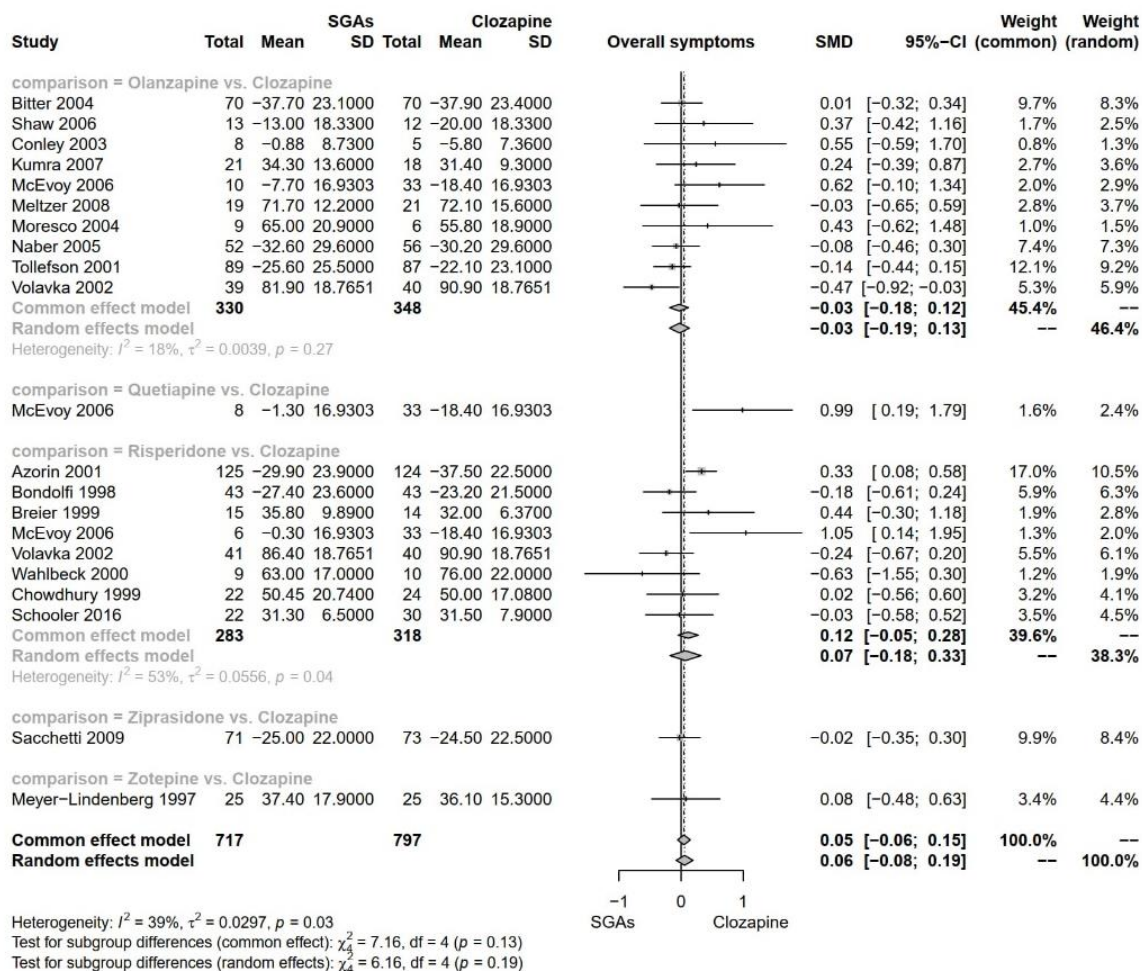

## 8 Results of the network meta-analyses of the secondary outcomes

Each outcome is presented in the order:

- Network plot
- Forest plot of results of network meta-analysis (clozapine as reference)
- League table
- Forest plot of results of pairwise meta-analysis

For the effect size of dichotomous outcomes, we performed the statistical analysis using odds ratios (OR) and not risk ratios (RR), because OR provide more stable estimates of treatment effects across study-conditions with different baseline risks. Therefore, it is recommended for (network-)meta-analysis. However, OR are more difficult to interpret than RR. For specific situations/patients with specific (assumed or known) baseline risks, OR can be transformed to RR or presented as exposure-event-rates (EER) versus control-event-rates (CER).

### **Formula for the transformations:**

$$RR = OR / [(1 - CER) + (OR * CER)]$$

$$EER = RR * CER$$

We present forests plots and league tables with the original results in OR, RR and EER vs. CER below (EER vs. CER in the forest plot only).

# 8.1 Positive symptoms

## Network plot

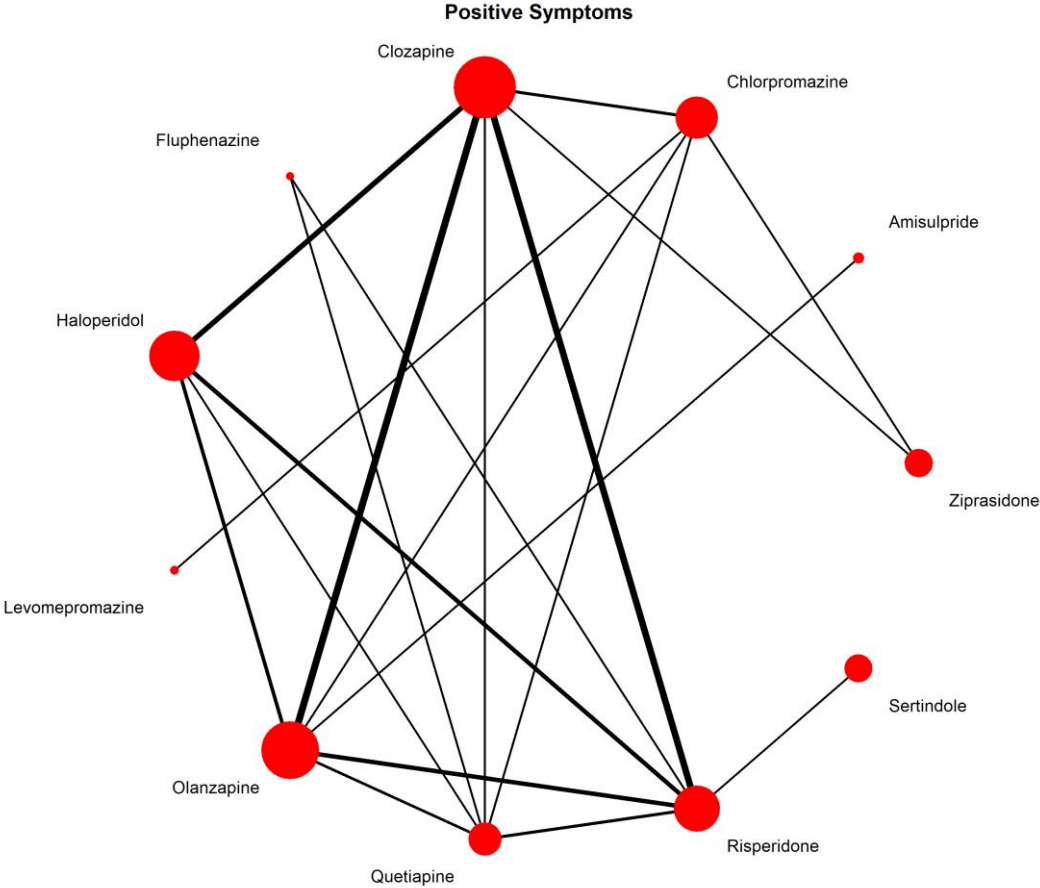

*Lines link treatments with direct comparisons in trials; thickness of lines corresponds to the number of trials evaluating the comparison; size of the nodes corresponds to the number of participants assigned to the treatment.*

**Forest-plot of results of network meta-analysis for antipsychotic drugs versus clozapine**

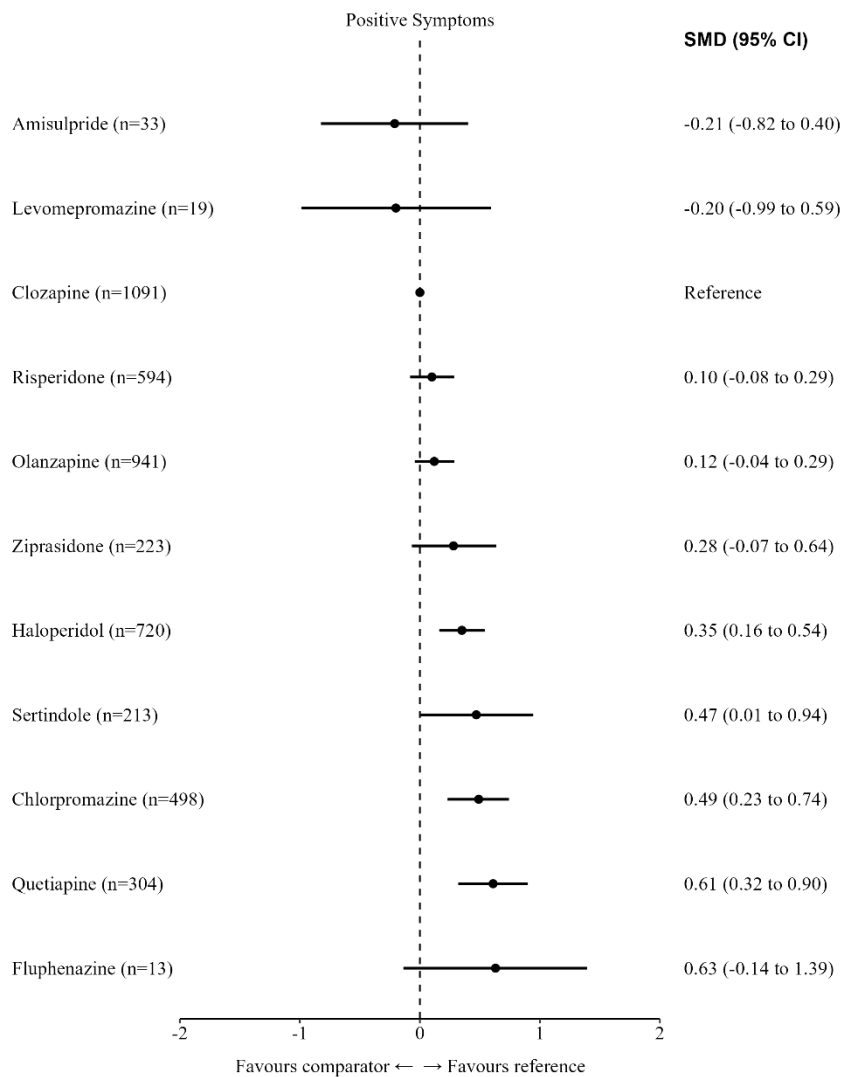

*Effect sizes, measured as standardized mean difference (SMD), are from the network meta-analysis. Order of treatments is according to the mean effect size. Reference is clozapine. The direction of the effect is indicated below the x-axis.*

**League table for the outcome: Positive symptoms**

|                               |                       |                               |                               |                               |                       |                       |                       |                               |                       |                               |
|-------------------------------|-----------------------|-------------------------------|-------------------------------|-------------------------------|-----------------------|-----------------------|-----------------------|-------------------------------|-----------------------|-------------------------------|
| Amisulpride                   | NA                    | NA                            | NA                            | -0.33 (-0.92 to 0.26)         | NA                    | NA                    | NA                    | NA                            | NA                    | NA                            |
| -0.01 (-1.01 to 0.98)         | Levomepromazine       | NA                            | NA                            | NA                            | NA                    | NA                    | NA                    | -0.68 (-1.43 to 0.06)         | NA                    | NA                            |
| -0.21 (-0.82 to 0.40)         | -0.20 (-0.99 to 0.59) | Clozapine                     | -0.06 (-0.28 to 0.17)         | -0.11 (-0.31 to 0.10)         | -0.13 (-0.62 to 0.35) | -0.25 (-0.51 to 0.02) | NA                    | <b>-0.72 (-1.10 to -0.34)</b> | NA                    | <b>-0.97 (-1.84 to -0.10)</b> |
| -0.31 (-0.94 to 0.31)         | -0.30 (-1.10 to 0.51) | -0.10 (-0.29 to 0.08)         | Risperidone                   | 0.10 (-0.21 to 0.40)          | NA                    | -0.24 (-0.58 to 0.10) | -0.37 (-0.80 to 0.06) | NA                            | -0.77 (-1.64 to 0.09) | -0.69 (-1.38 to 0.01)         |
| -0.33 (-0.92 to 0.26)         | -0.32 (-1.12 to 0.48) | -0.12 (-0.29 to 0.04)         | -0.02 (-0.22 to 0.19)         | Olanzapine                    | NA                    | -0.14 (-0.43 to 0.15) | NA                    | -0.35 (-0.92 to 0.22)         | NA                    | -0.54 (-1.13 to 0.04)         |
| -0.50 (-1.20 to 0.20)         | -0.48 (-1.30 to 0.34) | -0.28 (-0.64 to 0.07)         | -0.18 (-0.57 to 0.21)         | -0.16 (-0.54 to 0.21)         | Ziprasidone           | NA                    | NA                    | -0.09 (-0.51 to 0.34)         | NA                    | NA                            |
| -0.56 (-1.19 to 0.06)         | -0.55 (-1.35 to 0.25) | <b>-0.35 (-0.54 to -0.16)</b> | <b>-0.25 (-0.47 to -0.03)</b> | <b>-0.23 (-0.43 to -0.03)</b> | -0.07 (-0.46 to 0.32) | Haloperidol           | NA                    | NA                            | NA                    | 0.09 (-0.34 to 0.52)          |
| -0.69 (-1.45 to 0.07)         | -0.67 (-1.59 to 0.24) | <b>-0.47 (-0.94 to -0.01)</b> | -0.37 (-0.80 to 0.06)         | -0.35 (-0.83 to 0.13)         | -0.19 (-0.77 to 0.39) | -0.12 (-0.61 to 0.36) | Sertindole            | NA                            | NA                    | NA                            |
| <b>-0.70 (-1.35 to -0.05)</b> | -0.68 (-1.43 to 0.06) | <b>-0.49 (-0.74 to -0.23)</b> | <b>-0.38 (-0.68 to -0.08)</b> | <b>-0.36 (-0.64 to -0.09)</b> | -0.20 (-0.54 to 0.14) | -0.13 (-0.43 to 0.16) | -0.01 (-0.54 to 0.51) | Chlorpromazine                | NA                    | -0.31 (-0.75 to 0.13)         |
| -0.84 (-1.81 to 0.13)         | -0.82 (-1.91 to 0.26) | -0.63 (-1.39 to 0.14)         | -0.53 (-1.28 to 0.23)         | -0.51 (-1.27 to 0.26)         | -0.34 (-1.17 to 0.49) | -0.28 (-1.05 to 0.49) | -0.15 (-1.03 to 0.72) | -0.14 (-0.93 to 0.65)         | Fluphenazine          | -0.23 (-1.09 to 0.64)         |
| <b>-0.82 (-1.48 to -0.16)</b> | -0.81 (-1.62 to 0.00) | <b>-0.61 (-0.90 to -0.32)</b> | <b>-0.51 (-0.82 to -0.20)</b> | <b>-0.49 (-0.78 to -0.19)</b> | -0.33 (-0.75 to 0.10) | -0.26 (-0.55 to 0.03) | -0.13 (-0.67 to 0.40) | -0.12 (-0.43 to 0.19)         | 0.02 (-0.74 to 0.78)  | Quetiapine                    |

Treatments are presented in order of efficacy ranking. Results of the network meta-analysis are reported in the left lower half and results of pairwise meta-analyses in the right upper half. Each cell provides the effect estimate and the corresponding 95% credible interval (95% CI) of a comparison (left lower half: treatment in column versus treatment in row; right upper half: treatment in row versus treatment in column). The type of effect size measure is standardized mean difference (SMD). Bold results indicate 95% CI excluding no effect. NA=not available.

## Forest plot of results of pairwise meta-analyses

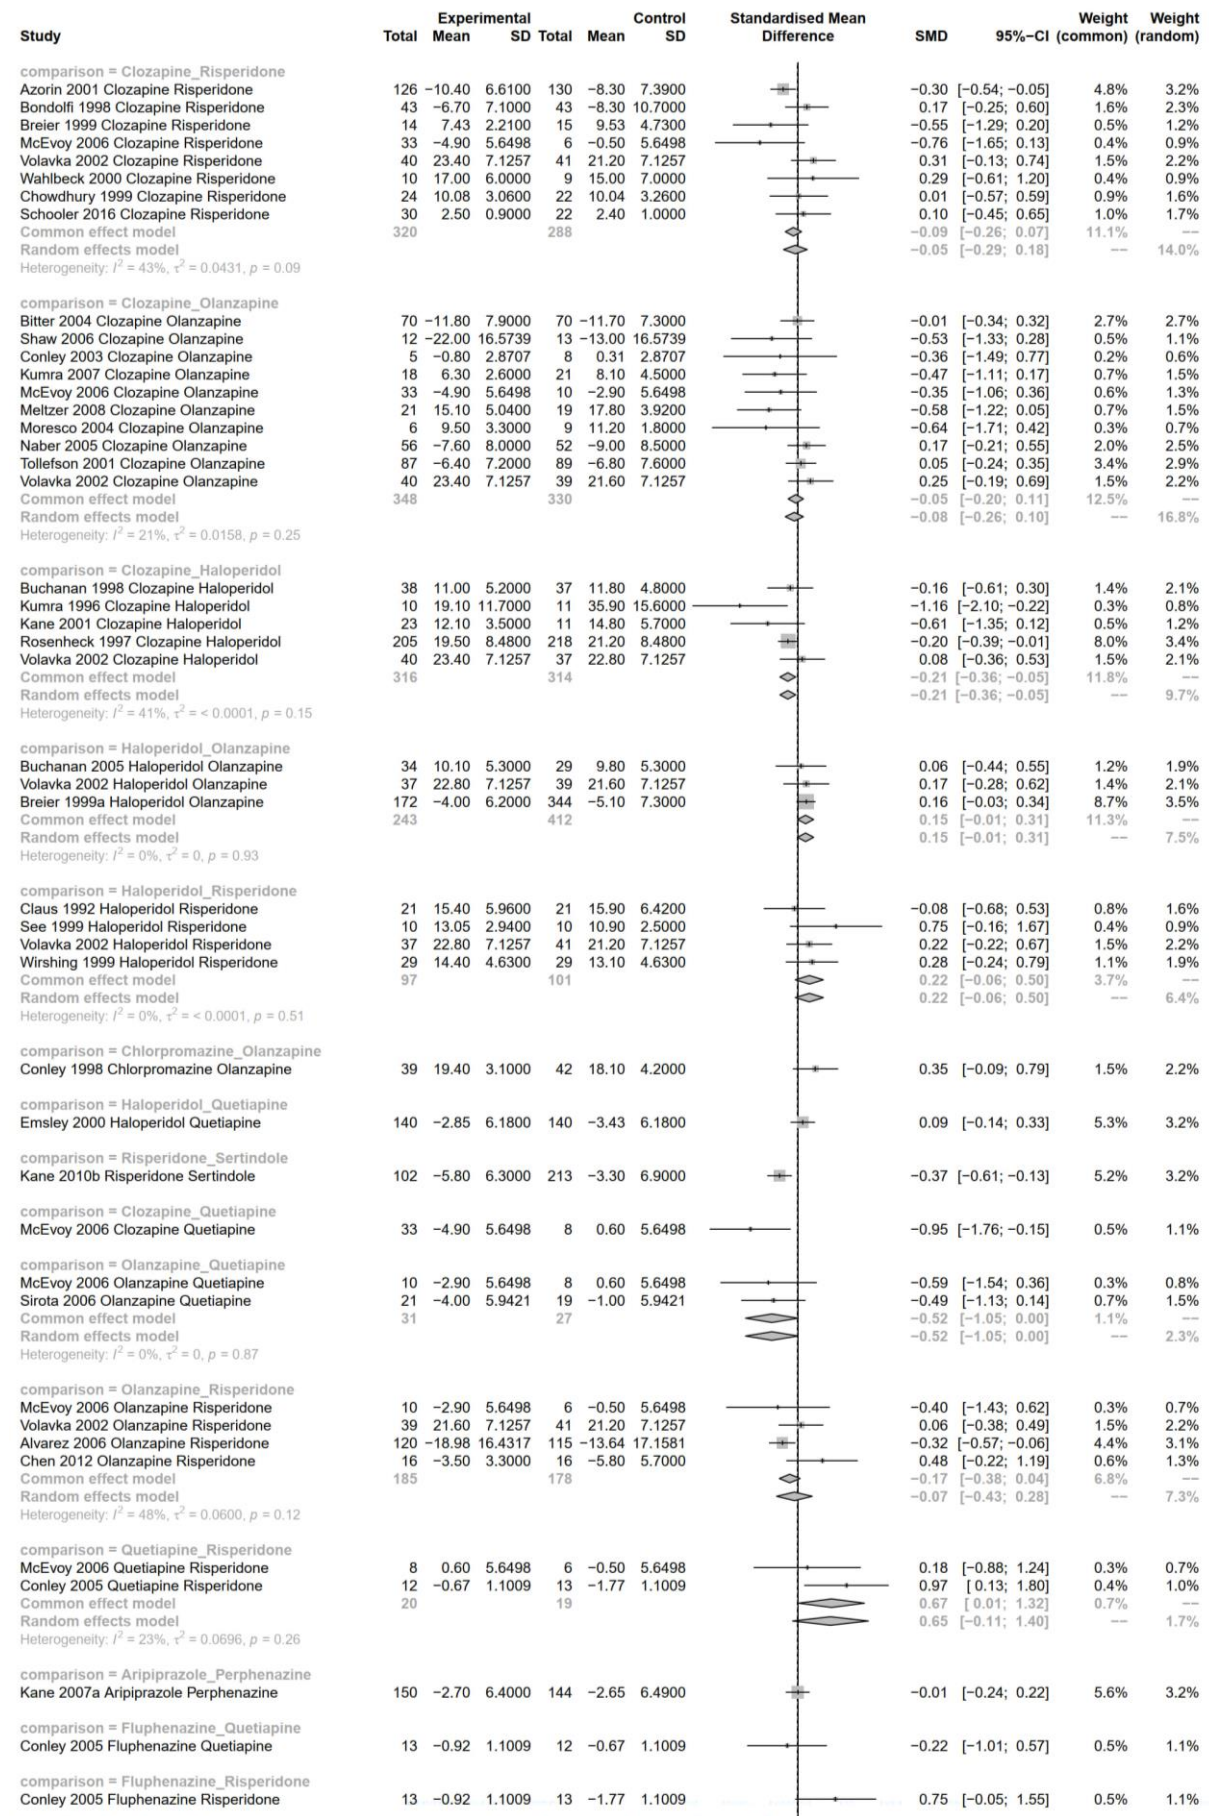



## 8.2 Negative symptoms

### Network plot

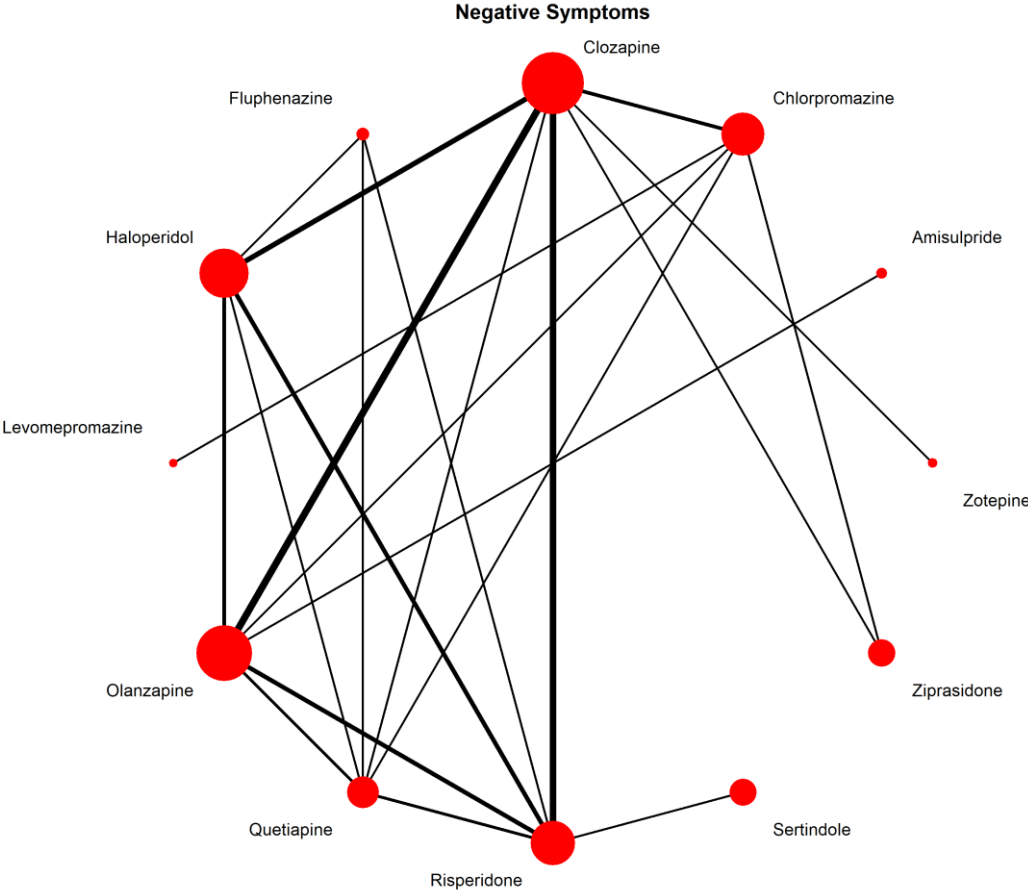

*Lines link treatments with direct comparisons in trials; thickness of lines corresponds to the number of trials evaluating the comparison; size of the nodes corresponds to the number of participants assigned to the treatment.*



**Forest-plot of results of network meta-analysis for antipsychotic drugs versus clozapine**

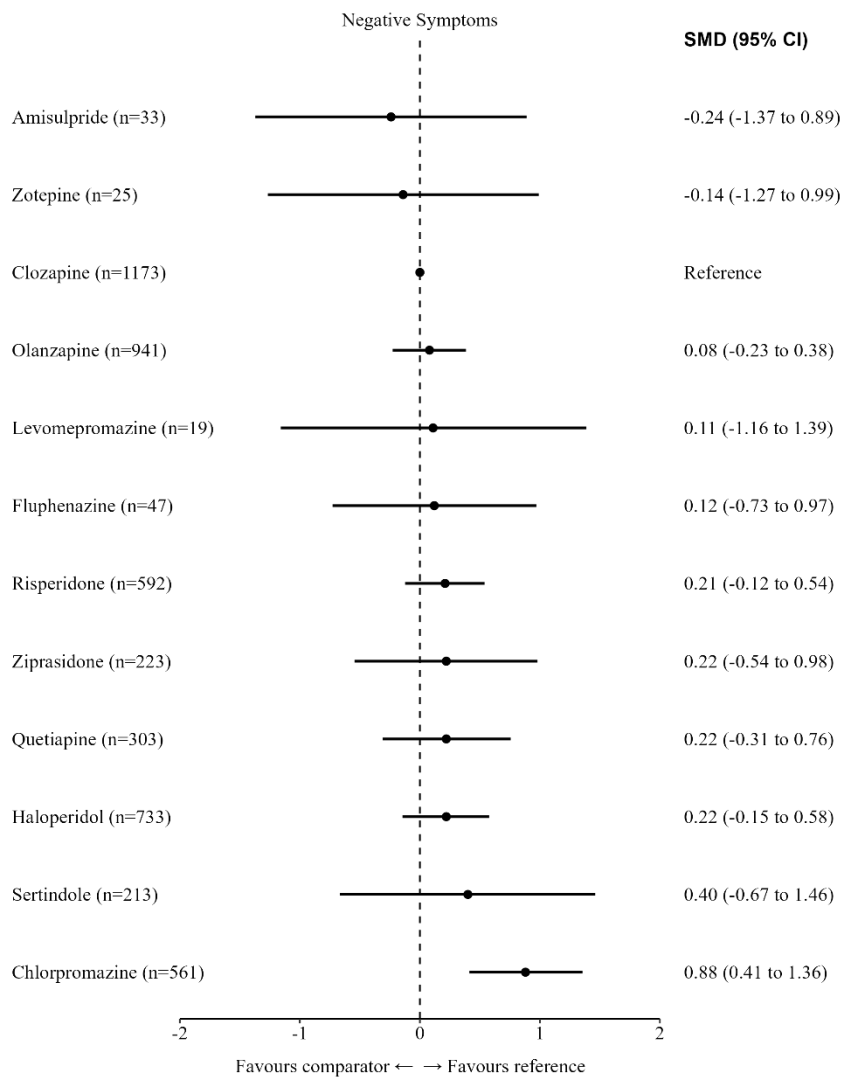

*Effect sizes, measured as standardized mean difference (SMD), are from the network meta-analysis. Order of treatments is according to the mean effect size. Reference is clozapine. The direction of the effect is indicated below the x-axis.*

**League table for the outcome: Negative symptoms**

|                       |                               |                       |                               |                       |                        |                       |                               |                               |                               |                       |                               |
|-----------------------|-------------------------------|-----------------------|-------------------------------|-----------------------|------------------------|-----------------------|-------------------------------|-------------------------------|-------------------------------|-----------------------|-------------------------------|
| Amisulpride           | NA                            | NA                    | -0.32 (-1.41 to 0.77)         | NA                    | NA                     | NA                    | NA                            | NA                            | NA                            | NA                    | NA                            |
| -0.24 (-1.37 to 0.89) | <b>Clozapine</b>              | 0.14 (-0.99 to 1.27)  | -0.06 (-0.43 to 0.31)         | NA                    | NA                     | 0.23 (-0.81 to 1.26)  | -0.75 (-2.00 to 0.51)         | -0.02 (-0.43 to 0.39)         | -0.19 (-0.70 to 0.31)         | NA                    | <b>-1.43 (-2.05 to -0.80)</b> |
| -0.10 (-1.70 to 1.49) | 0.14 (-0.99 to 1.27)          | <b>Zotepine</b>       | NA                            | NA                    | NA                     | NA                    | NA                            | NA                            | NA                            | NA                    | NA                            |
| -0.32 (-1.41 to 0.77) | -0.08 (-0.38 to 0.23)         | -0.22 (-1.39 to 0.95) | <b>Olanzapine</b>             | NA                    | NA                     | NA                    | 0.03 (-0.85 to 0.91)          | -0.36 (-0.93 to 0.22)         | -0.25 (-0.86 to 0.36)         | NA                    | -0.10 (-1.18 to 0.97)         |
| -0.36 (-1.75 to 1.02) | -0.12 (-0.97 to 0.73)         | -0.26 (-1.67 to 1.15) | -0.04 (-0.90 to 0.82)         | <b>Fluphenazine</b>   | NA                     | NA                    | -0.04 (-1.29 to 1.22)         | -0.51 (-1.76 to 0.75)         | 0.12 (-1.06 to 1.29)          | NA                    | NA                            |
| -0.36 (-2.04 to 1.33) | -0.11 (-1.39 to 1.16)         | -0.25 (-1.95 to 1.45) | -0.04 (-1.33 to 1.25)         | 0.01 (-1.50 to 1.52)  | <b>Levomepromazine</b> | NA                    | NA                            | NA                            | NA                            | NA                    | -0.77 (-1.95 to 0.41)         |
| -0.46 (-1.81 to 0.89) | -0.22 (-0.98 to 0.54)         | -0.36 (-1.72 to 1.01) | -0.14 (-0.94 to 0.67)         | -0.10 (-1.22 to 1.03) | -0.10 (-1.51 to 1.30)  | <b>Ziprasidone</b>    | NA                            | NA                            | NA                            | NA                    | -0.24 (-1.25 to 0.76)         |
| -0.46 (-1.68 to 0.75) | -0.22 (-0.76 to 0.31)         | -0.36 (-1.61 to 0.89) | -0.14 (-0.68 to 0.40)         | -0.10 (-0.98 to 0.78) | -0.11 (-1.44 to 1.22)  | -0.01 (-0.90 to 0.89) | <b>Quetiapine</b>             | -0.35 (-1.30 to 0.60)         | -0.12 (-1.13 to 0.89)         | NA                    | -0.28 (-1.29 to 0.74)         |
| -0.45 (-1.60 to 0.70) | -0.21 (-0.54 to 0.12)         | -0.35 (-1.52 to 0.83) | -0.13 (-0.50 to 0.25)         | -0.09 (-0.93 to 0.76) | -0.09 (-1.40 to 1.21)  | 0.01 (-0.81 to 0.83)  | 0.02 (-0.54 to 0.57)          | <b>Risperidone</b>            | 0.08 (-0.50 to 0.66)          | -0.19 (-1.20 to 0.82) | NA                            |
| -0.46 (-1.61 to 0.70) | -0.22 (-0.58 to 0.15)         | -0.35 (-1.54 to 0.83) | -0.14 (-0.53 to 0.25)         | -0.09 (-0.92 to 0.73) | -0.10 (-1.41 to 1.21)  | 0.00 (-0.83 to 0.83)  | 0.01 (-0.54 to 0.56)          | -0.01 (-0.40 to 0.38)         | <b>Haloperidol</b>            | NA                    | NA                            |
| -0.64 (-2.17 to 0.89) | -0.40 (-1.46 to 0.67)         | -0.54 (-2.09 to 1.02) | -0.32 (-1.40 to 0.76)         | -0.28 (-1.59 to 1.04) | -0.28 (-1.93 to 1.37)  | -0.18 (-1.48 to 1.12) | -0.17 (-1.33 to 0.98)         | -0.19 (-1.20 to 0.82)         | -0.18 (-1.27 to 0.90)         | <b>Sertindole</b>     | NA                            |
| -1.13 (-2.33 to 0.08) | <b>-0.88 (-1.36 to -0.41)</b> | -1.02 (-2.25 to 0.20) | <b>-0.81 (-1.32 to -0.29)</b> | -0.76 (-1.70 to 0.18) | -0.77 (-1.95 to 0.41)  | -0.67 (-1.42 to 0.09) | <b>-0.66 (-1.28 to -0.05)</b> | <b>-0.68 (-1.23 to -0.12)</b> | <b>-0.67 (-1.23 to -0.10)</b> | -0.49 (-1.64 to 0.67) | <b>Chlorpromazine</b>         |

Treatments are presented in order of efficacy ranking. Results of the network meta-analysis are reported in the left lower half and results of pairwise meta-analyses in the right upper half. Each cell provides the effect estimate and the corresponding 95% credible interval (95% CI) of a comparison (left lower half: treatment in column versus treatment in row; right upper half: treatment in row versus treatment in column). The type of effect size measure is standardized mean difference (SMD). Bold results indicate 95% CI excluding no effect. NA=not available.

## Forest plot of results of pairwise meta-analyses

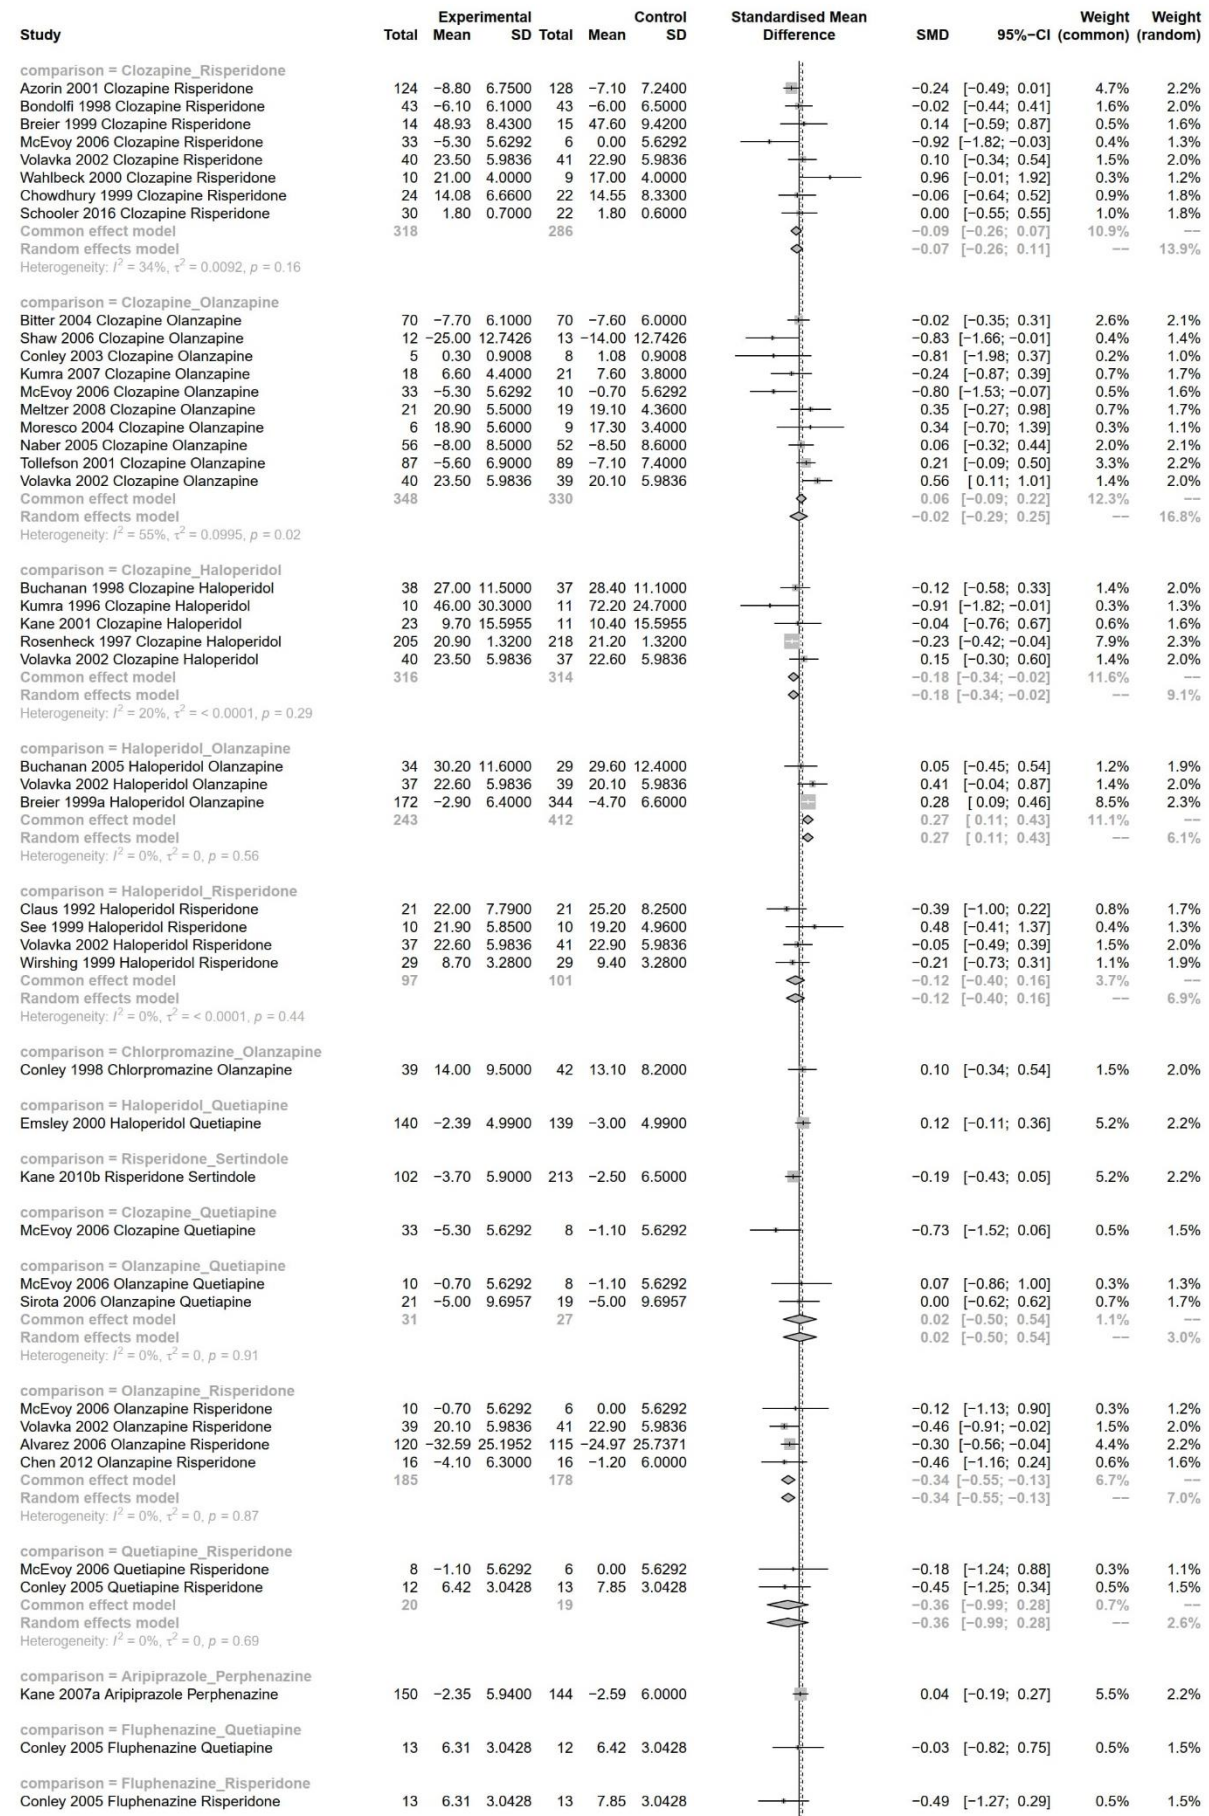

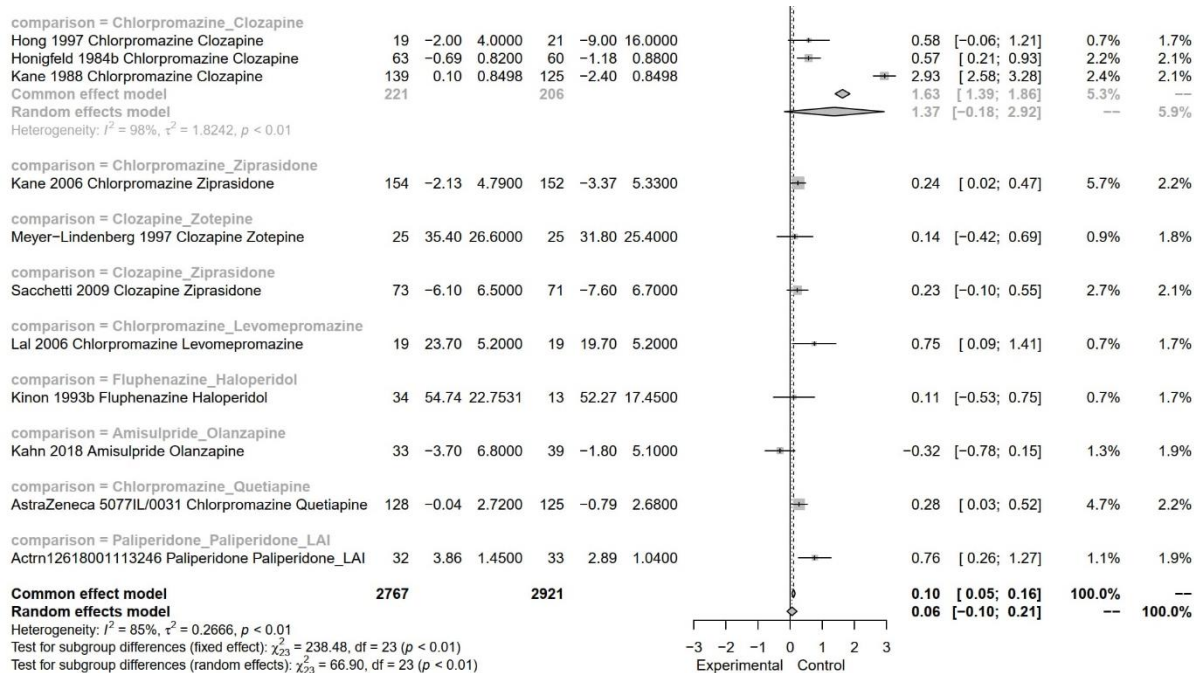

A summary effect size is calculated by pairwise meta-analyses of all studies of a specific comparison. The type of effect size measure is standardized mean difference (SMD).

### 8.3 Response

The following hierarchy of the response definitions were applied: at least 20% reduction of the baseline score of the PANSS, 20% reduction of the BPRS or 20% reduction of any other global schizophrenia rating scale, at least “minimally improved” (score of 3) on the Clinical Global-Improvements-Improvement Scale (CGI). We chose this cutoff because even minimal improvement can be clinically important for patients with treatment-resistant schizophrenia. If none of these definitions was available, we used the original authors’ primary definition.

We transformed the original ORs to RRs and EERs vs. CER assuming the baseline response rate with clozapine of 49% (namely CER). 49% was the average response rate with clozapine across all clozapine-arms in the network meta-analysis, as estimated by a single-arm meta-analysis of proportions (see below).

#### Forest plot of the single arm meta-analysis of response in the clozapine-arm

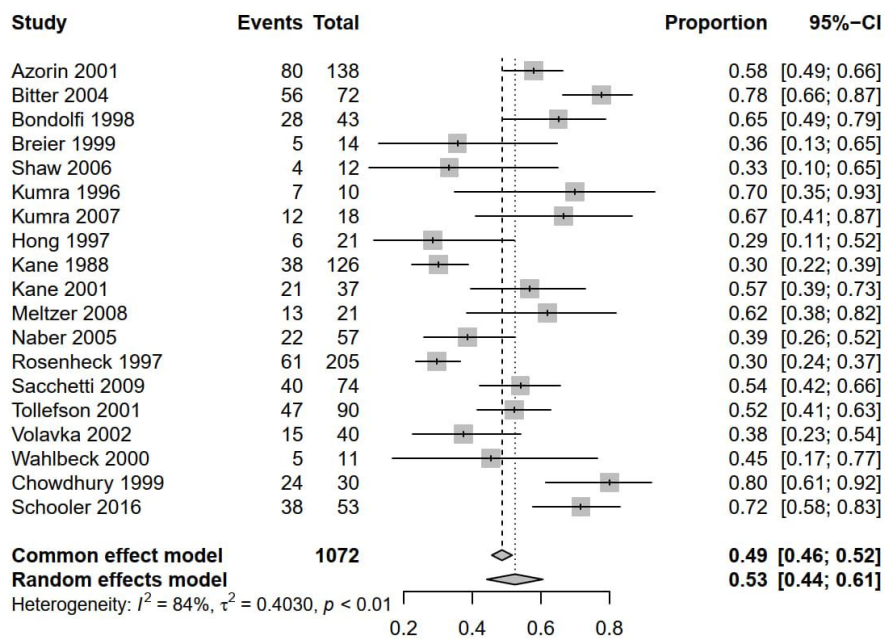

Forest plot of response in all clozapine-arms included in the network meta-analysis. The summary effect size is from a single-arm meta-analysis of proportions.

Because inconsistency of the network was high for response to treatment (12.9% inconsistent comparisons, design-by-treatment interaction test  $p=0.0194$ ), we conducted a pairwise meta-analysis of active antipsychotics versus clozapine and present the results below.

**Forest-plot of results of pairwise meta-analysis for antipsychotic drugs versus clozapine with OR**

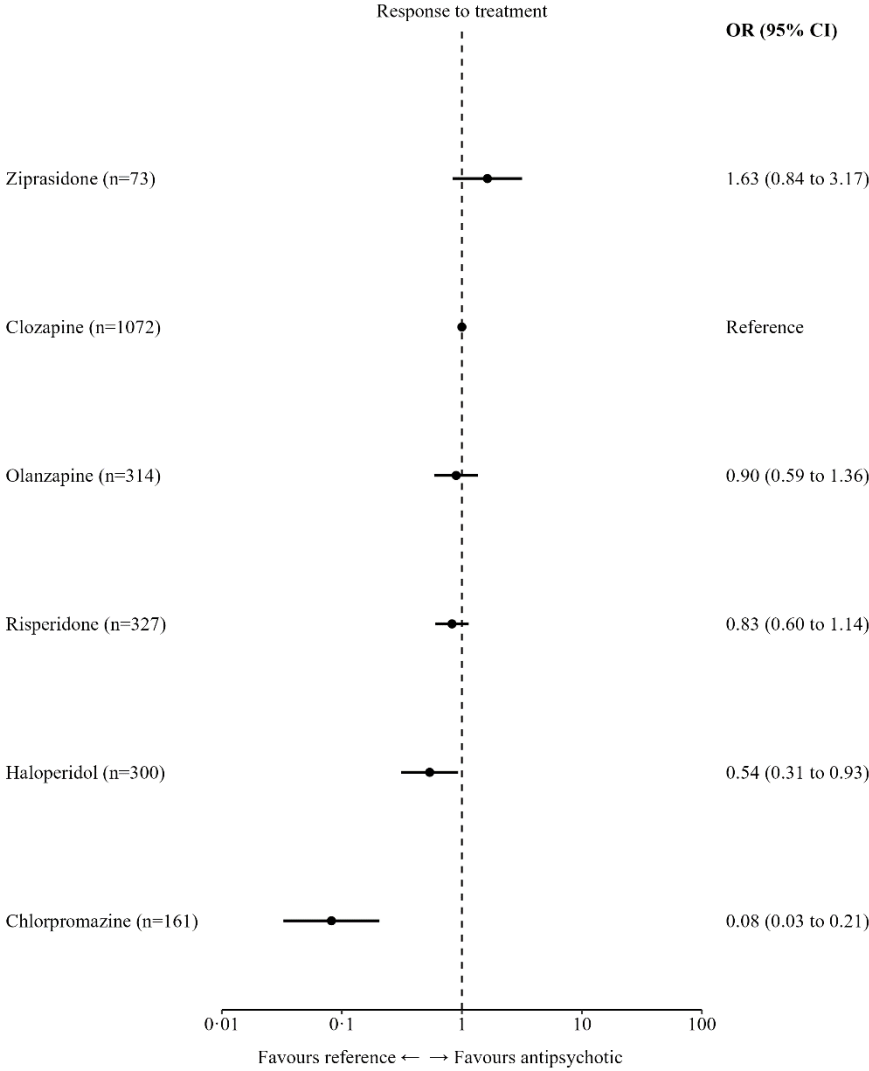

*Effect sizes, measured as odds ratio (OR), are from the network meta-analysis. Order of treatments is according to the mean effect size. Reference is clozapine. The direction of the effect is indicated below the x-axis.*

**Forest-plot of results of pairwise meta-analysis for antipsychotic drugs versus clozapine with RR**

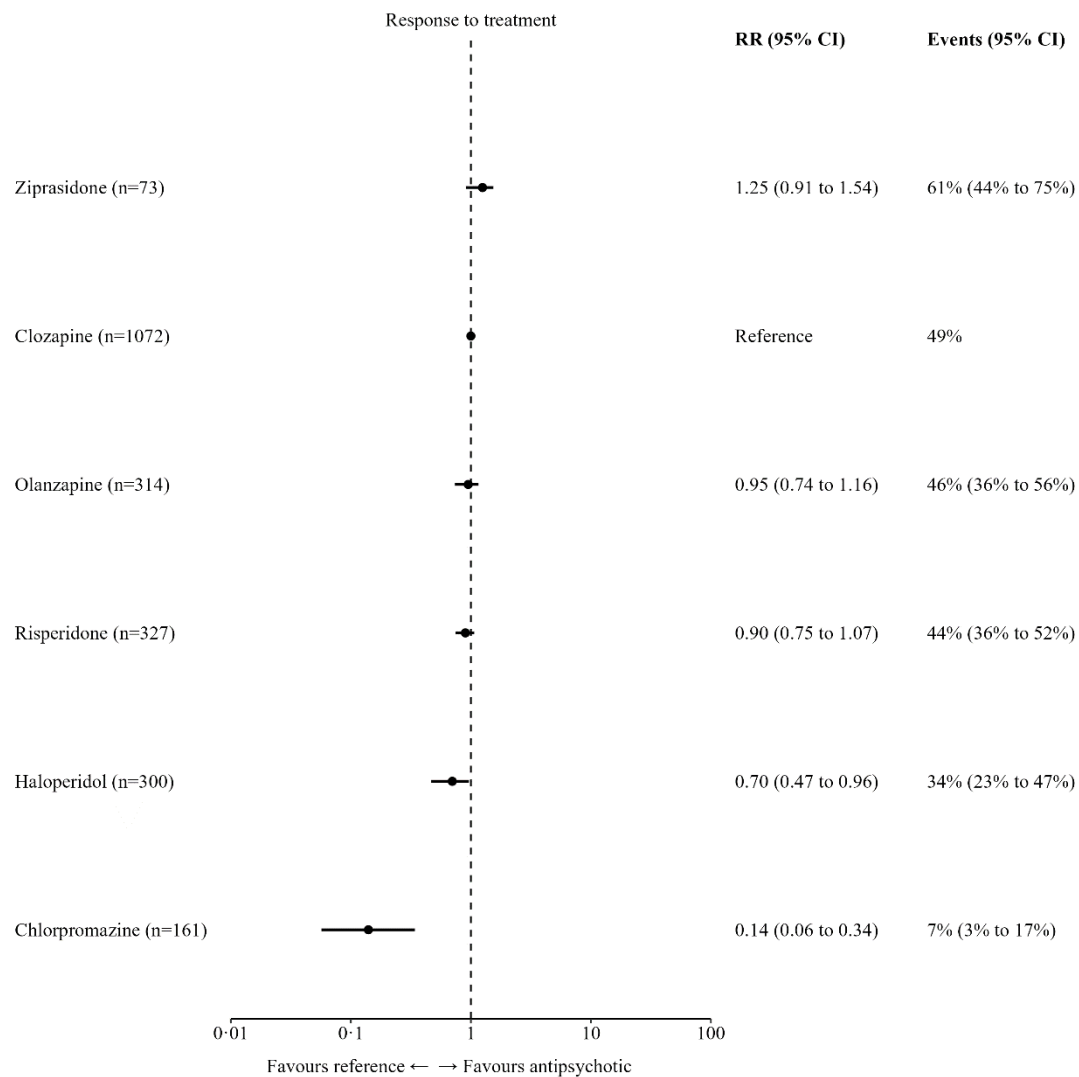

*For this forest plot, we transformed the original OR to RR and exposure events rates (EER, called “events” in the forest plot) using the formula indicated above. Therefore, we used an average response rate with clozapine of 49% as the control event rate (CER).*

*Effect sizes are from the pairwise meta-analysis. Order of treatments is according to the mean effect size. Reference is clozapine. The direction of the effect is indicated below the x-axis.*

We additionally present the results of the network meta-analysis below, which agree with the results of the pairwise meta-analysis, but it should be emphasized that differences between antipsychotics need to be interpreted with caution due to the observed inconsistency.

**Network plot**

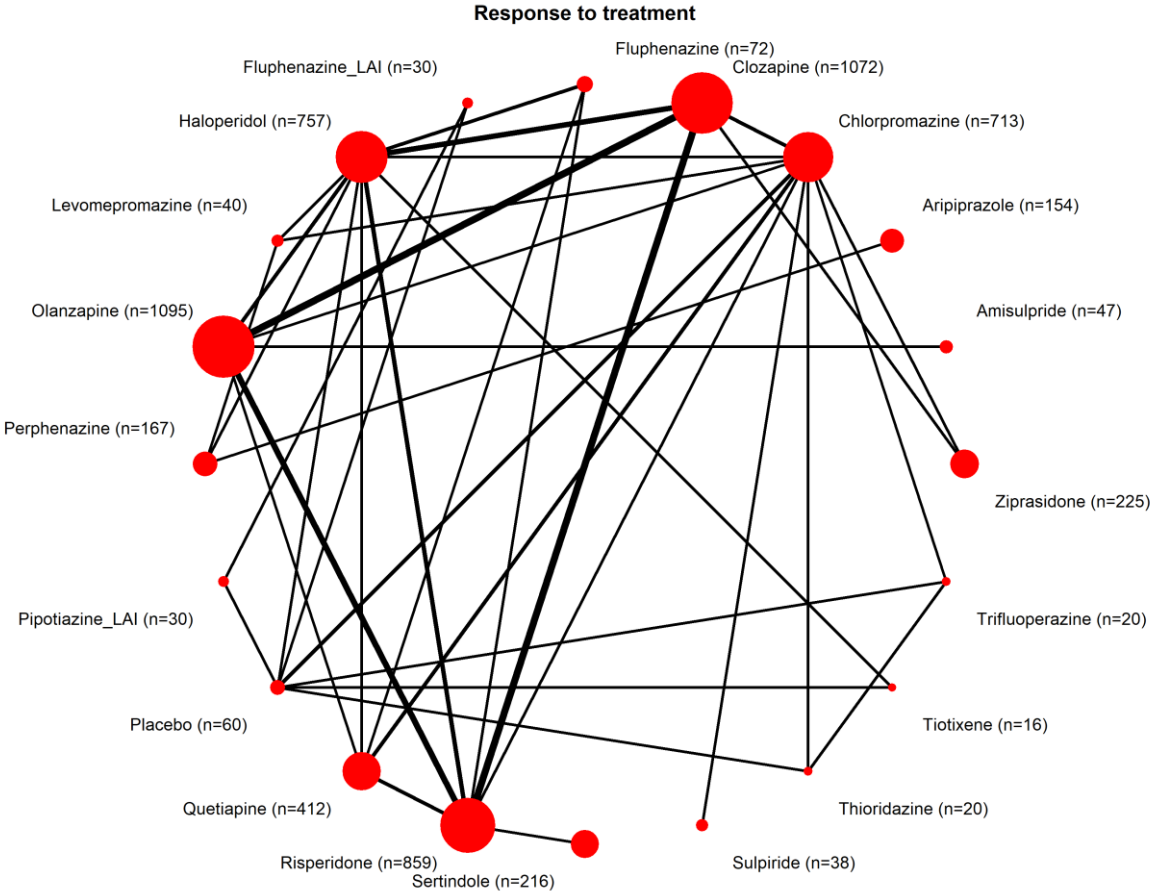

*Lines link treatments with direct comparisons in trials; thickness of lines corresponds to the number of trials evaluating the comparison; size of the nodes corresponds to the number of participants assigned to the treatment.*



**Forest-plot of results of network meta-analysis for antipsychotic drugs versus clozapine**

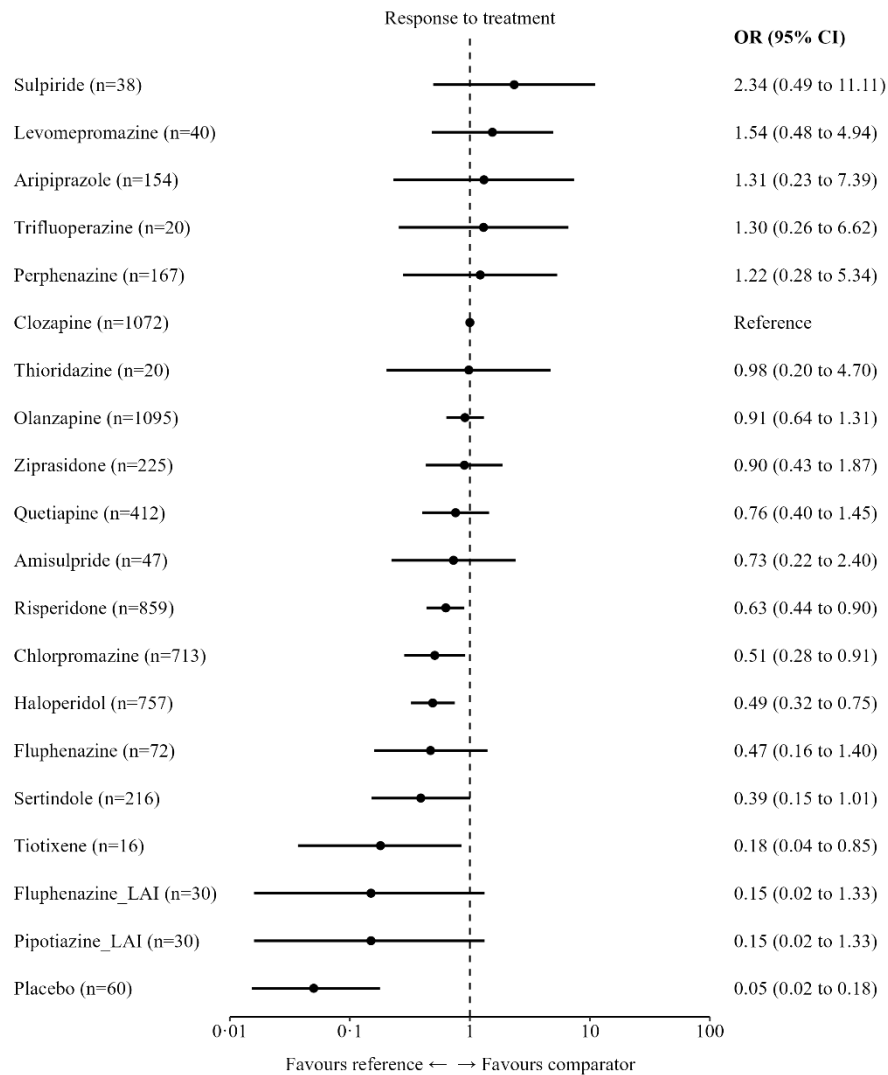

Effect sizes, measured as odds ratio (OR), are from the network meta-analysis. Order of treatments is according to the mean effect size. Reference is clozapine. The direction of the effect is indicated below the x-axis.

## Forest plot with RR and EER versus CER

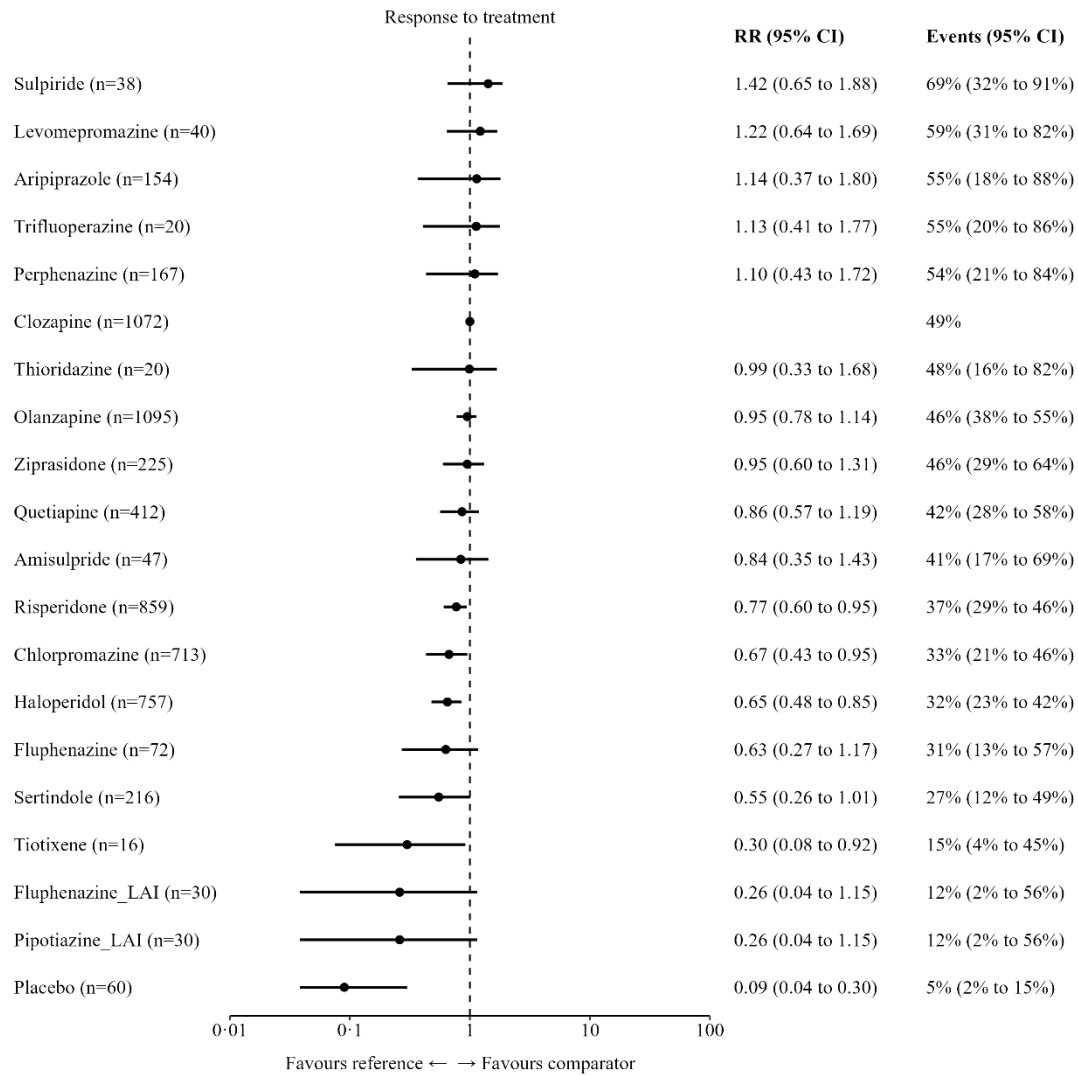

For this forest plot, we transformed the original OR to RR and exposure events rates (EER, called “events” in the forest plot) using the formula indicated above. Therefore, we used an average response rate with clozapine of 49% as the control event rate (CER).

Effect sizes are from the network meta-analysis. Order of treatments is according to the mean effect size. Reference is clozapine. The direction of the effect is indicated below the x-axis.

**League table for the outcome: Response to treatment (OR)**

|                        |                        |                        |                        |                        |                       |                       |                       |                       |                       |                       |                       |                       |                      |                      |                      |                      |                      |                      |                      |                        |
|------------------------|------------------------|------------------------|------------------------|------------------------|-----------------------|-----------------------|-----------------------|-----------------------|-----------------------|-----------------------|-----------------------|-----------------------|----------------------|----------------------|----------------------|----------------------|----------------------|----------------------|----------------------|------------------------|
| Sulpiride              | NA                     | NA                     | NA                     | NA                     | NA                    | NA                    | NA                    | NA                    | NA                    | NA                    | NA                    | NA                    | 4.60 (1.09 to 19.47) | NA                   | NA                   | NA                   | NA                   | NA                   | NA                   | NA                     |
| 1.52 (0.24 to 9.46)    | Levomepromazine        | NA                     | NA                     | 1.28 (0.27 to 6.13)    | NA                    | NA                    | NA                    | NA                    | NA                    | NA                    | NA                    | NA                    | 2.98 (0.65 to 13.64) | 3.20 (0.68 to 15.12) | NA                   | NA                   | NA                   | NA                   | NA                   | NA                     |
| 1.79 (0.19 to 17.31)   | 1.18 (0.21 to 6.59)    | Aripiprazole           | NA                     | 1.07 (0.43 to 2.65)    | NA                    | NA                    | NA                    | NA                    | NA                    | NA                    | NA                    | NA                    | NA                   | NA                   | NA                   | NA                   | NA                   | NA                   | NA                   | NA                     |
| 1.80 (0.22 to 14.90)   | 1.19 (0.18 to 7.92)    | 1.01 (0.10 to 10.19)   | Trifluoperazine        | NA                     | NA                    | 1.33 (0.25 to 7.05)   | NA                    | NA                    | NA                    | NA                    | NA                    | NA                    | 2.15 (0.43 to 10.78) | NA                   | NA                   | NA                   | NA                   | NA                   | NA                   | 36.00 (5.02 to 258.37) |
| 1.92 (0.24 to 15.37)   | 1.27 (0.29 to 5.46)    | 1.07 (0.43 to 2.65)    | 1.07 (0.13 to 8.99)    | Perphenazine           | NA                    | NA                    | NA                    | NA                    | NA                    | NA                    | NA                    | NA                    | NA                   | 2.50 (0.55 to 11.39) | NA                   | NA                   | NA                   | NA                   | NA                   | NA                     |
| 2.34 (0.49 to 11.11)   | 1.54 (0.48 to 4.94)    | 1.31 (0.23 to 7.39)    | 1.30 (0.26 to 6.62)    | 1.22 (0.28 to 5.34)    | Clozapine             | NA                    | 1.14 (0.72 to 1.80)   | 0.61 (0.23 to 1.66)   | NA                    | NA                    | 1.25 (0.79 to 1.99)   | 12.37 (3.98 to 38.43) | 1.88 (1.05 to 3.39)  | NA                   | NA                   | NA                   | NA                   | NA                   | NA                   | NA                     |
| 2.40 (0.30 to 19.04)   | 1.58 (0.25 to 10.08)   | 1.34 (0.14 to 13.08)   | 1.33 (0.25 to 7.05)    | 1.25 (0.15 to 10.11)   | 1.03 (0.21 to 4.94)   | Thioridazine          | NA                    | NA                    | NA                    | NA                    | NA                    | 1.62 (0.34 to 7.65)   | NA                   | NA                   | NA                   | NA                   | NA                   | NA                   | NA                   | 27.00 (3.94 to 185.22) |
| 2.57 (0.53 to 12.40)   | 1.69 (0.52 to 5.51)    | 1.43 (0.28 to 8.18)    | 1.42 (0.28 to 7.37)    | 1.34 (0.30 to 5.92)    | 1.10 (0.76 to 1.57)   | 1.07 (0.22 to 5.24)   | Olanzapine            | NA                    | 0.67 (0.11 to 3.94)   | 1.25 (0.40 to 3.88)   | 1.68 (1.02 to 2.78)   | 7.53 (0.34 to 164.72) | 2.04 (1.02 to 4.06)  | NA                   | NA                   | NA                   | NA                   | NA                   | NA                   | NA                     |
| 2.62 (0.53 to 13.00)   | 1.72 (0.48 to 6.22)    | 1.46 (0.23 to 9.17)    | 1.45 (0.27 to 7.83)    | 1.36 (0.27 to 6.74)    | 1.12 (0.54 to 2.33)   | 1.09 (0.21 to 5.57)   | 1.02 (0.46 to 2.25)   | Ziprasidone           | NA                    | NA                    | NA                    | 1.12 (0.47 to 2.66)   | NA                   | NA                   | NA                   | NA                   | NA                   | NA                   | NA                   | NA                     |
| 3.07 (0.64 to 14.65)   | 2.03 (0.61 to 6.76)    | 1.71 (0.29 to 10.11)   | 1.70 (0.28 to 8.79)    | 1.60 (0.35 to 7.35)    | 1.31 (0.69 to 2.49)   | 1.28 (0.26 to 6.24)   | 1.20 (0.62 to 2.32)   | 1.18 (0.50 to 2.76)   | Quetiapine            | NA                    | 1.84 (0.46 to 7.38)   | 1.17 (0.55 to 2.49)   | 1.76 (0.73 to 4.23)  | 1.83 (0.22 to 15.39) | NA                   | NA                   | NA                   | NA                   | NA                   | NA                     |
| 3.21 (0.46 to 22.35)   | 2.12 (0.41 to 10.87)   | 1.79 (0.22 to 14.31)   | 1.78 (0.24 to 13.12)   | 1.67 (0.26 to 10.84)   | 1.37 (0.42 to 4.50)   | 1.34 (0.19 to 9.41)   | 1.25 (0.40 to 3.88)   | 1.23 (0.31 to 4.89)   | 1.05 (0.28 to 3.89)   | Amisulpride           | NA                    | NA                    | NA                   | NA                   | NA                   | NA                   | NA                   | NA                   | NA                   | NA                     |
| 3.75 (0.78 to 18.04)   | 2.47 (0.76 to 8.04)    | 2.09 (0.37 to 11.94)   | 2.08 (0.40 to 10.73)   | 1.95 (0.44 to 8.64)    | 1.60 (1.11 to 2.30)   | 1.56 (0.32 to 7.62)   | 1.46 (0.99 to 2.14)   | 1.43 (0.65 to 3.16)   | 1.22 (0.63 to 2.35)   | 1.17 (0.35 to 3.86)   | Risperidone           | 0.18 (0.03 to 1.15)   | 1.30 (0.59 to 2.87)  | 1.65 (0.20 to 13.71) | 1.60 (0.67 to 3.86)  | NA                   | NA                   | NA                   | NA                   | NA                     |
| 4.60 (1.09 to 19.47)   | 3.03 (0.98 to 9.35)    | 2.57 (0.45 to 14.77)   | 2.55 (0.55 to 11.95)   | 2.39 (0.54 to 10.69)   | 1.96 (1.09 to 3.53)   | 1.92 (0.43 to 8.45)   | 1.79 (0.95 to 3.37)   | 1.76 (0.87 to 3.55)   | 1.50 (0.82 to 2.73)   | 1.43 (0.39 to 5.25)   | 1.23 (0.66 to 2.30)   | Chlorpromazine        | 0.25 (0.03 to 2.08)  | NA                   | NA                   | NA                   | NA                   | NA                   | NA                   | 19.76 (4.22 to 92.52)  |
| 4.77 (1.00 to 22.73)   | 3.14 (1.01 to 9.71)    | 2.66 (0.49 to 14.47)   | 2.64 (0.52 to 13.43)   | 2.48 (0.59 to 10.38)   | 2.03 (1.33 to 3.10)   | 1.98 (0.41 to 9.53)   | 1.86 (1.18 to 2.91)   | 1.82 (0.83 to 4.02)   | 1.55 (0.85 to 2.84)   | 1.48 (0.44 to 5.02)   | 1.27 (0.80 to 2.01)   | 1.03 (0.57 to 1.89)   | Haloperidol          | 0.96 (0.29 to 3.26)  | NA                   | 1.96 (0.39 to 9.73)  | NA                   | NA                   | NA                   | 3.85 (0.68 to 21.98)   |
| 4.95 (0.78 to 31.46)   | 3.26 (0.72 to 14.84)   | 2.76 (0.38 to 19.95)   | 2.75 (0.41 to 18.47)   | 2.57 (0.44 to 14.94)   | 2.11 (0.71 to 6.26)   | 2.06 (0.32 to 13.22)  | 1.93 (0.64 to 5.78)   | 1.89 (0.53 to 6.75)   | 1.61 (0.52 to 5.03)   | 1.54 (0.32 to 7.47)   | 1.32 (0.44 to 3.93)   | 1.08 (0.34 to 3.42)   | 1.04 (0.37 to 2.91)  | Fluphenazine         | NA                   | NA                   | NA                   | NA                   | NA                   | NA                     |
| 6.00 (0.99 to 36.34)   | 3.96 (0.91 to 17.23)   | 3.35 (0.48 to 23.57)   | 3.33 (0.52 to 21.44)   | 3.12 (0.55 to 17.59)   | 2.56 (0.99 to 6.62)   | 2.50 (0.41 to 15.33)  | 2.34 (0.90 to 6.10)   | 2.30 (0.70 to 7.48)   | 1.95 (0.65 to 5.85)   | 1.87 (0.42 to 8.25)   | 1.60 (0.67 to 3.86)   | 1.30 (0.44 to 3.83)   | 1.26 (0.47 to 3.39)  | 1.21 (0.30 to 4.92)  | Serindole            | NA                   | NA                   | NA                   | NA                   | NA                     |
| 13.22 (1.54 to 113.29) | 8.71 (1.33 to 56.98)   | 7.37 (0.76 to 71.55)   | 7.33 (0.88 to 61.29)   | 6.87 (0.85 to 55.28)   | 5.64 (1.17 to 27.13)  | 5.50 (0.69 to 44.08)  | 5.15 (1.06 to 25.01)  | 5.05 (0.93 to 27.35)  | 4.30 (0.85 to 21.69)  | 4.11 (0.59 to 28.79)  | 3.53 (0.72 to 17.18)  | 2.87 (0.58 to 14.12)  | 2.77 (0.60 to 12.78) | 2.67 (0.43 to 16.77) | 2.20 (0.36 to 13.45) | Tiotixene            | NA                   | NA                   | NA                   | 1.97 (0.33 to 11.93)   |
| 16.15 (1.18 to 221.59) | 10.64 (0.94 to 120.56) | 9.00 (0.57 to 141.77)  | 8.96 (0.73 to 109.56)  | 8.40 (0.62 to 113.45)  | 6.89 (0.75 to 62.90)  | 6.72 (0.57 to 79.31)  | 6.29 (0.68 to 57.96)  | 6.17 (0.64 to 60.02)  | 5.25 (0.56 to 48.97)  | 5.03 (0.42 to 60.86)  | 4.31 (0.47 to 39.74)  | 3.51 (0.39 to 31.23)  | 3.39 (0.38 to 30.47) | 3.26 (0.29 to 36.56) | 2.69 (0.25 to 29.30) | 1.22 (0.10 to 14.24) | Fluphenazine_LAI     | 1.00 (0.26 to 3.78)  | 2.79 (0.44 to 17.49) |                        |
| 16.15 (1.18 to 221.59) | 10.64 (0.94 to 120.56) | 9.00 (0.57 to 141.77)  | 8.96 (0.73 to 109.56)  | 8.40 (0.62 to 113.45)  | 6.89 (0.75 to 62.90)  | 6.72 (0.57 to 79.31)  | 6.29 (0.68 to 57.96)  | 6.17 (0.64 to 60.02)  | 5.25 (0.56 to 48.97)  | 5.03 (0.42 to 60.86)  | 4.31 (0.47 to 39.74)  | 3.51 (0.39 to 31.23)  | 3.39 (0.38 to 30.47) | 3.26 (0.29 to 36.56) | 2.69 (0.25 to 29.30) | 1.22 (0.10 to 14.24) | 1.00 (0.26 to 3.78)  | Pipotiazine_LAI      | 2.79 (0.44 to 17.49) |                        |
| 44.99 (6.96 to 290.82) | 29.64 (6.07 to 144.83) | 25.08 (3.21 to 195.81) | 24.95 (4.55 to 136.76) | 23.39 (3.70 to 147.96) | 19.19 (5.61 to 65.72) | 18.71 (3.60 to 97.32) | 17.51 (5.03 to 61.03) | 17.20 (4.50 to 65.72) | 14.64 (4.12 to 52.01) | 14.01 (2.59 to 75.60) | 12.01 (3.45 to 41.84) | 9.77 (2.99 to 31.96)  | 9.44 (2.83 to 31.45) | 9.09 (1.89 to 43.67) | 7.49 (1.63 to 34.45) | 3.40 (0.67 to 17.35) | 2.79 (0.44 to 17.49) | 2.79 (0.44 to 17.49) | Placebo              |                        |

Treatments are presented in order of efficacy ranking. Results of the network meta-analysis are reported in the left lower half and results of pairwise meta-analyses in the right upper half. Each cell provides the effect estimate and the corresponding 95% credible interval (95% CI) of a comparison (left lower half: treatment in column versus treatment in row; right upper half: treatment in row versus treatment in column). The type of effect size measure is odd ratio (OR). Bold results indicate 95% CI excluding no effect. NA=not available.

**League table for the outcome: Response to treatment (RR)**

|                      |                     |                       |                       |                      |                       |                       |                       |                      |                      |                      |                     |                     |                      |                      |                     |                      |                      |                      |                      |                       |
|----------------------|---------------------|-----------------------|-----------------------|----------------------|-----------------------|-----------------------|-----------------------|----------------------|----------------------|----------------------|---------------------|---------------------|----------------------|----------------------|---------------------|----------------------|----------------------|----------------------|----------------------|-----------------------|
| Sulpiride            | NA                  | NA                    | NA                    | NA                   | NA                    | NA                    | NA                    | NA                   | NA                   | NA                   | NA                  | NA                  | 2.16 (1.06 to 2.87)  | NA                   | NA                  | NA                   | NA                   | NA                   | NA                   | NA                    |
| 1.17 (0.43 to 1.6)   | Levomepromazine     | NA                    | NA                    | 1.12 (0.44 to 1.66)  | NA                    | NA                    | NA                    | NA                   | NA                   | NA                   | NA                  | NA                  | 1.84 (0.73 to 2.75)  | 1.91 (0.75 to 2.84)  | NA                  | NA                   | NA                   | NA                   | NA                   | NA                    |
| 1.25 (0.34 to 1.76)  | 1.08 (0.37 to 1.64) | Aripiprazole          | NA                    | 1.03 (0.61 to 1.42)  | NA                    | NA                    | NA                    | NA                   | NA                   | NA                   | NA                  | NA                  | NA                   | NA                   | NA                  | NA                   | NA                   | NA                   | NA                   | NA                    |
| 1.26 (0.38 to 1.76)  | 1.08 (0.32 to 1.68) | 1 (0.19 to 1.71)      | Trifluoperazine       | NA                   | NA                    | 1.15 (0.38 to 1.84)   | NA                    | NA                   | NA                   | NA                   | NA                  | NA                  | 1.58 (0.52 to 2.66)  | NA                   | NA                  | NA                   | NA                   | NA                   | NA                   | 14.03 (4.26 to 20.65) |
| 1.3 (0.4 to 1.81)    | 1.11 (0.46 to 1.64) | 1.03 (0.61 to 1.42)   | 1.03 (0.24 to 1.74)   | Perphenazine         | NA                    | NA                    | NA                    | NA                   | NA                   | NA                   | NA                  | NA                  | NA                   | 1.71 (0.64 to 2.72)  | NA                  | NA                   | NA                   | NA                   | NA                   | NA                    |
| 1.43 (0.65 to 1.92)  | 1.23 (0.64 to 1.73) | 1.14 (0.36 to 1.84)   | 1.14 (0.4 to 1.81)    | 1.11 (0.42 to 1.75)  | Clozapine             | NA                    | 1.07 (0.82 to 1.32)   | 0.74 (0.35 to 1.28)  | NA                   | NA                   | 1.15 (0.85 to 1.47) | 2.71 (2.06 to 3.02) | 1.48 (1.03 to 1.96)  | NA                   | NA                  | NA                   | NA                   | NA                   | NA                   | NA                    |
| 1.45 (0.45 to 2.02)  | 1.24 (0.38 to 1.92) | 1.16 (0.23 to 1.97)   | 1.15 (0.38 to 1.84)   | 1.12 (0.25 to 1.93)  | 1.02 (0.33 to 1.74)   | Thioridazine          | NA                    | NA                   | NA                   | NA                   | NA                  | 1.36 (0.43 to 2.48) | NA                   | NA                   | NA                  | NA                   | NA                   | NA                   | NA                   | 12.48 (3.48 to 20.05) |
| 1.5 (0.67 to 2.02)   | 1.29 (0.66 to 1.82) | 1.2 (0.38 to 1.93)    | 1.19 (0.41 to 1.9)    | 1.16 (0.44 to 1.84)  | 1.05 (0.85 to 1.25)   | 1.04 (0.34 to 1.8)    | Olanzapine            | NA                   | 0.77 (0.17 to 1.79)  | 1.14 (0.52 to 1.81)  | 1.35 (1.01 to 1.7)  | 2.47 (0.43 to 3.15) | 1.55 (1.01 to 2.1)   | NA                   | NA                  | NA                   | NA                   | NA                   | NA                   | NA                    |
| 1.52 (0.67 to 2.05)  | 1.3 (0.62 to 1.87)  | 1.21 (0.35 to 1.98)   | 1.21 (0.4 to 1.94)    | 1.17 (0.4 to 1.89)   | 1.06 (0.68 to 1.46)   | 1.05 (0.32 to 1.83)   | 1.01 (0.61 to 1.44)   | Ziprasidone          | NA                   | NA                   | NA                  | 1.08 (0.56 to 1.75) | NA                   | NA                   | NA                  | NA                   | NA                   | NA                   | NA                   | NA                    |
| 1.67 (0.75 to 2.24)  | 1.43 (0.72 to 2.02) | 1.33 (0.41 to 2.15)   | 1.32 (0.45 to 2.11)   | 1.29 (0.48 to 2.05)  | 1.16 (0.79 to 1.55)   | 1.15 (0.37 to 1.99)   | 1.11 (0.73 to 1.51)   | 1.1 (0.63 to 1.61)   | Quetiapine           | NA                   | 1.41 (0.57 to 2.24) | 1.11 (0.64 to 1.7)  | 1.43 (0.8 to 2.13)   | 1.47 (0.29 to 2.91)  | NA                  | NA                   | NA                   | NA                   | NA                   | NA                    |
| 1.71 (0.58 to 2.37)  | 1.47 (0.53 to 2.22) | 1.36 (0.32 to 2.28)   | 1.36 (0.34 to 2.27)   | 1.32 (0.37 to 2.22)  | 1.2 (0.54 to 1.89)    | 1.18 (0.28 to 1.93)   | 1.14 (0.52 to 1.81)   | 1.13 (0.43 to 1.93)  | 1.03 (0.39 to 1.82)  | Amisulpride          | NA                  | NA                  | NA                   | NA                   | NA                  | NA                   | NA                   | NA                   | NA                   | NA                    |
| 1.89 (0.85 to 2.53)  | 1.62 (0.83 to 2.28) | 1.5 (0.48 to 2.42)    | 1.5 (0.51 to 2.39)    | 1.45 (0.55 to 2.31)  | 1.32 (1.07 to 1.57)   | 1.3 (0.42 to 2.25)    | 1.25 (0.99 to 1.52)   | 1.24 (0.74 to 1.78)  | 1.13 (0.73 to 1.58)  | 1.1 (0.46 to 1.9)    | Risperidone         | 0.24 (0.04 to 1.1)  | 1.19 (0.67 to 1.82)  | 1.38 (0.26 to 2.86)  | 1.38 (0.73 to 2.22) | NA                   | NA                   | NA                   | NA                   | NA                    |
| 2.16 (1.06 to 2.87)  | 1.85 (0.99 to 2.59) | 1.72 (0.54 to 2.78)   | 1.72 (0.64 to 2.7)    | 1.67 (0.63 to 2.65)  | 1.51 (1.06 to 1.97)   | 1.49 (0.52 to 2.54)   | 1.44 (0.97 to 1.94)   | 1.42 (0.91 to 1.97)  | 1.3 (0.87 to 1.77)   | 1.26 (0.48 to 2.25)  | 1.15 (0.74 to 1.64) | Chlorpromazine      | 0.32 (0.04 to 1.56)  | NA                   | NA                  | NA                   | NA                   | NA                   | NA                   | 10.75 (3.69 to 18.17) |
| 2.21 (1 to 2.97)     | 1.9 (1.01 to 2.65)  | 1.76 (0.58 to 2.82)   | 1.76 (0.61 to 2.79)   | 1.71 (0.67 to 2.68)  | 1.54 (1.21 to 1.89)   | 1.52 (0.5 to 2.64)    | 1.47 (1.12 to 1.84)   | 1.45 (0.88 to 2.09)  | 1.33 (0.89 to 1.82)  | 1.29 (0.53 to 2.25)  | 1.17 (0.85 to 1.53) | 1.02 (0.66 to 1.48) | Haloperidol          | 0.97 (0.37 to 1.95)  | NA                  | 1.73 (0.43 to 4.42)  | NA                   | NA                   | NA                   | 3.41 (0.69 to 11.34)  |
| 2.27 (0.83 to 3.12)  | 1.95 (0.79 to 2.89) | 1.81 (0.47 to 3)      | 1.81 (0.5 to 2.97)    | 1.75 (0.53 to 2.9)   | 1.59 (0.78 to 2.44)   | 1.57 (0.4 to 2.85)    | 1.51 (0.72 to 2.38)   | 1.49 (0.62 to 2.49)  | 1.36 (0.61 to 2.28)  | 1.33 (0.4 to 2.55)   | 1.21 (0.53 to 2.1)  | 1.05 (0.42 to 1.99) | 1.03 (0.46 to 1.85)  | Fluphenazine         | NA                  | NA                   | NA                   | NA                   | NA                   | NA                    |
| 2.61 (0.99 to 3.57)  | 2.24 (0.93 to 3.3)  | 2.08 (0.55 to 3.44)   | 2.07 (0.59 to 3.4)    | 2.01 (0.62 to 3.31)  | 1.82 (0.99 to 2.69)   | 1.8 (0.48 to 3.25)    | 1.74 (0.92 to 2.62)   | 1.72 (0.76 to 2.79)  | 1.56 (0.71 to 2.59)  | 1.53 (0.49 to 2.86)  | 1.38 (0.73 to 2.22) | 1.21 (0.51 to 2.21) | 1.18 (0.55 to 2.09)  | 1.15 (0.37 to 2.44)  | Sertindole          | NA                   | NA                   | NA                   | NA                   | NA                    |
| 4.93 (1.43 to 6.89)  | 4.23 (1.27 to 6.55) | 3.93 (0.79 to 6.68)   | 3.92 (0.89 to 6.59)   | 3.8 (0.87 to 6.53)   | 3.44 (1.14 to 5.9)    | 3.4 (0.72 to 6.36)    | 3.28 (1.05 to 5.81)   | 3.24 (0.94 to 5.91)  | 2.96 (0.87 to 5.64)  | 2.88 (0.63 to 5.97)  | 2.62 (0.75 to 5.33) | 2.28 (0.62 to 5.03) | 2.23 (0.63 to 4.88)  | 2.17 (0.47 to 5.29)  | 1.89 (0.39 to 4.96) | Tiotixene            | NA                   | NA                   | NA                   | 1.89 (0.34 to 8.01)   |
| 5.88 (1.16 to 8.38)  | 5.04 (0.95 to 8.15) | 4.68 (0.6 to 8.23)    | 4.67 (0.75 to 8.1)    | 4.53 (0.65 to 8.12)  | 4.1 (0.77 to 7.73)    | 4.05 (0.6 to 7.91)    | 3.91 (0.71 to 7.66)   | 3.87 (0.67 to 7.69)  | 3.52 (0.59 to 7.5)   | 3.43 (0.45 to 7.7)   | 3.12 (0.5 to 7.27)  | 2.72 (0.42 to 6.96) | 2.66 (0.41 to 6.93)  | 2.59 (0.32 to 7.17)  | 2.25 (0.27 to 6.87) | 1.19 (0.11 to 5.64)  | Fluphenazine_LAI     | 1 (0.28 to 2.86)     | 2.58 (0.45 to 10.07) |                       |
| 5.88 (1.16 to 8.38)  | 5.04 (0.95 to 8.15) | 4.68 (0.6 to 8.23)    | 4.67 (0.75 to 8.1)    | 4.53 (0.65 to 8.12)  | 4.1 (0.77 to 7.73)    | 4.05 (0.6 to 7.91)    | 3.91 (0.71 to 7.66)   | 3.87 (0.67 to 7.69)  | 3.52 (0.59 to 7.5)   | 3.43 (0.45 to 7.7)   | 3.12 (0.5 to 7.27)  | 2.72 (0.42 to 6.96) | 2.66 (0.41 to 6.93)  | 2.59 (0.32 to 7.17)  | 2.25 (0.27 to 6.87) | 1.19 (0.11 to 5.64)  | 1 (0.28 to 2.86)     | Pipotiazine_LAI      | 2.58 (0.45 to 10.07) |                       |
| 15.16 (5.5 to 20.83) | 13 (4.95 to 19.49)  | 12.08 (2.92 to 20.16) | 12.05 (3.93 to 19.34) | 11.69 (3.3 to 19.54) | 10.58 (4.65 to 16.88) | 10.44 (3.23 to 18.34) | 10.07 (4.26 to 16.56) | 9.97 (3.89 to 16.88) | 9.09 (3.62 to 15.85) | 8.86 (2.42 to 17.44) | 8.05 (3.11 to 14.8) | 7.02 (2.75 to 13.4) | 6.85 (2.62 to 13.32) | 6.68 (1.82 to 15.02) | 5.81 (1.59 to 13.8) | 3.07 (0.68 to 10.02) | 2.58 (0.45 to 10.07) | 2.58 (0.45 to 10.07) | Placebo              |                       |

The original results given in OR (and their 95% CI) are transformed to RR (left lower half: treatment in column versus treatment in row; right upper half: treatment in row versus treatment in column) using the formula described above. For this transformation, we assumed a response rate with clozapine of 49% as the control event rate (CER) for all comparisons of active antipsychotic versus clozapine.

Treatments are presented in order of efficacy ranking. Results of the network meta-analysis are reported in the left lower half and results of pairwise meta-analyses in the right upper half. Bold results indicate 95% CI excluding no effect. NA=not available.

## Forest plot of results of pairwise meta-analyses

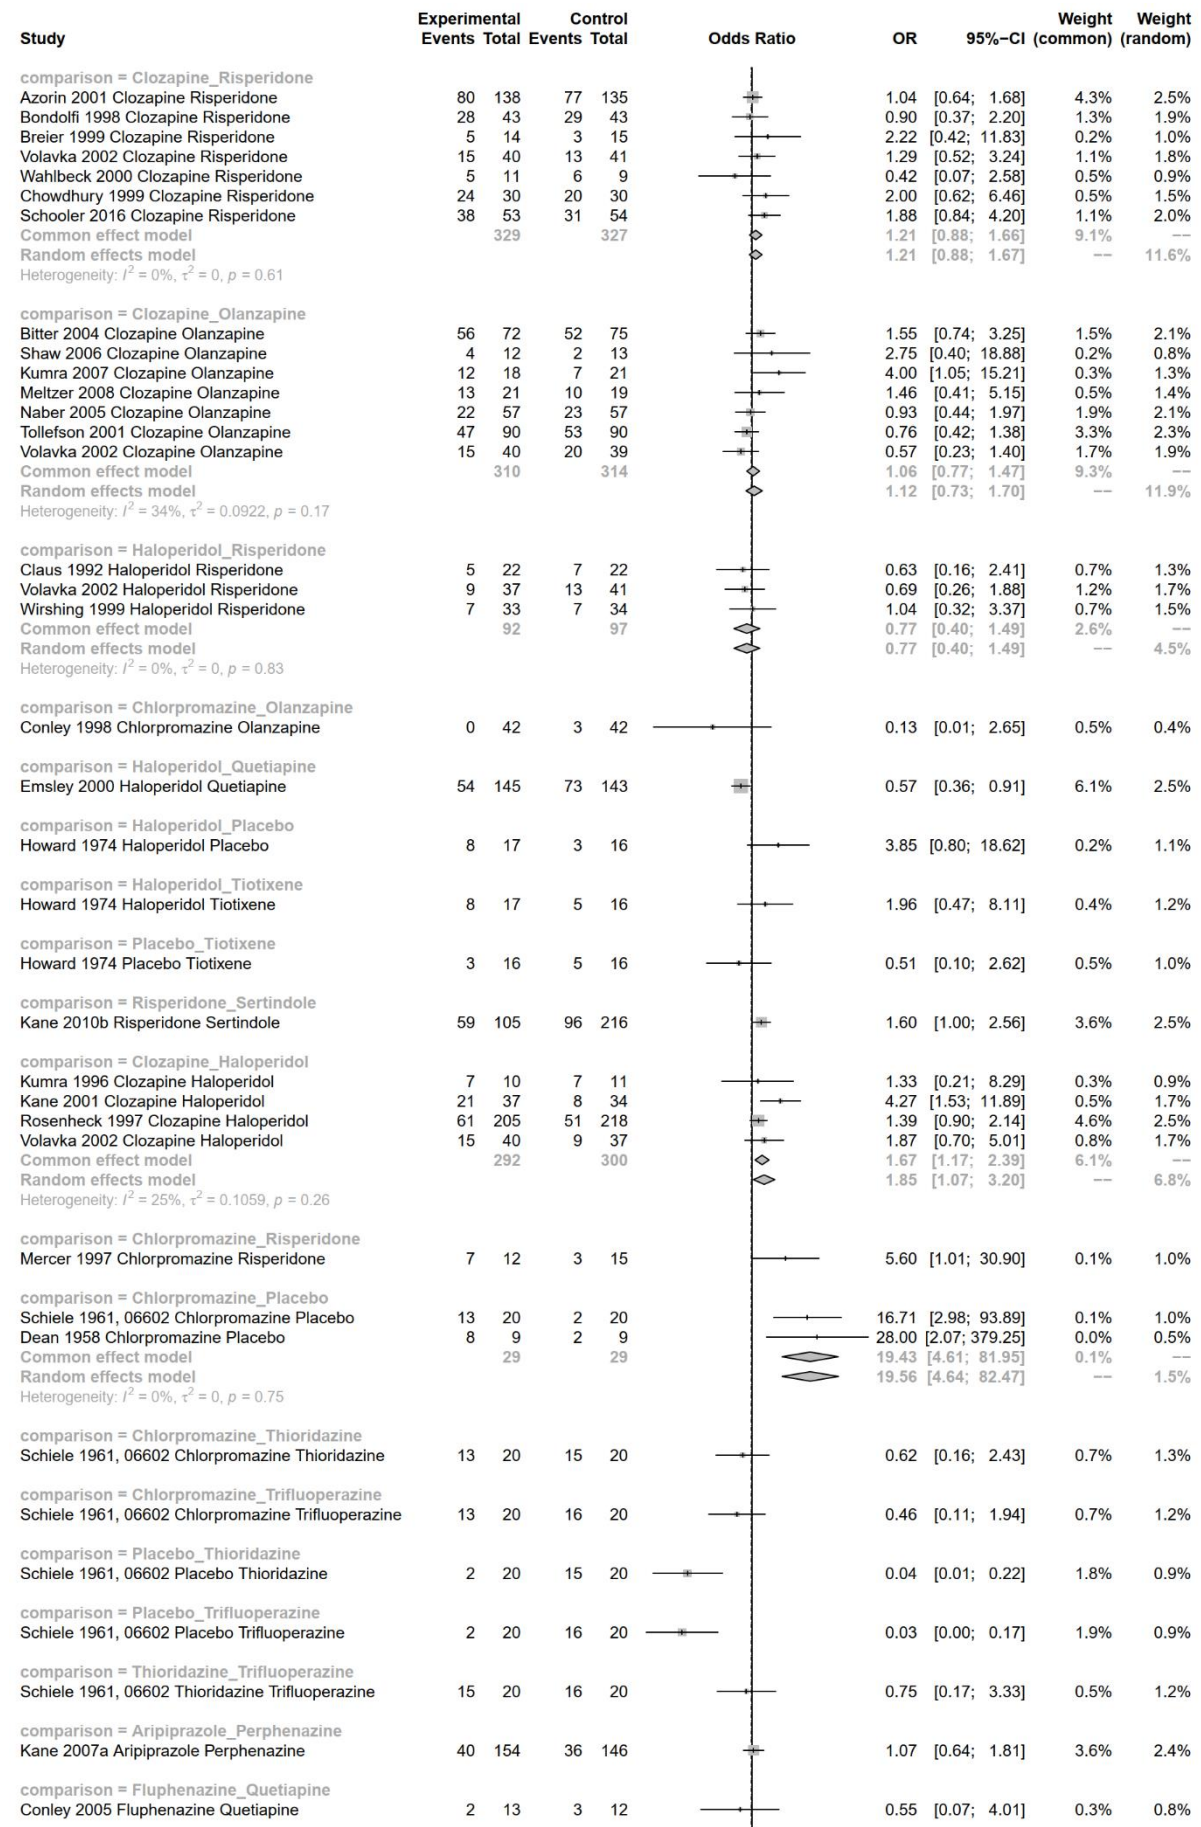

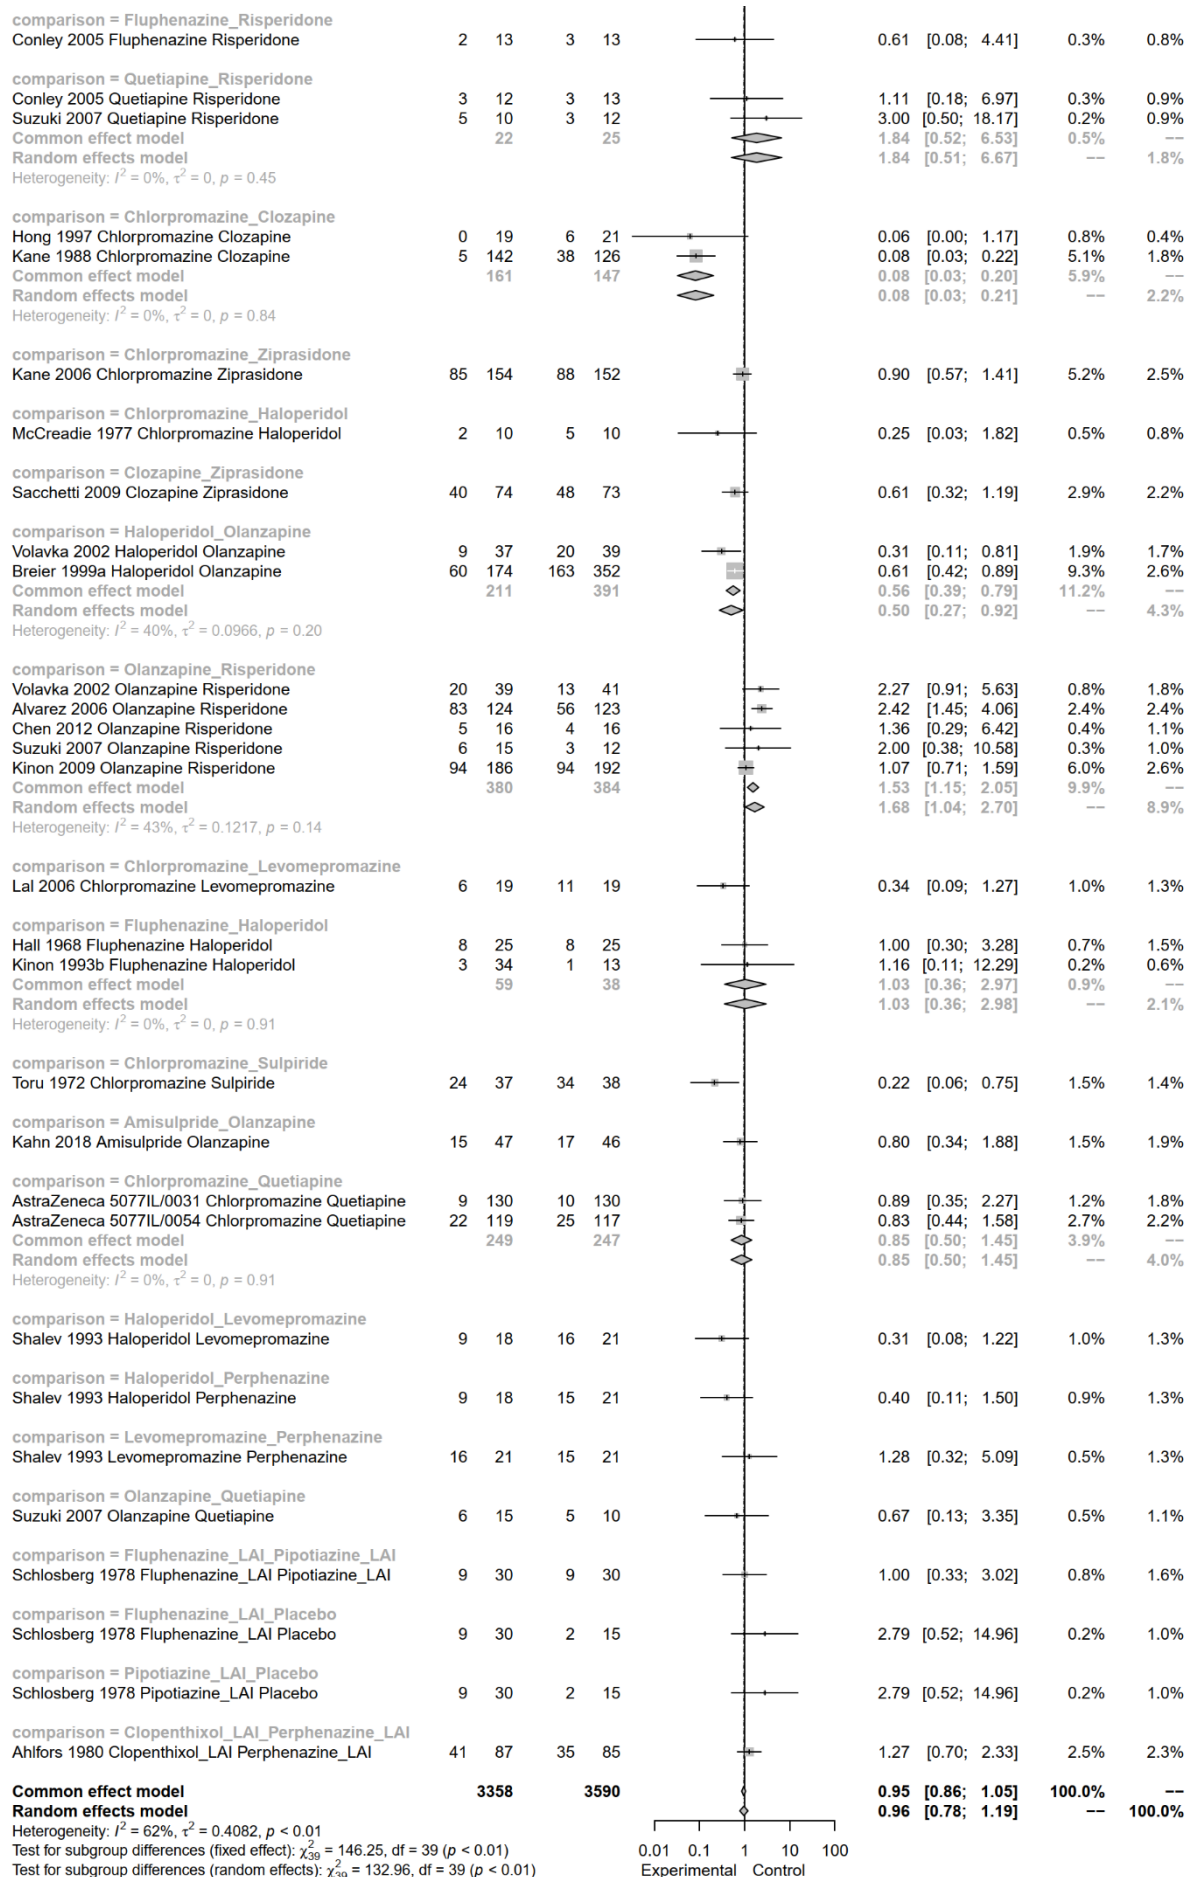

*A summary effect size is calculated by pairwise meta-analyses of all studies of a specific comparison. The type of effect size measure is OR.*

## 8.4 Discontinuation due to any reason

We transformed the original ORs to RRs and EERs vs. CER assuming the baseline discontinuation rate due to any reason with clozapine of 35% (namely CER). 35% was the average discontinuation rate due to any reason with clozapine across all clozapine-arms in the network meta-analysis, as estimated by a single-arm meta-analysis of proportions.

### Network plot

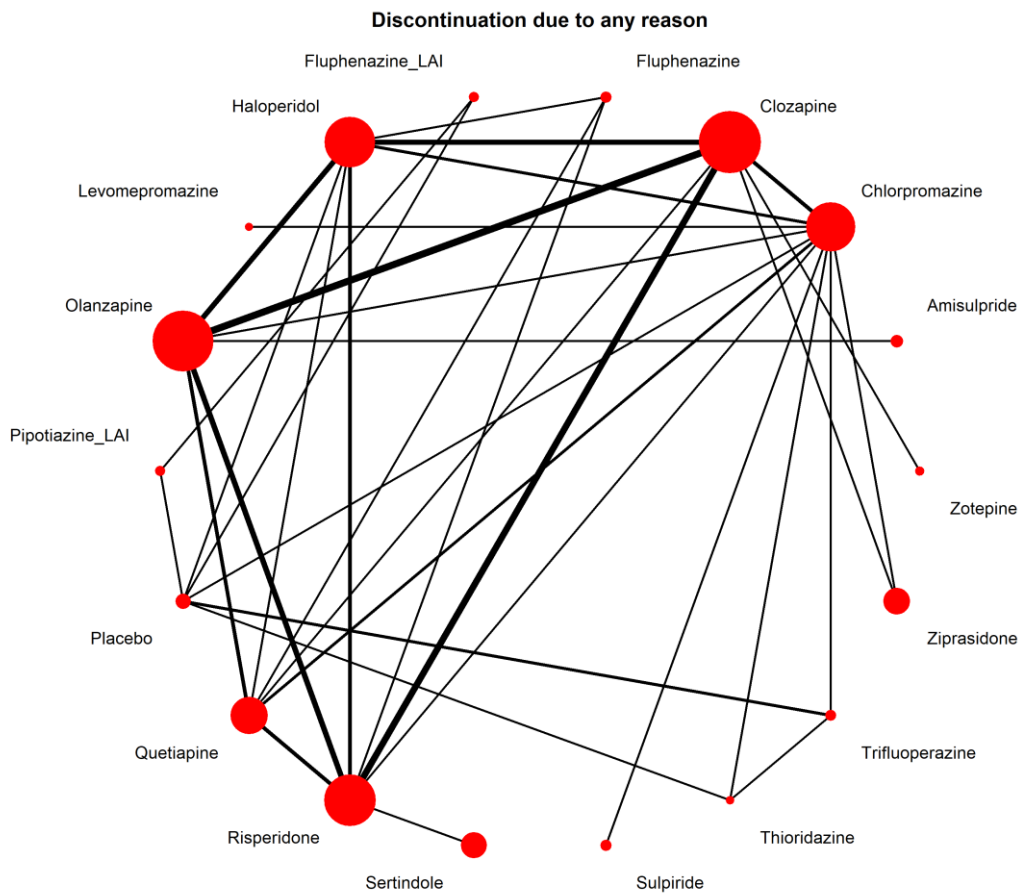

*Lines link treatments with direct comparisons in trials; thickness of lines corresponds to the number of trials evaluating the comparison; size of the nodes corresponds to the number of participants assigned to the treatment.*



### Forest-plot of results of network meta-analysis for antipsychotic drugs versus clozapine

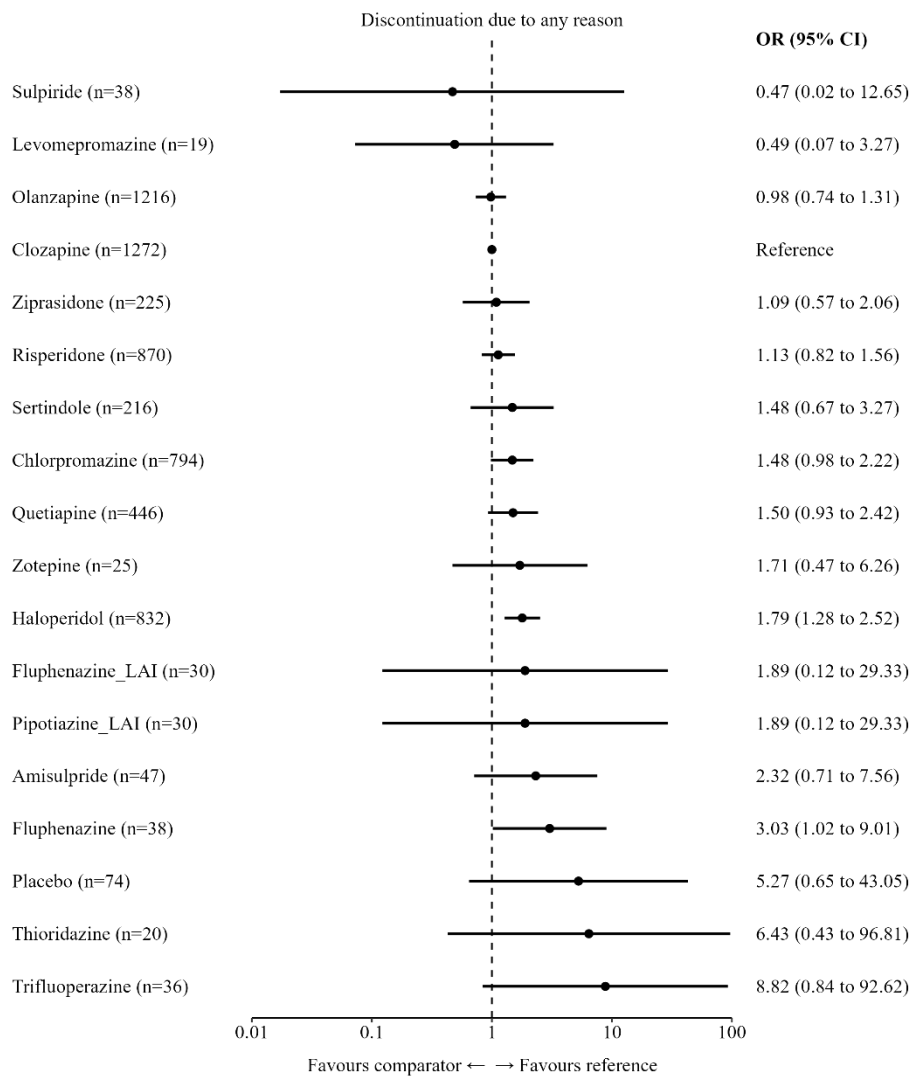

Effect sizes, measured as odds ratio (OR), are from the network meta-analysis. Order of treatments is according to the mean effect size. Reference is clozapine. The direction of the effect is indicated below the x-axis.

### Forest plot with RR and EER versus CER

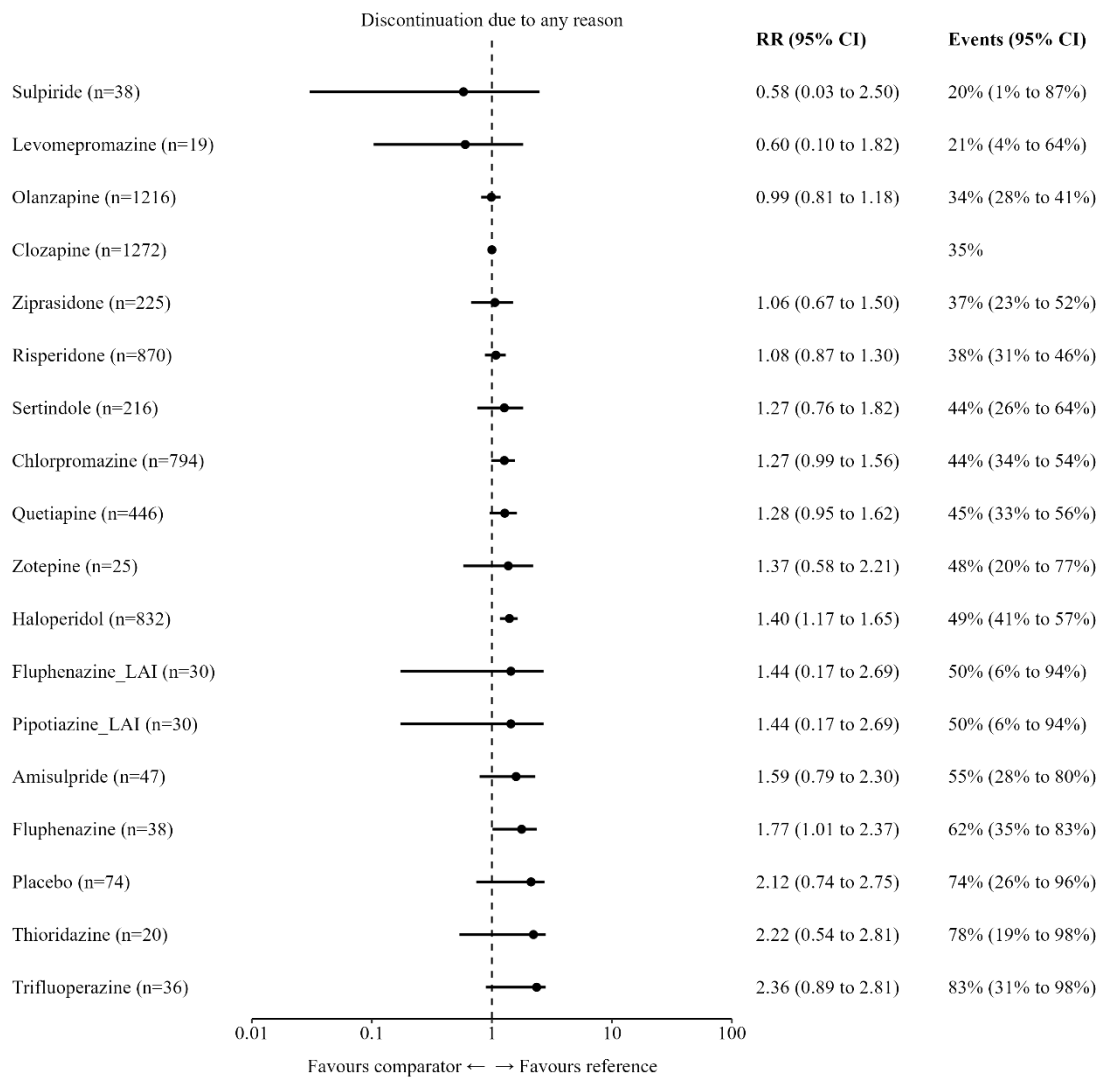

For this forest plot, we transformed the original OR to RR and exposure events rates (EER, called “events” in the forest plot) using the formula indicated above. Therefore, we used an average discontinuation rate (due to any reason) with clozapine of 35% as the control event rate (CER).

Effect sizes are from the network meta-analysis. Order of treatments is according to the mean effect size. Reference is clozapine. The direction of the effect is indicated below the x-axis.

**League table for the outcome: Discontinuation due to any reason (OR)**

|                      |                     |                            |                            |                     |                            |                      |                      |                      |                            |                      |                            |                      |                     |                     |                     |                      |                     |                      |
|----------------------|---------------------|----------------------------|----------------------------|---------------------|----------------------------|----------------------|----------------------|----------------------|----------------------------|----------------------|----------------------------|----------------------|---------------------|---------------------|---------------------|----------------------|---------------------|----------------------|
| Sulpiride            | NA                  | NA                         | NA                         | NA                  | NA                         | NA                   | NA                   | 0.32 (0.01 to 8.35)  | NA                         | NA                   | NA                         | NA                   | NA                  | NA                  | NA                  | NA                   | NA                  | NA                   |
| 0.96 (0.02 to 41.48) | Levomepromazine     | NA                         | NA                         | NA                  | NA                         | NA                   | NA                   | 0.33 (0.05 to 2.12)  | NA                         | NA                   | NA                         | NA                   | NA                  | NA                  | NA                  | NA                   | NA                  | NA                   |
| 0.48 (0.02 to 12.96) | 0.50 (0.07 to 3.36) | Olanzapine                 | 0.90 (0.62 to 1.31)        | NA                  | 0.87 (0.57 to 1.33)        | NA                   | NA                   | 0.89 (0.31 to 2.61)  | 0.79 (0.25 to 2.46)        | NA                   | <b>0.51 (0.31 to 0.85)</b> | NA                   | NA                  | 0.42 (0.13 to 1.33) | NA                  | NA                   | NA                  | NA                   |
| 0.47 (0.02 to 12.65) | 0.49 (0.07 to 3.27) | 0.98 (0.74 to 1.31)        | Clozapine                  | 1.04 (0.44 to 2.41) | 0.85 (0.57 to 1.28)        | NA                   | NA                   | 0.76 (0.42 to 1.37)  | <b>0.16 (0.03 to 0.86)</b> | 0.58 (0.16 to 2.13)  | <b>0.52 (0.33 to 0.83)</b> | NA                   | NA                  | NA                  | NA                  | NA                   | NA                  | NA                   |
| 0.43 (0.02 to 12.09) | 0.45 (0.06 to 3.21) | 0.90 (0.46 to 1.79)        | 0.92 (0.49 to 1.75)        | Ziprasidone         | NA                         | NA                   | NA                   | 0.84 (0.35 to 2.01)  | NA                         | NA                   | NA                         | NA                   | NA                  | NA                  | NA                  | NA                   | NA                  | NA                   |
| 0.41 (0.02 to 11.28) | 0.43 (0.06 to 2.94) | 0.87 (0.62 to 1.20)        | 0.88 (0.64 to 1.22)        | 0.96 (0.47 to 1.94) | Risperidone                | 0.77 (0.37 to 1.59)  | 0.77 (0.37 to 1.59)  | 1.69 (0.13 to 22.44) | 0.49 (0.15 to 1.65)        | NA                   | 0.89 (0.42 to 1.91)        | NA                   | NA                  | NA                  | 0.20 (0.03 to 1.13) | NA                   | NA                  | NA                   |
| 0.32 (0.01 to 9.38)  | 0.33 (0.04 to 2.58) | 0.67 (0.30 to 1.48)        | 0.68 (0.31 to 1.50)        | 0.74 (0.27 to 2.03) | 0.77 (0.37 to 1.59)        | Sertindole           | NA                   | NA                   | NA                         | NA                   | NA                         | NA                   | NA                  | NA                  | NA                  | NA                   | NA                  | NA                   |
| 0.32 (0.01 to 8.35)  | 0.33 (0.05 to 2.12) | 0.66 (0.42 to 1.04)        | 0.68 (0.45 to 1.02)        | 0.74 (0.39 to 1.40) | 0.77 (0.47 to 1.24)        | 1.00 (0.42 to 2.40)  | Chlorpromazine       | 1.18 (0.69 to 2.01)  | NA                         | 2.96 (0.24 to 36.39) | NA                         | NA                   | NA                  | NA                  | 0.32 (0.01 to 8.61) | 0.32 (0.01 to 8.61)  | 0.32 (0.01 to 8.61) |                      |
| 0.31 (0.01 to 8.46)  | 0.32 (0.05 to 2.19) | 0.65 (0.40 to 1.08)        | 0.67 (0.41 to 1.08)        | 0.72 (0.35 to 1.51) | 0.75 (0.45 to 1.28)        | 0.98 (0.40 to 2.42)  | 0.98 (0.63 to 1.53)  | Quetiapine           | NA                         | 1.20 (0.56 to 2.61)  | NA                         | NA                   | NA                  | 0.32 (0.06 to 1.78) | NA                  | NA                   | NA                  |                      |
| 0.27 (0.01 to 9.43)  | 0.28 (0.03 to 2.84) | 0.57 (0.15 to 2.16)        | 0.58 (0.16 to 2.13)        | 0.63 (0.15 to 2.69) | 0.66 (0.17 to 2.51)        | 0.86 (0.19 to 3.94)  | 0.86 (0.22 to 3.35)  | 0.88 (0.22 to 3.48)  | Zotepine                   | NA                   | NA                         | NA                   | NA                  | NA                  | NA                  | NA                   | NA                  | NA                   |
| 0.26 (0.01 to 7.11)  | 0.27 (0.04 to 1.85) | <b>0.55 (0.38 to 0.78)</b> | <b>0.56 (0.40 to 0.78)</b> | 0.61 (0.30 to 1.23) | <b>0.63 (0.42 to 0.94)</b> | 0.82 (0.36 to 1.89)  | 0.82 (0.51 to 1.32)  | 0.84 (0.51 to 1.36)  | 0.96 (0.25 to 3.65)        | Haloperidol          | NA                         | NA                   | NA                  | 1.00 (0.23 to 4.40) | 0.25 (0.02 to 3.96) | NA                   | NA                  |                      |
| 0.25 (0.00 to 17.61) | 0.26 (0.01 to 7.04) | 0.52 (0.03 to 8.07)        | 0.53 (0.03 to 8.18)        | 0.57 (0.03 to 9.43) | 0.60 (0.04 to 9.36)        | 0.78 (0.05 to 13.41) | 0.78 (0.05 to 12.06) | 0.79 (0.05 to 12.46) | 0.91 (0.04 to 18.76)       | 0.95 (0.06 to 14.57) | Fluphenazine LAI           | 1.00 (0.29 to 3.40)  | NA                  | NA                  | 0.36 (0.06 to 2.09) | NA                   | NA                  |                      |
| 0.25 (0.00 to 17.61) | 0.26 (0.01 to 7.04) | 0.52 (0.03 to 8.07)        | 0.53 (0.03 to 8.18)        | 0.57 (0.03 to 9.43) | 0.60 (0.04 to 9.36)        | 0.78 (0.05 to 13.41) | 0.78 (0.05 to 12.06) | 0.79 (0.05 to 12.46) | 0.91 (0.04 to 18.76)       | 0.95 (0.06 to 14.57) | 1.00 (0.29 to 3.40)        | Pipotiazine LAI      | NA                  | NA                  | 0.36 (0.06 to 2.09) | NA                   | NA                  |                      |
| 0.20 (0.01 to 6.65)  | 0.21 (0.02 to 1.95) | 0.42 (0.13 to 1.33)        | 0.43 (0.13 to 1.40)        | 0.47 (0.12 to 1.78) | 0.49 (0.15 to 1.61)        | 0.64 (0.16 to 2.57)  | 0.64 (0.19 to 2.18)  | 0.65 (0.19 to 2.26)  | 0.74 (0.13 to 4.26)        | 0.77 (0.23 to 2.56)  | 0.82 (0.04 to 15.96)       | 0.82 (0.04 to 15.96) | Amisulpride         | NA                  | NA                  | NA                   | NA                  |                      |
| 0.15 (0.00 to 4.92)  | 0.16 (0.02 to 1.41) | <b>0.32 (0.11 to 0.97)</b> | <b>0.33 (0.11 to 0.98)</b> | 0.36 (0.10 to 1.25) | 0.37 (0.13 to 1.12)        | 0.49 (0.13 to 1.82)  | 0.49 (0.16 to 1.50)  | 0.50 (0.16 to 1.51)  | 0.57 (0.10 to 3.08)        | 0.59 (0.20 to 1.73)  | 0.63 (0.03 to 11.69)       | 0.63 (0.03 to 11.69) | 0.77 (0.16 to 3.74) | Fluphenazine        | NA                  | NA                   | NA                  |                      |
| 0.09 (0.00 to 4.32)  | 0.09 (0.01 to 1.52) | 0.19 (0.02 to 1.53)        | 0.19 (0.02 to 1.55)        | 0.21 (0.02 to 1.81) | 0.21 (0.03 to 1.78)        | 0.28 (0.03 to 2.62)  | 0.28 (0.03 to 2.28)  | 0.28 (0.03 to 2.37)  | 0.33 (0.03 to 3.83)        | 0.34 (0.04 to 2.75)  | 0.36 (0.06 to 2.09)        | 0.36 (0.06 to 2.09)  | 0.44 (0.04 to 4.83) | 0.57 (0.06 to 5.95) | Placebo             | 1.00 (0.09 to 11.09) | 0.57 (0.14 to 2.43) |                      |
| 0.07 (0.00 to 5.07)  | 0.08 (0.00 to 2.01) | 0.15 (0.01 to 2.31)        | 0.16 (0.01 to 2.34)        | 0.17 (0.01 to 2.69) | 0.18 (0.01 to 2.68)        | 0.23 (0.01 to 3.84)  | 0.23 (0.02 to 3.43)  | 0.23 (0.02 to 3.56)  | 0.27 (0.01 to 5.38)        | 0.28 (0.02 to 4.18)  | 0.29 (0.02 to 4.76)        | 0.29 (0.02 to 4.76)  | 0.29 (0.02 to 4.76) | 0.36 (0.02 to 6.87) | 0.47 (0.03 to 8.56) | 0.82 (0.09 to 7.08)  | Thioridazine        | 1.00 (0.09 to 11.09) |
| 0.05 (0.00 to 2.97)  | 0.06 (0.00 to 1.10) | 0.11 (0.01 to 1.17)        | 0.11 (0.01 to 1.19)        | 0.12 (0.01 to 1.38) | 0.13 (0.01 to 1.36)        | 0.17 (0.01 to 1.98)  | 0.17 (0.02 to 1.75)  | 0.17 (0.02 to 1.82)  | 0.19 (0.01 to 2.85)        | 0.20 (0.02 to 2.12)  | 0.21 (0.02 to 2.06)        | 0.21 (0.02 to 2.06)  | 0.26 (0.02 to 3.61) | 0.34 (0.03 to 4.47) | 0.60 (0.14 to 2.48) | 0.73 (0.08 to 6.55)  | Trifluoperazine     |                      |

Treatments are presented in order of efficacy ranking. Results of the network meta-analysis are reported in the left lower half and results of pairwise meta-analyses in the right upper half. Each cell provides the effect estimate and the corresponding 95% credible interval (95% CI) of a comparison (left lower half: treatment in column versus treatment in row; right upper half: treatment in row versus treatment in column). The type of effect size measure is odd ratio (OR). Bold results indicate 95% CI excluding no effect. NA=not available.

**League table for the outcome: Discontinuation due to any reason (RR)**

|                     |                     |                            |                            |                     |                            |                     |                     |                     |                            |                     |                            |                     |                     |                     |                     |                     |                     |    |    |
|---------------------|---------------------|----------------------------|----------------------------|---------------------|----------------------------|---------------------|---------------------|---------------------|----------------------------|---------------------|----------------------------|---------------------|---------------------|---------------------|---------------------|---------------------|---------------------|----|----|
| Sulpiride           | NA                  | NA                         | NA                         | NA                  | NA                         | NA                  | NA                  | 0.43 (0.02 to 2.23) | NA                         | NA                  | NA                         | NA                  | NA                  | NA                  | NA                  | NA                  | NA                  | NA |    |
| 0.97 (0.02 to 5.43) | Levomepromazine     | NA                         | NA                         | NA                  | NA                         | NA                  | NA                  | 0.44 (0.08 to 1.5)  | NA                         | NA                  | NA                         | NA                  | NA                  | NA                  | NA                  | NA                  | NA                  | NA | NA |
| 0.56 (0.03 to 2.94) | 0.58 (0.1 to 2.01)  | Olanzapine                 | 0.93 (0.7 to 1.2)          | NA                  | 0.91 (0.66 to 1.21)        | NA                  | NA                  | 0.93 (0.42 to 1.63) | 0.86 (0.35 to 1.58)        | NA                  | <b>0.64 (0.44 to 0.91)</b> | NA                  | NA                  | 0.58 (0.23 to 1.15) | NA                  | NA                  | NA                  | NA | NA |
| 0.56 (0.03 to 2.9)  | 0.57 (0.1 to 1.97)  | 0.99 (0.8 to 1.2)          | Clozapine                  | 1.03 (0.53 to 1.68) | 0.89 (0.66 to 1.18)        | NA                  | NA                  | 0.83 (0.54 to 1.2)  | <b>0.23 (0.05 to 0.91)</b> | 0.7 (0.24 to 1.45)  | <b>0.65 (0.46 to 0.89)</b> | NA                  | NA                  | NA                  | NA                  | NA                  | NA                  | NA | NA |
| 0.52 (0.03 to 2.75) | 0.54 (0.08 to 1.91) | 0.93 (0.55 to 1.44)        | 0.94 (0.58 to 1.42)        | Ziprasidone         | NA                         | NA                  | NA                  | 0.89 (0.46 to 1.46) | NA                         | NA                  | NA                         | NA                  | NA                  | NA                  | NA                  | NA                  | NA                  | NA | NA |
| 0.5 (0.03 to 2.67)  | 0.52 (0.09 to 1.83) | 0.91 (0.7 to 1.13)         | 0.91 (0.72 to 1.14)        | 0.97 (0.56 to 1.5)  | Risperidone                | 0.84 (0.48 to 1.3)  | 1.34 (0.19 to 2.49) | 0.61 (0.22 to 1.32) | NA                         | 0.93 (0.56 to 1.38) | NA                         | NA                  | NA                  | 0.36 (0.06 to 1.05) | NA                  | NA                  | NA                  | NA | NA |
| 0.43 (0.02 to 2.27) | 0.44 (0.06 to 1.62) | 0.76 (0.41 to 1.26)        | 0.77 (0.42 to 1.26)        | 0.82 (0.37 to 1.47) | 0.84 (0.48 to 1.3)         | Sertindole          | NA                  | NA                  | NA                         | NA                  | NA                         | NA                  | NA                  | NA                  | NA                  | NA                  | NA                  | NA | NA |
| 0.43 (0.02 to 2.23) | 0.44 (0.08 to 1.5)  | 0.76 (0.54 to 1.02)        | 0.77 (0.57 to 1.01)        | 0.82 (0.5 to 1.22)  | 0.84 (0.59 to 1.14)        | 1 (0.54 to 1.58)    | Chlorpromazine      | 1.1 (0.78 to 1.45)  | NA                         | 1.62 (0.35 to 2.29) | NA                         | NA                  | NA                  | NA                  | 0.6 (0.03 to 1.39)  | 0.63 (0.04 to 1.33) | 0.69 (0.04 to 1.24) | NA | NA |
| 0.42 (0.02 to 2.21) | 0.43 (0.08 to 1.51) | 0.75 (0.52 to 1.05)        | 0.77 (0.53 to 1.05)        | 0.81 (0.46 to 1.27) | 0.83 (0.57 to 1.27)        | 0.99 (0.52 to 1.57) | 0.99 (0.73 to 1.27) | Quetiapine          | NA                         | 1.11 (0.69 to 1.56) | NA                         | NA                  | NA                  | 0.51 (0.12 to 1.24) | NA                  | NA                  | NA                  | NA | NA |
| 0.39 (0.02 to 2.11) | 0.4 (0.05 to 1.62)  | 0.69 (0.23 to 1.46)        | 0.7 (0.24 to 1.45)         | 0.74 (0.23 to 1.59) | 0.77 (0.26 to 1.55)        | 0.91 (0.28 to 1.78) | 0.91 (0.32 to 1.7)  | 0.93 (0.32 to 1.72) | Zotepine                   | NA                  | NA                         | NA                  | NA                  | NA                  | NA                  | NA                  | NA                  | NA | NA |
| 0.38 (0.02 to 1.99) | 0.39 (0.07 to 1.36) | <b>0.68 (0.51 to 0.86)</b> | <b>0.69 (0.54 to 0.86)</b> | 0.73 (0.43 to 1.12) | <b>0.75 (0.56 to 0.96)</b> | 0.89 (0.49 to 1.38) | 0.89 (0.64 to 1.16) | 0.9 (0.64 to 1.18)  | 0.98 (0.37 to 1.73)        | Haloperidol         | NA                         | NA                  | NA                  | 1 (0.4 to 1.53)     | 0.51 (0.06 to 1.31) | NA                  | NA                  | NA | NA |
| 0.37 (0 to 2.15)    | 0.38 (0.02 to 1.95) | 0.66 (0.05 to 1.99)        | 0.67 (0.05 to 1.99)        | 0.7 (0.05 to 2.03)  | 0.73 (0.07 to 2.03)        | 0.86 (0.08 to 2.1)  | 0.86 (0.08 to 2.08) | 0.87 (0.08 to 2.09) | 0.95 (0.07 to 2.16)        | 0.97 (0.1 to 2.12)  | Fluphenazine_LAI           | 1 (0.42 to 1.67)    | NA                  | NA                  | 0.64 (0.17 to 1.2)  | NA                  | NA                  | NA | NA |
| 0.37 (0 to 2.15)    | 0.38 (0.02 to 1.95) | 0.66 (0.05 to 1.99)        | 0.67 (0.05 to 1.99)        | 0.7 (0.05 to 2.03)  | 0.73 (0.07 to 2.03)        | 0.86 (0.08 to 2.1)  | 0.86 (0.08 to 2.08) | 0.87 (0.08 to 2.09) | 0.95 (0.07 to 2.16)        | 0.97 (0.1 to 2.12)  | 1 (0.42 to 1.67)           | Pipofiazine_LAI     | NA                  | NA                  | 0.64 (0.17 to 1.2)  | NA                  | NA                  | NA | NA |
| 0.33 (0.02 to 1.78) | 0.34 (0.04 to 1.33) | 0.58 (0.23 to 1.15)        | 0.59 (0.23 to 1.17)        | 0.63 (0.21 to 1.29) | 0.65 (0.26 to 1.24)        | 0.78 (0.27 to 1.46) | 0.78 (0.31 to 1.39) | 0.78 (0.31 to 1.4)  | 0.85 (0.23 to 1.65)        | 0.87 (0.37 to 1.46) | 0.9 (0.07 to 1.93)         | 0.9 (0.07 to 1.93)  | Amisulpride         | NA                  | NA                  | NA                  | NA                  | NA | NA |
| 0.28 (0 to 1.56)    | 0.3 (0.04 to 1.15)  | <b>0.51 (0.22 to 0.99)</b> | <b>0.52 (0.22 to 0.99)</b> | 0.56 (0.2 to 1.1)   | 0.57 (0.25 to 1.05)        | 0.68 (0.25 to 1.25) | 0.68 (0.3 to 1.18)  | 0.69 (0.3 to 1.18)  | 0.75 (0.2 to 1.43)         | 0.76 (0.36 to 1.23) | 0.79 (0.06 to 1.69)        | 0.79 (0.06 to 1.69) | 0.88 (0.3 to 1.49)  | Fluphenazine        | NA                  | NA                  | NA                  | NA | NA |
| 0.24 (0 to 1.32)    | 0.24 (0.03 to 1.12) | 0.42 (0.06 to 1.12)        | 0.42 (0.06 to 1.13)        | 0.45 (0.06 to 1.17) | 0.45 (0.09 to 1.16)        | 0.55 (0.09 to 1.25) | 0.55 (0.09 to 1.22) | 0.55 (0.09 to 1.23) | 0.61 (0.09 to 1.31)        | 0.62 (0.12 to 1.25) | 0.64 (0.17 to 1.2)         | 0.64 (0.17 to 1.2)  | 0.71 (0.12 to 1.34) | 0.81 (0.17 to 1.36) | Placebo             | 1 (0.26 to 1.34)    | 0.86 (0.43 to 1.15) | NA | NA |
| 0.21 (0 to 1.29)    | 0.24 (0 to 1.16)    | 0.39 (0.04 to 1.19)        | 0.41 (0.04 to 1.19)        | 0.42 (0.04 to 1.21) | 0.44 (0.04 to 1.21)        | 0.52 (0.04 to 1.26) | 0.52 (0.07 to 1.25) | 0.52 (0.07 to 1.25) | 0.57 (0.04 to 1.29)        | 0.58 (0.07 to 1.27) | 0.59 (0.07 to 1.28)        | 0.59 (0.07 to 1.28) | 0.67 (0.07 to 1.31) | 0.76 (0.1 to 1.33)  | 0.94 (0.26 to 1.31) | Thioridazine        | 1 (0.31 to 1.24)    | NA | NA |
| 0.2 (0 to 1.17)     | 0.23 (0 to 1.02)    | 0.36 (0.04 to 1.03)        | 0.36 (0.04 to 1.04)        | 0.39 (0.04 to 1.06) | 0.41 (0.04 to 1.06)        | 0.49 (0.04 to 1.12) | 0.49 (0.09 to 1.1)  | 0.49 (0.09 to 1.11) | 0.52 (0.04 to 1.16)        | 0.54 (0.09 to 1.13) | 0.55 (0.09 to 1.13)        | 0.55 (0.09 to 1.13) | 0.62 (0.09 to 1.19) | 0.7 (0.13 to 1.2)   | 0.87 (0.43 to 1.15) | 0.93 (0.29 to 1.22) | Trifluoperazine     | NA | NA |

The original results given in OR (and their 95% CI) are transformed to RR (left lower half: treatment in column versus treatment in row; right upper half: treatment in row versus treatment in column) using the formula described above. For this transformation, we assumed a discontinuation rate (due to any reason) with clozapine of 35% as the control event rate (CER) for all comparisons of active antipsychotic versus clozapine.

Treatments are presented in order of efficacy ranking. Results of the network meta-analysis are reported in the left lower half and results of pairwise meta-analyses in the right upper half. Bold results indicate 95% CI excluding no effect. NA=not available.

## Forest plot of results of pairwise meta-analyses

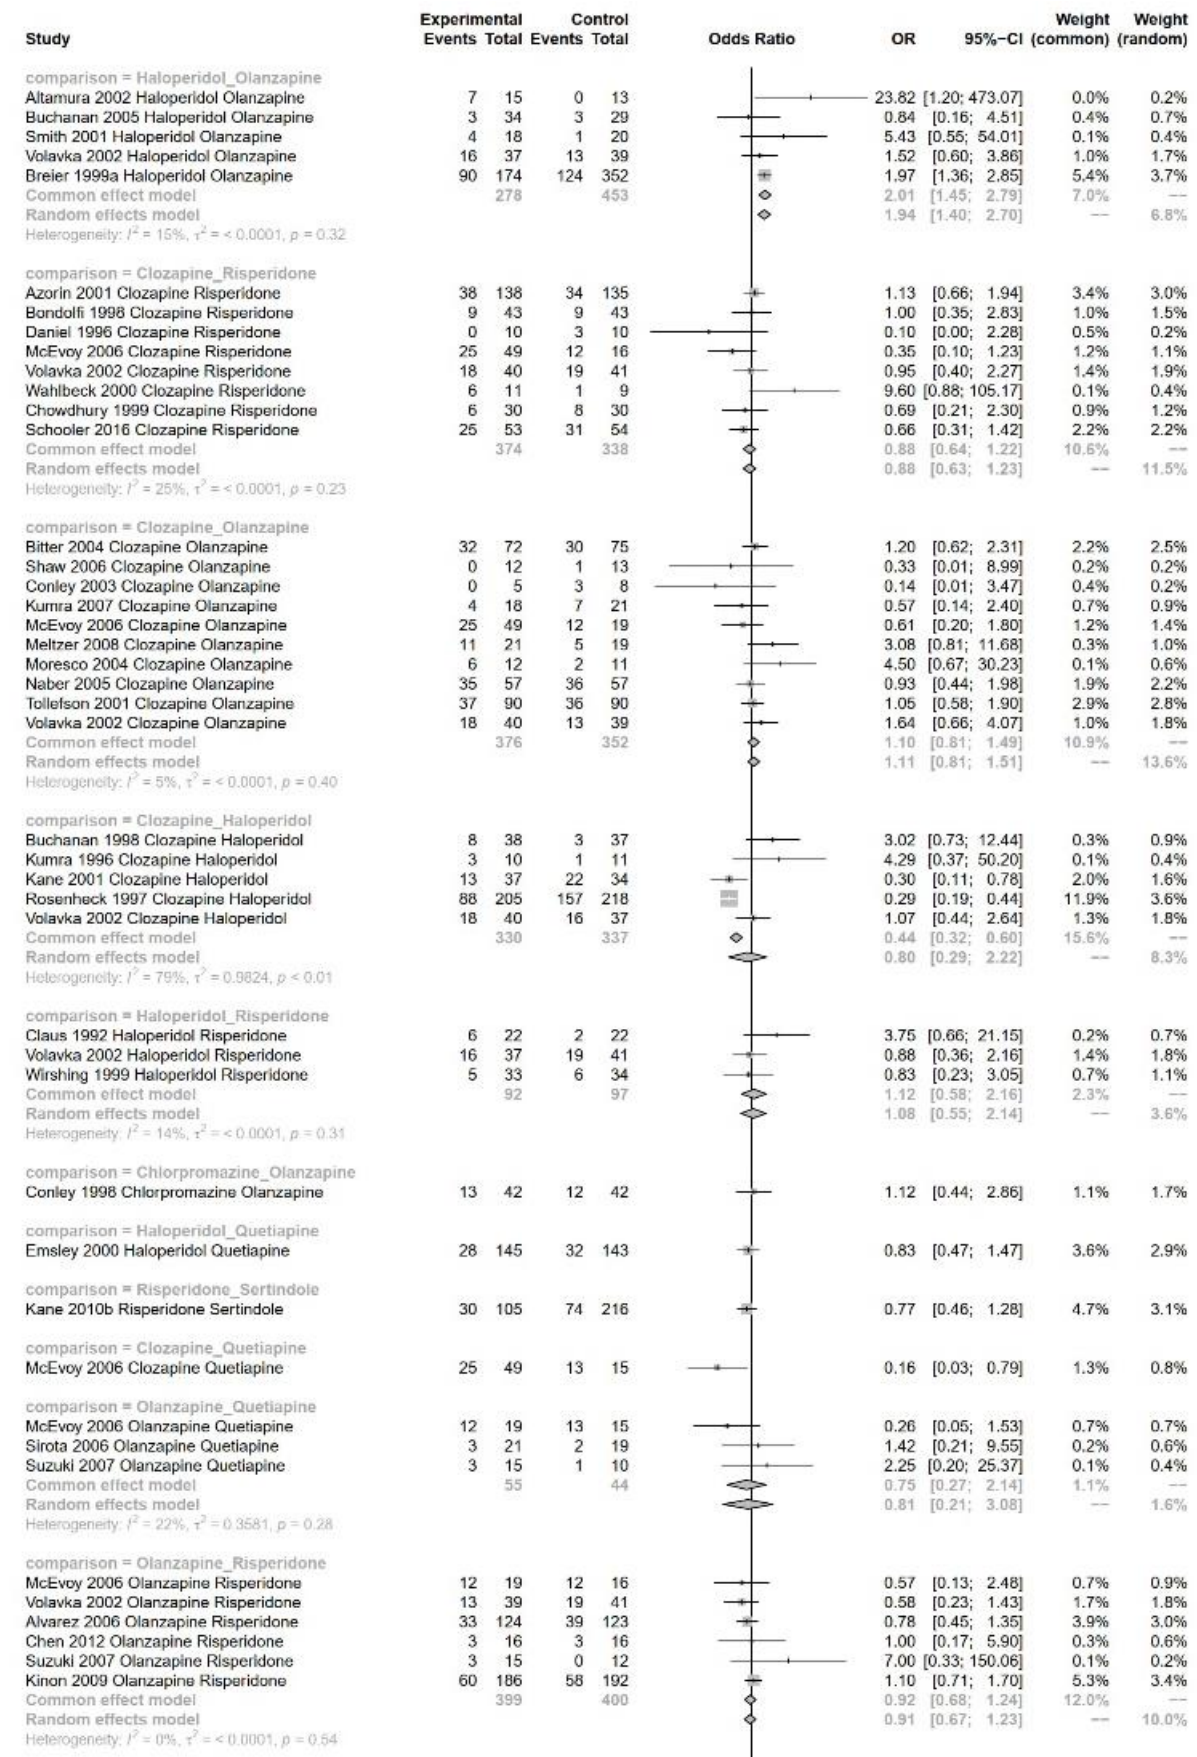

|                                                        |    |     |    |     |  |      |                |      |      |  |  |
|--------------------------------------------------------|----|-----|----|-----|--|------|----------------|------|------|--|--|
| comparison = Quetiapine_Risperidone                    |    |     |    |     |  |      |                |      |      |  |  |
| McEvoy 2006                                            | 13 | 15  | 12 | 16  |  | 2.17 | [0.33; 14.06]  | 0.2% | 0.6% |  |  |
| Conley 2005                                            | 5  | 12  | 4  | 13  |  | 1.61 | [0.31; 8.32]   | 0.3% | 0.7% |  |  |
| Suzuki 2007                                            | 1  | 10  | 0  | 12  |  | 3.95 | [0.14; 108.09] | 0.1% | 0.2% |  |  |
| Common effect model                                    |    | 37  |    | 41  |  | 2.04 | [0.65; 6.41]   | 0.6% | —    |  |  |
| Random effects model                                   |    |     |    |     |  | 2.01 | [0.63; 6.40]   | —    | 1.5% |  |  |
| Heterogeneity: $I^2 = 0\%$ , $\tau^2 = 0$ , $p = 0.89$ |    |     |    |     |  |      |                |      |      |  |  |
| comparison = Chlorpromazine_Risperidone                |    |     |    |     |  |      |                |      |      |  |  |
| Mercer 1997                                            | 1  | 12  | 2  | 15  |  | 0.59 | [0.05; 7.43]   | 0.2% | 0.3% |  |  |
| comparison = Chlorpromazine_Placebo                    |    |     |    |     |  |      |                |      |      |  |  |
| Schiele 1961, 06602                                    | 0  | 20  | 1  | 20  |  | 0.32 | [0.01; 8.26]   | 0.2% | 0.2% |  |  |
| comparison = Chlorpromazine_Thioridazine               |    |     |    |     |  |      |                |      |      |  |  |
| Schiele 1961, 06602                                    | 0  | 20  | 1  | 20  |  | 0.32 | [0.01; 8.26]   | 0.2% | 0.2% |  |  |
| comparison = Chlorpromazine_Trifluoperazine            |    |     |    |     |  |      |                |      |      |  |  |
| Schiele 1961, 06602                                    | 0  | 20  | 1  | 20  |  | 0.32 | [0.01; 8.26]   | 0.2% | 0.2% |  |  |
| comparison = Placebo_Thioridazine                      |    |     |    |     |  |      |                |      |      |  |  |
| Schiele 1961, 06602                                    | 1  | 20  | 1  | 20  |  | 1.00 | [0.06; 17.18]  | 0.1% | 0.3% |  |  |
| comparison = Placebo_Trifluoperazine                   |    |     |    |     |  |      |                |      |      |  |  |
| Schiele 1961, 06602                                    | 1  | 20  | 1  | 20  |  | 1.00 | [0.06; 17.18]  | 0.1% | 0.3% |  |  |
| Marjerrison 1964                                       | 3  | 34  | 3  | 16  |  | 0.42 | [0.07; 2.36]   | 0.5% | 0.7% |  |  |
| Common effect model                                    |    | 54  |    | 36  |  | 0.54 | [0.12; 2.35]   | 0.6% | —    |  |  |
| Random effects model                                   |    |     |    |     |  | 0.53 | [0.12; 2.32]   | —    | 0.9% |  |  |
| Heterogeneity: $I^2 = 0\%$ , $\tau^2 = 0$ , $p = 0.61$ |    |     |    |     |  |      |                |      |      |  |  |
| comparison = Thioridazine_Trifluoperazine              |    |     |    |     |  |      |                |      |      |  |  |
| Schiele 1961, 06602                                    | 1  | 20  | 1  | 20  |  | 1.00 | [0.06; 17.18]  | 0.1% | 0.3% |  |  |
| comparison = Aripiprazole_Perphenazine                 |    |     |    |     |  |      |                |      |      |  |  |
| Kane 2007a                                             | 44 | 154 | 31 | 146 |  | 1.48 | [0.87; 2.52]   | 3.1% | 3.0% |  |  |
| comparison = Chlorpromazine_Haloperidol                |    |     |    |     |  |      |                |      |      |  |  |
| Teja 1975                                              | 0  | 14  | 0  | 13  |  | 0.93 | [0.02; 50.30]  | 0.1% | 0.1% |  |  |
| McCreadie 1977                                         | 2  | 10  | 0  | 10  |  | 6.18 | [0.26; 146.78] | 0.1% | 0.2% |  |  |
| Common effect model                                    |    | 24  |    | 23  |  | 3.22 | [0.32; 32.67]  | 0.1% | —    |  |  |
| Random effects model                                   |    |     |    |     |  | 2.97 | [0.25; 35.51]  | —    | 0.4% |  |  |
| Heterogeneity: $I^2 = 0\%$ , $\tau^2 = 0$ , $p = 0.47$ |    |     |    |     |  |      |                |      |      |  |  |
| comparison = Fluphenazine_Quetiapine                   |    |     |    |     |  |      |                |      |      |  |  |
| Conley 2005                                            | 9  | 13  | 5  | 12  |  | 3.15 | [0.61; 16.31]  | 0.2% | 0.7% |  |  |
| comparison = Fluphenazine_Risperidone                  |    |     |    |     |  |      |                |      |      |  |  |
| Conley 2005                                            | 9  | 13  | 4  | 13  |  | 5.06 | [0.96; 26.78]  | 0.2% | 0.7% |  |  |
| comparison = Chlorpromazine_Clozapine                  |    |     |    |     |  |      |                |      |      |  |  |
| Hong 1997                                              | 2  | 19  | 2  | 21  |  | 1.12 | [0.14; 8.82]   | 0.2% | 0.5% |  |  |
| Honigfeld 1984b                                        | 36 | 76  | 27 | 75  |  | 1.60 | [0.83; 3.07]   | 2.0% | 2.6% |  |  |
| Kane 1988                                              | 18 | 142 | 15 | 126 |  | 1.07 | [0.52; 2.23]   | 1.9% | 2.3% |  |  |
| Common effect model                                    |    | 237 |    | 222 |  | 1.33 | [0.83; 2.13]   | 4.1% | —    |  |  |
| Random effects model                                   |    |     |    |     |  | 1.33 | [0.83; 2.13]   | —    | 5.3% |  |  |
| Heterogeneity: $I^2 = 0\%$ , $\tau^2 = 0$ , $p = 0.72$ |    |     |    |     |  |      |                |      |      |  |  |
| comparison = Chlorpromazine_Ziprasidone                |    |     |    |     |  |      |                |      |      |  |  |
| Kane 2006                                              | 19 | 154 | 16 | 152 |  | 1.20 | [0.59; 2.42]   | 1.9% | 2.4% |  |  |
| comparison = Clozapine_Zotepine                        |    |     |    |     |  |      |                |      |      |  |  |
| Meyer-Lindenberg 1997                                  | 7  | 25  | 10 | 25  |  | 0.58 | [0.18; 1.91]   | 1.0% | 1.2% |  |  |
| comparison = Clozapine_Ziprasidone                     |    |     |    |     |  |      |                |      |      |  |  |
| Sacchetti 2009                                         | 29 | 74  | 28 | 73  |  | 1.04 | [0.53; 2.01]   | 2.3% | 2.5% |  |  |
| comparison = Chlorpromazine_Levomepromazine            |    |     |    |     |  |      |                |      |      |  |  |
| Lai 2006                                               | 5  | 19  | 2  | 19  |  | 3.04 | [0.51; 18.11]  | 0.2% | 0.6% |  |  |
| comparison = Fluphenazine_Haloperidol                  |    |     |    |     |  |      |                |      |      |  |  |
| Hall 1968                                              | 5  | 25  | 5  | 25  |  | 1.00 | [0.25; 4.00]   | 0.5% | 1.0% |  |  |
| comparison = Chlorpromazine_Sulpiride                  |    |     |    |     |  |      |                |      |      |  |  |
| Toru 1972                                              | 1  | 37  | 0  | 38  |  | 3.16 | [0.12; 80.19]  | 0.1% | 0.2% |  |  |
| comparison = Amisulpride_Olanzapine                    |    |     |    |     |  |      |                |      |      |  |  |
| Kahn 2018                                              | 14 | 47  | 7  | 46  |  | 2.36 | [0.85; 6.55]   | 0.7% | 1.5% |  |  |
| comparison = Chlorpromazine_Quetiapine                 |    |     |    |     |  |      |                |      |      |  |  |
| AstraZeneca 5077IL/0031                                | 41 | 130 | 41 | 130 |  | 1.00 | [0.59; 1.69]   | 3.8% | 3.1% |  |  |
| AstraZeneca 5077IL/0054                                | 40 | 119 | 31 | 117 |  | 1.40 | [0.80; 2.46]   | 2.8% | 2.9% |  |  |
| Common effect model                                    |    | 249 |    | 247 |  | 1.17 | [0.80; 1.72]   | 6.7% | —    |  |  |
| Random effects model                                   |    |     |    |     |  | 1.17 | [0.80; 1.72]   | —    | 6.0% |  |  |
| Heterogeneity: $I^2 = 0\%$ , $\tau^2 = 0$ , $p = 0.38$ |    |     |    |     |  |      |                |      |      |  |  |
| comparison = Haloperidol_Placebo                       |    |     |    |     |  |      |                |      |      |  |  |
| Browne 1988                                            | 3  | 6   | 4  | 5   |  | 0.25 | [0.02; 3.77]   | 0.3% | 0.3% |  |  |
| comparison = Paliperidone_Paliperidone_LAI             |    |     |    |     |  |      |                |      |      |  |  |
| Actrn12618001113246                                    | 4  | 36  | 3  | 36  |  | 1.38 | [0.28; 6.64]   | 0.4% | 0.8% |  |  |
| comparison = Fluphenazine_LAI_Pipotiazine_LAI          |    |     |    |     |  |      |                |      |      |  |  |
| Schlosberg 1978                                        | 21 | 30  | 21 | 30  |  | 1.00 | [0.33; 3.02]   | 0.9% | 1.4% |  |  |
| comparison = Fluphenazine_LAI_Placebo                  |    |     |    |     |  |      |                |      |      |  |  |
| Schlosberg 1978                                        | 21 | 30  | 13 | 15  |  | 0.36 | [0.07; 1.93]   | 0.7% | 0.7% |  |  |

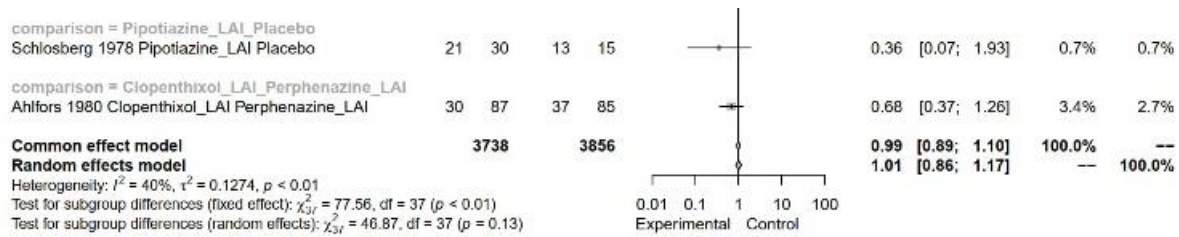

*A summary effect size is calculated by pairwise meta-analyses of all studies of a specific comparison. The type of effect size measure is OR.*

## 8.5 Discontinuation due to inefficacy

We transformed the original ORs to RRs and EERs vs. CER assuming the baseline discontinuation rate due to inefficacy with clozapine of 6% (namely CER). 6% was the average discontinuation rate due to efficacy with clozapine across all clozapine -arms in the network meta-analysis, as estimated by a single-arm meta-analysis of proportions.

### Network plot

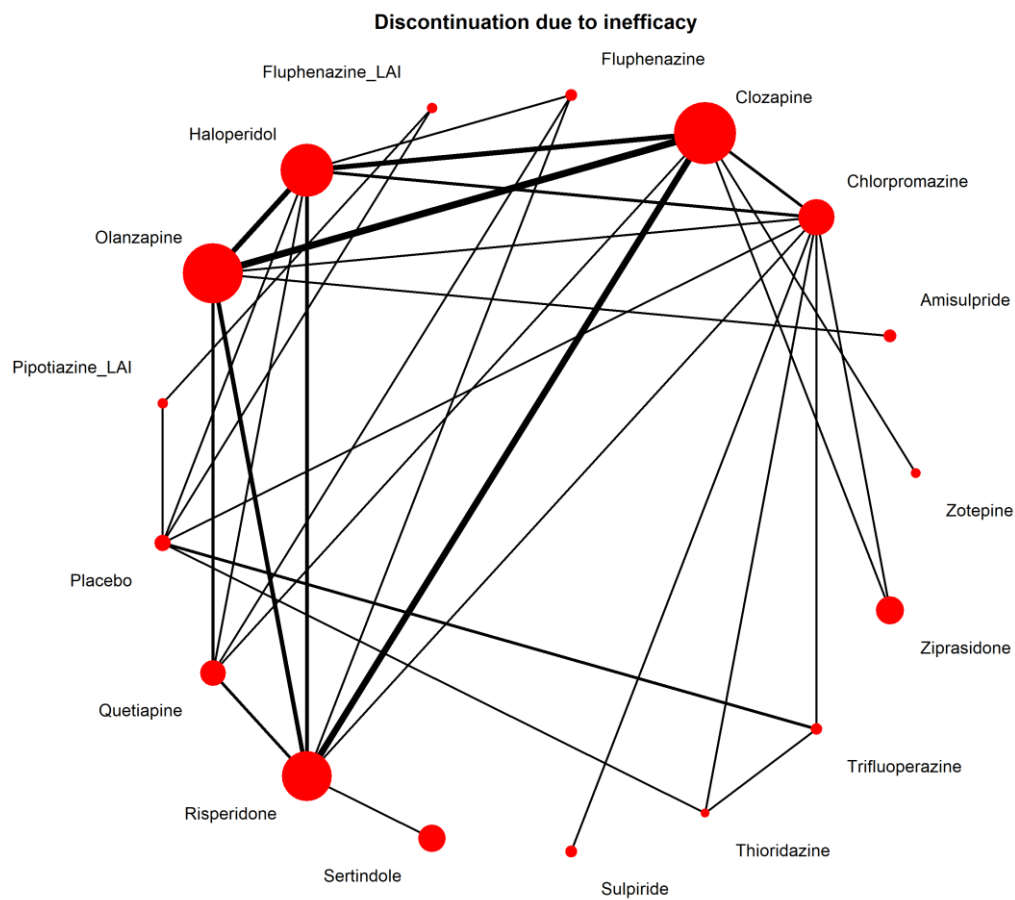

*Lines link treatments with direct comparisons in trials; thickness of lines corresponds to the number of trials evaluating the comparison; size of the nodes corresponds to the number of participants assigned to the treatment.*



### Forest-plot of results of network meta-analysis for antipsychotic drugs versus clozapine

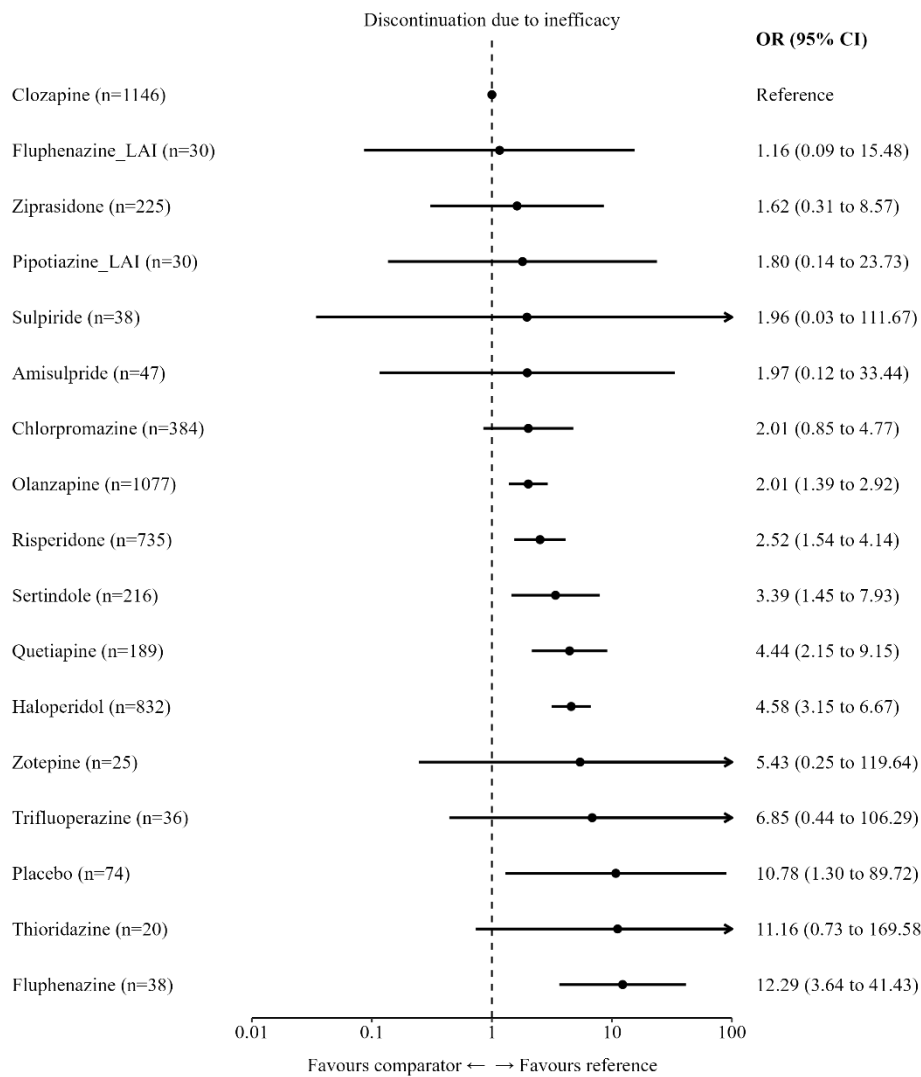

Effect sizes, measured as odds ratio (OR), are from the network meta-analysis. Order of treatments is according to the mean effect size. Reference is clozapine. The direction of the effect is indicated below the x-axis.

### Forest plot with RR and EER versus CER

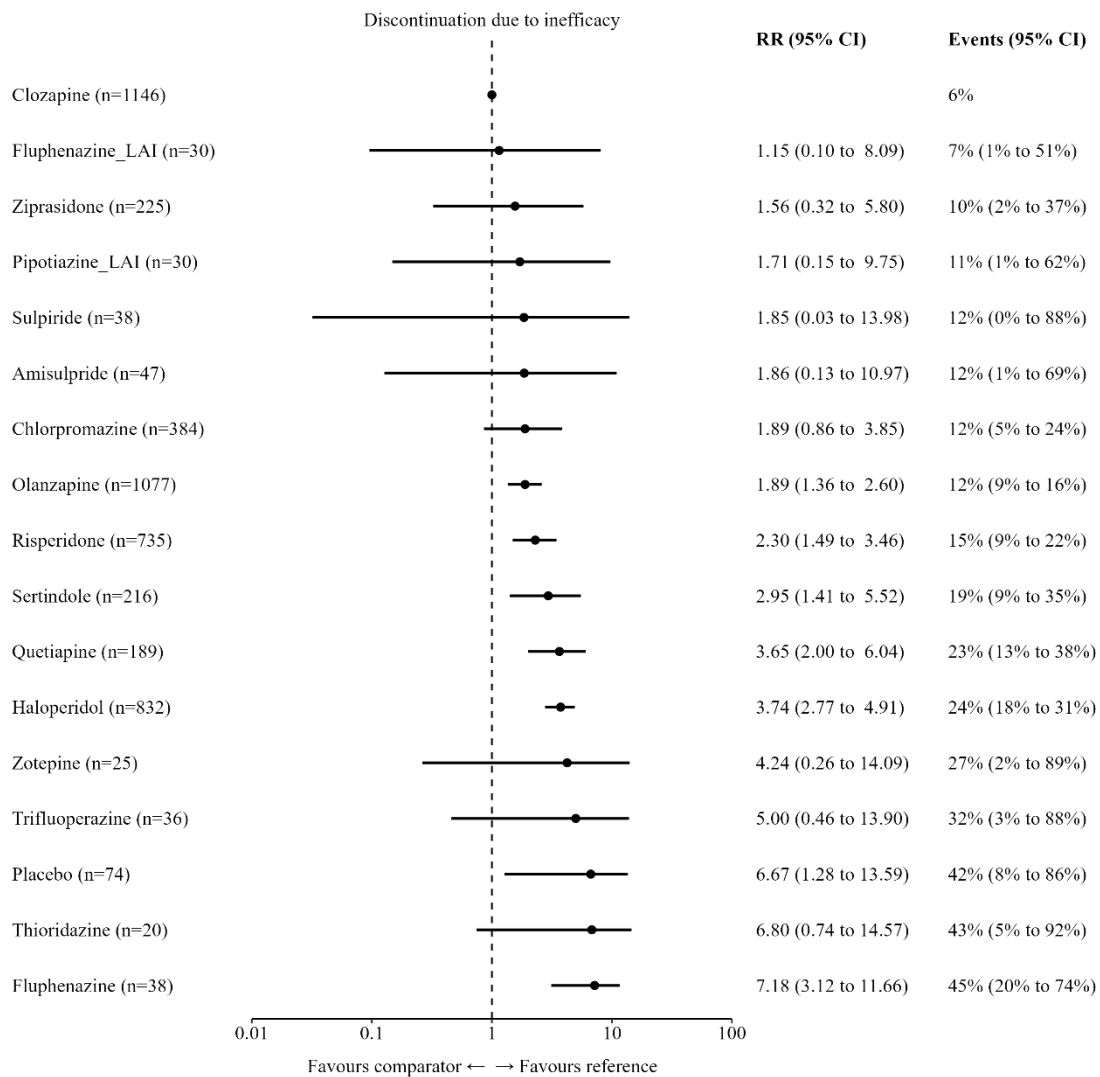

For this forest plot, we transformed the original OR to RR and exposure events rates (EER, called “events” in the forest plot) using the formula indicated above. Therefore, we used an average discontinuation rate (due to inefficacy) with clozapine of 6% as the control event rate (CER).

Effect sizes are from the network meta-analysis. Order of treatments is according to the mean effect size. Reference is clozapine. The direction of the effect is indicated below the x-axis.

### League table for the outcome: Discontinuation due to inefficacy (OR)

|                            |                            |                      |                            |                       |                      |                            |                            |                            |                      |                            |                            |                      |                      |                            |                      |                     |
|----------------------------|----------------------------|----------------------|----------------------------|-----------------------|----------------------|----------------------------|----------------------------|----------------------------|----------------------|----------------------------|----------------------------|----------------------|----------------------|----------------------------|----------------------|---------------------|
| Clozapine                  | NA                         | 0.65 (0.10 to 4.04)  | NA                         | NA                    | NA                   | 0.40 (0.12 to 1.29)        | 0.77 (0.47 to 1.25)        | <b>0.31 (0.17 to 0.57)</b> | NA                   | <b>0.17 (0.04 to 0.69)</b> | <b>0.16 (0.10 to 0.27)</b> | 0.18 (0.01 to 4.06)  | NA                   | NA                         | NA                   | NA                  |
| 0.87 (0.06 to 11.59)       | Fluphenazine LAI           | NA                   | 0.64 (0.22 to 1.90)        | NA                    | NA                   | NA                         | NA                         | NA                         | NA                   | NA                         | NA                         | NA                   | NA                   | <b>0.11 (0.02 to 0.48)</b> | NA                   | NA                  |
| 0.62 (0.12 to 3.26)        | 0.71 (0.03 to 15.26)       | Ziprasidone          | NA                         | NA                    | NA                   | 1.01 (0.02 to 51.61)       | NA                         | NA                         | NA                   | NA                         | NA                         | NA                   | NA                   | NA                         | NA                   | NA                  |
| 0.56 (0.04 to 7.34)        | 0.64 (0.22 to 1.90)        | 0.90 (0.04 to 19.07) | Pipofiazine LAI            | NA                    | NA                   | NA                         | NA                         | NA                         | NA                   | NA                         | NA                         | NA                   | NA                   | <b>0.17 (0.04 to 0.73)</b> | NA                   | NA                  |
| 0.51 (0.01 to 29.12)       | 0.59 (0.01 to 67.10)       | 0.83 (0.01 to 63.66) | 0.92 (0.01 to 103.54)      | Sulpiride             | NA                   | 0.97 (0.02 to 50.59)       | NA                         | NA                         | NA                   | NA                         | NA                         | NA                   | NA                   | NA                         | NA                   | NA                  |
| 0.51 (0.03 to 8.64)        | 0.59 (0.01 to 26.88)       | 0.82 (0.03 to 21.97) | 0.91 (0.02 to 41.40)       | 1.00 (0.01 to 137.34) | Amisulpride          | NA                         | 0.98 (0.06 to 16.22)       | NA                         | NA                   | NA                         | NA                         | NA                   | NA                   | NA                         | NA                   | NA                  |
| 0.50 (0.21 to 1.18)        | 0.57 (0.04 to 7.80)        | 0.81 (0.13 to 4.90)  | 0.89 (0.07 to 11.96)       | 0.97 (0.02 to 50.59)  | 0.98 (0.05 to 18.62) | Chlorpromazine             | 0.37 (0.07 to 2.05)        | 1.24 (0.02 to 67.33)       | NA                   | NA                         | 0.96 (0.06 to 16.38)       | NA                   | 1.00 (0.02 to 53.08) | 0.32 (0.01 to 8.30)        | 0.32 (0.01 to 8.30)  | NA                  |
| <b>0.50 (0.34 to 0.72)</b> | 0.57 (0.04 to 7.70)        | 0.81 (0.15 to 4.42)  | 0.89 (0.07 to 11.80)       | 0.97 (0.02 to 55.81)  | 0.98 (0.06 to 16.22) | 1.00 (0.41 to 2.43)        | Olanzapine                 | 1.19 (0.51 to 2.76)        | NA                   | 0.73 (0.20 to 2.61)        | <b>0.53 (0.35 to 0.78)</b> | NA                   | NA                   | NA                         | NA                   | NA                  |
| <b>0.40 (0.24 to 0.65)</b> | 0.46 (0.03 to 6.32)        | 0.64 (0.11 to 3.64)  | 0.71 (0.05 to 9.68)        | 0.78 (0.01 to 45.24)  | 0.78 (0.04 to 13.57) | 0.80 (0.30 to 2.09)        | 0.80 (0.47 to 1.35)        | Risperidone                | 0.74 (0.37 to 1.48)  | 0.90 (0.29 to 2.83)        | <b>0.33 (0.12 to 0.90)</b> | NA                   | NA                   | NA                         | NA                   | 0.19 (0.03 to 1.04) |
| <b>0.29 (0.13 to 0.69)</b> | 0.34 (0.02 to 5.14)        | 0.48 (0.07 to 3.09)  | 0.53 (0.04 to 7.88)        | 0.58 (0.01 to 35.69)  | 0.58 (0.03 to 10.97) | 0.59 (0.18 to 1.94)        | 0.59 (0.25 to 1.41)        | 0.74 (0.37 to 1.48)        | Sertindole           | NA                         | NA                         | NA                   | NA                   | NA                         | NA                   | NA                  |
| <b>0.23 (0.11 to 0.46)</b> | 0.26 (0.02 to 3.75)        | 0.37 (0.06 to 2.24)  | 0.41 (0.03 to 5.75)        | 0.44 (0.01 to 26.61)  | 0.44 (0.02 to 8.04)  | 0.45 (0.15 to 1.35)        | <b>0.45 (0.22 to 0.93)</b> | 0.57 (0.26 to 1.23)        | 0.76 (0.27 to 2.15)  | Quetiapine                 | 1.43 (0.55 to 3.73)        | NA                   | NA                   | NA                         | NA                   | 0.21 (0.04 to 1.17) |
| <b>0.22 (0.15 to 0.32)</b> | 0.25 (0.02 to 3.34)        | 0.35 (0.06 to 1.94)  | 0.39 (0.03 to 5.12)        | 0.43 (0.01 to 24.55)  | 0.43 (0.03 to 7.27)  | 0.44 (0.18 to 1.08)        | <b>0.44 (0.31 to 0.61)</b> | <b>0.55 (0.33 to 0.93)</b> | 0.74 (0.31 to 1.76)  | 0.97 (0.49 to 1.92)        | Haloperidol                | NA                   | NA                   | 0.25 (0.02 to 3.79)        | NA                   | 0.64 (0.10 to 4.23) |
| 0.18 (0.01 to 4.06)        | 0.21 (0.00 to 12.07)       | 0.30 (0.01 to 10.02) | 0.33 (0.01 to 18.60)       | 0.36 (0.00 to 58.66)  | 0.36 (0.01 to 24.05) | 0.37 (0.01 to 9.20)        | 0.37 (0.02 to 8.36)        | 0.47 (0.02 to 10.67)       | 0.62 (0.03 to 15.45) | 0.82 (0.03 to 19.60)       | 0.84 (0.04 to 19.04)       | Zotepine             | NA                   | NA                         | NA                   | NA                  |
| 0.15 (0.01 to 2.26)        | 0.17 (0.01 to 1.99)        | 0.24 (0.01 to 5.72)  | 0.26 (0.02 to 3.05)        | 0.29 (0.00 to 34.95)  | 0.29 (0.01 to 14.54) | 0.29 (0.02 to 4.54)        | 0.29 (0.02 to 4.55)        | 0.37 (0.02 to 5.87)        | 0.49 (0.03 to 8.59)  | 0.65 (0.04 to 10.76)       | 0.67 (0.04 to 10.27)       | 0.79 (0.01 to 49.37) | Trifluoperazine      | 0.68 (0.09 to 4.94)        | 0.32 (0.01 to 8.30)  | NA                  |
| <b>0.09 (0.01 to 0.77)</b> | <b>0.11 (0.02 to 0.48)</b> | 0.15 (0.01 to 2.18)  | <b>0.17 (0.04 to 0.73)</b> | 0.18 (0.00 to 16.18)  | 0.18 (0.01 to 6.15)  | 0.19 (0.02 to 1.58)        | 0.19 (0.02 to 1.55)        | 0.23 (0.03 to 2.02)        | 0.31 (0.03 to 3.02)  | 0.41 (0.05 to 3.74)        | 0.42 (0.05 to 3.49)        | 0.50 (0.01 to 21.38) | 0.64 (0.09 to 4.53)  | Placebo                    | 1.00 (0.09 to 10.55) | NA                  |
| 0.09 (0.01 to 1.36)        | 0.10 (0.01 to 1.47)        | 0.15 (0.01 to 3.45)  | 0.16 (0.01 to 2.26)        | 0.18 (0.00 to 21.00)  | 0.18 (0.00 to 8.82)  | 0.18 (0.01 to 2.68)        | 0.18 (0.01 to 2.75)        | 0.23 (0.01 to 3.54)        | 0.30 (0.02 to 5.18)  | 0.40 (0.02 to 6.49)        | 0.41 (0.03 to 6.20)        | 0.49 (0.01 to 29.94) | 0.61 (0.04 to 8.46)  | 0.97 (0.11 to 8.65)        | Thioridazine         | NA                  |
| <b>0.08 (0.02 to 0.27)</b> | 0.09 (0.01 to 1.61)        | 0.13 (0.02 to 1.03)  | 0.15 (0.01 to 2.47)        | 0.16 (0.00 to 10.77)  | 0.16 (0.01 to 3.41)  | <b>0.16 (0.04 to 0.71)</b> | <b>0.16 (0.05 to 0.55)</b> | <b>0.21 (0.06 to 0.69)</b> | 0.28 (0.07 to 1.11)  | 0.36 (0.10 to 1.25)        | 0.37 (0.11 to 1.23)        | 0.44 (0.02 to 12.26) | 0.56 (0.03 to 10.93) | 0.88 (0.08 to 9.79)        | 0.91 (0.05 to 17.50) | Fluphenazine        |

Treatments are presented in order of efficacy ranking. Results of the network meta-analysis are reported in the left lower half and results of pairwise meta-analyses in the right upper half. Each cell provides the effect estimate and the corresponding 95% credible interval (95% CI) of a comparison (left lower half: treatment in column versus treatment in row; right upper half: treatment in row versus treatment in column). The type of effect size measure is odd ratio (OR). Bold results indicate 95% CI excluding no effect. NA=not available.

**League table for the outcome: Discontinuation due to inefficacy (RR)**

|                            |                            |                     |                            |                     |                     |                            |                            |                            |                     |                            |                            |                     |                     |                            |                     |                     |
|----------------------------|----------------------------|---------------------|----------------------------|---------------------|---------------------|----------------------------|----------------------------|----------------------------|---------------------|----------------------------|----------------------------|---------------------|---------------------|----------------------------|---------------------|---------------------|
| Clozapine                  | NA                         | 0.67 (0.11 to 3.1)  | NA                         | NA                  | NA                  | 0.43 (0.13 to 1.25)        | 0.79 (0.5 to 1.21)         | <b>0.35 (0.19 to 0.61)</b> | NA                  | <b>0.21 (0.05 to 0.74)</b> | <b>0.2 (0.13 to 0.33)</b>  | 0.23 (0.01 to 2.2)  | NA                  | NA                         | NA                  | NA                  |
| 0.88 (0.06 to 6.51)        | Fluphenazine LAI           | NA                  | 0.67 (0.24 to 1.73)        | NA                  | NA                  | NA                         | NA                         | NA                         | NA                  | NA                         | NA                         | NA                  | NA                  | <b>0.18 (0.03 to 0.62)</b> | NA                  | NA                  |
| 0.64 (0.13 to 2.66)        | 0.73 (0.03 to 6.28)        | Ziprasidone         | NA                         | NA                  | NA                  | 1.01 (0.02 to 7.15)        | NA                         | NA                         | NA                  | NA                         | NA                         | NA                  | NA                  | NA                         | NA                  | NA                  |
| 0.59 (0.04 to 4.32)        | 0.67 (0.24 to 1.73)        | 0.91 (0.04 to 6.36) | Pipofiazine LAI            | NA                  | NA                  | NA                         | NA                         | NA                         | NA                  | NA                         | NA                         | NA                  | NA                  | <b>0.26 (0.07 to 0.83)</b> | NA                  | NA                  |
| 0.54 (0.01 to 6.64)        | 0.62 (0.01 to 7.49)        | 0.85 (0.01 to 7.45) | 0.93 (0.01 to 7.75)        | Sulpiride           | NA                  | 0.97 (0.02 to 7.13)        | NA                         | NA                         | NA                  | NA                         | NA                         | NA                  | NA                  | NA                         | NA                  | NA                  |
| 0.54 (0.03 to 4.5)         | 0.62 (0.01 to 6.53)        | 0.84 (0.03 to 7.06) | 0.92 (0.02 to 7.88)        | 1 (0.01 to 7.88)    | Amisulpride         | NA                         | 0.98 (0.07 to 5.65)        | NA                         | NA                  | NA                         | NA                         | NA                  | NA                  | NA                         | NA                  | NA                  |
| 0.53 (0.23 to 1.15)        | 0.6 (0.05 to 4.25)         | 0.83 (0.15 to 3.31) | 0.9 (0.08 to 5.1)          | 0.97 (0.02 to 7.13) | 0.98 (0.06 to 5.88) | Chlorpromazine             | 0.4 (0.08 to 1.82)         | 1.2 (0.02 to 6.18)         | NA                  | NA                         | 0.97 (0.08 to 3.47)        | NA                  | 1 (0.03 to 2.99)    | 0.45 (0.02 to 2)           | 0.46 (0.02 to 1.98) | NA                  |
| <b>0.53 (0.37 to 0.75)</b> | 0.6 (0.05 to 4.22)         | 0.83 (0.17 to 3.11) | 0.9 (0.08 to 5.07)         | 0.97 (0.02 to 7.21) | 0.98 (0.07 to 5.65) | 1 (0.44 to 2.07)           | Olanzapine                 | 1.16 (0.55 to 2.19)        | NA                  | 0.78 (0.25 to 1.89)        | <b>0.6 (0.42 to 0.82)</b>  | NA                  | NA                  | NA                         | NA                  | NA                  |
| <b>0.44 (0.27 to 0.69)</b> | 0.5 (0.04 to 3.52)         | 0.68 (0.13 to 2.61) | 0.74 (0.06 to 4.22)        | 0.81 (0.01 to 5.96) | 0.81 (0.05 to 4.72) | 0.82 (0.33 to 1.8)         | 0.82 (0.51 to 1.28)        | Risperidone                | 0.78 (0.42 to 1.36) | 0.92 (0.35 to 1.98)        | <b>0.39 (0.15 to 0.92)</b> | NA                  | NA                  | NA                         | NA                  | 0.3 (0.05 to 1.02)  |
| <b>0.34 (0.16 to 0.73)</b> | 0.39 (0.02 to 2.87)        | 0.53 (0.09 to 2.21) | 0.58 (0.05 to 3.41)        | 0.63 (0.01 to 4.69) | 0.63 (0.04 to 3.78) | 0.64 (0.21 to 1.65)        | 0.64 (0.29 to 1.31)        | 0.78 (0.42 to 1.36)        | Sertindole          | NA                         | NA                         | NA                  | NA                  | NA                         | NA                  | NA                  |
| <b>0.28 (0.14 to 0.53)</b> | 0.32 (0.03 to 2.27)        | 0.43 (0.08 to 1.73) | 0.48 (0.04 to 2.71)        | 0.51 (0.01 to 3.78) | 0.51 (0.03 to 3.02) | 0.52 (0.19 to 1.25)        | <b>0.52 (0.27 to 0.95)</b> | 0.63 (0.32 to 1.17)        | 0.81 (0.33 to 1.69) | Quetiapine                 | 1.3 (0.62 to 2.25)         | NA                  | NA                  | NA                         | NA                  | 0.33 (0.07 to 1.08) |
| <b>0.27 (0.19 to 0.38)</b> | 0.31 (0.03 to 2.13)        | 0.42 (0.08 to 1.58) | 0.46 (0.04 to 2.57)        | 0.5 (0.01 to 3.67)  | 0.5 (0.04 to 2.89)  | 0.51 (0.22 to 1.06)        | <b>0.51 (0.37 to 0.67)</b> | <b>0.62 (0.39 to 0.95)</b> | 0.79 (0.37 to 1.49) | 0.98 (0.56 to 1.57)        | Haloperidol                | NA                  | NA                  | 0.37 (0.03 to 1.72)        | NA                  | 0.77 (0.17 to 1.7)  |
| 0.23 (0.01 to 2.2)         | 0.27 (0 to 2.98)           | 0.37 (0.01 to 2.88) | 0.4 (0.01 to 3.19)         | 0.44 (0 to 3.48)    | 0.44 (0.01 to 3.28) | 0.45 (0.01 to 2.83)        | 0.45 (0.03 to 2.76)        | 0.55 (0.03 to 2.92)        | 0.69 (0.04 to 3.11) | 0.86 (0.04 to 3.21)        | 0.88 (0.05 to 3.19)        | Zotepine            | NA                  | NA                         | NA                  | NA                  |
| 0.21 (0.01 to 1.61)        | 0.23 (0.01 to 1.51)        | 0.32 (0.01 to 2.27) | 0.34 (0.03 to 1.84)        | 0.38 (0 to 2.93)    | 0.38 (0.01 to 2.71) | 0.38 (0.03 to 2.12)        | 0.38 (0.03 to 2.12)        | 0.46 (0.03 to 2.28)        | 0.59 (0.04 to 2.49) | 0.73 (0.06 to 2.6)         | 0.75 (0.06 to 2.58)        | 0.85 (0.01 to 2.98) | Trifluoperazine     | 0.79 (0.15 to 1.83)        | 0.46 (0.02 to 1.98) | NA                  |
| <b>0.15 (0.02 to 0.85)</b> | <b>0.18 (0.03 to 0.62)</b> | 0.24 (0.02 to 1.44) | <b>0.26 (0.07 to 0.83)</b> | 0.28 (0 to 2.14)    | 0.28 (0.02 to 1.91) | 0.29 (0.03 to 1.26)        | 0.29 (0.03 to 1.25)        | 0.34 (0.05 to 1.4)         | 0.44 (0.05 to 1.61) | 0.55 (0.08 to 1.71)        | 0.56 (0.08 to 1.68)        | 0.64 (0.02 to 2.18) | 0.76 (0.15 to 1.8)  | Placebo                    | 1 (0.15 to 2.04)    | NA                  |
| 0.15 (0.02 to 1.18)        | 0.16 (0.02 to 1.22)        | 0.24 (0.02 to 1.67) | 0.25 (0.02 to 1.46)        | 0.28 (0 to 2.16)    | 0.28 (0 to 2)       | 0.28 (0.02 to 1.55)        | 0.28 (0.02 to 1.56)        | 0.35 (0.02 to 1.68)        | 0.43 (0.03 to 1.83) | 0.54 (0.03 to 1.91)        | 0.55 (0.05 to 1.89)        | 0.63 (0.02 to 2.19) | 0.74 (0.07 to 1.99) | 0.98 (0.18 to 1.99)        | Thioridazine        | NA                  |
| <b>0.14 (0.04 to 0.41)</b> | 0.16 (0.02 to 1.26)        | 0.22 (0.04 to 1.02) | 0.25 (0.02 to 1.47)        | 0.26 (0 to 1.95)    | 0.26 (0.02 to 1.61) | <b>0.26 (0.07 to 0.82)</b> | <b>0.26 (0.09 to 0.69)</b> | <b>0.33 (0.11 to 0.81)</b> | 0.42 (0.12 to 1.06) | 0.51 (0.17 to 1.12)        | 0.52 (0.19 to 1.11)        | 0.59 (0.04 to 1.97) | 0.7 (0.05 to 1.95)  | 0.93 (0.14 to 1.93)        | 0.95 (0.09 to 2.03) | Fluphenazine        |

The original results given in OR (and their 95% CI) are transformed to RR (left lower half: treatment in column versus treatment in row; right upper half: treatment in row versus treatment in column) using the formula described above. For this transformation, we assumed a discontinuation rate (due to inefficacy) with clozapine of 6% as the control event rate (CER) for all comparisons of active antipsychotic versus clozapine.

Treatments are presented in order of efficacy ranking. Results of the network meta-analysis are reported in the left lower half and results of pairwise meta-analyses in the right upper half. Bold results indicate 95% CI excluding no effect. NA=not available.

## Forest plot of results of pairwise meta-analyses

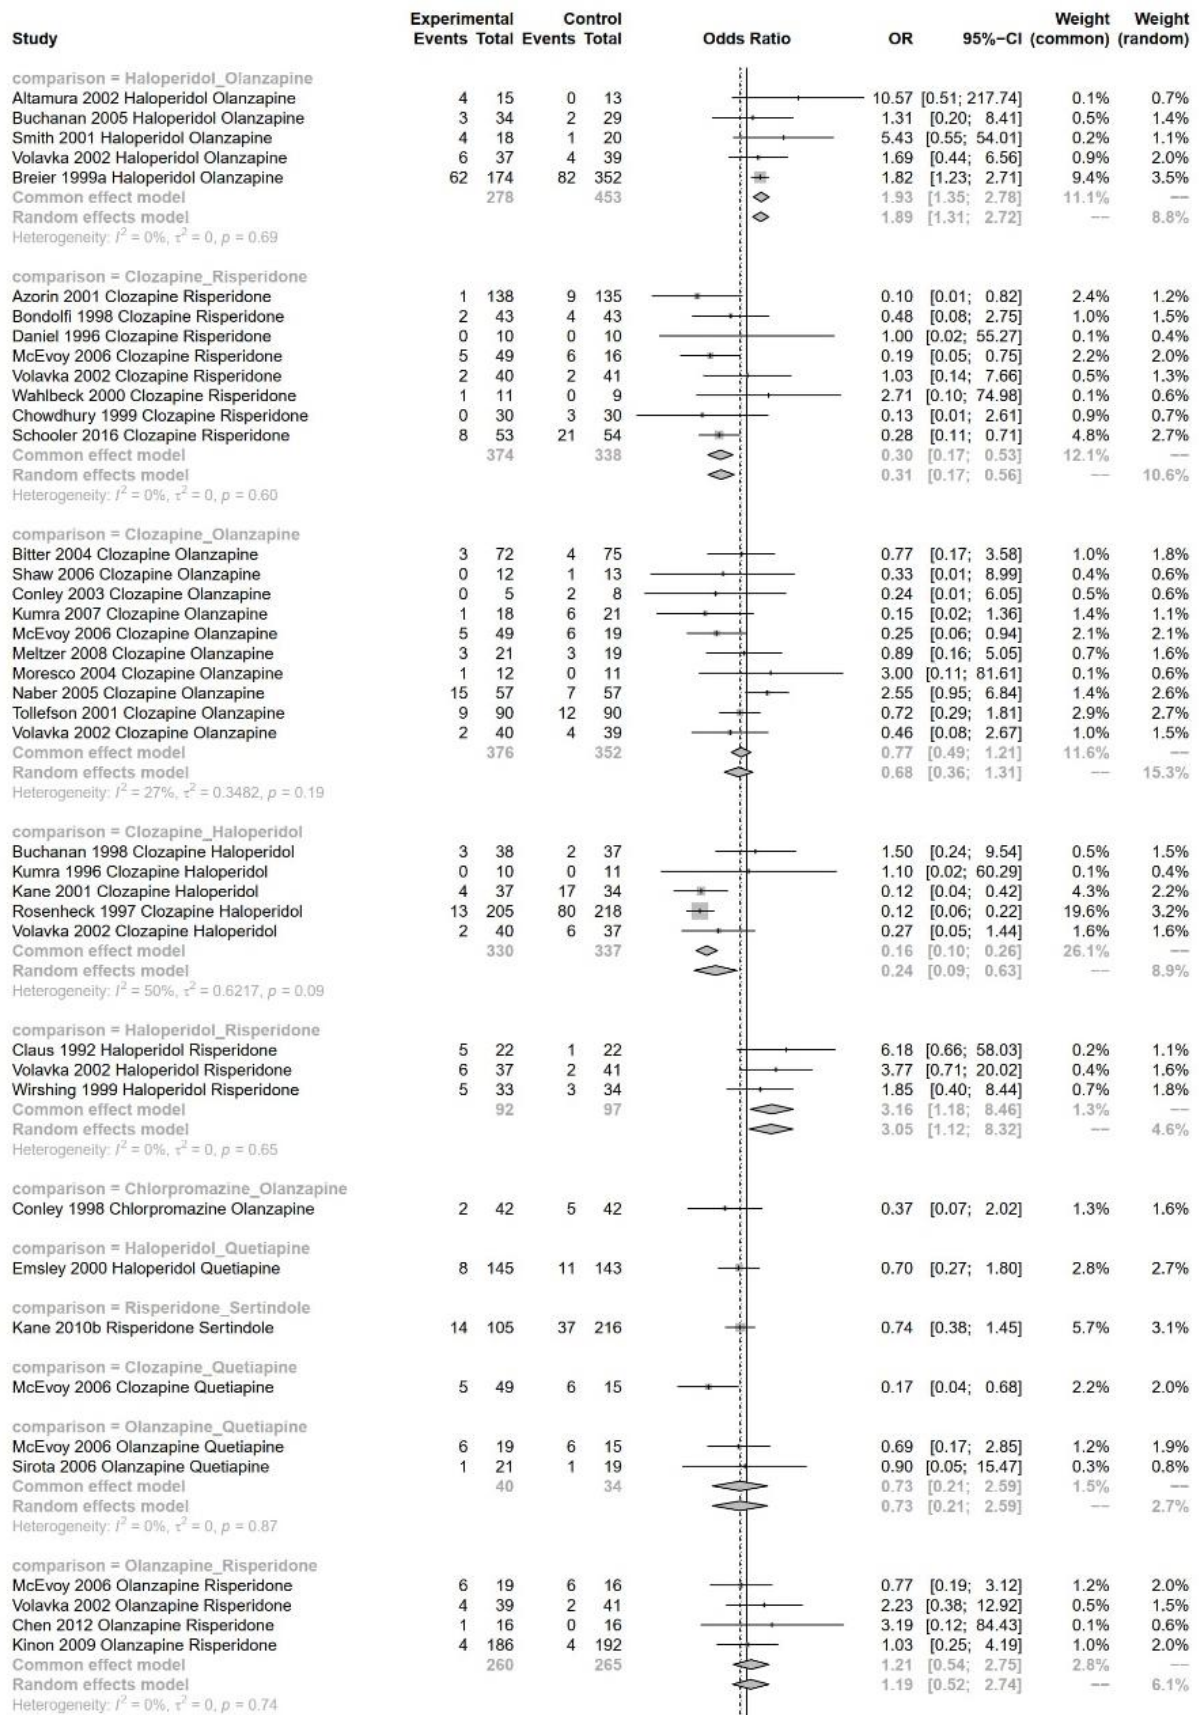

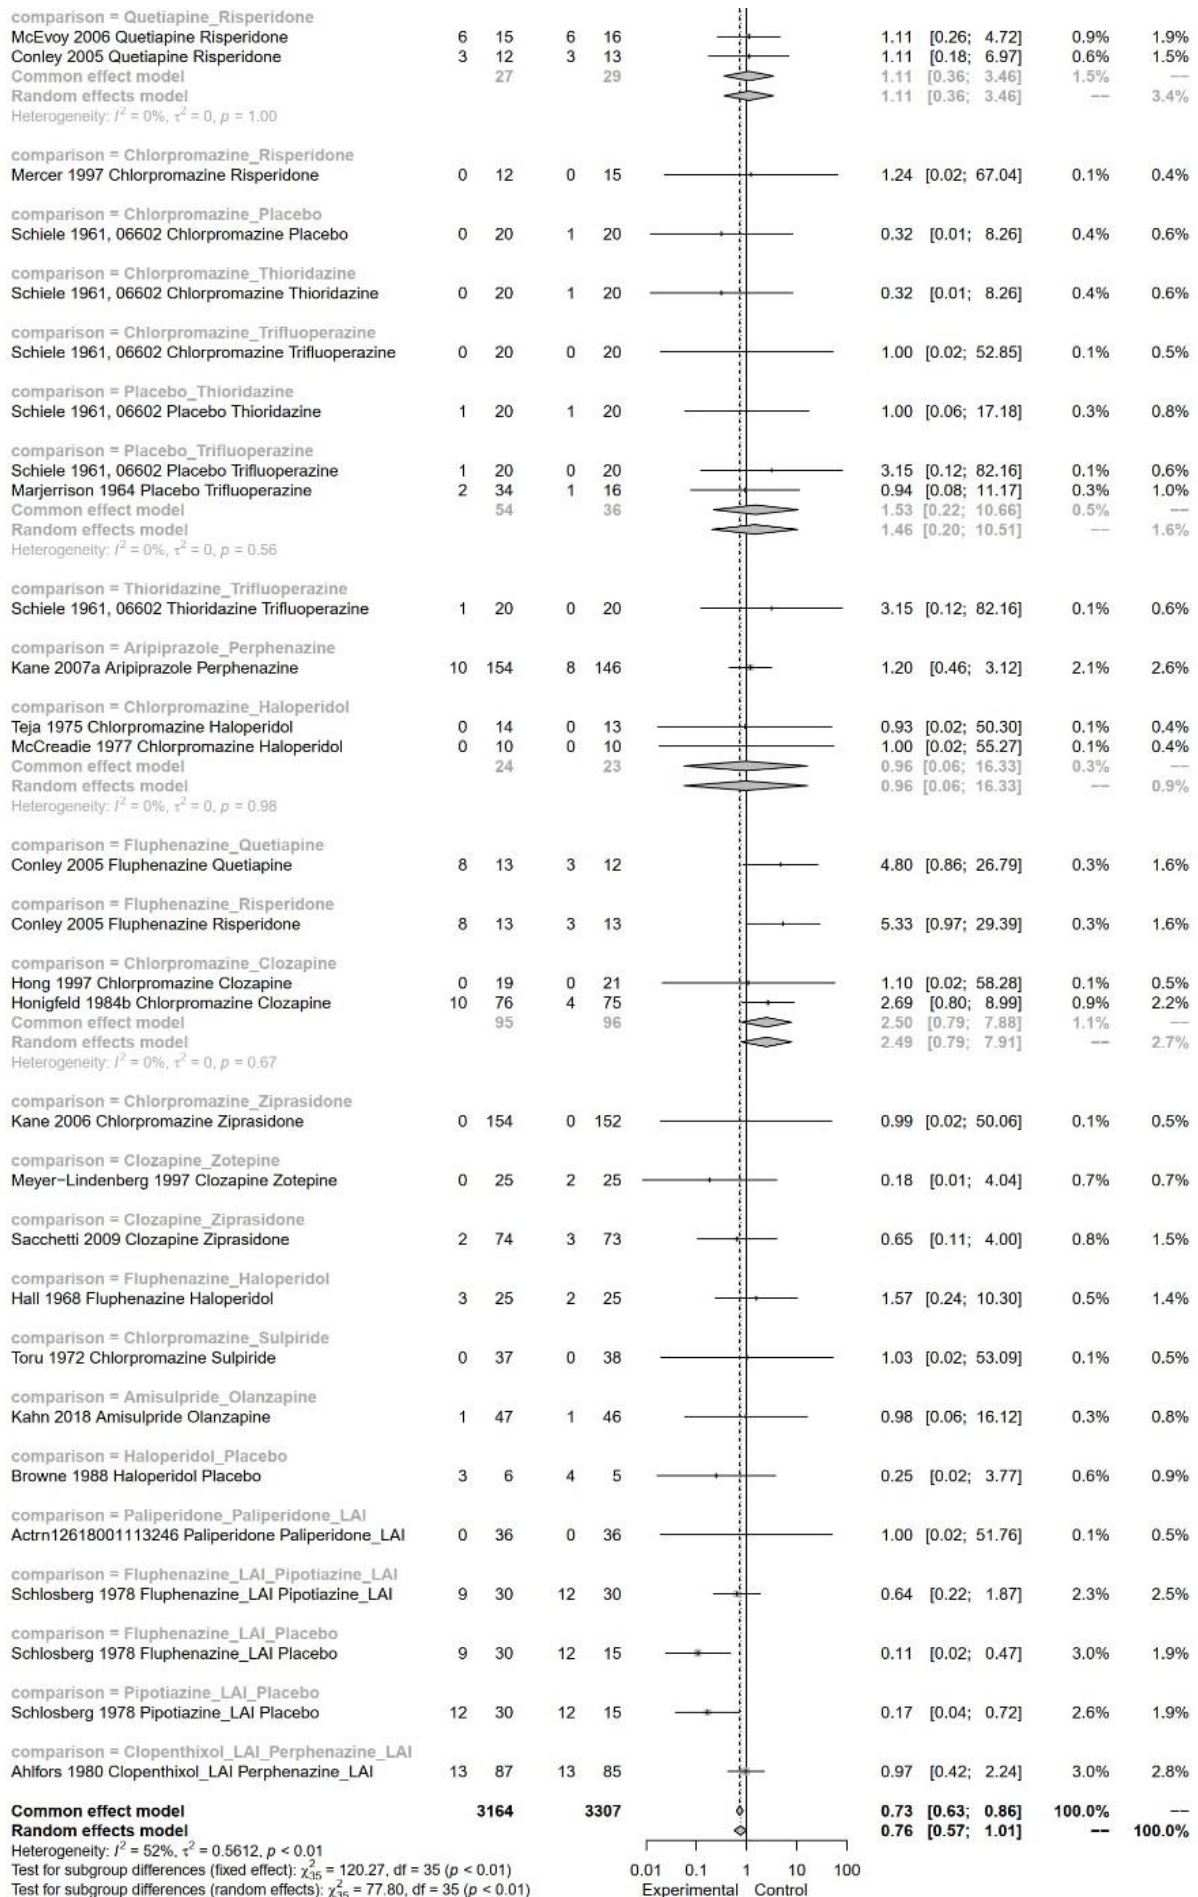

*A summary effect size is calculated by pairwise meta-analyses of all studies of a specific comparison. The type of effect size measure is OR.*

## 8.6 Discontinuation due to adverse events

We transformed the original ORs to RRs and EERs vs. CER assuming the baseline discontinuation rate due to adverse events with clozapine of 12% (namely CER). 12% was the average discontinuation rate due to adverse events with clozapine across all clozapine -arms in the network meta-analysis, as estimated by a single-arm meta-analysis of proportions.

### Network plot

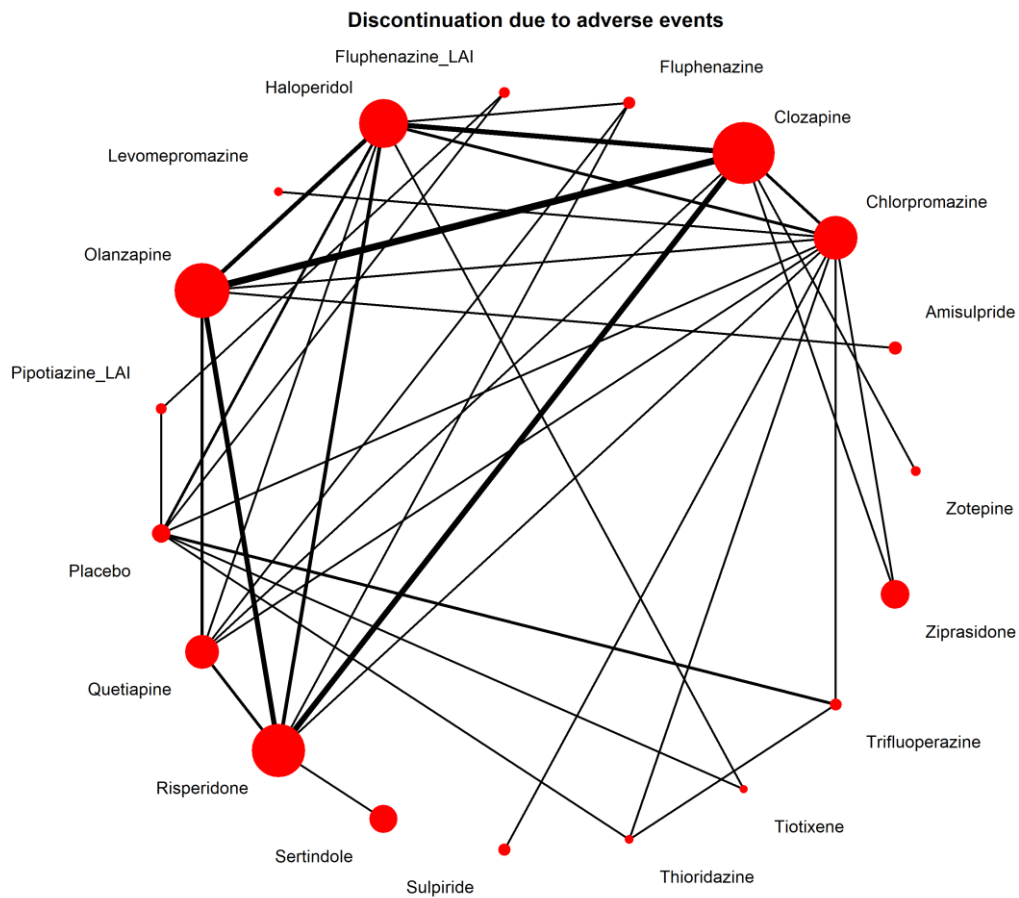

*Lines link treatments with direct comparisons in trials; thickness of lines corresponds to the number of trials evaluating the comparison; size of the nodes corresponds to the number of participants assigned to the treatment.*



**Forest-plot of results of network meta-analysis for antipsychotic drugs versus clozapine**

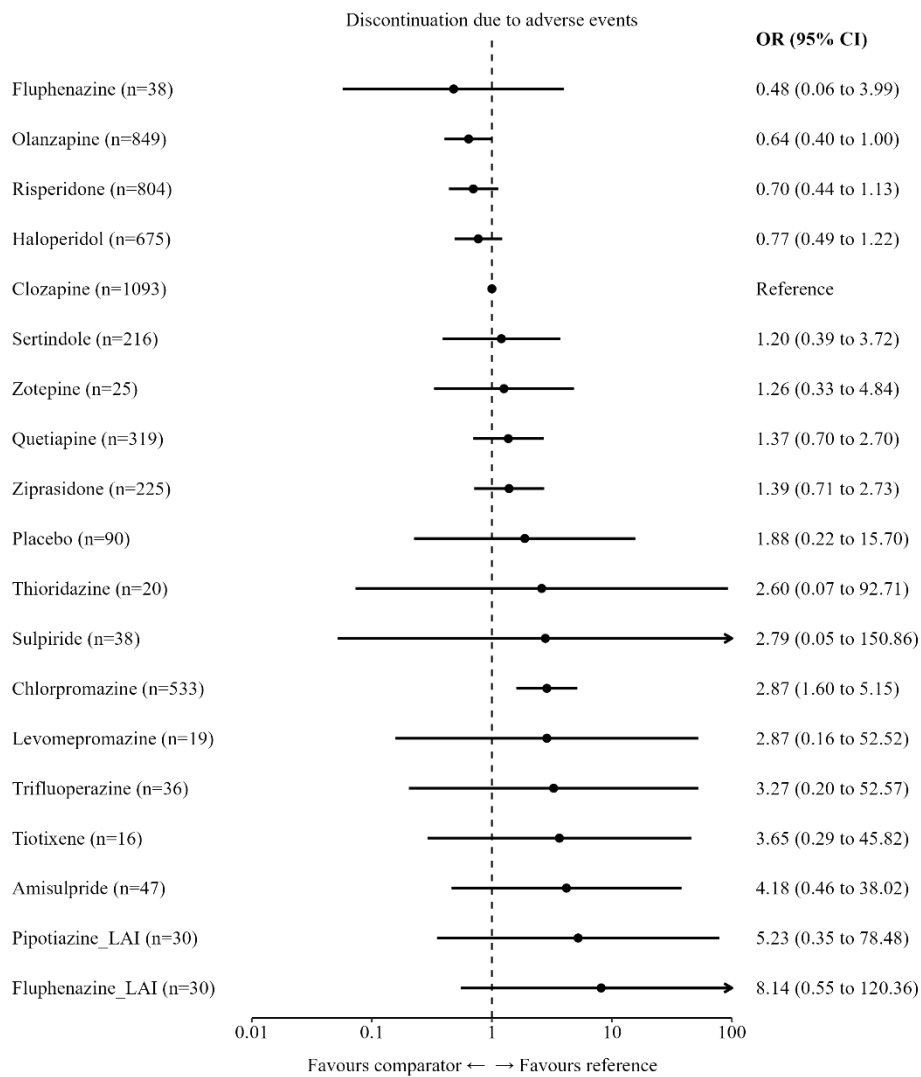

Effect sizes, measured as odds ratio (OR), are from the network meta-analysis. Order of treatments is according to the mean effect size. Reference is clozapine. The direction of the effect is indicated below the x-axis.

### Forest plot with RR and EER versus CER

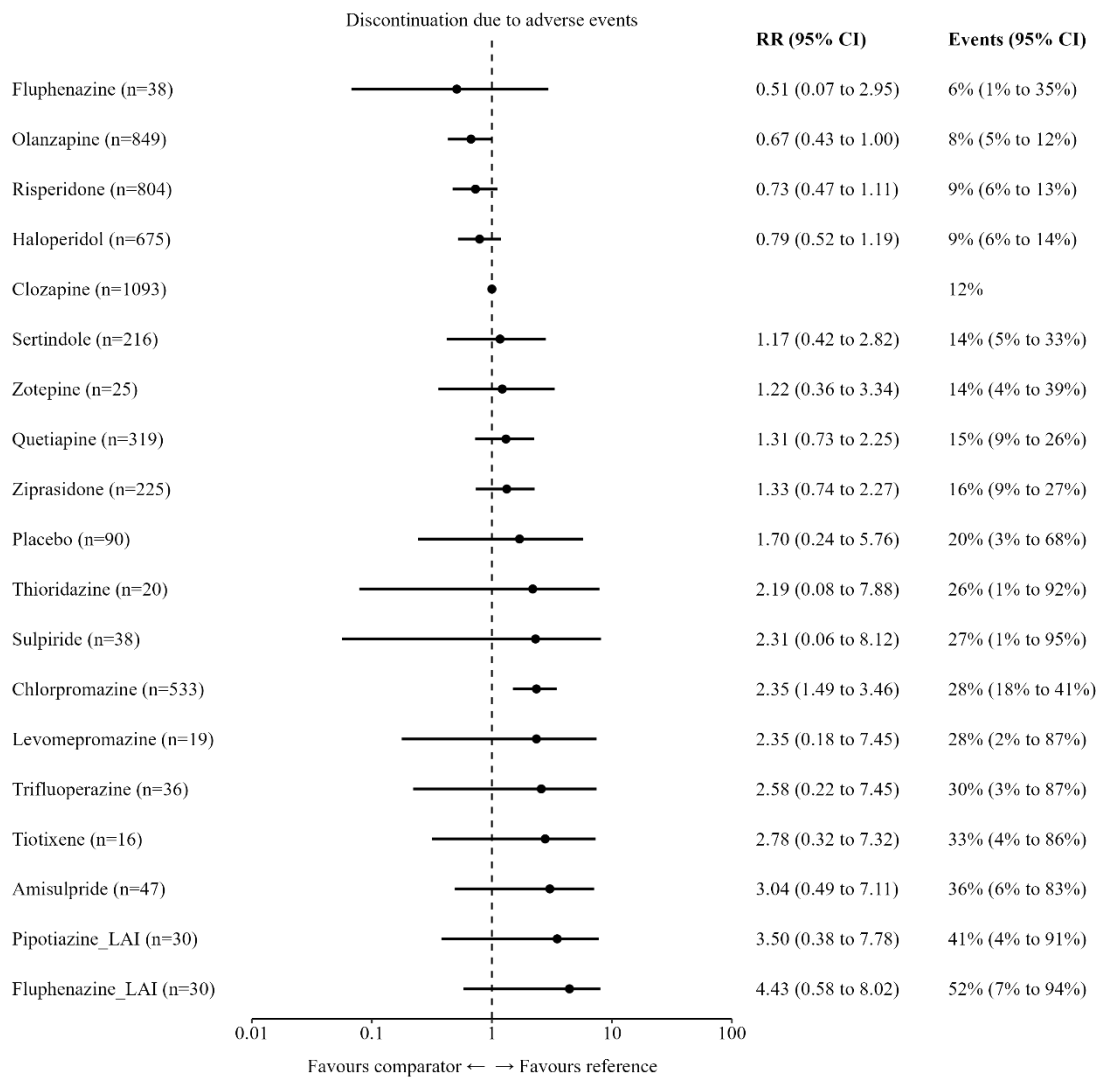

For this forest plot, we transformed the original OR to RR and exposure events rates (EER, called “events” in the forest plot) using the formula indicated above. Therefore, we used an average discontinuation rate (due to adverse events) with clozapine of 12% as the control event rate (CER).

Effect sizes are from the network meta-analysis. Order of treatments is according to the mean effect size. Reference is clozapine. The direction of the effect is indicated below the x-axis.

**League table for the outcome: Discontinuation due to adverse events (OR)**

|                      |                            |                            |                            |                            |                      |                      |                            |                      |                      |                       |                       |                            |                      |                      |                      |                      |                     |                     |
|----------------------|----------------------------|----------------------------|----------------------------|----------------------------|----------------------|----------------------|----------------------------|----------------------|----------------------|-----------------------|-----------------------|----------------------------|----------------------|----------------------|----------------------|----------------------|---------------------|---------------------|
| Fluphenazine         | NA                         | 1.00 (0.02 to 54.16)       | 1.00 (0.06 to 16.93)       | NA                         | NA                   | NA                   | 0.16 (0.01 to 3.60)        | NA                   | NA                   | NA                    | NA                    | NA                         | NA                   | NA                   | NA                   | NA                   | NA                  | NA                  |
| 0.75 (0.09 to 6.49)  | Olanzapine                 | 1.04 (0.52 to 2.10)        | 0.72 (0.11 to 4.67)        | <b>0.57 (0.32 to 0.99)</b> | NA                   | NA                   | 0.55 (0.10 to 3.12)        | NA                   | NA                   | NA                    | NA                    | 0.15 (0.02 to 1.27)        | NA                   | NA                   | NA                   | 0.15 (0.02 to 1.32)  | NA                  | NA                  |
| 0.68 (0.08 to 5.85)  | 0.90 (0.53 to 1.53)        | Risperidone                | 2.46 (0.41 to 14.74)       | 0.70 (0.39 to 1.26)        | 0.59 (0.21 to 1.63)  | NA                   | 0.13 (0.01 to 1.15)        | NA                   | NA                   | NA                    | NA                    | 2.59 (0.10 to 69.34)       | NA                   | NA                   | NA                   | NA                   | NA                  | NA                  |
| 0.62 (0.08 to 5.06)  | 0.82 (0.45 to 1.52)        | 0.91 (0.49 to 1.71)        | Haloperidol                | 0.84 (0.50 to 1.42)        | NA                   | NA                   | 0.39 (0.13 to 1.14)        | NA                   | 0.45 (0.03 to 5.73)  | NA                    | NA                    | 0.51 (0.04 to 6.50)        | NA                   | NA                   | 0.17 (0.01 to 3.73)  | NA                   | NA                  | NA                  |
| 0.48 (0.06 to 3.99)  | 0.64 (0.40 to 1.00)        | 0.70 (0.44 to 1.13)        | 0.77 (0.49 to 1.22)        | Clozapine                  | NA                   | 0.79 (0.21 to 3.03)  | 0.44 (0.10 to 1.94)        | 0.91 (0.41 to 2.00)  | NA                   | NA                    | NA                    | <b>0.35 (0.14 to 0.85)</b> | NA                   | NA                   | NA                   | NA                   | NA                  | NA                  |
| 0.40 (0.04 to 4.32)  | 0.53 (0.17 to 1.67)        | 0.59 (0.21 to 1.63)        | 0.64 (0.19 to 2.14)        | 0.83 (0.27 to 2.57)        | Sertindole           | NA                   | NA                         | NA                   | NA                   | NA                    | NA                    | NA                         | NA                   | NA                   | NA                   | NA                   | NA                  | NA                  |
| 0.38 (0.03 to 4.66)  | 0.50 (0.12 to 2.08)        | 0.56 (0.13 to 2.31)        | 0.61 (0.15 to 2.53)        | 0.79 (0.21 to 3.03)        | 0.95 (0.16 to 5.51)  | Zotepine             | NA                         | NA                   | NA                   | NA                    | NA                    | NA                         | NA                   | NA                   | NA                   | NA                   | NA                  | NA                  |
| 0.35 (0.04 to 2.91)  | 0.46 (0.21 to 1.00)        | 0.51 (0.23 to 1.12)        | 0.56 (0.28 to 1.13)        | 0.73 (0.37 to 1.43)        | 0.88 (0.24 to 3.18)  | 0.92 (0.20 to 4.13)  | Quetiapine                 | NA                   | NA                   | NA                    | NA                    | <b>0.30 (0.12 to 0.72)</b> | NA                   | NA                   | NA                   | NA                   | NA                  | NA                  |
| 0.34 (0.04 to 3.13)  | 0.46 (0.21 to 1.01)        | 0.51 (0.22 to 1.14)        | 0.55 (0.25 to 1.22)        | 0.72 (0.37 to 1.40)        | 0.86 (0.23 to 3.19)  | 0.91 (0.20 to 4.07)  | 0.99 (0.41 to 2.40)        | Ziprasidone          | NA                   | NA                    | NA                    | 0.75 (0.25 to 2.22)        | NA                   | NA                   | NA                   | NA                   | NA                  | NA                  |
| 0.25 (0.01 to 4.90)  | 0.34 (0.04 to 2.94)        | 0.37 (0.04 to 3.27)        | 0.41 (0.05 to 3.36)        | 0.53 (0.06 to 4.45)        | 0.64 (0.06 to 7.03)  | 0.67 (0.05 to 8.30)  | 0.73 (0.08 to 6.44)        | 0.74 (0.08 to 6.73)  | Placebo              | 1.00 (0.02 to 52.85)  | NA                    | 1.00 (0.02 to 52.85)       | NA                   | 0.59 (0.06 to 5.97)  | 0.56 (0.07 to 4.80)  | NA                   | 0.36 (0.07 to 1.93) | 0.23 (0.04 to 1.21) |
| 0.18 (0.00 to 11.39) | 0.24 (0.01 to 8.90)        | 0.27 (0.01 to 9.89)        | 0.30 (0.01 to 10.56)       | 0.38 (0.01 to 13.70)       | 0.46 (0.01 to 19.49) | 0.49 (0.01 to 22.08) | 0.53 (0.01 to 19.30)       | 0.54 (0.01 to 19.88) | 0.72 (0.02 to 22.27) | Thioridazine          | NA                    | 1.00 (0.02 to 52.85)       | NA                   | 1.00 (0.02 to 52.85) | NA                   | NA                   | NA                  | NA                  |
| 0.17 (0.00 to 15.35) | 0.23 (0.00 to 12.52)       | 0.25 (0.00 to 13.91)       | 0.28 (0.01 to 15.15)       | 0.36 (0.01 to 19.33)       | 0.43 (0.01 to 27.04) | 0.45 (0.01 to 30.42) | 0.49 (0.01 to 26.96)       | 0.50 (0.01 to 27.65) | 0.67 (0.01 to 59.71) | 0.93 (0.00 to 189.06) | Sulpiride             | 0.97 (0.02 to 50.37)       | NA                   | NA                   | NA                   | NA                   | NA                  | NA                  |
| 0.17 (0.02 to 1.44)  | <b>0.22 (0.11 to 0.45)</b> | <b>0.25 (0.12 to 0.51)</b> | <b>0.27 (0.14 to 0.53)</b> | <b>0.35 (0.19 to 0.63)</b> | 0.42 (0.12 to 1.47)  | 0.44 (0.10 to 1.91)  | <b>0.48 (0.24 to 0.95)</b> | 0.49 (0.23 to 1.02)  | 0.65 (0.08 to 5.54)  | 0.91 (0.03 to 31.85)  | 0.97 (0.02 to 50.37)  | Chlorpromazine             | 1.00 (0.06 to 17.25) | 1.00 (0.02 to 52.85) | NA                   | NA                   | NA                  | NA                  |
| 0.17 (0.00 to 5.94)  | 0.22 (0.01 to 4.16)        | 0.25 (0.01 to 4.63)        | 0.27 (0.01 to 5.03)        | 0.35 (0.02 to 6.38)        | 0.42 (0.02 to 9.42)  | 0.44 (0.02 to 10.83) | 0.48 (0.03 to 8.95)        | 0.49 (0.03 to 9.22)  | 0.65 (0.02 to 23.02) | 0.91 (0.01 to 86.50)  | 0.97 (0.01 to 126.43) | 1.00 (0.06 to 17.25)       | Levomopromazine      | NA                   | NA                   | NA                   | NA                  | NA                  |
| 0.15 (0.00 to 4.65)  | 0.19 (0.01 to 3.22)        | 0.22 (0.01 to 3.58)        | 0.24 (0.01 to 3.76)        | 0.31 (0.02 to 4.92)        | 0.37 (0.02 to 7.32)  | 0.39 (0.02 to 8.45)  | 0.42 (0.03 to 7.01)        | 0.43 (0.03 to 7.26)  | 0.57 (0.06 to 5.34)  | 0.80 (0.02 to 28.48)  | 0.85 (0.01 to 106.19) | 0.88 (0.05 to 14.04)       | 0.88 (0.02 to 46.70) | Trifluoperazine      | NA                   | NA                   | NA                  | NA                  |
| 0.13 (0.01 to 3.41)  | 0.17 (0.01 to 2.26)        | 0.19 (0.01 to 2.51)        | 0.21 (0.02 to 2.59)        | 0.27 (0.02 to 3.44)        | 0.33 (0.02 to 5.22)  | 0.35 (0.02 to 6.07)  | 0.38 (0.03 to 4.95)        | 0.38 (0.03 to 5.15)  | 0.51 (0.07 to 3.97)  | 0.71 (0.01 to 34.47)  | 0.77 (0.01 to 84.07)  | 0.79 (0.06 to 10.08)       | 0.79 (0.02 to 35.97) | 0.90 (0.05 to 17.11) | Tiotixene            | NA                   | NA                  | NA                  |
| 0.11 (0.01 to 2.41)  | 0.15 (0.02 to 1.32)        | 0.17 (0.02 to 1.55)        | 0.18 (0.02 to 1.74)        | 0.24 (0.03 to 2.17)        | 0.29 (0.02 to 3.32)  | 0.30 (0.02 to 3.99)  | 0.33 (0.03 to 3.25)        | 0.33 (0.03 to 3.33)  | 0.45 (0.02 to 9.52)  | 0.62 (0.01 to 41.19)  | 0.67 (0.01 to 63.32)  | 0.69 (0.07 to 6.64)        | 0.69 (0.02 to 26.16) | 0.78 (0.02 to 26.94) | 0.87 (0.03 to 24.86) | Amisulpride          | NA                  | NA                  |
| 0.09 (0.00 to 2.74)  | 0.12 (0.01 to 1.88)        | 0.13 (0.01 to 2.09)        | 0.15 (0.01 to 2.17)        | 0.19 (0.01 to 2.87)        | 0.23 (0.01 to 4.29)  | 0.24 (0.01 to 4.96)  | 0.26 (0.02 to 4.11)        | 0.27 (0.02 to 4.26)  | 0.36 (0.07 to 1.93)  | 0.50 (0.01 to 22.66)  | 0.53 (0.00 to 64.34)  | 0.55 (0.04 to 8.31)        | 0.55 (0.01 to 28.11) | 0.63 (0.04 to 10.21) | 0.70 (0.05 to 9.84)  | 0.80 (0.02 to 26.14) | Pipotiazine_LAI     | 0.64 (0.22 to 1.87) |
| 0.06 (0.00 to 1.74)  | 0.08 (0.01 to 1.19)        | 0.09 (0.01 to 1.32)        | 0.09 (0.01 to 1.38)        | 0.12 (0.01 to 1.82)        | 0.15 (0.01 to 2.72)  | 0.16 (0.01 to 3.15)  | 0.17 (0.01 to 2.60)        | 0.17 (0.01 to 2.70)  | 0.23 (0.04 to 1.21)  | 0.32 (0.01 to 14.42)  | 0.34 (0.00 to 41.04)  | 0.35 (0.02 to 5.27)        | 0.35 (0.01 to 17.90) | 0.40 (0.02 to 6.47)  | 0.45 (0.03 to 6.23)  | 0.51 (0.02 to 16.62) | 0.64 (0.22 to 1.87) | Fluphenazine_LAI    |

Treatments are presented in order of efficacy ranking. Results of the network meta-analysis are reported in the left lower half and results of pairwise meta-analyses in the right upper half. Each cell provides the effect estimate and the corresponding 95% credible interval (95% CI) of a comparison (left lower half: treatment in column versus treatment in row; right upper half: treatment in row versus treatment in column). The type of effect size measure is odd ratio (OR). Bold results indicate 95% CI excluding no effect. NA=not available.

### League table for the outcome: Discontinuation due to adverse events (RR)

|                     |                            |                            |                            |                            |                     |                     |                            |                     |                     |                     |                     |                            |                     |                     |                     |                     |                    |                     |    |
|---------------------|----------------------------|----------------------------|----------------------------|----------------------------|---------------------|---------------------|----------------------------|---------------------|---------------------|---------------------|---------------------|----------------------------|---------------------|---------------------|---------------------|---------------------|--------------------|---------------------|----|
| Fluphenazine        | NA                         | 1 (0.02 to 22.16)          | 1 (0.06 to 11.48)          | NA                         | NA                  | NA                  | 0.17 (0.01 to 3.17)        | NA                  | NA                  | NA                  | NA                  | NA                         | NA                  | NA                  | NA                  | NA                  | NA                 | NA                  | NA |
| 0.75 (0.09 to 5.72) | Olanzapine                 | 1.04 (0.53 to 2.04)        | 0.73 (0.11 to 4.21)        | <b>0.58 (0.33 to 0.99)</b> | NA                  | NA                  | 0.56 (0.1 to 2.81)         | NA                  | NA                  | NA                  | NA                  | 0.16 (0.02 to 1.24)        | NA                  | NA                  | NA                  | 0.17 (0.02 to 1.26) | NA                 | NA                  | NA |
| 0.69 (0.08 to 5.17) | 0.9 (0.54 to 1.51)         | Risperidone                | 2.36 (0.42 to 10.46)       | 0.71 (0.4 to 1.25)         | 0.6 (0.22 to 1.58)  | NA                  | 0.14 (0.01 to 1.14)        | NA                  | NA                  | NA                  | NA                  | 2.23 (0.11 to 8.69)        | NA                  | NA                  | NA                  | NA                  | NA                 | NA                  | NA |
| 0.63 (0.08 to 4.51) | 0.82 (0.46 to 1.5)         | 0.91 (0.5 to 1.67)         | Haloperidol                | 0.85 (0.51 to 1.4)         | NA                  | NA                  | 0.4 (0.14 to 1.13)         | NA                  | 0.47 (0.03 to 4.31) | NA                  | NA                  | 0.54 (0.04 to 4.16)        | NA                  | NA                  | 0.19 (0.01 to 2.77) | NA                  | NA                 | NA                  | NA |
| 0.49 (0.06 to 3.58) | 0.65 (0.41 to 1)           | 0.71 (0.45 to 1.12)        | 0.78 (0.5 to 1.21)         | Clozapine                  | NA                  | 0.8 (0.22 to 2.76)  | 0.45 (0.1 to 1.85)         | 0.91 (0.42 to 1.9)  | NA                  | NA                  | NA                  | <b>0.37 (0.15 to 0.86)</b> | NA                  | NA                  | NA                  | NA                  | NA                 | NA                  | NA |
| 0.41 (0.04 to 3.75) | 0.54 (0.18 to 1.62)        | 0.6 (0.22 to 1.58)         | 0.65 (0.2 to 2.03)         | 0.84 (0.28 to 2.4)         | Sertindole          | NA                  | NA                         | NA                  | NA                  | NA                  | NA                  | NA                         | NA                  | NA                  | NA                  | NA                  | NA                 | NA                  | NA |
| 0.39 (0.03 to 3.96) | 0.51 (0.13 to 1.98)        | 0.57 (0.14 to 2.17)        | 0.62 (0.16 to 2.36)        | 0.8 (0.22 to 2.76)         | 0.95 (0.17 to 4.53) | Zotepine            | NA                         | NA                  | NA                  | NA                  | NA                  | NA                         | NA                  | NA                  | NA                  | NA                  | NA                 | NA                  | NA |
| 0.36 (0.04 to 2.65) | 0.47 (0.22 to 1)           | 0.52 (0.24 to 1.11)        | 0.57 (0.29 to 1.12)        | 0.74 (0.38 to 1.4)         | 0.89 (0.25 to 2.86) | 0.92 (0.21 to 3.55) | Quetiapine                 | NA                  | NA                  | NA                  | NA                  | <b>0.32 (0.13 to 0.74)</b> | NA                  | NA                  | NA                  | NA                  | NA                 | NA                  | NA |
| 0.35 (0.04 to 2.81) | 0.47 (0.22 to 1)           | 0.52 (0.23 to 1.13)        | 0.56 (0.26 to 1.21)        | 0.73 (0.38 to 1.37)        | 0.87 (0.24 to 2.86) | 0.91 (0.21 to 3.5)  | 0.99 (0.42 to 2.23)        | Ziprasidone         | NA                  | NA                  | NA                  | 0.77 (0.27 to 1.97)        | NA                  | NA                  | NA                  | NA                  | NA                 | NA                  | NA |
| 0.26 (0.01 to 3.85) | 0.36 (0.04 to 2.59)        | 0.39 (0.04 to 2.82)        | 0.43 (0.05 to 2.89)        | 0.55 (0.06 to 3.59)        | 0.66 (0.06 to 4.95) | 0.69 (0.05 to 5.5)  | 0.74 (0.09 to 4.67)        | 0.75 (0.09 to 4.81) | Placebo             | 1 (0.02 to 9.09)    | NA                  | 1 (0.02 to 8.4)            | NA                  | 0.62 (0.07 to 3.82) | 0.59 (0.08 to 3.23) | NA                  | 0.4 (0.08 to 1.67) | 0.29 (0.05 to 1.15) |    |
| 0.19 (0 to 5.8)     | 0.26 (0.01 to 5.14)        | 0.29 (0.01 to 5.42)        | 0.32 (0.01 to 5.6)         | 0.4 (0.01 to 6.29)         | 0.48 (0.01 to 7.18) | 0.51 (0.01 to 7.47) | 0.55 (0.01 to 7.15)        | 0.56 (0.01 to 7.22) | 0.74 (0.02 to 7.49) | Thioridazine        | NA                  | 1 (0.02 to 8.4)            | NA                  | 1 (0.02 to 7.68)    | NA                  | NA                  | NA                 | NA                  | NA |
| 0.19 (0 to 6.35)    | 0.25 (0 to 5.86)           | 0.27 (0 to 6.11)           | 0.3 (0.01 to 6.32)         | 0.38 (0.01 to 6.88)        | 0.46 (0.01 to 7.57) | 0.48 (0.01 to 7.79) | 0.52 (0.01 to 7.56)        | 0.53 (0.01 to 7.61) | 0.69 (0.01 to 8.78) | 0.94 (0 to 9.66)    | Sulpiride           | 0.97 (0.02 to 8.34)        | NA                  | NA                  | NA                  | NA                  | NA                 | NA                  | NA |
| 0.19 (0.02 to 1.38) | <b>0.24 (0.12 to 0.48)</b> | <b>0.27 (0.13 to 0.54)</b> | <b>0.29 (0.15 to 0.56)</b> | <b>0.37 (0.21 to 0.65)</b> | 0.45 (0.13 to 1.4)  | 0.47 (0.11 to 1.75) | <b>0.51 (0.26 to 0.95)</b> | 0.52 (0.25 to 1.02) | 0.67 (0.09 to 3.79) | 0.92 (0.03 to 7.68) | 0.97 (0.02 to 8.34) | Chlorpromazine             | 1 (0.07 to 6.49)    | 1 (0.02 to 7.68)    | NA                  | NA                  | NA                 | NA                  | NA |
| 0.19 (0 to 3.95)    | 0.24 (0.01 to 3.15)        | 0.27 (0.01 to 3.38)        | 0.29 (0.01 to 3.56)        | 0.37 (0.02 to 4.12)        | 0.45 (0.02 to 5.07) | 0.47 (0.02 to 5.41) | 0.51 (0.03 to 4.94)        | 0.52 (0.03 to 5.01) | 0.67 (0.02 to 7.09) | 0.92 (0.01 to 8.89) | 0.97 (0.01 to 9.16) | 1 (0.07 to 6.49)           | Levomepromazine     | NA                  | NA                  | NA                  | NA                 | NA                  | NA |
| 0.17 (0 to 3.29)    | 0.21 (0.01 to 2.57)        | 0.24 (0.01 to 2.77)        | 0.26 (0.01 to 2.86)        | 0.34 (0.02 to 3.41)        | 0.4 (0.02 to 4.26)  | 0.42 (0.02 to 4.58) | 0.45 (0.03 to 4.17)        | 0.46 (0.03 to 4.25) | 0.6 (0.07 to 3.58)  | 0.82 (0.02 to 6.92) | 0.86 (0.01 to 8.22) | 0.89 (0.06 to 5.66)        | 0.89 (0.02 to 7.55) | Trifluoperazine     | NA                  | NA                  | NA                 | NA                  | NA |
| 0.15 (0.01 to 2.61) | 0.19 (0.01 to 1.95)        | 0.21 (0.01 to 2.1)         | 0.23 (0.02 to 2.15)        | 0.3 (0.02 to 2.62)         | 0.36 (0.02 to 3.39) | 0.38 (0.02 to 3.69) | 0.41 (0.03 to 3.29)        | 0.41 (0.03 to 3.37) | 0.54 (0.08 to 2.88) | 0.74 (0.01 to 6.54) | 0.79 (0.01 to 7.25) | 0.81 (0.07 to 4.67)        | 0.81 (0.02 to 6.59) | 0.91 (0.06 to 5.6)  | Tiotixene           | NA                  | NA                 | NA                  | NA |
| 0.13 (0.01 to 2)    | 0.17 (0.02 to 1.26)        | 0.19 (0.02 to 1.44)        | 0.2 (0.02 to 1.57)         | 0.27 (0.03 to 1.85)        | 0.32 (0.02 to 2.48) | 0.33 (0.02 to 2.78) | 0.37 (0.03 to 2.45)        | 0.37 (0.03 to 2.49) | 0.49 (0.02 to 4.25) | 0.66 (0.01 to 6.01) | 0.7 (0.01 to 6.28)  | 0.72 (0.08 to 3.65)        | 0.72 (0.02 to 5.61) | 0.81 (0.02 to 5.64) | 0.89 (0.03 to 5.55) | Amisulpride         | NA                 | NA                  | NA |
| 0.11 (0 to 2.11)    | 0.14 (0.01 to 1.64)        | 0.15 (0.01 to 1.76)        | 0.18 (0.01 to 1.81)        | 0.22 (0.01 to 2.18)        | 0.26 (0.01 to 2.75) | 0.28 (0.01 to 2.97) | 0.3 (0.02 to 2.69)         | 0.31 (0.02 to 2.74) | 0.4 (0.08 to 1.67)  | 0.55 (0.01 to 4.84) | 0.58 (0 to 5.47)    | 0.6 (0.05 to 3.71)         | 0.6 (0.01 to 5.02)  | 0.67 (0.05 to 3.98) | 0.74 (0.06 to 3.93) | 0.83 (0.02 to 4.96) | Pipotiazine_LAI    | 0.7 (0.27 to 1.53)  |    |
| 0.08 (0 to 1.46)    | 0.1 (0.01 to 1.14)         | 0.12 (0.01 to 1.22)        | 0.12 (0.01 to 1.26)        | 0.15 (0.01 to 1.51)        | 0.19 (0.01 to 1.89) | 0.2 (0.01 to 2.04)  | 0.22 (0.01 to 1.85)        | 0.22 (0.01 to 1.89) | 0.29 (0.05 to 1.15) | 0.39 (0.01 to 3.27) | 0.41 (0 to 3.67)    | 0.42 (0.03 to 2.53)        | 0.42 (0.01 to 3.38) | 0.47 (0.03 to 2.71) | 0.52 (0.04 to 2.67) | 0.58 (0.03 to 3.34) | 0.7 (0.27 to 1.53) | Fluphenazine_LAI    |    |

The original results given in OR (and their 95% CI) are transformed to RR (left lower half: treatment in column versus treatment in row; right upper half: treatment in row versus treatment in column) using the formula described above. For this transformation, we assumed a discontinuation rate (due to adverse events) with clozapine of 12% as the control event rate (CER) for all comparisons of active antipsychotic versus clozapine.

Treatments are presented in order of efficacy ranking. Results of the network meta-analysis are reported in the left lower half and results of pairwise meta-analyses in the right upper half. Bold results indicate 95% CI excluding no effect. NA=not available.

## Forest plot of results of pairwise meta-analyses

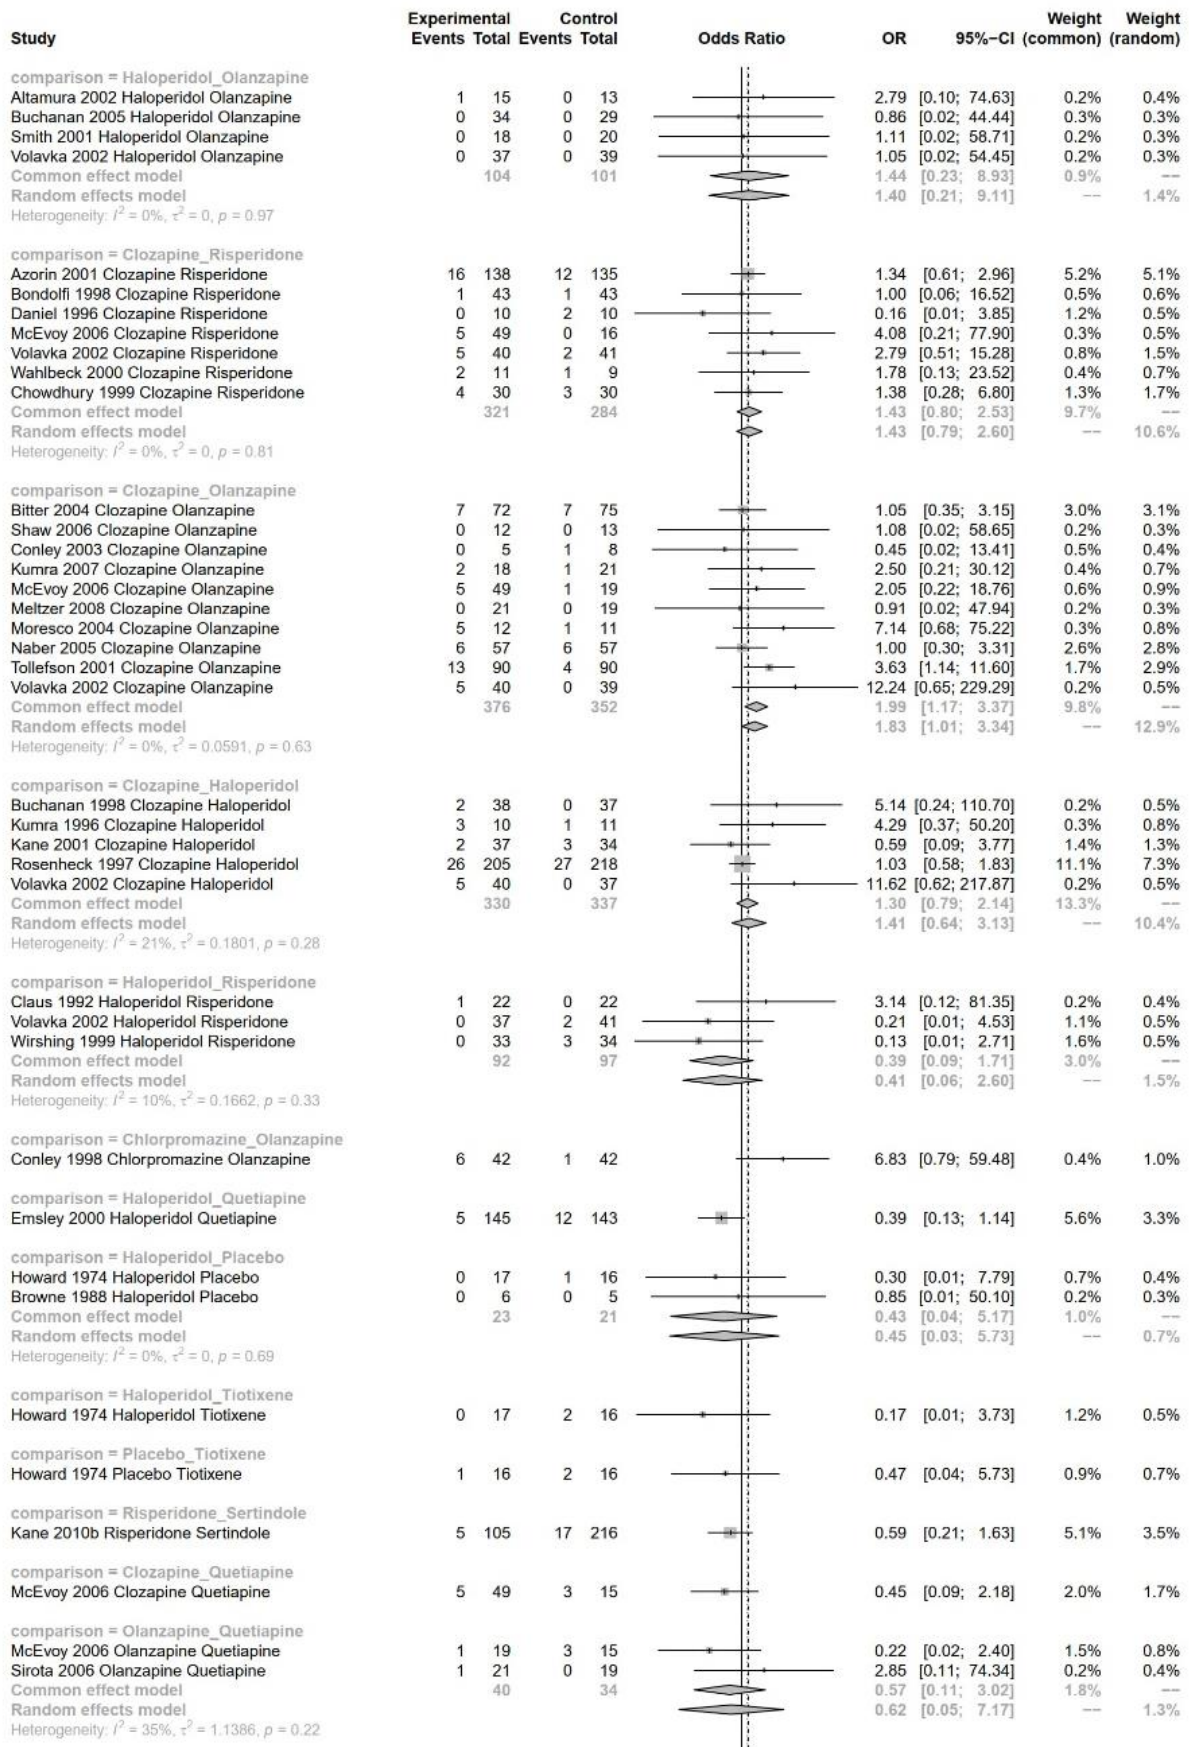

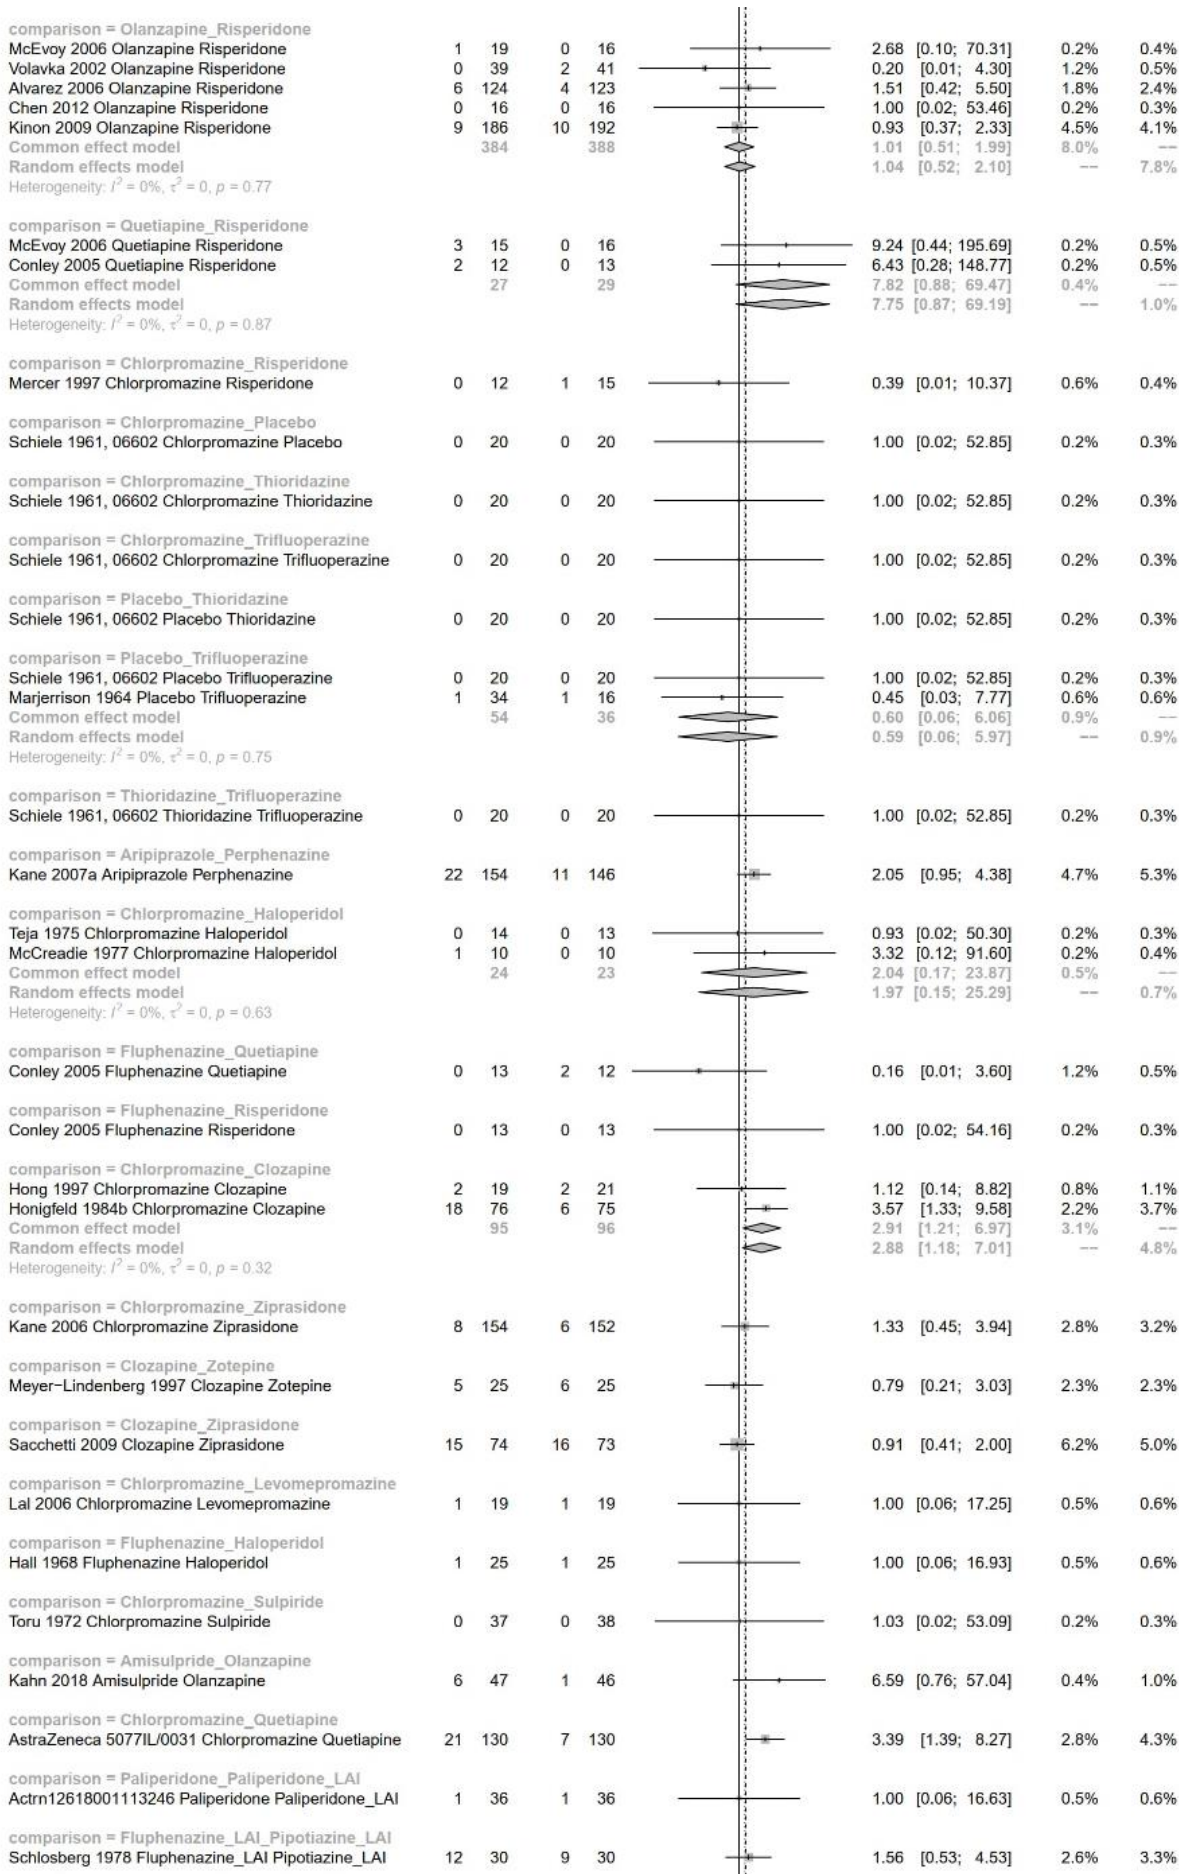

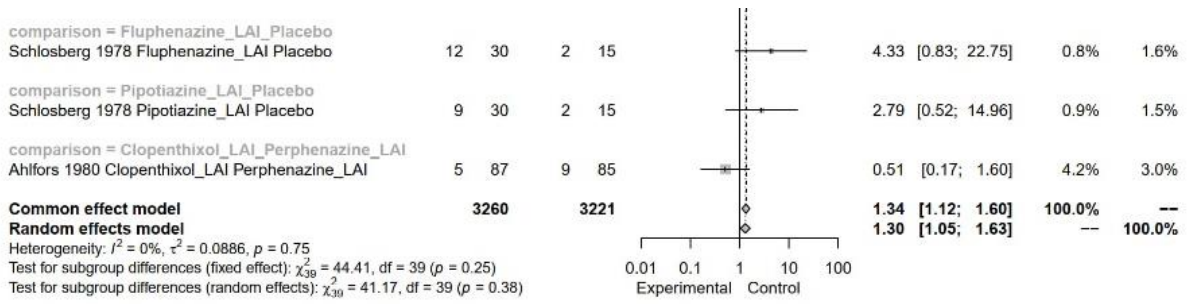

A summary effect size is calculated by pairwise meta-analyses of all studies of a specific comparison. The type of effect size measure is OR.

### 8.7 Use of antiparkinsonian medication

We transformed the original ORs to RRs and EERs vs. CER assuming the baseline risk of using antiparkinsonian medication with clozapine of 24% (namely CER). 24% was the average risk of using antiparkinsonian medication with clozapine across all clozapine-arms in the network meta-analysis, as estimated by a single-arm meta-analysis of proportions.

#### Network plot

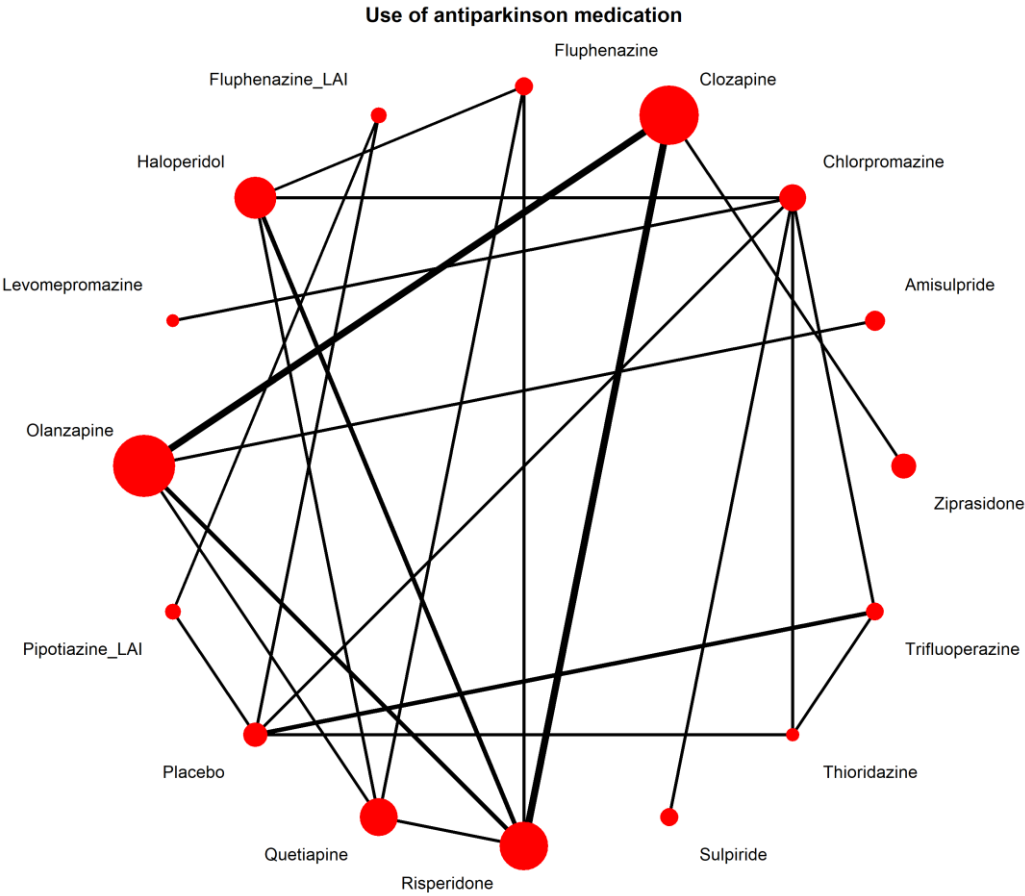

*Lines link treatments with direct comparisons in trials; thickness of lines corresponds to the number of trials evaluating the comparison; size of the nodes corresponds to the number of participants assigned to the treatment.*



### Forest-plot of results of network meta-analysis for antipsychotic drugs versus clozapine

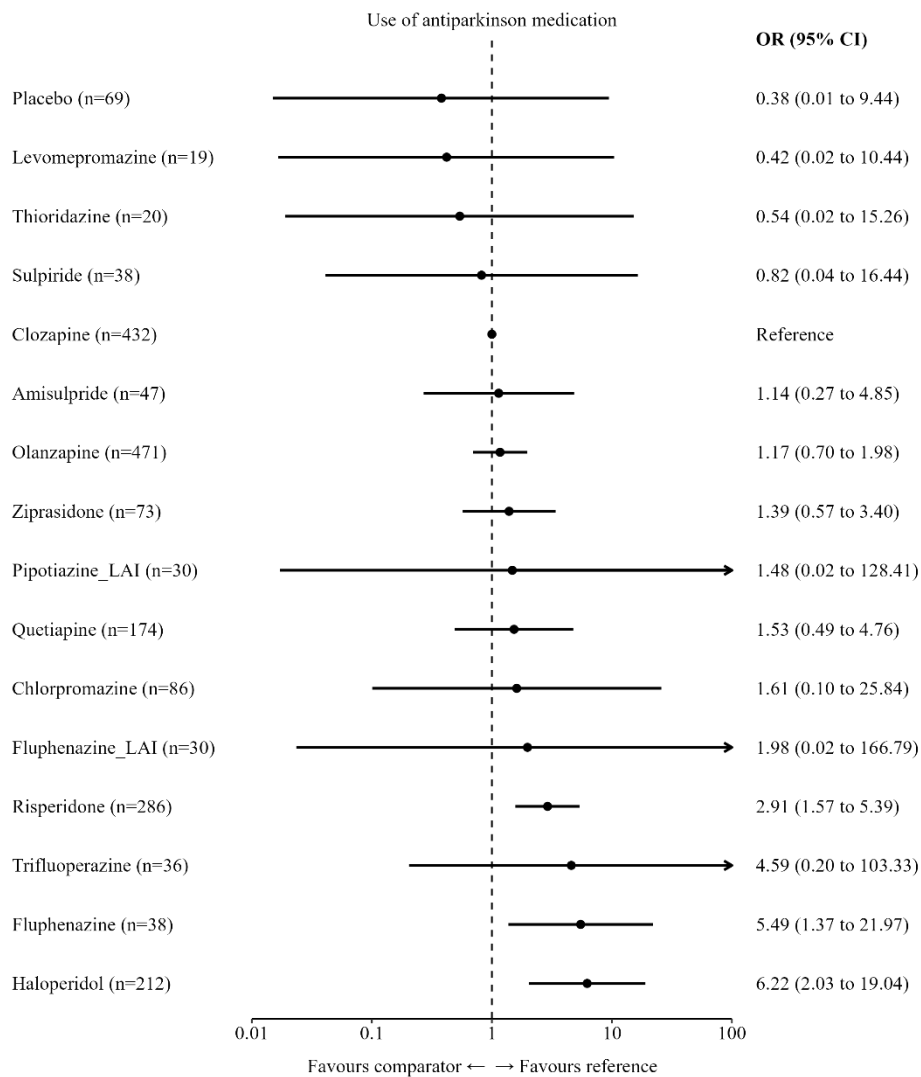

Effect sizes, measured as odds ratio (OR), are from the network meta-analysis. Order of treatments is according to the mean effect size. Reference is clozapine. The direction of the effect is indicated below the x-axis.

**Forest plot with RR and EER versus CER**

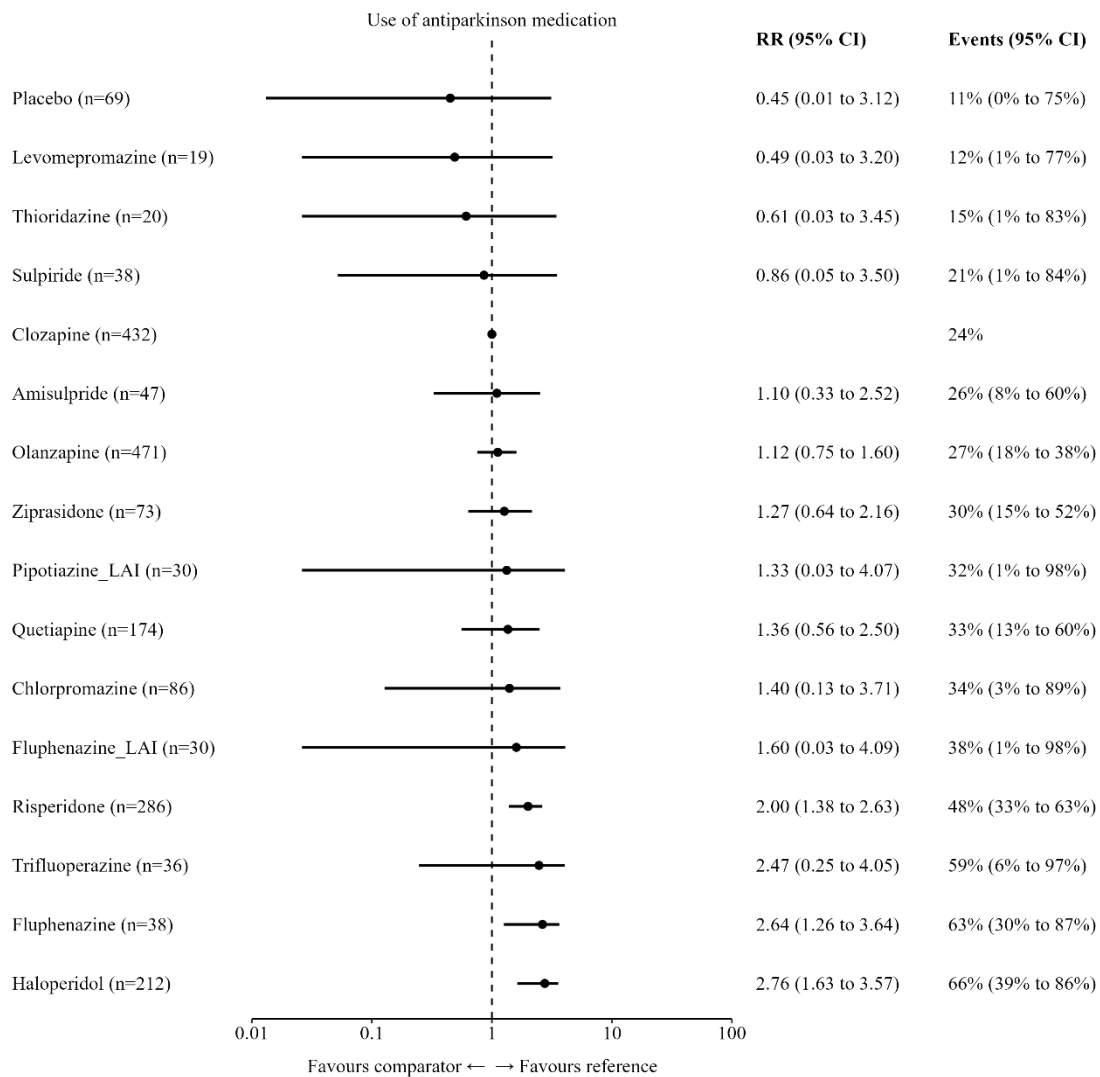

For this forest plot, we transformed the original OR to RR and exposure events rates (EER, called “events” in the forest plot) using the formula indicated above. Therefore, we used an average rate of using antiparkinsonian medication with clozapine of 24% as the control event rate (CER).

Effect sizes are from the network meta-analysis. Order of treatments is according to the mean effect size. Reference is clozapine. The direction of the effect is indicated below the x-axis.

**League table for the outcome: Use of antiparkinsonian medication (OR)**

|                            |                            |                            |                      |                            |                      |                            |                            |                      |                            |                      |                      |                      |                            |                            |                            |    |
|----------------------------|----------------------------|----------------------------|----------------------|----------------------------|----------------------|----------------------------|----------------------------|----------------------|----------------------------|----------------------|----------------------|----------------------|----------------------------|----------------------------|----------------------------|----|
| Placebo                    | NA                         | 1.00 (0.12 to 8.56)        | NA                   | NA                         | NA                   | NA                         | NA                         | NA                   | 0.25 (0.01 to 5.54)        | NA                   | 0.33 (0.05 to 2.17)  | 0.19 (0.01 to 3.99)  | NA                         | <b>0.08 (0.02 to 0.30)</b> | NA                         | NA |
| 0.90 (0.09 to 9.21)        | Levomopromazine            | NA                         | NA                   | NA                         | NA                   | NA                         | NA                         | NA                   | NA                         | NA                   | 0.26 (0.05 to 1.33)  | NA                   | NA                         | NA                         | NA                         | NA |
| 0.70 (0.10 to 4.92)        | 0.77 (0.06 to 9.32)        | Thioridazine               | NA                   | NA                         | NA                   | NA                         | NA                         | NA                   | NA                         | NA                   | 0.33 (0.05 to 2.17)  | NA                   | NA                         | <b>0.14 (0.02 to 0.82)</b> | NA                         | NA |
| 0.46 (0.06 to 3.37)        | 0.51 (0.07 to 3.72)        | 0.65 (0.07 to 5.84)        | Sulpiride            | NA                         | NA                   | NA                         | NA                         | NA                   | NA                         | NA                   | 0.51 (0.16 to 1.58)  | NA                   | NA                         | NA                         | NA                         | NA |
| 0.38 (0.01 to 9.44)        | 0.42 (0.02 to 10.44)       | 0.54 (0.02 to 15.26)       | 0.82 (0.04 to 16.44) | Clozapine                  | NA                   | 1.02 (0.57 to 1.81)        | 0.72 (0.29 to 1.75)        | NA                   | NA                         | NA                   | NA                   | NA                   | <b>0.24 (0.11 to 0.55)</b> | NA                         | NA                         | NA |
| 0.33 (0.01 to 10.64)       | 0.36 (0.01 to 11.76)       | 0.47 (0.01 to 17.05)       | 0.72 (0.03 to 18.86) | 0.87 (0.21 to 3.71)        | Amisulpride          | 0.98 (0.25 to 3.75)        | NA                         | NA                   | NA                         | NA                   | NA                   | NA                   | NA                         | NA                         | NA                         | NA |
| 0.32 (0.01 to 7.91)        | 0.35 (0.01 to 8.75)        | 0.46 (0.02 to 12.80)       | 0.70 (0.04 to 13.76) | 0.85 (0.51 to 1.44)        | 0.98 (0.25 to 3.75)  | Olanzapine                 | NA                         | NA                   | NA                         | 1.12 (0.25 to 5.07)  | NA                   | NA                   | <b>0.46 (0.24 to 0.92)</b> | NA                         | NA                         | NA |
| 0.27 (0.01 to 7.66)        | 0.30 (0.01 to 8.47)        | 0.39 (0.01 to 12.33)       | 0.59 (0.03 to 13.45) | 0.72 (0.29 to 1.75)        | 0.82 (0.15 to 4.49)  | 0.84 (0.30 to 2.37)        | Ziprasidone                | NA                   | NA                         | NA                   | NA                   | NA                   | NA                         | NA                         | NA                         | NA |
| 0.25 (0.01 to 5.54)        | 0.28 (0.01 to 13.32)       | 0.36 (0.01 to 13.95)       | 0.55 (0.01 to 21.82) | 0.67 (0.01 to 58.37)       | 0.77 (0.01 to 80.54) | 0.79 (0.01 to 67.65)       | 0.94 (0.01 to 88.77)       | Pipotiazine LAI      | NA                         | NA                   | 0.75 (0.15 to 3.73)  | NA                   | NA                         | NA                         | NA                         | NA |
| 0.25 (0.01 to 5.97)        | 0.27 (0.01 to 6.60)        | 0.35 (0.01 to 9.67)        | 0.54 (0.03 to 10.37) | 0.65 (0.21 to 2.04)        | 0.75 (0.13 to 4.17)  | 0.77 (0.26 to 2.23)        | 0.91 (0.21 to 3.87)        | 0.97 (0.01 to 82.01) | Quetiapine                 | NA                   | NA                   | 1.83 (0.23 to 14.65) | NA                         | 0.75 (0.12 to 4.79)        | <b>0.16 (0.04 to 0.64)</b> |    |
| 0.23 (0.05 to 1.20)        | 0.26 (0.05 to 1.33)        | 0.33 (0.05 to 2.17)        | 0.51 (0.16 to 1.58)  | 0.62 (0.04 to 9.92)        | 0.71 (0.03 to 15.20) | 0.73 (0.05 to 11.41)       | 0.86 (0.05 to 15.89)       | 0.92 (0.03 to 30.26) | 0.95 (0.06 to 14.58)       | Chlorpromazine       | NA                   | NA                   | 0.41 (0.09 to 1.76)        | NA                         | 0.26 (0.02 to 3.28)        |    |
| 0.19 (0.01 to 3.99)        | 0.21 (0.00 to 9.68)        | 0.27 (0.01 to 10.11)       | 0.42 (0.01 to 15.83) | 0.51 (0.01 to 42.59)       | 0.58 (0.01 to 58.83) | 0.59 (0.01 to 49.34)       | 0.70 (0.01 to 64.80)       | 0.75 (0.15 to 3.73)  | 0.77 (0.01 to 63.51)       | 0.82 (0.03 to 25.94) | Fluphenazine LAI     | NA                   | NA                         | NA                         | NA                         | NA |
| 0.13 (0.01 to 3.10)        | 0.14 (0.01 to 3.43)        | 0.19 (0.01 to 5.03)        | 0.28 (0.01 to 5.39)  | <b>0.34 (0.19 to 0.64)</b> | 0.39 (0.09 to 1.69)  | <b>0.40 (0.23 to 0.71)</b> | 0.48 (0.16 to 1.42)        | 0.51 (0.01 to 42.77) | 0.53 (0.18 to 1.50)        | 0.56 (0.04 to 8.43)  | 0.68 (0.01 to 55.54) | Risperidone          | NA                         | 0.41 (0.06 to 3.02)        | 0.50 (0.15 to 1.75)        |    |
| <b>0.08 (0.02 to 0.30)</b> | <b>0.09 (0.01 to 0.79)</b> | <b>0.12 (0.02 to 0.69)</b> | 0.18 (0.03 to 1.10)  | 0.22 (0.01 to 4.91)        | 0.25 (0.01 to 7.30)  | 0.26 (0.01 to 5.66)        | 0.30 (0.01 to 7.74)        | 0.32 (0.01 to 9.13)  | 0.33 (0.02 to 7.24)        | 0.35 (0.09 to 1.45)  | 0.43 (0.02 to 11.76) | 0.63 (0.03 to 13.60) | Trifluoperazine            | NA                         | NA                         |    |
| 0.07 (0.00 to 1.72)        | 0.08 (0.00 to 1.90)        | 0.10 (0.00 to 2.78)        | 0.15 (0.01 to 2.99)  | <b>0.18 (0.05 to 0.73)</b> | 0.21 (0.03 to 1.40)  | <b>0.21 (0.06 to 0.82)</b> | 0.25 (0.05 to 1.32)        | 0.27 (0.00 to 23.38) | <b>0.28 (0.08 to 0.99)</b> | 0.29 (0.02 to 4.70)  | 0.36 (0.00 to 30.37) | 0.53 (0.15 to 1.90)  | 0.84 (0.04 to 18.82)       | Fluphenazine               | 1.23 (0.30 to 4.97)        |    |
| 0.06 (0.00 to 1.24)        | 0.07 (0.00 to 1.37)        | 0.09 (0.00 to 2.02)        | 0.13 (0.01 to 2.13)  | <b>0.16 (0.05 to 0.49)</b> | 0.18 (0.03 to 1.03)  | <b>0.19 (0.06 to 0.55)</b> | <b>0.22 (0.05 to 0.94)</b> | 0.24 (0.00 to 17.89) | <b>0.25 (0.09 to 0.68)</b> | 0.26 (0.02 to 3.28)  | 0.32 (0.00 to 23.22) | 0.47 (0.18 to 1.24)  | 0.74 (0.04 to 13.49)       | 0.88 (0.29 to 2.70)        | Haloperidol                |    |

Treatments are presented in order of efficacy ranking. Results of the network meta-analysis are reported in the left lower half and results of pairwise meta-analyses in the right upper half. Each cell provides the effect estimate and the corresponding 95% credible interval (95% CI) of a comparison (left lower half: treatment in column versus treatment in row; right upper half: treatment in row versus treatment in column). The type of effect size measure is odd ratio (OR). Bold results indicate 95% CI excluding no effect. NA=not available.

**League table for the outcome: Use of antiparkinsonian medication (RR)**

|                            |                            |                            |                     |                            |                     |                            |                            |                     |                            |                     |                     |                     |                            |                            |                     |                            |
|----------------------------|----------------------------|----------------------------|---------------------|----------------------------|---------------------|----------------------------|----------------------------|---------------------|----------------------------|---------------------|---------------------|---------------------|----------------------------|----------------------------|---------------------|----------------------------|
| Placebo                    | NA                         | 1 (0.13 to 6.29)           | NA                  | NA                         | NA                  | NA                         | NA                         | NA                  | 0.27 (0.01 to 3.61)        | NA                  | 0.36 (0.06 to 1.89) | 0.22 (0.01 to 2.75) | NA                         | <b>0.11 (0.03 to 0.38)</b> | NA                  | NA                         |
| 0.9 (0.09 to 7.04)         | Levomopromazine            | NA                         | NA                  | NA                         | NA                  | NA                         | NA                         | NA                  | NA                         | NA                  | 0.29 (0.06 to 1.28) | NA                  | NA                         | NA                         | NA                  | NA                         |
| 0.71 (0.1 to 4.15)         | 0.78 (0.06 to 6.67)        | Thioridazine               | NA                  | NA                         | NA                  | NA                         | NA                         | NA                  | NA                         | NA                  | 0.36 (0.06 to 1.89) | NA                  | NA                         | <b>0.19 (0.03 to 0.87)</b> | NA                  | NA                         |
| 0.48 (0.06 to 2.91)        | 0.53 (0.07 to 3.14)        | 0.67 (0.07 to 4.4)         | Sulpiride           | NA                         | NA                  | NA                         | NA                         | NA                  | NA                         | NA                  | 0.54 (0.18 to 1.47) | NA                  | NA                         | NA                         | NA                  | NA                         |
| 0.4 (0.01 to 5.59)         | 0.44 (0.02 to 5.89)        | 0.56 (0.02 to 7.05)        | 0.83 (0.04 to 7.27) | Clozapine                  | NA                  | 1.02 (0.59 to 1.68)        | 0.74 (0.31 to 1.62)        | NA                  | NA                         | NA                  | NA                  | NA                  | <b>0.28 (0.13 to 0.61)</b> | NA                         | NA                  | NA                         |
| 0.35 (0.01 to 5.67)        | 0.38 (0.01 to 5.94)        | 0.49 (0.01 to 7.18)        | 0.74 (0.03 to 7.18) | 0.88 (0.23 to 2.98)        | Amisulpride         | 0.98 (0.27 to 2.97)        | NA                         | NA                  | NA                         | NA                  | NA                  | NA                  | NA                         | NA                         | NA                  | NA                         |
| 0.34 (0.01 to 4.76)        | 0.37 (0.01 to 5.03)        | 0.49 (0.02 to 6.02)        | 0.72 (0.04 to 6.2)  | 0.86 (0.54 to 1.38)        | 0.98 (0.27 to 2.97) | Olanzapine                 | NA                         | NA                  | NA                         | 1.1 (0.28 to 3.39)  | NA                  | NA                  | <b>0.52 (0.28 to 0.94)</b> | NA                         | NA                  | NA                         |
| 0.29 (0.01 to 4.44)        | 0.32 (0.01 to 4.67)        | 0.42 (0.01 to 5.52)        | 0.62 (0.03 to 5.71) | 0.74 (0.31 to 1.62)        | 0.84 (0.17 to 3.25) | 0.85 (0.32 to 2.06)        | Ziprasidone                | NA                  | NA                         | NA                  | NA                  | NA                  | NA                         | NA                         | NA                  | NA                         |
| 0.27 (0.01 to 3.61)        | 0.31 (0.01 to 5.43)        | 0.39 (0.01 to 6.32)        | 0.58 (0.01 to 6.32) | 0.7 (0.01 to 7.52)         | 0.79 (0.01 to 7.77) | 0.81 (0.01 to 7.64)        | 0.95 (0.01 to 7.83)        | Pipotiazine LAI     | NA                         | NA                  | NA                  | 0.78 (0.17 to 2.64) | NA                         | NA                         | NA                  | NA                         |
| 0.28 (0.01 to 3.72)        | 0.3 (0.01 to 3.92)         | 0.38 (0.01 to 4.7)         | 0.57 (0.03 to 4.84) | 0.68 (0.23 to 1.81)        | 0.77 (0.15 to 3.01) | 0.79 (0.29 to 1.94)        | 0.92 (0.23 to 2.87)        | 0.97 (0.01 to 7.53) | Quetiapine                 | NA                  | NA                  | NA                  | 1.56 (0.27 to 3.83)        | NA                         | 0.82 (0.17 to 2.13) | <b>0.23 (0.06 to 0.73)</b> |
| 0.25 (0.06 to 1.17)        | 0.29 (0.06 to 1.28)        | 0.36 (0.06 to 1.89)        | 0.54 (0.18 to 1.47) | 0.65 (0.05 to 4.66)        | 0.74 (0.03 to 5.44) | 0.76 (0.06 to 4.93)        | 0.88 (0.06 to 5.51)        | 0.93 (0.03 to 6.44) | 0.96 (0.07 to 5.37)        | Chlorpromazine      | NA                  | NA                  | NA                         | 0.5 (0.12 to 1.44)         | NA                  | 0.35 (0.03 to 1.81)        |
| 0.22 (0.01 to 2.75)        | 0.24 (0 to 4.19)           | 0.3 (0.01 to 4.25)         | 0.46 (0.01 to 4.88) | 0.55 (0.01 to 5.85)        | 0.62 (0.01 to 6.04) | 0.63 (0.01 to 5.94)        | 0.73 (0.01 to 6.09)        | 0.78 (0.17 to 2.64) | 0.8 (0.01 to 6.08)         | 0.84 (0.04 to 5.44) | Fluphenazine LAI    | NA                  | NA                         | NA                         | NA                  | NA                         |
| 0.16 (0.01 to 2.16)        | 0.17 (0.01 to 2.28)        | 0.23 (0.01 to 2.74)        | 0.33 (0.01 to 2.82) | <b>0.39 (0.23 to 0.69)</b> | 0.45 (0.11 to 1.48) | <b>0.46 (0.27 to 0.76)</b> | 0.54 (0.19 to 1.31)        | 0.57 (0.01 to 4.43) | 0.59 (0.22 to 1.36)        | 0.62 (0.05 to 3.32) | 0.73 (0.01 to 4.51) | Risperidone         | NA                         | 0.51 (0.09 to 1.82)        | 0.61 (0.22 to 1.38) |                            |
| <b>0.11 (0.03 to 0.38)</b> | <b>0.12 (0.01 to 0.84)</b> | <b>0.16 (0.03 to 0.76)</b> | 0.24 (0.04 to 1.07) | 0.28 (0.01 to 2.29)        | 0.32 (0.01 to 2.57) | 0.33 (0.01 to 2.4)         | 0.38 (0.01 to 2.61)        | 0.4 (0.01 to 2.71)  | 0.41 (0.03 to 2.57)        | 0.43 (0.12 to 1.28) | 0.52 (0.03 to 2.84) | 0.71 (0.04 to 2.91) | Trifluoperazine            | NA                         | NA                  | NA                         |
| 0.1 (0 to 1.39)            | 0.11 (0 to 1.47)           | 0.14 (0 to 1.75)           | 0.21 (0.01 to 1.81) | <b>0.25 (0.07 to 0.8)</b>  | 0.28 (0.04 to 1.24) | <b>0.28 (0.09 to 0.87)</b> | 0.33 (0.07 to 1.19)        | 0.36 (0 to 2.8)     | <b>0.37 (0.11 to 0.99)</b> | 0.38 (0.03 to 2.12) | 0.46 (0 to 2.85)    | 0.63 (0.21 to 1.47) | 0.89 (0.06 to 2.74)        | Fluphenazine               | 1.14 (0.4 to 2.05)  |                            |
| 0.09 (0 to 1.14)           | 0.1 (0 to 1.21)            | 0.13 (0 to 1.48)           | 0.19 (0.02 to 1.52) | <b>0.23 (0.08 to 0.6)</b>  | 0.25 (0.05 to 1.02) | <b>0.27 (0.09 to 0.66)</b> | <b>0.31 (0.08 to 0.96)</b> | 0.33 (0 to 2.54)    | <b>0.34 (0.13 to 0.77)</b> | 0.35 (0.03 to 1.81) | 0.42 (0 to 2.6)     | 0.58 (0.25 to 1.14) | 0.82 (0.06 to 2.47)        | 0.92 (0.39 to 1.68)        | Haloperidol         |                            |

The original results given in OR (and their 95% CI) are transformed to RR (left lower half: treatment in column versus treatment in row; right upper half: treatment in row versus treatment in column) using the formula described above. For this transformation, we assumed a rate of using antiparkinsonian medication with clozapine of 24% as the control event rate (CER) for all comparisons of active antipsychotic versus clozapine.

Treatments are presented in order of efficacy ranking. Results of the network meta-analysis are reported in the left lower half and results of pairwise meta-analyses in the right upper half. Bold results indicate 95% CI excluding no effect. NA=not available.

## Forest plot of results of pairwise meta-analyses

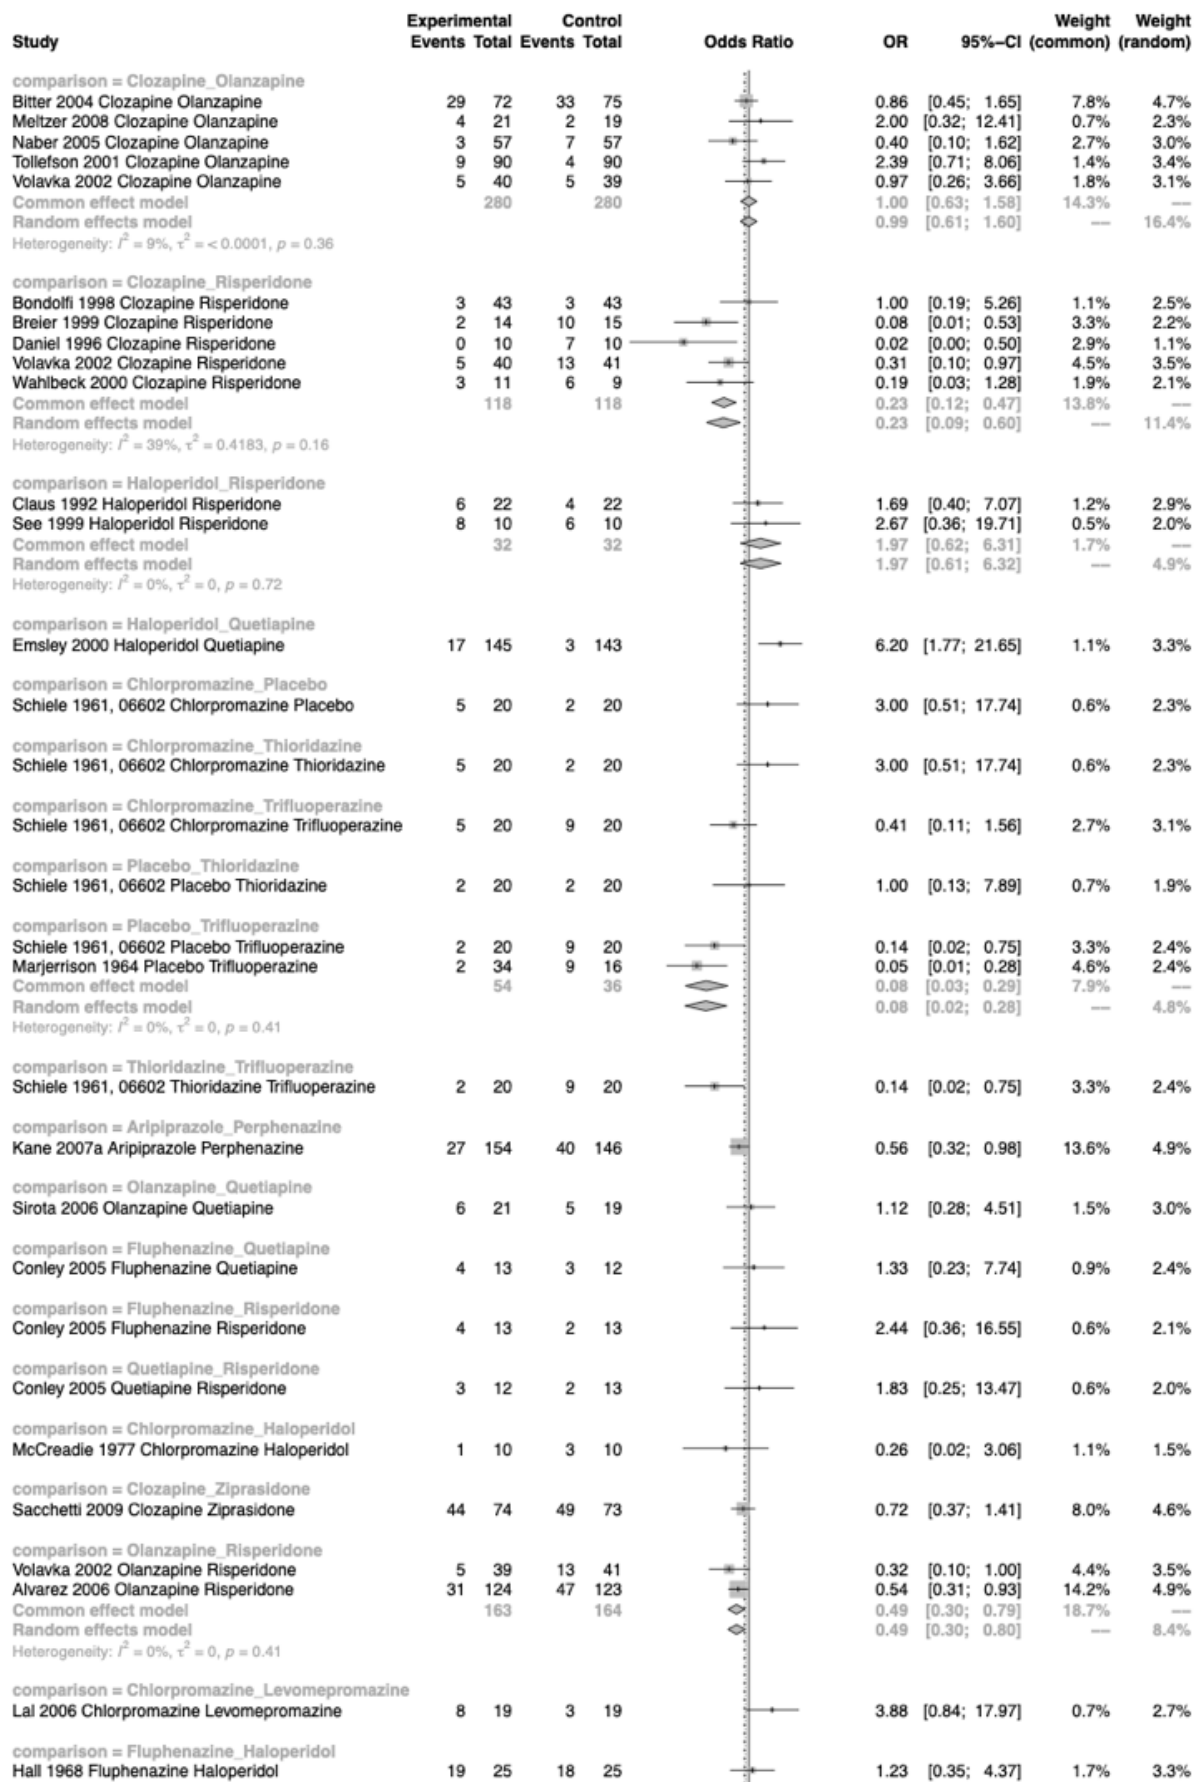

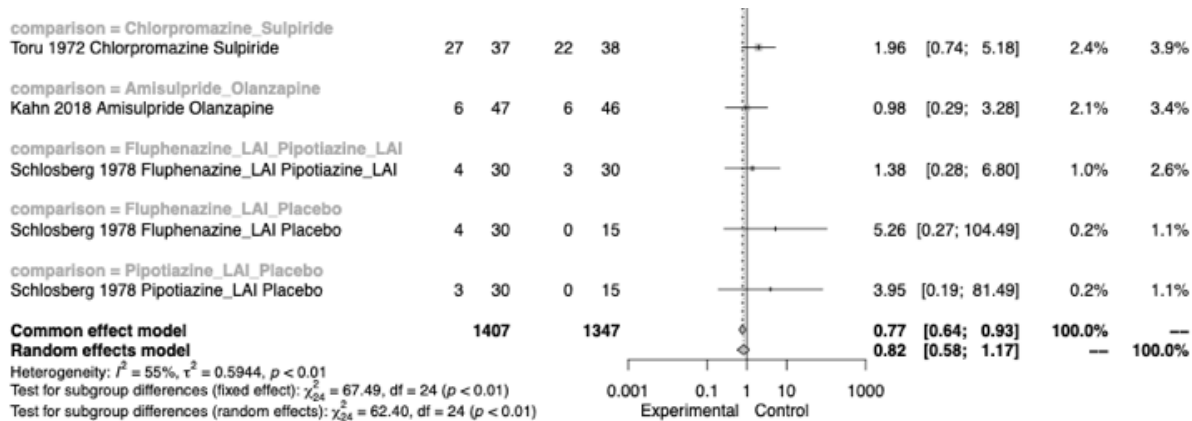

A summary effect size is calculated by pairwise meta-analyses of all studies of a specific comparison. The type of effect size measure is OR.

## 8.8 Prolactin levels

### Network plot

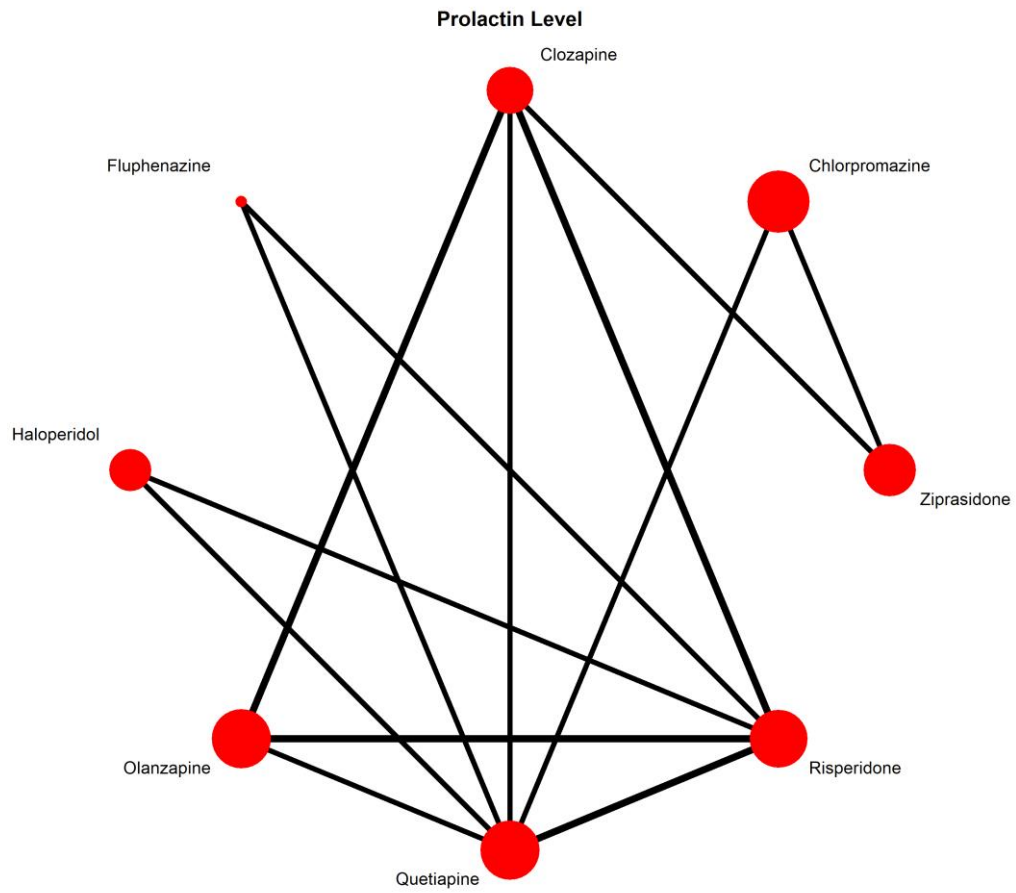

*Lines link treatments with direct comparisons in trials; thickness of lines corresponds to the number of trials evaluating the comparison; size of the nodes corresponds to the number of participants assigned to the treatment.*

**Forest-plot of results of network meta-analysis for antipsychotic drugs versus clozapine**

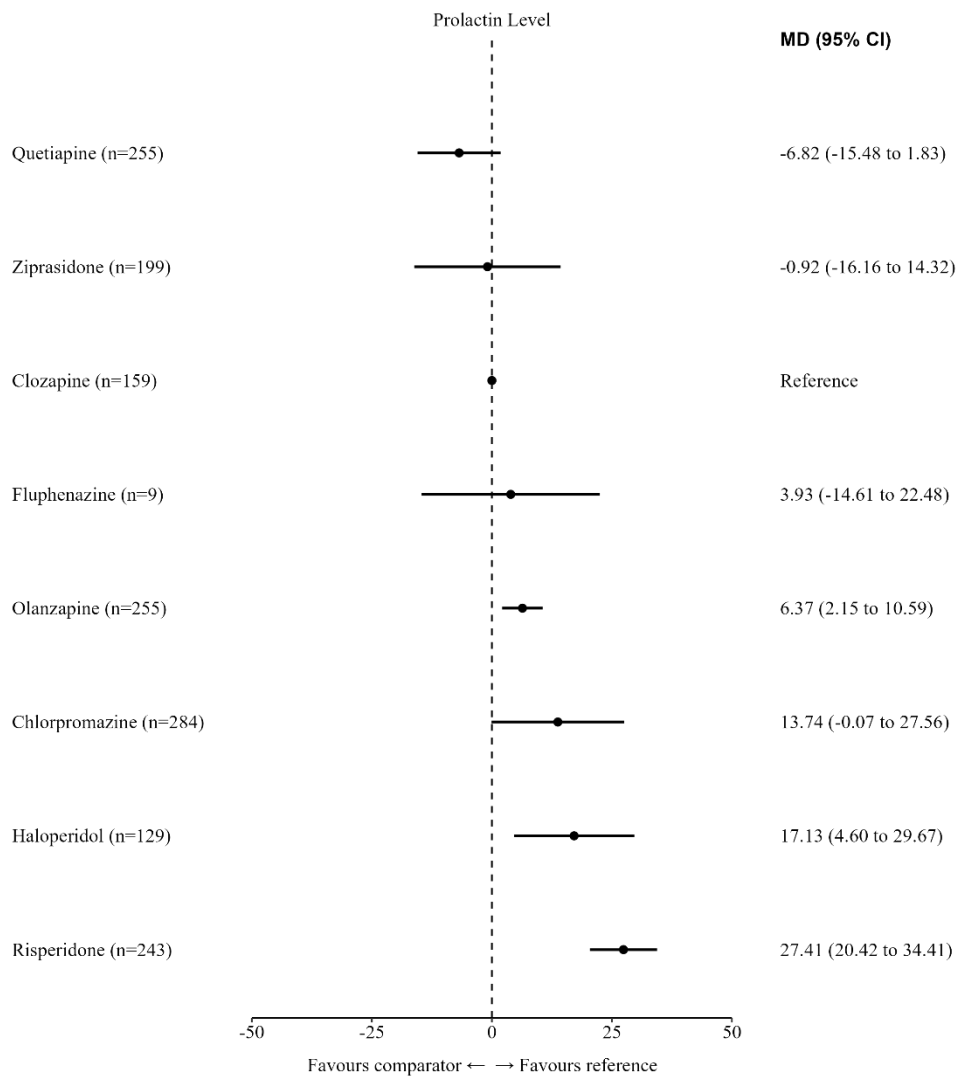

*Effect sizes, measured as mean difference (MD), are from the network meta-analysis. Order of treatments is according to the mean effect size. Reference is clozapine. The direction of the effect is indicated below the x-axis.*



**League table for the outcome: Prolactin levels**

|                                  |                                  |                                  |                                 |                                  |                                 |                                  |                                  |
|----------------------------------|----------------------------------|----------------------------------|---------------------------------|----------------------------------|---------------------------------|----------------------------------|----------------------------------|
| Quetiapine                       | NA                               | -5.60 (-16.21 to 5.01)           | -16.20 (-38.76 to 6.36)         | -9.10 (-19.87 to 1.67)           | <b>-19.70 (-33.28 to -6.12)</b> | <b>-27.40 (-43.45 to -11.35)</b> | <b>-32.90 (-44.86 to -20.95)</b> |
| -5.90 (-20.63 to 8.83)           | <b>Ziprasidone</b>               | 1.50 (-21.21 to 24.21)           | NA                              | NA                               | <b>-15.40 (-27.90 to -2.90)</b> | NA                               | NA                               |
| -6.82 (-15.48 to 1.83)           | -0.92 (-16.16 to 14.32)          | <b>Clozapine</b>                 | NA                              | <b>-5.38 (-9.73 to -1.04)</b>    | NA                              | NA                               | <b>-28.55 (-37.64 to -19.45)</b> |
| -10.76 (-29.29 to 7.78)          | -4.86 (-27.90 to 18.19)          | -3.93 (-22.48 to 14.61)          | <b>Fluphenazine</b>             | NA                               | NA                              | NA                               | <b>-26.20 (-45.08 to -7.32)</b>  |
| <b>-13.19 (-21.95 to -4.43)</b>  | -7.29 (-22.80 to 8.22)           | <b>-6.37 (-10.59 to -2.15)</b>   | -2.43 (-20.96 to 16.10)         | <b>Olanzapine</b>                | NA                              | NA                               | <b>-16.90 (-25.00 to -8.79)</b>  |
| <b>-20.57 (-32.74 to -8.39)</b>  | <b>-14.67 (-26.08 to -3.26)</b>  | -13.74 (-27.56 to 0.07)          | -9.81 (-31.62 to 12.00)         | -7.38 (-21.38 to 6.62)           | <b>Chlorpromazine</b>           | NA                               | NA                               |
| <b>-23.96 (-35.92 to -12.00)</b> | -18.06 (-36.38 to 0.27)          | <b>-17.13 (-29.67 to -4.60)</b>  | -13.20 (-33.80 to 7.40)         | -10.77 (-23.30 to 1.76)          | -3.39 (-20.07 to 13.28)         | <b>Haloperidol</b>               | -13.17 (-27.88 to 1.54)          |
| <b>-34.24 (-43.51 to -24.96)</b> | <b>-28.34 (-44.41 to -12.26)</b> | <b>-27.41 (-34.41 to -20.42)</b> | <b>-23.48 (-41.23 to -5.73)</b> | <b>-21.05 (-27.93 to -14.16)</b> | -13.67 (-28.16 to 0.82)         | -10.28 (-21.92 to 1.36)          | <b>Risperidone</b>               |

Treatments are presented in order of efficacy ranking. Results of the network meta-analysis are reported in the left lower half and results of pairwise meta-analyses in the right upper half. Each cell provides the effect estimate and the corresponding 95% credible interval (95% CI) of a comparison (left lower half: treatment in column versus treatment in row; right upper half: treatment in row versus treatment in column). The type of effect size measure is mean difference (MD). Bold results indicate 95% CI excluding no effect. NA=not available.

## Forest plot of results of pairwise meta-analyses

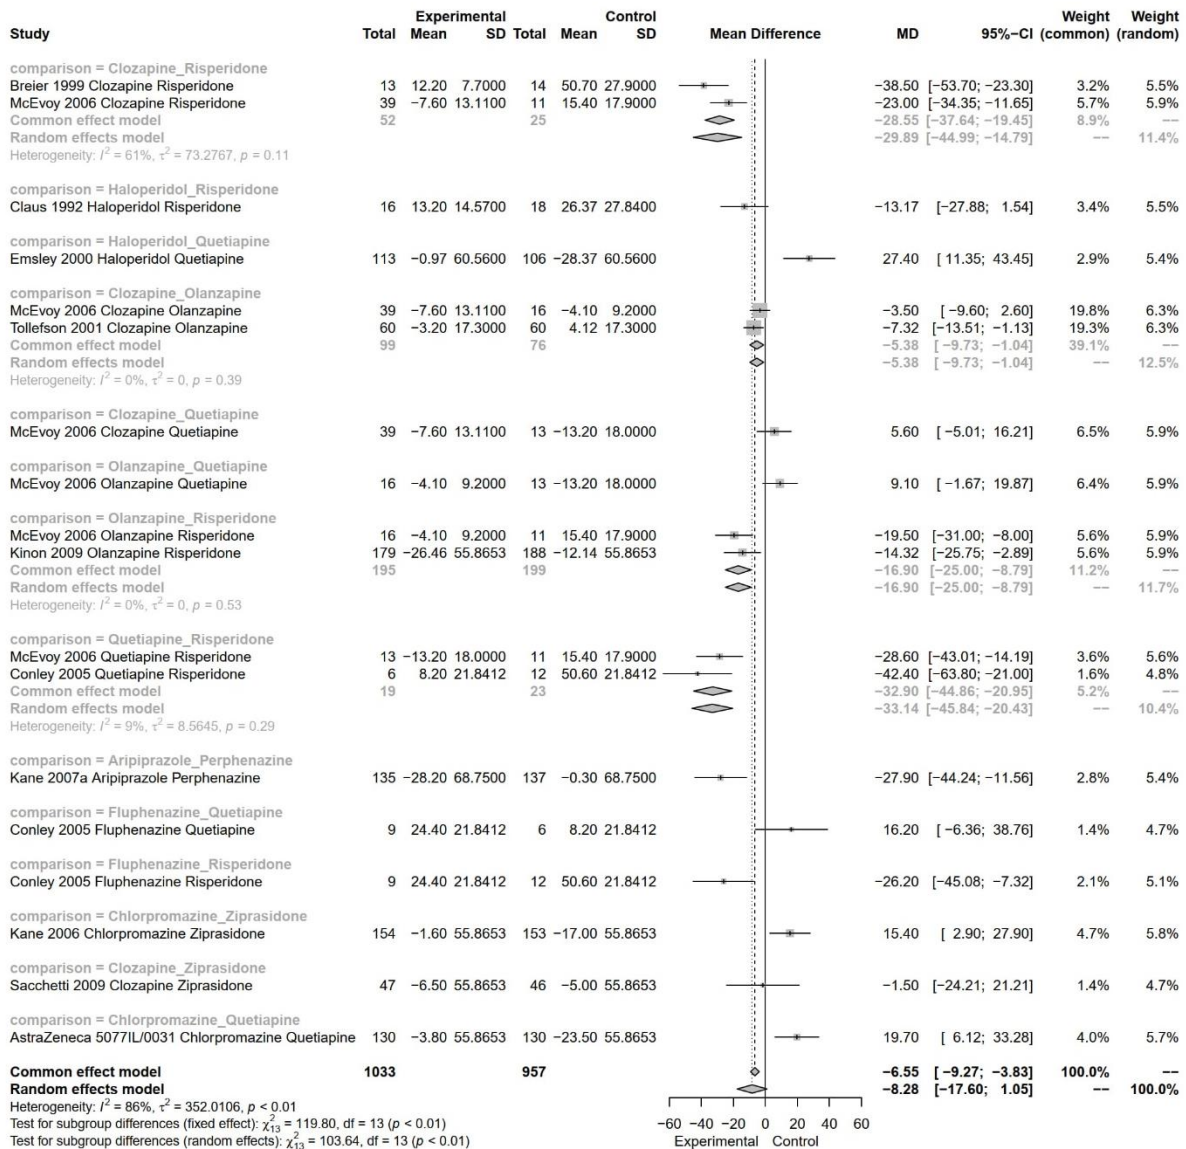

A summary effect size is calculated by pairwise meta-analyses of all studies of a specific comparison. The type of effect size measure is mean difference (MD).

## 8.9 Sedation

We transformed the original ORs to RRs and EERs vs. CER assuming the baseline risk of sedation with clozapine of 47% (namely CER). 47% was the average risk of sedation with clozapine across all clozapine-arms in the network meta-analysis, as estimated by a single-arm meta-analysis of proportions.

### Network plot

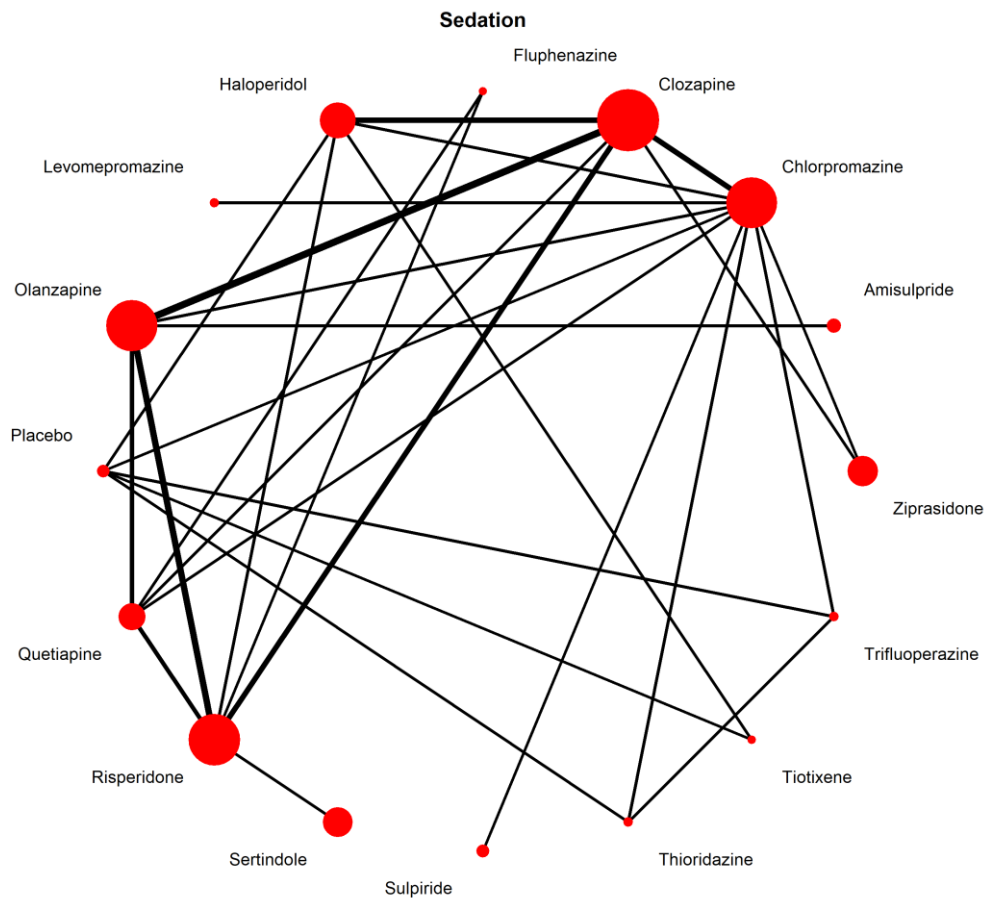

*Lines link treatments with direct comparisons in trials; thickness of lines corresponds to the number of trials evaluating the comparison; size of the nodes corresponds to the number of participants assigned to the treatment.*

**Forest-plot of results of network meta-analysis for antipsychotic drugs versus clozapine**

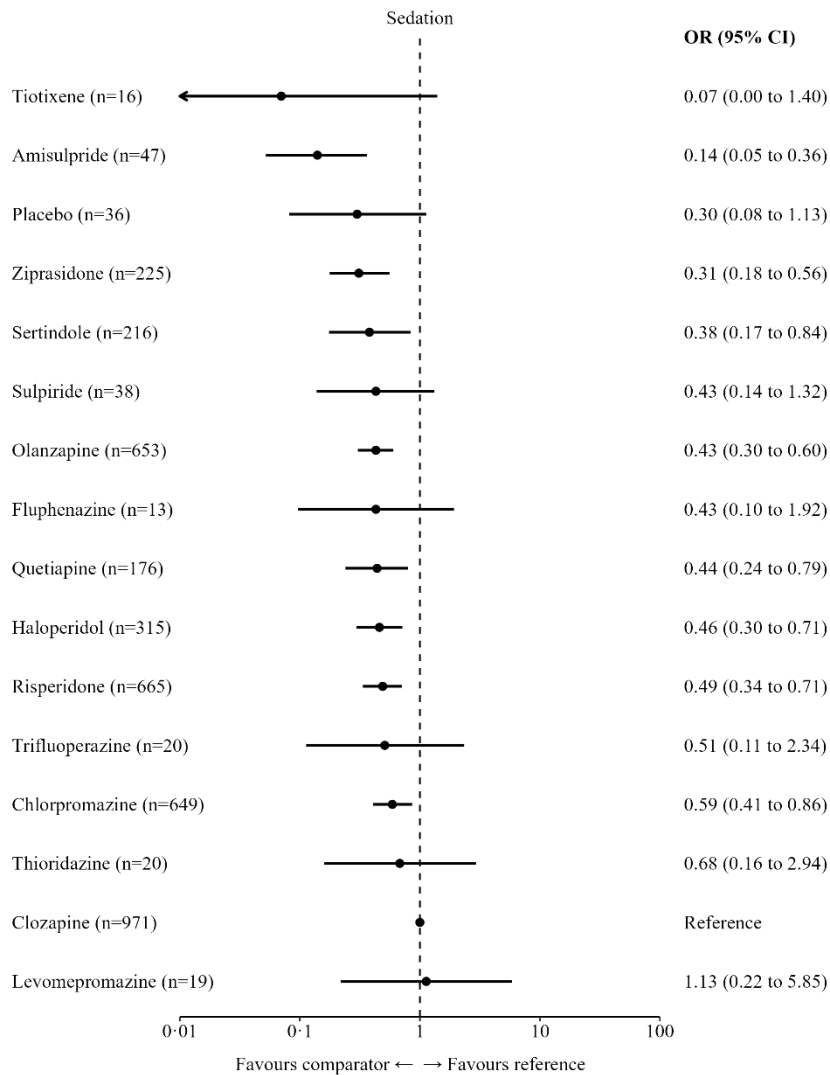

*Effect sizes, measured as odds ratio (OR), are from the network meta-analysis. Order of treatments is according to the mean effect size. Reference is clozapine. The direction of the effect is indicated below the x-axis.*

**Forest plot with RR and EER versus CER**

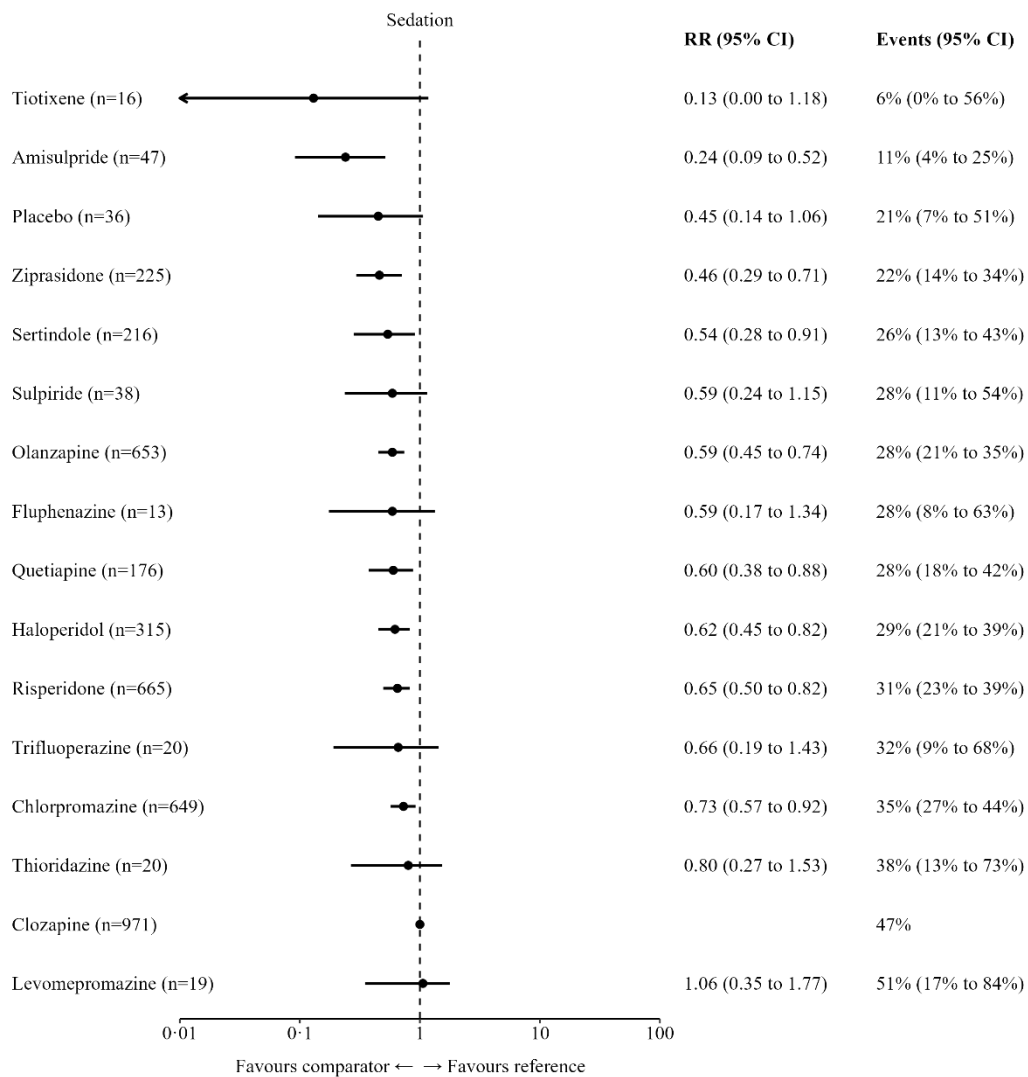

*For this forest plot, we transformed the original OR to RR and exposure events rates (EER, called “events” in the forest plot) using the formula indicated above. Therefore, we used an average sedation rate with clozapine of 47% as the control event rate (CER).*

*Effect sizes are from the network meta-analysis. Order of treatments is according to the mean effect size. Reference is clozapine. The direction of the effect is indicated below the x-axis*

### League table for the outcome: Sedation (OR)

|                      |                            |                     |                            |                            |                     |                            |                     |                            |                            |                            |                     |                             |                     |                            |                            |    |
|----------------------|----------------------------|---------------------|----------------------------|----------------------------|---------------------|----------------------------|---------------------|----------------------------|----------------------------|----------------------------|---------------------|-----------------------------|---------------------|----------------------------|----------------------------|----|
| Tiotixene            | NA                         | 0.31 (0.01 to 8.28) | NA                         | NA                         | NA                  | NA                         | NA                  | NA                         | NA                         | 0.13 (0.01 to 2.64)        | NA                  | NA                          | NA                  | NA                         | NA                         | NA |
| 0.49 (0.02 to 11.78) | Amisulpride                | NA                  | NA                         | NA                         | NA                  | <b>0.32 (0.13 to 0.80)</b> | NA                  | NA                         | NA                         | NA                         | NA                  | NA                          | NA                  | NA                         | NA                         | NA |
| 0.22 (0.01 to 4.99)  | 0.45 (0.09 to 2.30)        | Placebo             | NA                         | NA                         | NA                  | NA                         | NA                  | NA                         | NA                         | 0.40 (0.05 to 3.09)        | NA                  | 0.71 (0.14 to 3.66)         | 0.71 (0.14 to 3.66) | 0.53 (0.11 to 2.60)        | NA                         | NA |
| 0.22 (0.01 to 4.64)  | 0.44 (0.14 to 1.32)        | 0.96 (0.24 to 3.84) | Ziprasidone                | NA                         | NA                  | NA                         | NA                  | NA                         | NA                         | NA                         | NA                  | NA                          | 0.59 (0.35 to 1.01) | NA                         | <b>0.19 (0.06 to 0.61)</b> | NA |
| 0.18 (0.01 to 4.01)  | 0.36 (0.11 to 1.21)        | 0.79 (0.17 to 3.62) | 0.82 (0.32 to 2.14)        | Sertindole                 | NA                  | NA                         | NA                  | NA                         | NA                         | NA                         | 0.79 (0.39 to 1.56) | NA                          | NA                  | NA                         | NA                         | NA |
| 0.16 (0.01 to 3.96)  | 0.32 (0.07 to 1.40)        | 0.71 (0.13 to 3.81) | 0.74 (0.23 to 2.38)        | 0.90 (0.23 to 3.51)        | Sulpiride           | NA                         | NA                  | NA                         | NA                         | NA                         | NA                  | NA                          | 0.72 (0.25 to 2.09) | NA                         | NA                         | NA |
| 0.16 (0.01 to 3.32)  | <b>0.32 (0.13 to 0.80)</b> | 0.71 (0.18 to 2.72) | 0.74 (0.39 to 1.39)        | 0.90 (0.40 to 2.00)        | 1.00 (0.31 to 3.18) | Olanzapine                 | NA                  | 0.92 (0.24 to 3.58)        | NA                         | 1.02 (0.58 to 1.81)        | NA                  | 0.51 (0.21 to 1.21)         | NA                  | <b>0.44 (0.29 to 0.67)</b> | NA                         | NA |
| 0.16 (0.01 to 4.56)  | 0.32 (0.05 to 1.85)        | 0.70 (0.10 to 5.05) | 0.73 (0.15 to 3.52)        | 0.89 (0.17 to 4.53)        | 0.99 (0.16 to 6.27) | 0.99 (0.22 to 4.48)        | Fluphenazine        | 1.33 (0.23 to 7.74)        | NA                         | 0.71 (0.14 to 3.61)        | NA                  | NA                          | NA                  | NA                         | NA                         | NA |
| 0.16 (0.01 to 3.36)  | <b>0.31 (0.10 to 0.96)</b> | 0.69 (0.17 to 2.81) | 0.72 (0.35 to 1.49)        | 0.88 (0.34 to 2.28)        | 0.98 (0.29 to 3.24) | 0.98 (0.51 to 1.86)        | 0.99 (0.22 to 4.44) | Quetiapine                 | NA                         | 0.94 (0.30 to 2.99)        | NA                  | 0.72 (0.37 to 1.38)         | NA                  | 0.61 (0.18 to 2.06)        | NA                         | NA |
| 0.15 (0.01 to 2.98)  | <b>0.30 (0.10 to 0.86)</b> | 0.66 (0.18 to 2.48) | 0.68 (0.34 to 1.39)        | 0.83 (0.35 to 2.01)        | 0.93 (0.28 to 3.09) | 0.93 (0.54 to 1.60)        | 0.94 (0.20 to 4.42) | 0.95 (0.46 to 1.97)        | Haloperidol                | 0.82 (0.23 to 2.85)        | NA                  | <b>9.33 (1.19 to 72.99)</b> | NA                  | <b>0.40 (0.24 to 0.65)</b> | NA                         | NA |
| 0.14 (0.01 to 2.91)  | <b>0.28 (0.10 to 0.77)</b> | 0.62 (0.16 to 2.41) | 0.65 (0.33 to 1.26)        | 0.79 (0.39 to 1.56)        | 0.88 (0.27 to 2.84) | 0.88 (0.58 to 1.33)        | 0.89 (0.20 to 3.88) | 0.90 (0.46 to 1.74)        | 0.94 (0.55 to 1.63)        | Risperidone                | NA                  | NA                          | NA                  | <b>0.50 (0.31 to 0.80)</b> | NA                         | NA |
| 0.13 (0.00 to 3.56)  | 0.27 (0.04 to 1.60)        | 0.59 (0.13 to 2.77) | 0.61 (0.13 to 2.91)        | 0.75 (0.14 to 4.07)        | 0.83 (0.13 to 5.16) | 0.83 (0.18 to 3.88)        | 0.84 (0.10 to 6.91) | 0.85 (0.18 to 4.12)        | 0.89 (0.19 to 4.21)        | 0.95 (0.20 to 4.48)        | Trifluoperazine     | 1.00 (0.21 to 4.71)         | 0.75 (0.17 to 3.33) | NA                         | NA                         | NA |
| 0.11 (0.01 to 2.38)  | <b>0.23 (0.08 to 0.64)</b> | 0.51 (0.14 to 1.88) | <b>0.53 (0.33 to 0.87)</b> | 0.65 (0.28 to 1.51)        | 0.72 (0.25 to 2.09) | 0.72 (0.46 to 1.14)        | 0.73 (0.16 to 3.29) | 0.74 (0.42 to 1.28)        | 0.77 (0.44 to 1.35)        | 0.82 (0.50 to 1.36)        | 0.87 (0.20 to 3.82) | Chlorpromazine              | 0.75 (0.17 to 3.33) | 0.67 (0.42 to 1.09)        | 0.52 (0.11 to 2.60)        | NA |
| 0.10 (0.00 to 2.60)  | 0.20 (0.04 to 1.14)        | 0.44 (0.10 to 1.96) | 0.46 (0.10 to 2.06)        | 0.56 (0.11 to 2.89)        | 0.62 (0.11 to 3.69) | 0.62 (0.14 to 2.74)        | 0.63 (0.08 to 4.97) | 0.64 (0.14 to 2.92)        | 0.67 (0.15 to 2.98)        | 0.71 (0.16 to 3.17)        | 0.75 (0.17 to 3.33) | 0.87 (0.21 to 3.59)         | Thioridazine        | NA                         | NA                         | NA |
| 0.07 (0.00 to 1.40)  | <b>0.14 (0.05 to 0.36)</b> | 0.30 (0.08 to 1.13) | <b>0.31 (0.18 to 0.56)</b> | <b>0.38 (0.17 to 0.84)</b> | 0.43 (0.14 to 1.32) | <b>0.43 (0.30 to 0.60)</b> | 0.43 (0.10 to 1.92) | <b>0.44 (0.24 to 0.79)</b> | <b>0.46 (0.30 to 0.71)</b> | <b>0.49 (0.34 to 0.71)</b> | 0.51 (0.11 to 2.34) | <b>0.59 (0.41 to 0.86)</b>  | 0.68 (0.16 to 2.94) | Clozapine                  | NA                         | NA |
| 0.06 (0.00 to 1.86)  | <b>0.12 (0.02 to 0.81)</b> | 0.27 (0.03 to 2.11) | 0.28 (0.05 to 1.49)        | 0.34 (0.06 to 2.08)        | 0.38 (0.06 to 2.59) | 0.38 (0.07 to 2.00)        | 0.38 (0.04 to 3.45) | 0.39 (0.07 to 2.10)        | 0.41 (0.07 to 2.22)        | 0.43 (0.08 to 2.31)        | 0.45 (0.05 to 4.04) | 0.52 (0.11 to 2.60)         | 0.61 (0.07 to 5.17) | 0.89 (0.17 to 4.59)        | Levomepromazine            | NA |

Treatments are presented in order of efficacy ranking. Results of the network meta-analysis are reported in the left lower half and results of pairwise meta-analyses in the right upper half. Each cell provides the effect estimate and the corresponding 95% credible interval (95% CI) of a comparison (left lower half: treatment in column versus treatment in row; right upper half: treatment in row versus treatment in column). The type of effect size measure is odd ratio (OR). Bold results indicate 95% CI excluding no effect. NA=not available.

**League table for the outcome: Sedation (RR)**

|                     |                            |                     |                            |                            |                     |                            |                     |                            |                            |                            |                     |                           |                     |                            |                           |    |
|---------------------|----------------------------|---------------------|----------------------------|----------------------------|---------------------|----------------------------|---------------------|----------------------------|----------------------------|----------------------------|---------------------|---------------------------|---------------------|----------------------------|---------------------------|----|
| Tiotixene           | NA                         | 0.53 (0.02 to 1.55) | NA                         | NA                         | NA                  | NA                         | NA                  | NA                         | NA                         | 0.33 (0.03 to 1.24)        | NA                  | NA                        | NA                  | NA                         | NA                        | NA |
| 0.62 (0.03 to 2.21) | Amisulpride                | NA                  | NA                         | NA                         | NA                  | <b>0.59 (0.32 to 0.93)</b> | NA                  | NA                         | NA                         | NA                         | NA                  | NA                        | NA                  | NA                         | NA                        | NA |
| 0.41 (0.02 to 1.47) | 0.67 (0.2 to 1.29)         | Placebo             | NA                         | NA                         | NA                  | NA                         | NA                  | NA                         | NA                         | 0.68 (0.15 to 1.26)        | NA                  | 0.9 (0.36 to 1.26)        | 0.91 (0.39 to 1.23) | 0.83 (0.35 to 1.16)        | NA                        | NA |
| 0.42 (0.02 to 1.45) | 0.67 (0.29 to 1.11)        | 0.98 (0.44 to 1.41) | Ziprasidone                | NA                         | NA                  | NA                         | NA                  | NA                         | NA                         | NA                         | NA                  | NA                        | 0.85 (0.68 to 1)    | NA                         | <b>0.58 (0.27 to 0.9)</b> | NA |
| 0.39 (0.03 to 1.35) | 0.62 (0.26 to 1.06)        | 0.92 (0.37 to 1.34) | 0.93 (0.57 to 1.23)        | Sertindole                 | NA                  | NA                         | NA                  | NA                         | NA                         | NA                         | 0.93 (0.68 to 1.12) | NA                        | NA                  | NA                         | NA                        | NA |
| 0.37 (0.03 to 1.32) | 0.59 (0.19 to 1.1)         | 0.88 (0.32 to 1.31) | 0.9 (0.48 to 1.23)         | 0.97 (0.48 to 1.3)         | Sulpiride           | NA                         | NA                  | NA                         | NA                         | NA                         | NA                  | NA                        | 0.91 (0.57 to 1.15) | NA                         | NA                        | NA |
| 0.37 (0.03 to 1.29) | <b>0.59 (0.32 to 0.93)</b> | 0.88 (0.4 to 1.26)  | 0.9 (0.66 to 1.1)          | 0.97 (0.67 to 1.19)        | 1 (0.58 to 1.29)    | Olanzapine                 | NA                  | 0.97 (0.5 to 1.3)          | NA                         | 1.01 (0.82 to 1.15)        | NA                  | 0.8 (0.51 to 1.05)        | NA                  | <b>0.82 (0.71 to 0.92)</b> | NA                        | NA |
| 0.37 (0.03 to 1.33) | 0.59 (0.14 to 1.17)        | 0.88 (0.26 to 1.35) | 0.89 (0.35 to 1.3)         | 0.96 (0.39 to 1.33)        | 1 (0.37 to 1.37)    | 1 (0.47 to 1.33)           | Fluphenazine        | 1.09 (0.48 to 1.38)        | NA                         | 0.89 (0.36 to 1.27)        | NA                  | NA                        | NA                  | NA                         | NA                        | NA |
| 0.37 (0.03 to 1.29) | <b>0.58 (0.26 to 0.99)</b> | 0.87 (0.39 to 1.26) | 0.89 (0.63 to 1.12)        | 0.96 (0.62 to 1.22)        | 0.99 (0.56 to 1.28) | 0.99 (0.77 to 1.17)        | 1 (0.47 to 1.33)    | Quetiapine                 | NA                         | 0.98 (0.59 to 1.24)        | NA                  | 0.91 (0.7 to 1.08)        | NA                  | 0.9 (0.56 to 1.1)          | NA                        | NA |
| 0.36 (0.03 to 1.26) | <b>0.58 (0.27 to 0.95)</b> | 0.86 (0.42 to 1.23) | 0.87 (0.63 to 1.09)        | 0.94 (0.64 to 1.18)        | 0.98 (0.56 to 1.26) | 0.98 (0.79 to 1.13)        | 0.98 (0.45 to 1.31) | 0.98 (0.73 to 1.18)        | Haloperidol                | 0.94 (0.5 to 1.24)         | NA                  | <b>1.3 (1.04 to 1.34)</b> | NA                  | <b>0.8 (0.65 to 0.92)</b>  | NA                        | NA |
| 0.36 (0.03 to 1.24) | <b>0.57 (0.27 to 0.92)</b> | 0.85 (0.39 to 1.21) | 0.86 (0.63 to 1.06)        | 0.93 (0.68 to 1.12)        | 0.96 (0.56 to 1.24) | 0.96 (0.82 to 1.08)        | 0.96 (0.46 to 1.28) | 0.97 (0.74 to 1.14)        | 0.98 (0.81 to 1.13)        | Risperidone                | NA                  | NA                        | NA                  | <b>0.85 (0.73 to 0.96)</b> | NA                        | NA |
| 0.35 (0 to 1.26)    | 0.57 (0.13 to 1.12)        | 0.84 (0.35 to 1.22) | 0.85 (0.35 to 1.23)        | 0.91 (0.36 to 1.27)        | 0.95 (0.35 to 1.3)  | 0.95 (0.44 to 1.27)        | 0.95 (0.28 to 1.32) | 0.95 (0.44 to 1.27)        | 0.97 (0.45 to 1.28)        | 0.99 (0.47 to 1.28)        | Trifluoperazine     | 1 (0.51 to 1.25)          | 0.93 (0.47 to 1.19) | NA                         | NA                        | NA |
| 0.33 (0.04 to 1.17) | <b>0.54 (0.25 to 0.87)</b> | 0.8 (0.39 to 1.14)  | <b>0.82 (0.66 to 0.96)</b> | 0.88 (0.6 to 1.09)         | 0.91 (0.57 to 1.15) | 0.91 (0.77 to 1.03)        | 0.91 (0.43 to 1.22) | 0.92 (0.74 to 1.06)        | 0.93 (0.75 to 1.07)        | 0.95 (0.8 to 1.07)         | 0.96 (0.49 to 1.23) | Chlorpromazine            | 0.93 (0.47 to 1.19) | 0.92 (0.81 to 1.01)        | 0.88 (0.44 to 1.1)        | NA |
| 0.33 (0 to 1.16)    | 0.52 (0.15 to 1.03)        | 0.77 (0.33 to 1.13) | 0.79 (0.33 to 1.13)        | 0.85 (0.35 to 1.18)        | 0.88 (0.35 to 1.2)  | 0.88 (0.41 to 1.17)        | 0.88 (0.27 to 1.22) | 0.89 (0.41 to 1.18)        | 0.9 (0.43 to 1.18)         | 0.91 (0.45 to 1.19)        | 0.93 (0.47 to 1.19) | 0.97 (0.54 to 1.2)        | Thioridazine        | NA                         | NA                        | NA |
| 0.31 (0 to 1.05)    | <b>0.49 (0.24 to 0.77)</b> | 0.72 (0.34 to 1.02) | <b>0.73 (0.56 to 0.88)</b> | <b>0.78 (0.55 to 0.97)</b> | 0.82 (0.49 to 1.04) | <b>0.82 (0.72 to 0.9)</b>  | 0.82 (0.4 to 1.09)  | <b>0.82 (0.65 to 0.96)</b> | <b>0.83 (0.72 to 0.94)</b> | <b>0.85 (0.75 to 0.94)</b> | 0.86 (0.42 to 1.11) | <b>0.89 (0.8 to 0.97)</b> | 0.93 (0.53 to 1.13) | Clozapine                  | NA                        | NA |
| 0.29 (0 to 1.08)    | <b>0.47 (0.12 to 0.97)</b> | 0.71 (0.17 to 1.09) | 0.72 (0.25 to 1.05)        | 0.77 (0.29 to 1.09)        | 0.8 (0.29 to 1.1)   | 0.8 (0.33 to 1.08)         | 0.8 (0.21 to 1.12)  | 0.81 (0.33 to 1.09)        | 0.82 (0.33 to 1.09)        | 0.83 (0.36 to 1.1)         | 0.84 (0.25 to 1.13) | 0.88 (0.44 to 1.1)        | 0.91 (0.33 to 1.14) | 0.98 (0.57 to 1.14)        | Levomepromazine           | NA |

The original results given in OR (and their 95% CI) are transformed to RR (left lower half: treatment in column versus treatment in row; right upper half: treatment in row versus treatment in column) using the formula described above. For this transformation, we assumed a sedation rate with clozapine of 47% as the control event rate (CER) for all comparisons of active antipsychotic versus clozapine.

Treatments are presented in order of efficacy ranking. Results of the network meta-analysis are reported in the left lower half and results of pairwise meta-analyses in the right upper half. Bold results indicate 95% CI excluding no effect. NA=not available.

## Forest plot of results of pairwise meta-analyses

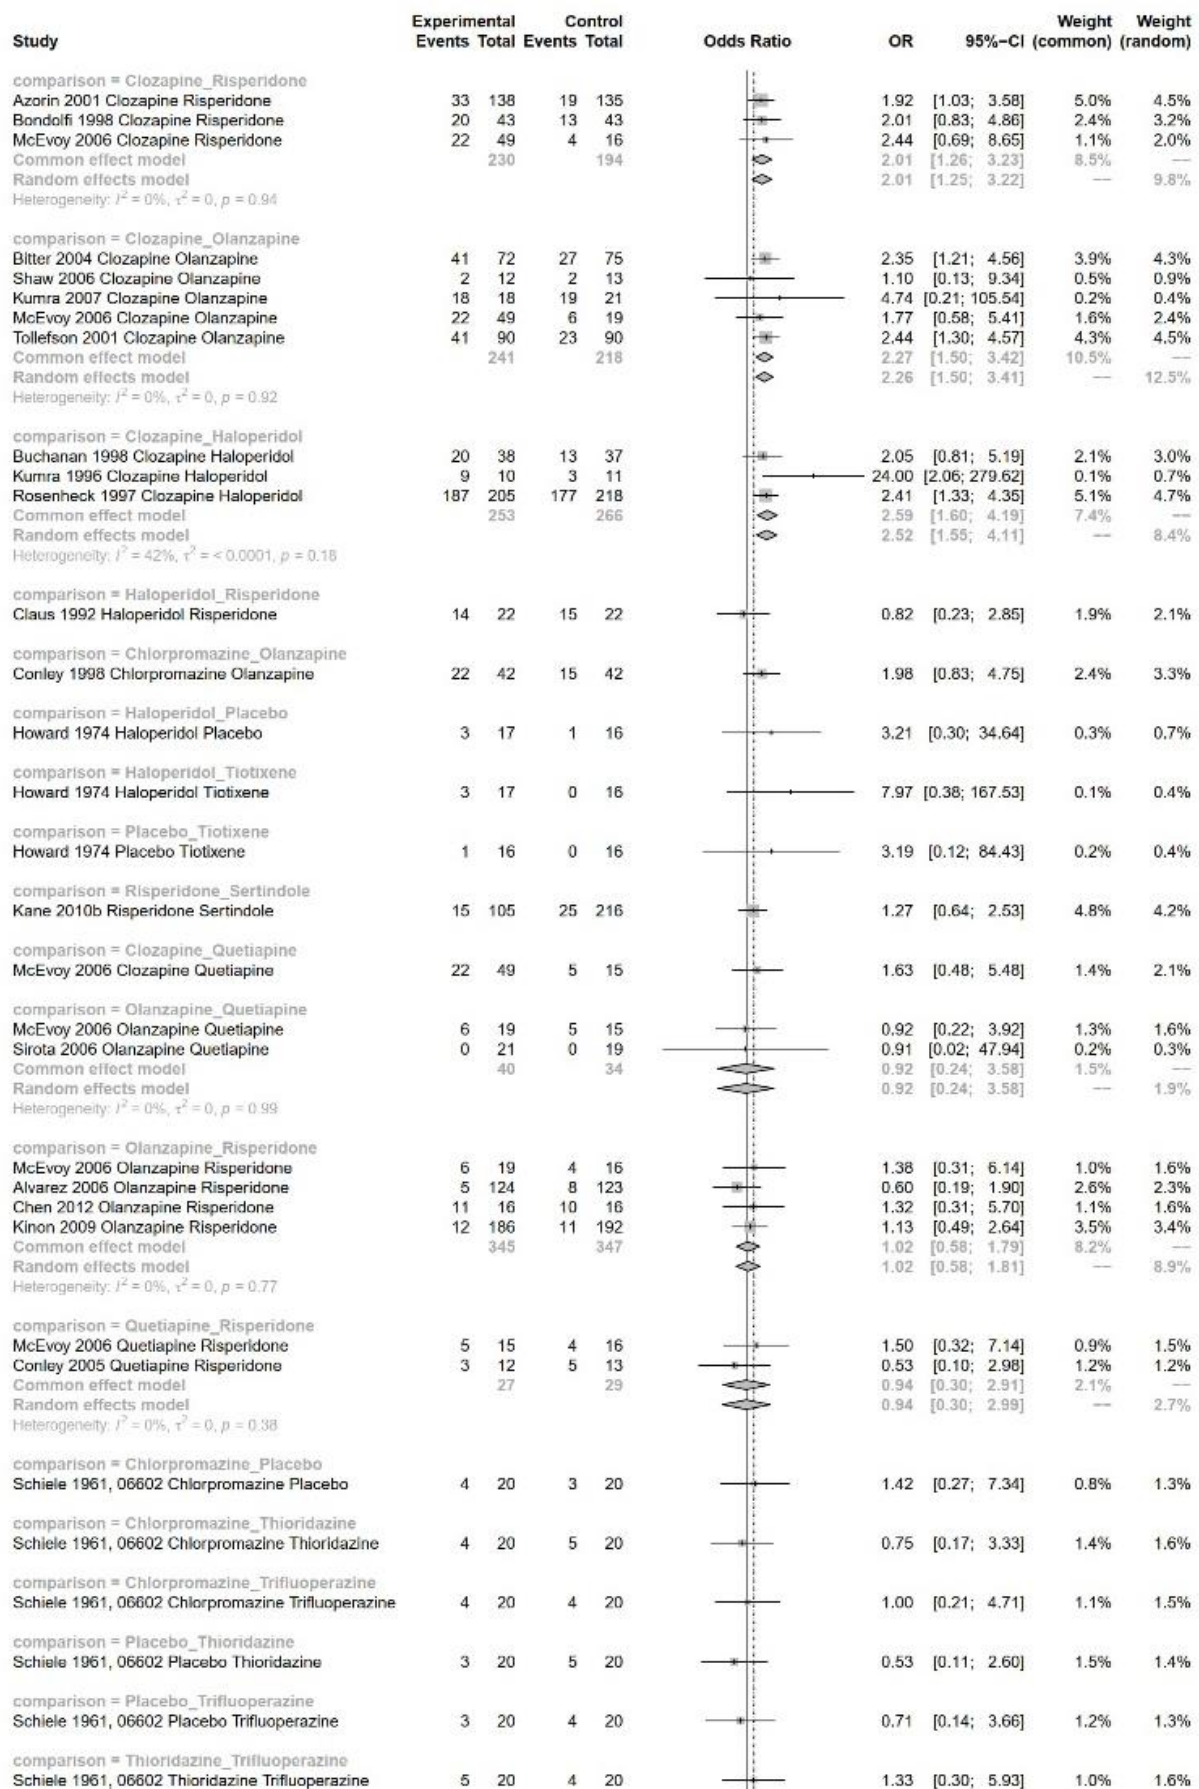



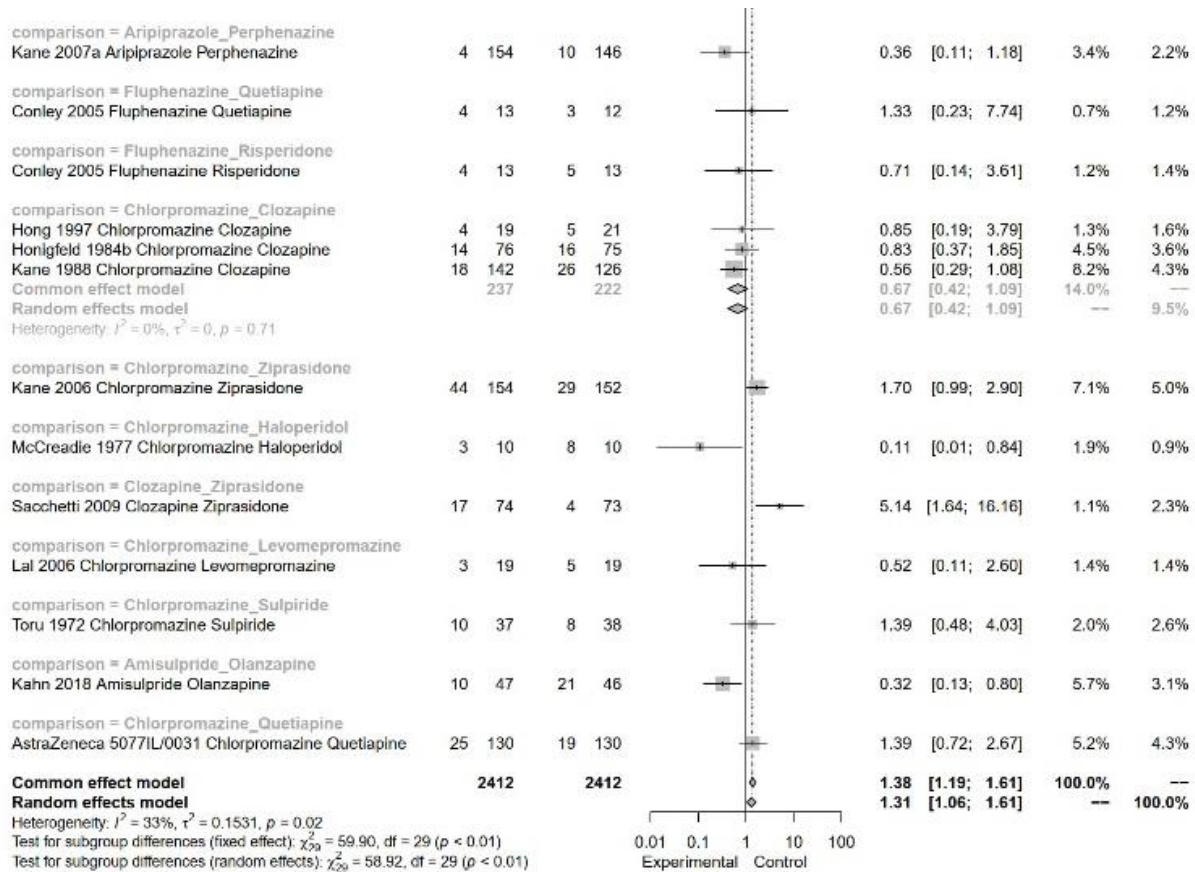

A summary effect size is calculated by pairwise meta-analyses of all studies of a specific comparison. The type of effect size measure is OR.

## 8.10 Weight gain

### Network plot

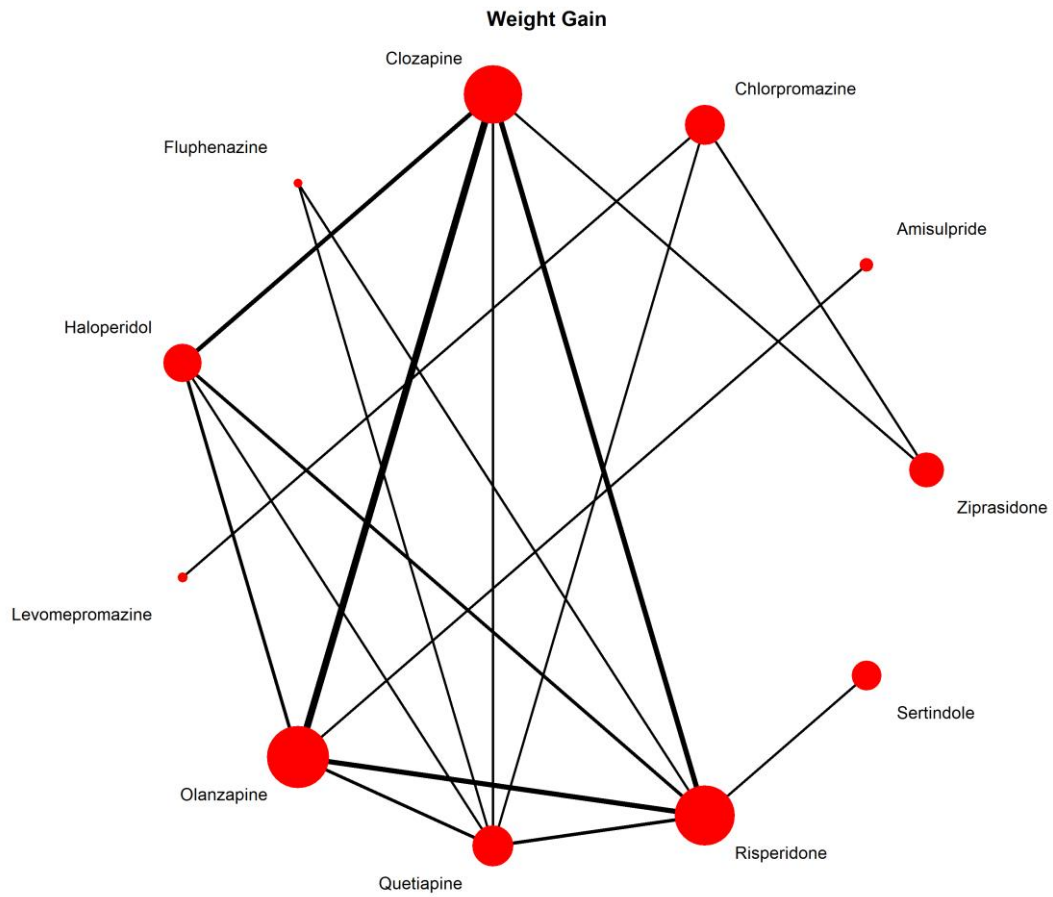

*Lines link treatments with direct comparisons in trials; thickness of lines corresponds to the number of trials evaluating the comparison; size of the nodes corresponds to the number of participants assigned to the treatment.*

**Forest-plot of results of network meta-analysis for antipsychotic drugs versus clozapine**

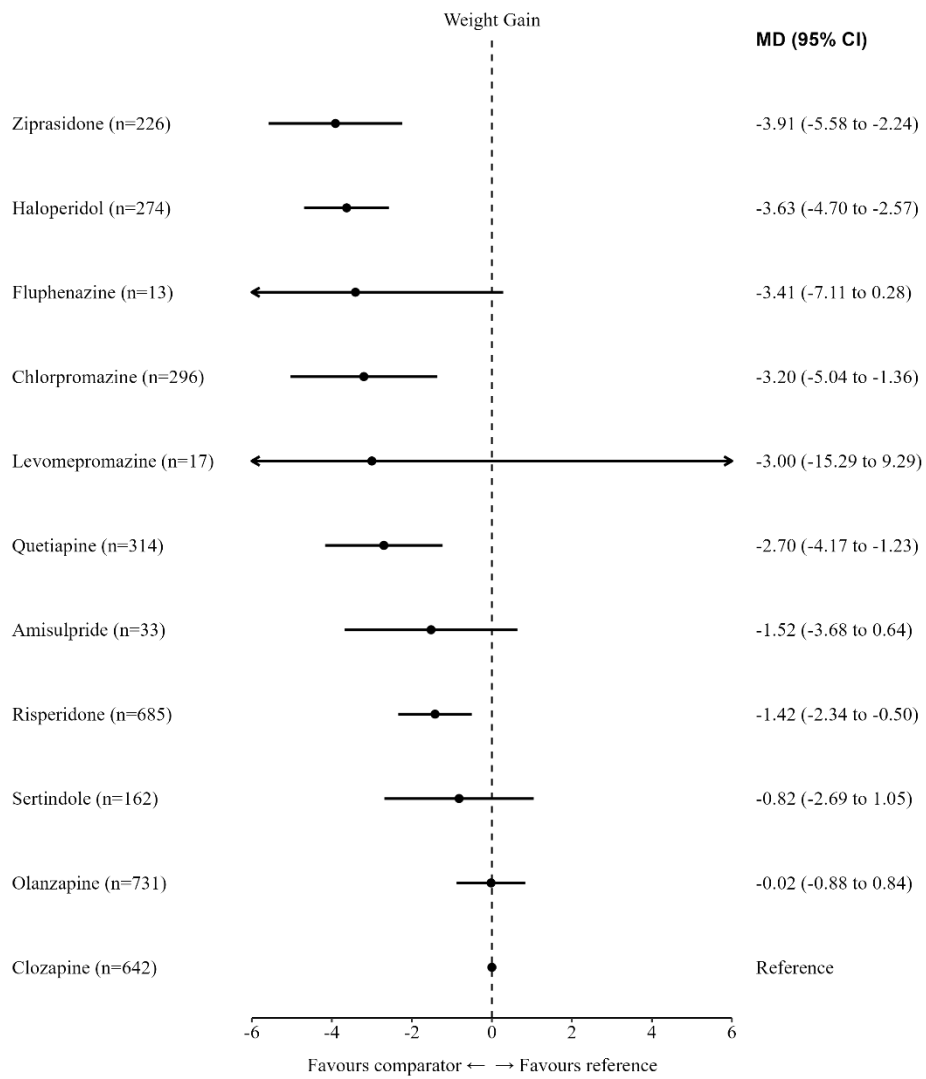

*Effect sizes, measured as mean difference (MD), are from the network meta-analysis. Order of treatments is according to the mean effect size. Reference is clozapine. The direction of the effect is indicated below the x-axis.*

**League table for the outcome: Weight gain**

|                               |                               |                         |                               |                               |                         |                       |                               |                       |                               |                               |                               |
|-------------------------------|-------------------------------|-------------------------|-------------------------------|-------------------------------|-------------------------|-----------------------|-------------------------------|-----------------------|-------------------------------|-------------------------------|-------------------------------|
| <b>Ziprasidone</b>            | NA                            | NA                      | -1.09 (-2.91 to 0.73)         | NA                            | NA                      | NA                    | NA                            | NA                    | NA                            | NA                            | <b>-3.46 (-5.45 to -1.47)</b> |
| -0.28 (-2.13 to 1.58)         | <b>Haloperidol</b>            | NA                      | NA                            | -0.70 (-2.56 to 1.16)         | NA                      | NA                    | <b>-1.99 (-3.52 to -0.45)</b> | NA                    | <b>-5.06 (-6.97 to -3.14)</b> | <b>-3.55 (-4.92 to -2.17)</b> |                               |
| -0.50 (-4.51 to 3.52)         | -0.22 (-3.97 to 3.52)         | <b>Fluphenazine</b>     | NA                            | -1.40 (-8.58 to 5.78)         | NA                      | NA                    | -1.95 (-5.56 to 1.66)         | NA                    | NA                            | NA                            |                               |
| -0.71 (-2.29 to 0.87)         | -0.44 (-2.34 to 1.47)         | -0.22 (-4.27 to 3.84)   | <b>Chlorpromazine</b>         | -0.91 (-2.81 to 0.99)         | -0.20 (-12.35 to 11.95) | NA                    | NA                            | NA                    | NA                            | NA                            |                               |
| -1.21 (-3.05 to 0.63)         | -0.93 (-2.33 to 0.46)         | -0.71 (-4.57 to 3.15)   | -0.50 (-2.13 to 1.13)         | <b>Quetiapine</b>             | NA                      | NA                    | -0.99 (-5.14 to 3.16)         | NA                    | <b>-3.11 (-5.60 to -0.62)</b> | -0.90 (-8.14 to 6.34)         |                               |
| -0.91 (-13.17 to 11.34)       | -0.64 (-12.94 to 11.66)       | -0.42 (-13.22 to 12.39) | -0.20 (-12.35 to 11.95)       | 0.30 (-11.96 to 12.56)        | <b>Levomepromazine</b>  | NA                    | NA                            | NA                    | NA                            | NA                            |                               |
| -2.39 (-5.07 to 0.29)         | -2.11 (-4.39 to 0.17)         | -1.89 (-6.08 to 2.29)   | -1.68 (-4.42 to 1.07)         | -1.18 (-3.64 to 1.29)         | -1.48 (-13.93 to 10.98) | <b>Amisulpride</b>    | NA                            | NA                    | -1.50 (-3.48 to 0.48)         | NA                            |                               |
| <b>-2.49 (-4.33 to -0.65)</b> | <b>-2.21 (-3.33 to -1.10)</b> | -1.99 (-5.58 to 1.60)   | -1.78 (-3.71 to 0.16)         | -1.28 (-2.79 to 0.23)         | -1.58 (-13.88 to 10.73) | -0.10 (-2.27 to 2.06) | <b>Risperidone</b>            | -0.60 (-2.23 to 1.03) | <b>-1.26 (-2.28 to -0.24)</b> | <b>-1.86 (-3.06 to -0.66)</b> |                               |
| <b>-3.09 (-5.54 to -0.63)</b> | <b>-2.81 (-4.78 to -0.84)</b> | -2.59 (-6.53 to 1.35)   | -2.38 (-4.90 to 0.15)         | -1.88 (-4.10 to 0.34)         | -2.18 (-14.59 to 10.23) | -0.70 (-3.41 to 2.00) | -0.60 (-2.23 to 1.03)         | <b>Sertindole</b>     | NA                            | NA                            |                               |
| <b>-3.89 (-5.70 to -2.08)</b> | <b>-3.61 (-4.73 to -2.49)</b> | -3.39 (-7.08 to 0.29)   | <b>-3.18 (-5.08 to -1.27)</b> | <b>-2.68 (-4.14 to -1.21)</b> | -2.98 (-15.28 to 9.32)  | -1.50 (-3.48 to 0.48) | <b>-1.40 (-2.27 to -0.53)</b> | -0.80 (-2.64 to 1.05) | <b>Olanzapine</b>             | 0.20 (-0.83 to 1.22)          |                               |
| <b>-3.91 (-5.58 to -2.24)</b> | <b>-3.63 (-4.70 to -2.57)</b> | -3.41 (-7.11 to 0.28)   | <b>-3.20 (-5.04 to -1.36)</b> | <b>-2.70 (-4.17 to -1.23)</b> | -3.00 (-15.29 to 9.29)  | -1.52 (-3.68 to 0.64) | <b>-1.42 (-2.34 to -0.50)</b> | -0.82 (-2.69 to 1.05) | -0.02 (-0.88 to 0.84)         | <b>Clozapine</b>              |                               |

Treatments are presented in order of efficacy ranking. Results of the network meta-analysis are reported in the left lower half and results of pairwise meta-analyses in the right upper half. Each cell provides the effect estimate and the corresponding 95% credible interval (95% CI) of a comparison (left lower half: treatment in column versus treatment in row; right upper half: treatment in row versus treatment in column). The type of effect size measure is mean difference (MD). Bold results indicate 95% CI excluding no effect. NA=not available.

## Forest plot of results of pairwise meta-analyses

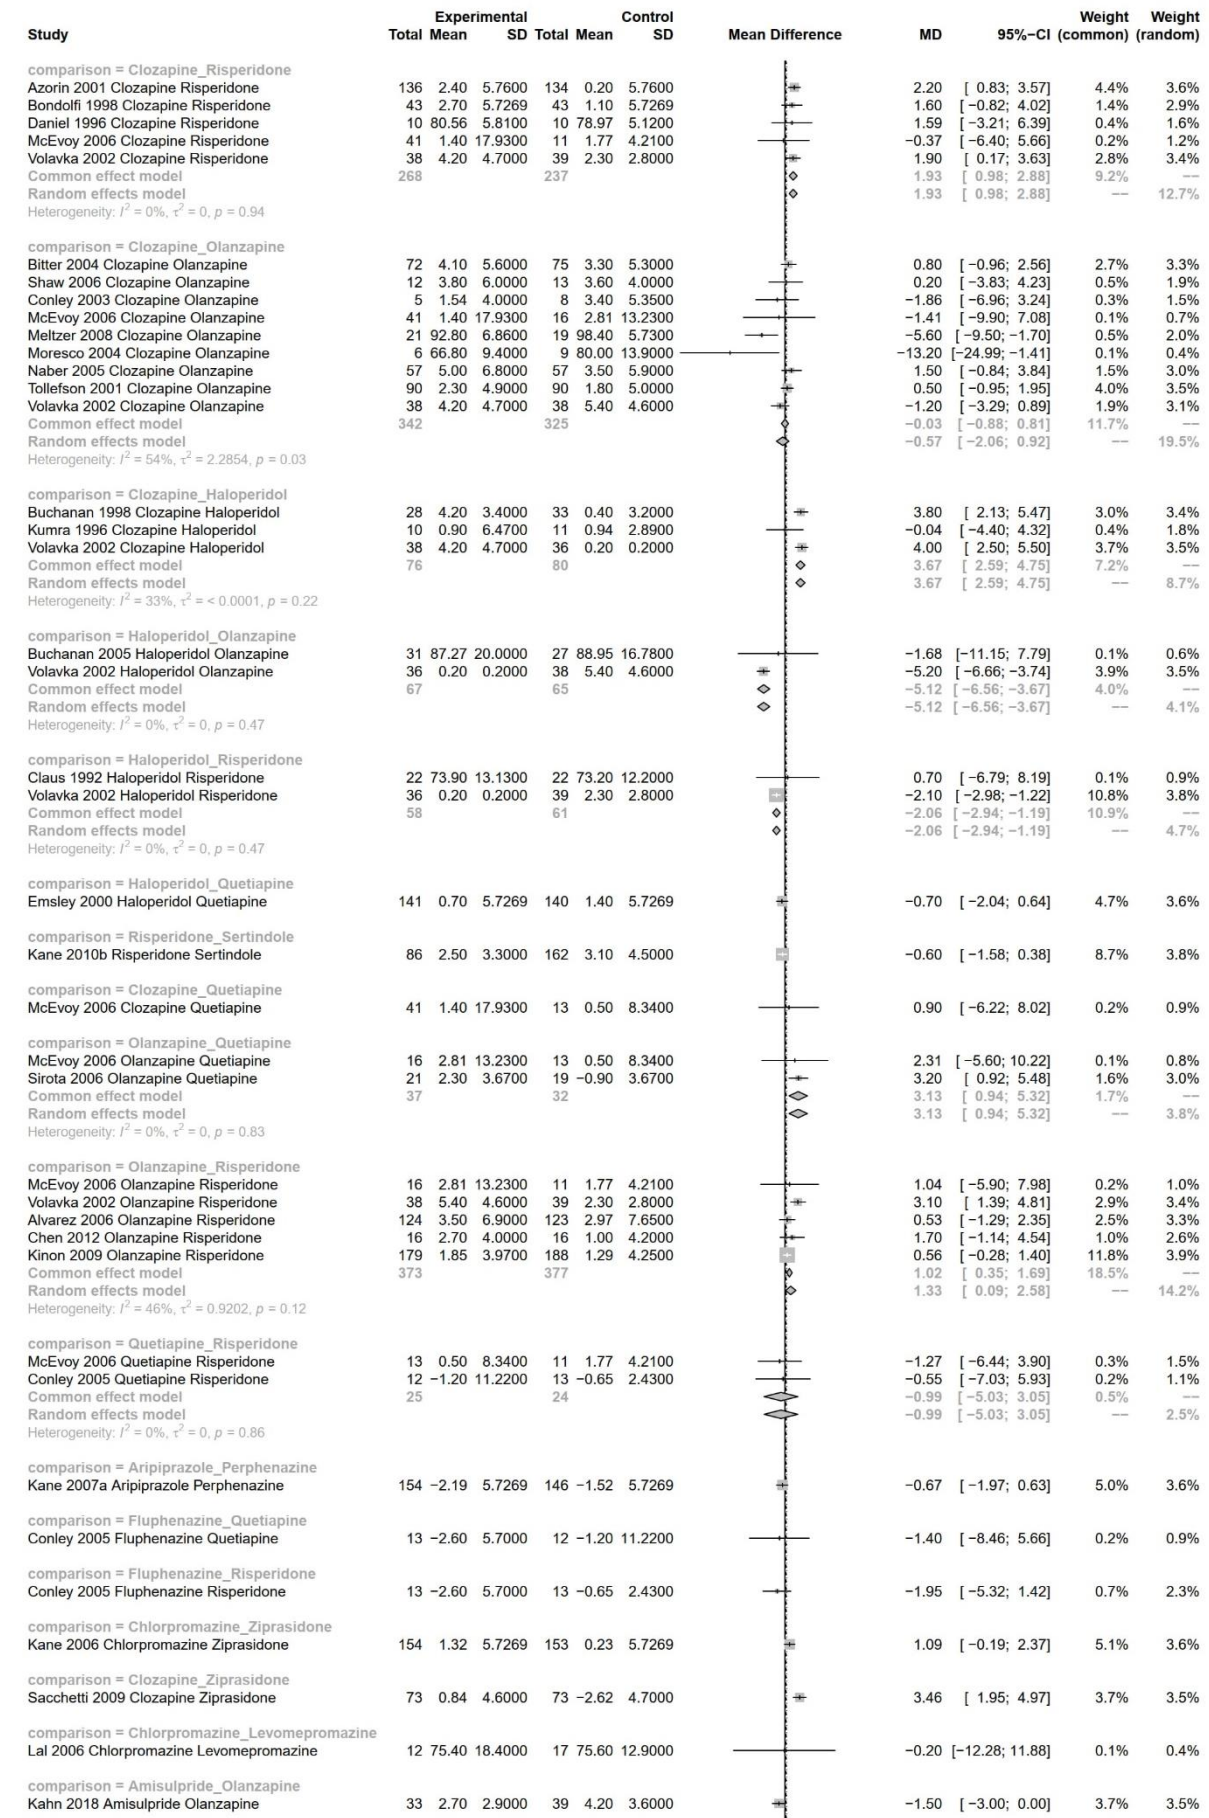

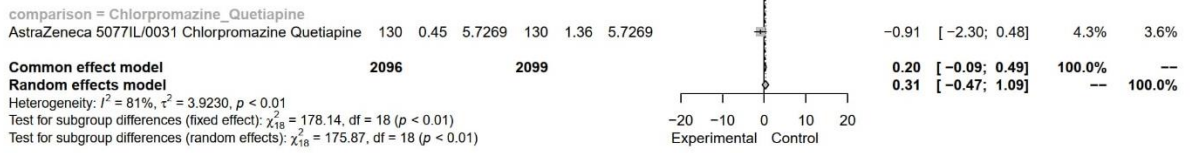

*A summary effect size is calculated by pairwise meta-analyses of all studies of a specific comparison. The type of effect size measure is mean difference (MD).*

## 8.11 QTc prolongation

### Forest plot of results of pairwise meta-analyses

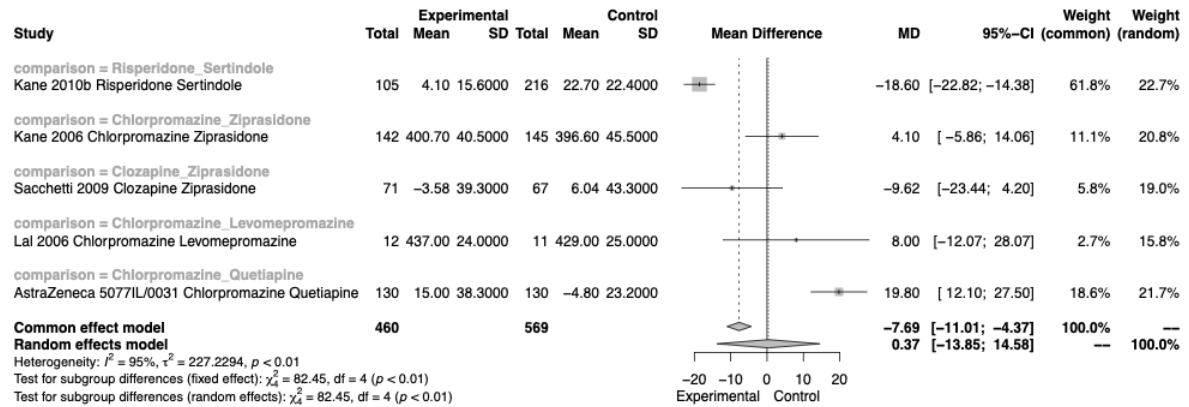

A summary effect size is calculated by pairwise meta-analyses of all studies of a specific comparison. The type of effect size measure is mean difference (MD).

# 8.12 Functioning

## Network plot

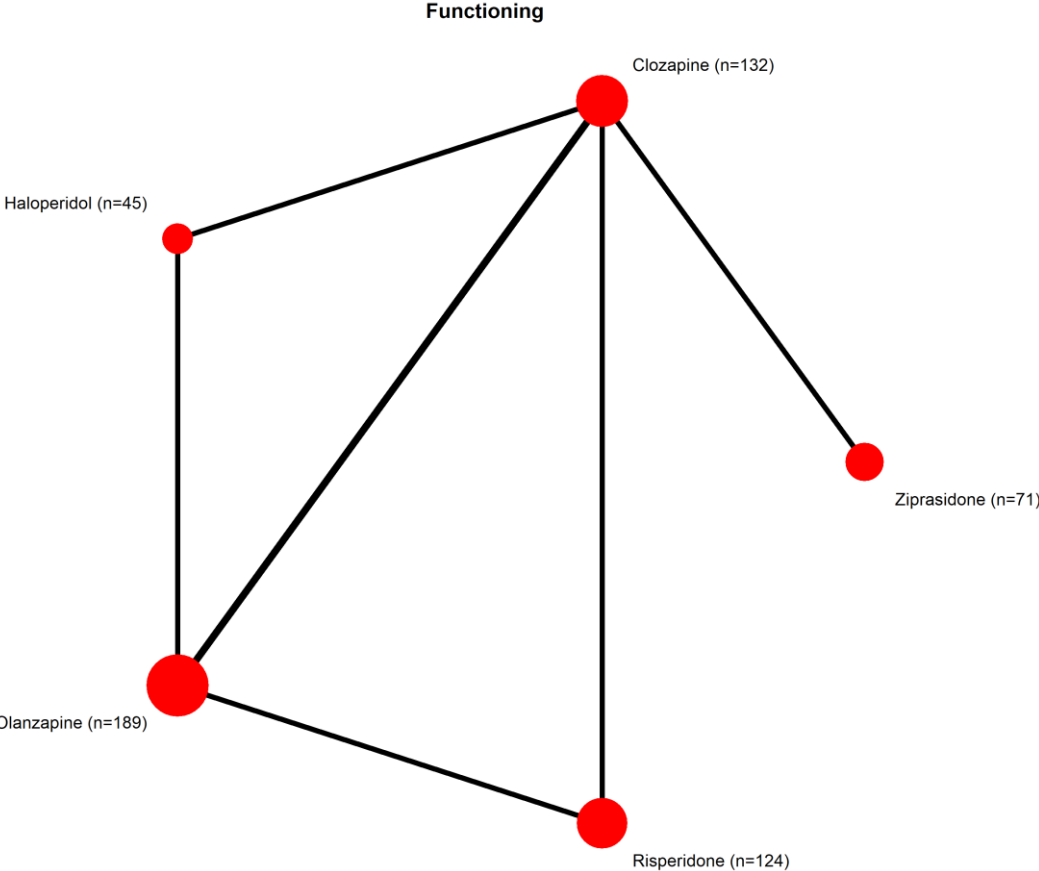

*Lines link treatments with direct comparisons in trials; thickness of lines corresponds to the number of trials evaluating the comparison; size of the nodes corresponds to the number of participants assigned to the treatment.*



**Forest-plot of results of network meta-analysis for antipsychotic drugs versus clozapine**

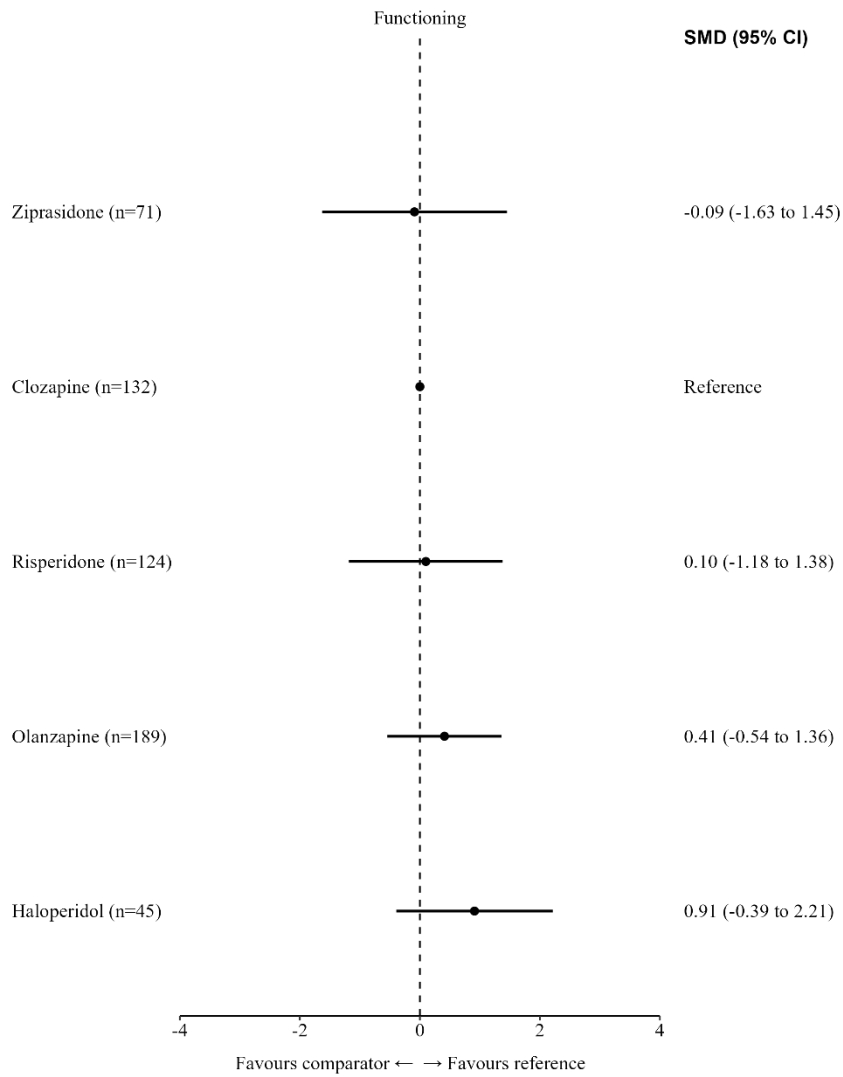

*Effect sizes, measured as standardized mean difference (SMD), are from the network meta-analysis. Order of treatments is according to the mean effect size. Reference is clozapine. The direction of the effect is indicated below the x-axis.*

**League table for the outcome: Functioning**

|                       |                       |                       |                       |                       |
|-----------------------|-----------------------|-----------------------|-----------------------|-----------------------|
| <b>Clozapine</b>      | 0.09 (-1.45 to 1.63)  | 0.85 (-0.92 to 2.63)  | -0.55 (-1.70 to 0.61) | -1.55 (-3.35 to 0.24) |
| 0.09 (-1.45 to 1.63)  | <b>Ziprasidone</b>    | NA                    | NA                    | NA                    |
| -0.10 (-1.38 to 1.18) | -0.19 (-2.19 to 1.82) | <b>Risperidone</b>    | 0.39 (-1.13 to 1.92)  | NA                    |
| -0.41 (-1.36 to 0.54) | -0.50 (-2.31 to 1.31) | -0.31 (-1.54 to 0.92) | <b>Olanzapine</b>     | -0.00 (-1.59 to 1.59) |
| -0.91 (-2.21 to 0.39) | -1.00 (-3.02 to 1.02) | -0.81 (-2.47 to 0.85) | -0.50 (-1.76 to 0.76) | <b>Haloperidol</b>    |

*Treatments are presented in order of efficacy ranking. Results of the network meta-analysis are reported in the left lower half and results of pairwise meta-analyses in the right upper half. Each cell provides the effect estimate and the corresponding 95% credible interval (95% CI) of a comparison (left lower half: treatment in column versus treatment in row; right upper half: treatment in row versus treatment in column). The type of effect size measure is standardized mean difference (SMD). Bold results indicate 95% CI excluding no effect. NA=not available.*

### Forest plot of results of pairwise meta-analyses

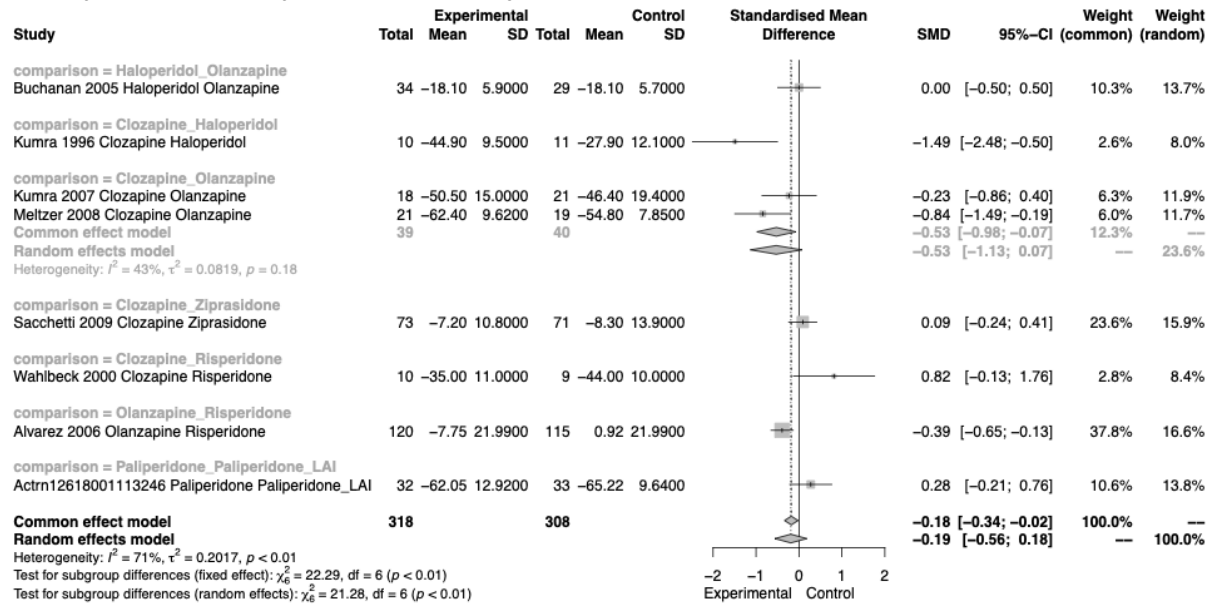

A summary effect size is calculated by pairwise meta-analyses of all studies of a specific comparison. The type of effect size measure is standardized mean difference (SMD).

## 8.13 Quality of life

### Forest plot of results of pairwise meta-analyses

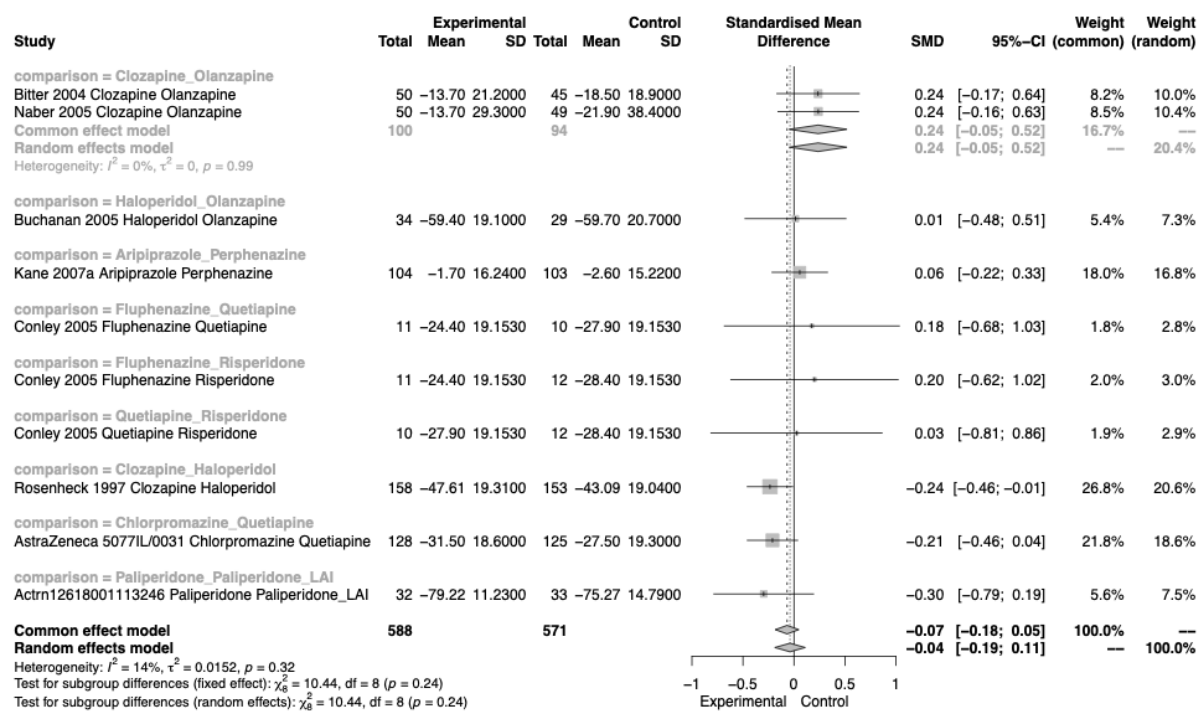

A summary effect size is calculated by pairwise meta-analyses of all studies of a specific comparison. The type of effect size measure is standardized mean difference (SMD).

## 9 Evaluation of heterogeneity

| Outcome                                 | Between study variance (tau) | Outcome type used as comparator                                                    | Predictive distribution of tau | Location of the estimated common tau compared to the quartiles of the empirical predictive distribution | Judgement on heterogeneity |
|-----------------------------------------|------------------------------|------------------------------------------------------------------------------------|--------------------------------|---------------------------------------------------------------------------------------------------------|----------------------------|
| <b>Continuous</b>                       |                              | <b>from Rhodes et al 2015</b>                                                      |                                | <b>Median (IQR)</b>                                                                                     |                            |
| Overall symptoms (SMD)                  | 0.1804                       | Mental health outcome                                                              | 0.19 (0.09, 0.42)              | Between 25%-and 50%-quantile                                                                            | low-moderate               |
| Positive symptoms (SMD)                 | 0.1840                       | Mental health outcome                                                              | 0.19 (0.09, 0.42)              | Between 25%-and 50%-quantile                                                                            | low-moderate               |
| Negative symptoms (SMD)                 | 0.5014                       | Mental health outcome                                                              | 0.19 (0.09, 0.42)              | Above 75%-quantile                                                                                      | high                       |
| Weight gain (MD)                        | 0.6602                       | General physical health and adverse event and pain and quality of life/functioning | 0.18 (0.07, 0.43)              | Above 75%-quantile                                                                                      | high                       |
| Prolactin (MD)                          | 0                            | General physical health and adverse event and pain and quality of life/functioning | 0.18 (0.07, 0.43)              | Below 25%-quantile                                                                                      | low                        |
| Functioning (SMD)                       | 0.7686                       | Mental health outcome                                                              | 0.19 (0.09, 0.42)              | Above 75%-quantile                                                                                      | high                       |
| Quality of life (SMD)                   | 0                            | Mental health outcome                                                              | 0.19 (0.09, 0.42)              | Below 25%-quantile                                                                                      | low                        |
| <b>Dichotomous</b>                      |                              | <b>from Turner et al 2015</b>                                                      |                                | <b>Median (IQR)</b>                                                                                     |                            |
| Response (OR)                           | 0.3783                       | Mental health indicators                                                           | 0.31 (0.18, 0.53)              | Between 50%-and 75%-quantile                                                                            | moderate-high              |
| Dropout for any reason (OR)             | 0.2674                       | Withdrawals/drop-outs                                                              | 0.2 (0.11, 0.36)               | Between 50%-and 75%-quantile                                                                            | moderate-high              |
| Dropout for inefficacy (OR)             | 0.0951                       | Withdrawals/drop-outs                                                              | 0.2 (0.11, 0.36)               | Below 25%-quantile                                                                                      | low                        |
| Dropout for adverse events (OR)         | 0                            | Withdrawals/drop-outs                                                              | 0.2 (0.11, 0.36)               | Below 25%-quantile                                                                                      | low                        |
| Use of antiparkinsonian medication (OR) | 0.2990                       | Adverse events                                                                     | 0.35 (0.21, 0.6)               | Between 50%-and 75%-quantile                                                                            | moderate-high              |
| Sedation (OR)                           | 0                            | Adverse events                                                                     | 0.35 (0.21, 0.6)               | Below 25%-quantile                                                                                      | low                        |

## 10 Evaluation of inconsistency

| Outcome                            | Number of studies (comparisons) [interventions] | P value of design-by-treatment interaction test | Inconsistent comparisons of detachable comparisons (%) (SIDE-test $p < 0.10$ ) | Judgement                           |
|------------------------------------|-------------------------------------------------|-------------------------------------------------|--------------------------------------------------------------------------------|-------------------------------------|
| <b>Continuous</b>                  |                                                 |                                                 |                                                                                |                                     |
| Overall symptoms                   | 45 (57) [12]                                    | < 0.0001                                        | 2 / 18 (11.11%)                                                                | Important evidence of inconsistency |
| Positive symptoms                  | 39 (51) [11]                                    | 0.4937                                          | 2 / 17 (11.76%)                                                                | Little evidence of inconsistency    |
| Negative symptoms                  | 42 (54) [12]                                    | 0.7478                                          | 1 / 18 (5.56%)                                                                 | Little evidence of inconsistency    |
| Weight gain                        | 28 (40) [11]                                    | 0.9701                                          | 1 / 15 (6.67%)                                                                 | Little evidence of inconsistency    |
| Prolactin                          | 10 (17) [8]                                     | 0.4395                                          | 2 / 13 (15.38%)                                                                | Little evidence of inconsistency    |
| QTc prolongation                   | 5 (5) [7]                                       | No closed loops                                 | No closed loops                                                                | Inconsistency not estimable         |
| Functioning                        | 7 (7) [5]                                       | 0.0097                                          | 0 / 5 (0%)                                                                     | Some evidence of inconsistency      |
| Quality of life                    | 8 (9) [11]                                      | No closed loops                                 | No closed loops                                                                | Inconsistency not estimable         |
| <b>Dichotomous</b>                 |                                                 |                                                 |                                                                                |                                     |
| Response                           | 46 (66) [20]                                    | 0.0194                                          | 4 / 31 (12.90%)                                                                | Important evidence of inconsistency |
| Dropout for any reason             | 54 (75) [18]                                    | 0.9155                                          | 1 / 27 (3.70%)                                                                 | Little evidence of inconsistency    |
| Dropout for inefficacy             | 48 (67) [17]                                    | 0.7432                                          | 2 / 26 (7.69%)                                                                 | Little evidence of inconsistency    |
| Dropout for adverse events         | 50 (71) [19]                                    | 0.8684                                          | 0 / 29 (0%)                                                                    | No evidence of inconsistency        |
| Use of antiparkinsonian medication | 24 (35) [16]                                    | 0.7994                                          | 0 / 14 (0%)                                                                    | No evidence of inconsistency        |
| Sedation                           | 30 (44) [16]                                    | 0.5939                                          | 1 / 24 (4.17%)                                                                 | Little evidence of inconsistency    |

# 11 Results of the sensitivity analyses of the primary outcome

## 11.1 Excluding 3 old clozapine-chlorpromazine studies

Number of studies:  $k = 42$

Number of pairwise comparisons:  $m = 54$

Number of treatments:  $n = 12$

Number of designs:  $d = 20$

### Network plot

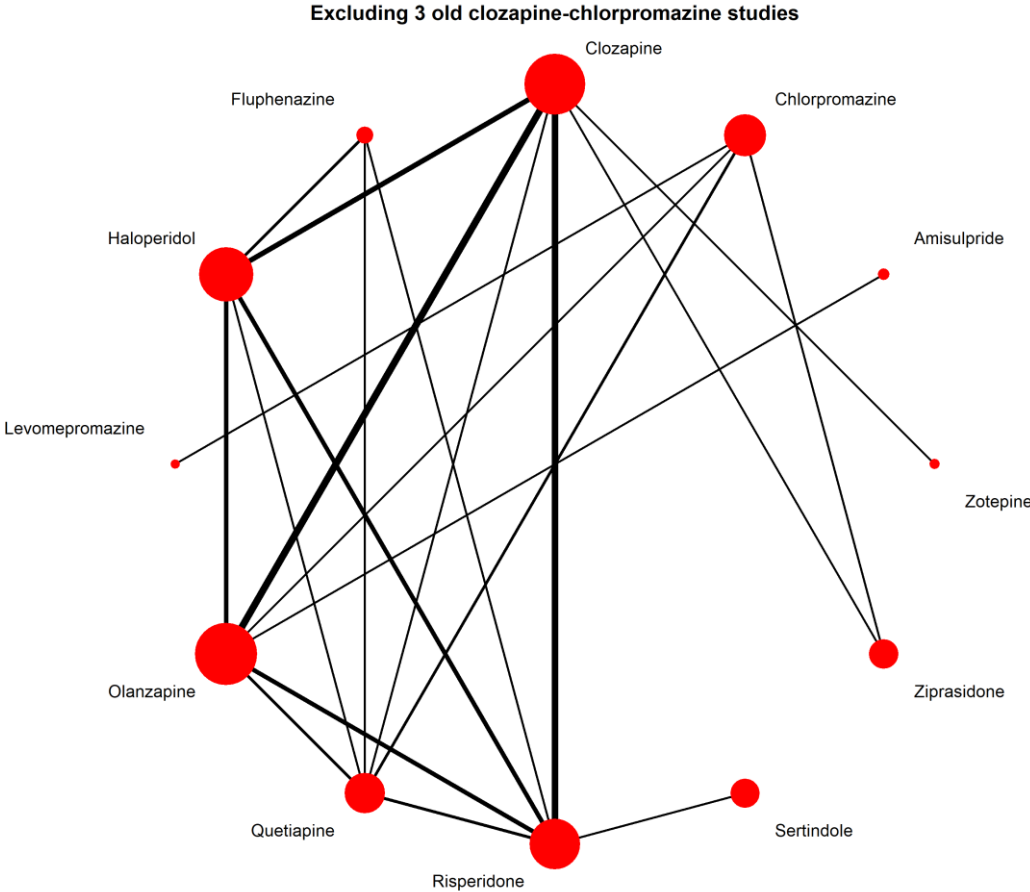

*Lines link treatments with direct comparisons in trials; thickness of lines corresponds to the number of trials evaluating the comparison; size of the nodes corresponds to the number of participants assigned to the treatment.*

| $\tau$ | P-value | Inconsistency loop (%) |
|--------|---------|------------------------|
| 0.0325 | 0.2979  | 5.88                   |

**Forest-plot of results of network meta-analysis for antipsychotic drugs versus clozapine**

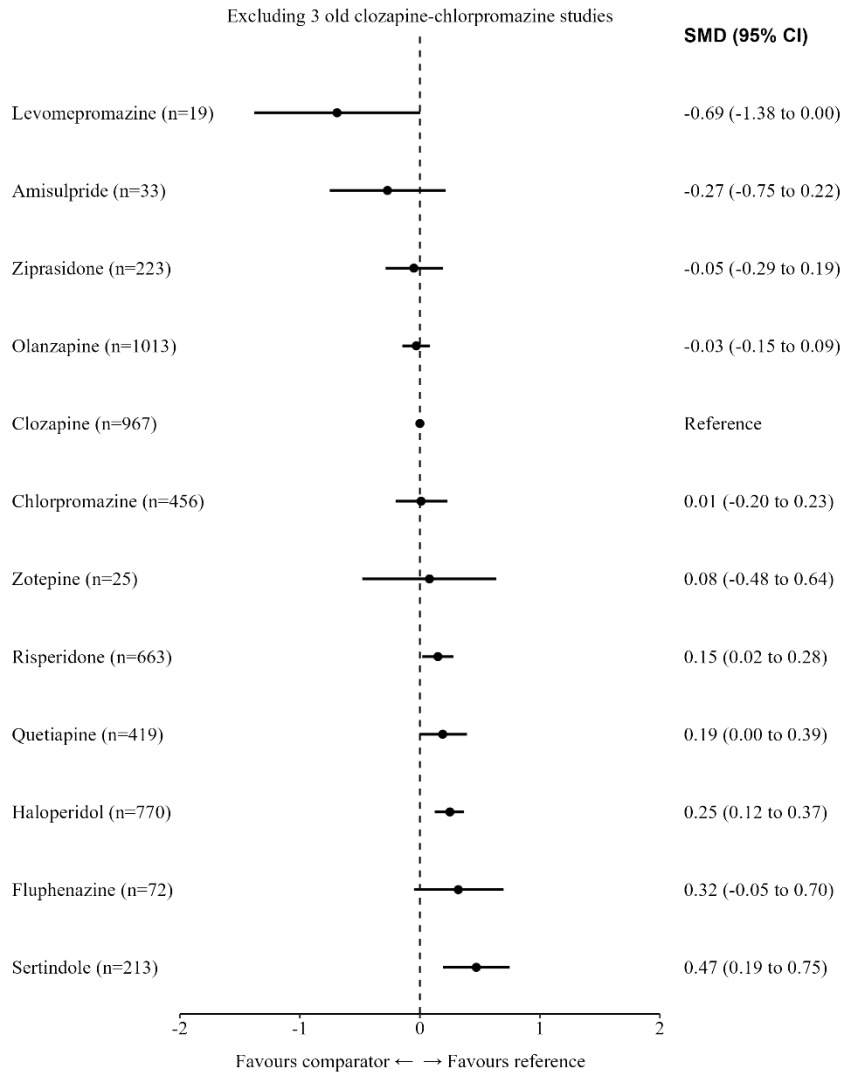

Effect sizes, measured as standardized mean difference (SMD), are from the network meta-analysis. Order of treatments is according to the mean effect size. Reference is clozapine. The direction of the effect is indicated below the x-axis.



**League table**

|                               |                               |                               |                               |                               |                               |                       |                               |                               |                               |                       |                               |
|-------------------------------|-------------------------------|-------------------------------|-------------------------------|-------------------------------|-------------------------------|-----------------------|-------------------------------|-------------------------------|-------------------------------|-----------------------|-------------------------------|
| <b>Levomepromazine</b>        | NA                            | NA                            | NA                            | NA                            | <b>-0.70 (-1.36 to -0.04)</b> | NA                    | NA                            | NA                            | NA                            | NA                    | NA                            |
| -0.42 (-1.26 to 0.42)         | <b>Amisulpride</b>            | NA                            | -0.24 (-0.71 to 0.23)         | NA                            | NA                            | NA                    | NA                            | NA                            | NA                            | NA                    | NA                            |
| -0.64 (-1.33 to 0.05)         | -0.22 (-0.75 to 0.31)         | <b>Ziprasidone</b>            | NA                            | -0.02 (-0.36 to 0.31)         | -0.07 (-0.30 to 0.16)         | NA                    | NA                            | NA                            | NA                            | NA                    | NA                            |
| -0.66 (-1.35 to 0.03)         | -0.24 (-0.71 to 0.23)         | -0.02 (-0.26 to 0.23)         | <b>Olanzapine</b>             | -0.03 (-0.18 to 0.13)         | -0.22 (-0.66 to 0.23)         | NA                    | <b>-0.23 (-0.41 to -0.05)</b> | -0.05 (-0.57 to 0.47)         | <b>-0.27 (-0.44 to -0.11)</b> | NA                    | NA                            |
| -0.69 (-1.38 to 0.00)         | -0.27 (-0.75 to 0.22)         | -0.05 (-0.29 to 0.19)         | -0.03 (-0.15 to 0.09)         | <b>Clozapine</b>              | NA                            | -0.08 (-0.64 to 0.48) | -0.11 (-0.28 to 0.05)         | <b>-1.01 (-1.81 to -0.21)</b> | <b>-0.19 (-0.35 to -0.03)</b> | NA                    | NA                            |
| <b>-0.70 (-1.36 to -0.04)</b> | -0.28 (-0.80 to 0.24)         | -0.06 (-0.26 to 0.14)         | -0.04 (-0.26 to 0.17)         | -0.01 (-0.23 to 0.20)         | <b>Chlorpromazine</b>         | NA                    | NA                            | <b>-0.22 (-0.40 to -0.03)</b> | NA                            | NA                    | NA                            |
| -0.77 (-1.66 to 0.12)         | -0.35 (-1.08 to 0.39)         | -0.12 (-0.73 to 0.48)         | -0.11 (-0.68 to 0.46)         | -0.08 (-0.64 to 0.48)         | -0.06 (-0.66 to 0.53)         | <b>Zotepine</b>       | NA                            | NA                            | NA                            | NA                    | NA                            |
| <b>-0.84 (-1.54 to -0.14)</b> | -0.42 (-0.91 to 0.07)         | -0.20 (-0.46 to 0.07)         | <b>-0.18 (-0.32 to -0.05)</b> | <b>-0.15 (-0.28 to -0.02)</b> | -0.14 (-0.37 to 0.10)         | -0.07 (-0.65 to 0.50) | <b>Risperidone</b>            | -0.06 (-0.69 to 0.57)         | -0.14 (-0.42 to 0.14)         | 0.02 (-0.75 to 0.79)  | <b>-0.32 (-0.57 to -0.07)</b> |
| <b>-0.88 (-1.56 to -0.20)</b> | -0.46 (-0.97 to 0.05)         | -0.24 (-0.48 to 0.00)         | <b>-0.22 (-0.42 to -0.03)</b> | -0.19 (-0.39 to 0.00)         | <b>-0.18 (-0.35 to -0.02)</b> | -0.12 (-0.71 to 0.48) | -0.04 (-0.26 to 0.17)         | <b>Quetiapine</b>             | -0.14 (-0.38 to 0.10)         | 0.15 (-0.64 to 0.93)  | NA                            |
| <b>-0.93 (-1.63 to -0.24)</b> | <b>-0.51 (-1.00 to -0.03)</b> | <b>-0.29 (-0.54 to -0.04)</b> | <b>-0.28 (-0.40 to -0.15)</b> | <b>-0.25 (-0.37 to -0.12)</b> | <b>-0.23 (-0.44 to -0.02)</b> | -0.17 (-0.74 to 0.40) | -0.10 (-0.24 to 0.05)         | -0.05 (-0.24 to 0.13)         | <b>Haloperidol</b>            | -0.17 (-0.59 to 0.25) | NA                            |
| <b>-1.01 (-1.79 to -0.24)</b> | -0.59 (-1.19 to 0.01)         | -0.37 (-0.80 to 0.06)         | -0.35 (-0.73 to 0.02)         | -0.32 (-0.70 to 0.05)         | -0.31 (-0.72 to 0.10)         | -0.25 (-0.92 to 0.43) | -0.17 (-0.55 to 0.21)         | -0.13 (-0.52 to 0.26)         | -0.08 (-0.44 to 0.28)         | <b>Fluphenazine</b>   | NA                            |
| <b>-1.16 (-1.90 to -0.42)</b> | <b>-0.74 (-1.28 to -0.19)</b> | <b>-0.52 (-0.88 to -0.16)</b> | <b>-0.50 (-0.78 to -0.22)</b> | <b>-0.47 (-0.75 to -0.19)</b> | <b>-0.46 (-0.80 to -0.12)</b> | -0.39 (-1.02 to 0.23) | <b>-0.32 (-0.57 to -0.07)</b> | -0.28 (-0.60 to 0.05)         | -0.23 (-0.51 to 0.06)         | -0.15 (-0.60 to 0.30) | <b>Sertindole</b>             |

Treatments are presented in order of efficacy ranking. Results of the network meta-analysis are reported in the left lower half and results of pairwise meta-analyses in the right upper half. Each cell provides the effect estimate and the corresponding 95% credible interval (95% CI) of a comparison (left lower half: treatment in column versus treatment in row; right upper half: treatment in row versus treatment in column). The type of effect size measure is standardized mean difference (SMD). Bold results indicate 95% CI excluding no effect. NA=not available.

## 11.2 Excluding studies that included intolerant patients

Number of studies:  $k = 35$

Number of pairwise comparisons:  $m = 47$

Number of treatments:  $n = 11$

Number of designs:  $d = 19$

### Network plot

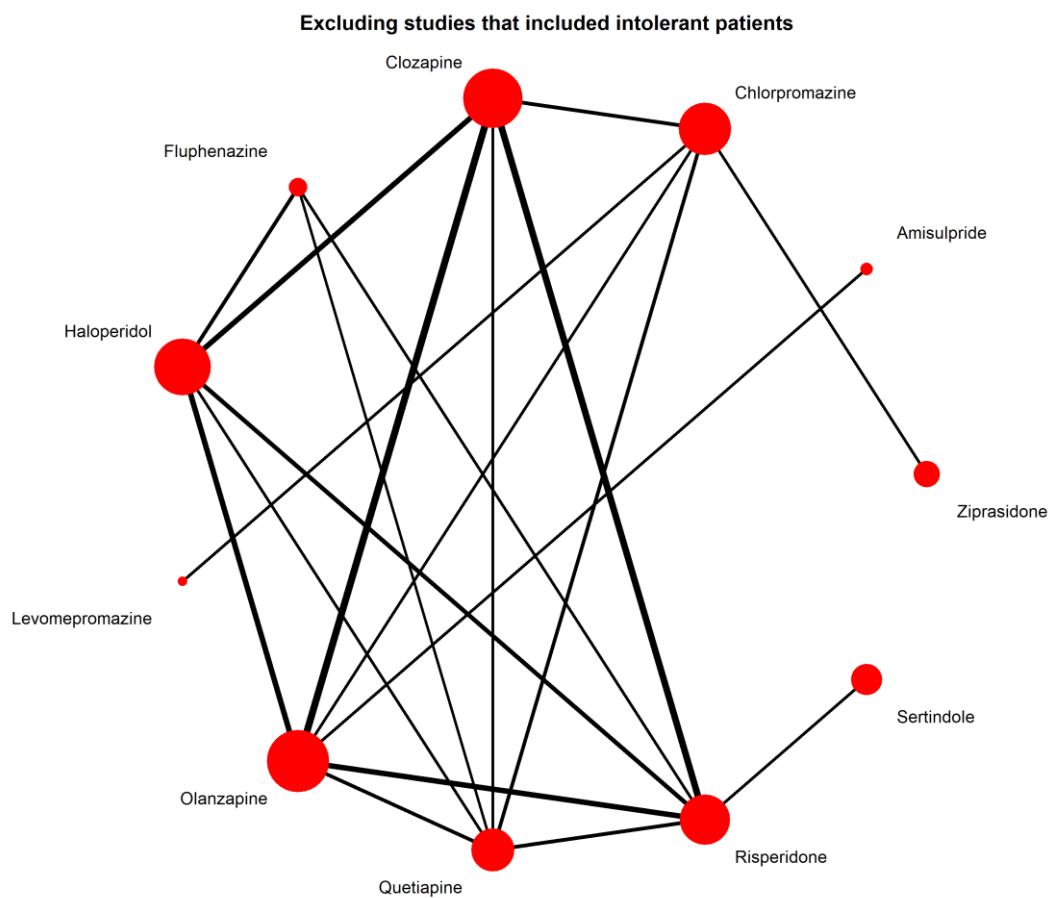

*Lines link treatments with direct comparisons in trials; thickness of lines corresponds to the number of trials evaluating the comparison; size of the nodes corresponds to the number of participants assigned to the treatment.*

| $\tau$ | P-value | Inconsistency loop (%) |
|--------|---------|------------------------|
| 0.2007 | 0.0002  | 18.75                  |

**Forest-plot of results of network meta-analysis for antipsychotic drugs versus clozapine**

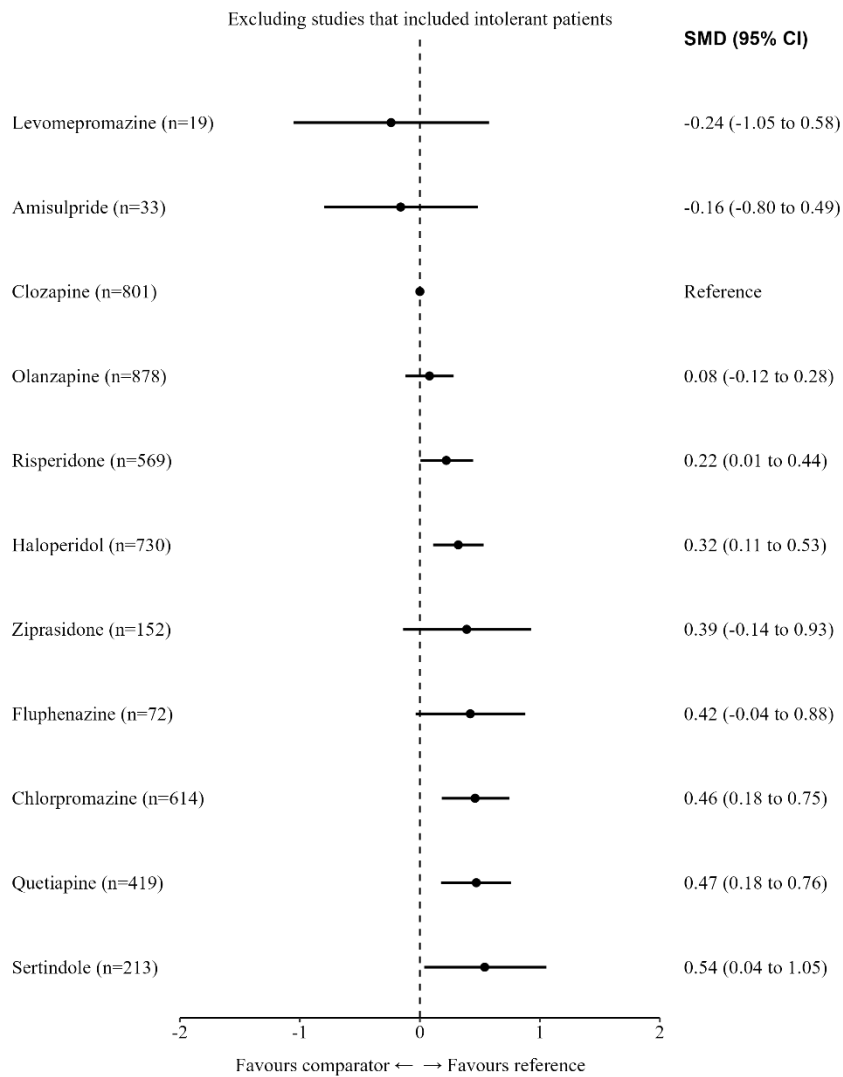

*Effect sizes, measured as standardized mean difference (SMD), are from the network meta-analysis. Order of treatments is according to the mean effect size. Reference is clozapine. The direction of the effect is indicated below the x-axis.*

### League table

|                       |                       |                               |                               |                       |                       |                       |                       |                               |                               |                       |    |
|-----------------------|-----------------------|-------------------------------|-------------------------------|-----------------------|-----------------------|-----------------------|-----------------------|-------------------------------|-------------------------------|-----------------------|----|
| Levomepromazine       | NA                    | NA                            | NA                            | NA                    | NA                    | NA                    | NA                    | NA                            | -0.70 (-1.47 to 0.06)         | NA                    | NA |
| -0.08 (-1.10 to 0.94) | Amisulpride           | NA                            | -0.24 (-0.85 to 0.37)         | NA                    | NA                    | NA                    | NA                    | NA                            | NA                            | NA                    | NA |
| -0.24 (-1.05 to 0.58) | -0.16 (-0.80 to 0.49) | Clozapine                     | -0.01 (-0.28 to 0.26)         | -0.14 (-0.42 to 0.13) | -0.13 (-0.42 to 0.15) | NA                    | NA                    | <b>-0.85 (-1.24 to -0.45)</b> | <b>-1.01 (-1.90 to -0.12)</b> | NA                    | NA |
| -0.32 (-1.14 to 0.50) | -0.24 (-0.85 to 0.37) | -0.08 (-0.28 to 0.12)         | Olanzapine                    | -0.23 (-0.55 to 0.08) | -0.28 (-0.58 to 0.01) | NA                    | NA                    | -0.22 (-0.80 to 0.37)         | -0.07 (-0.66 to 0.53)         | NA                    | NA |
| -0.46 (-1.29 to 0.37) | -0.38 (-1.03 to 0.27) | <b>-0.22 (-0.44 to -0.01)</b> | -0.14 (-0.37 to 0.09)         | Risperidone           | -0.15 (-0.56 to 0.27) | NA                    | 0.02 (-0.84 to 0.89)  | NA                            | -0.06 (-0.75 to 0.64)         | -0.32 (-0.78 to 0.14) | NA |
| -0.56 (-1.38 to 0.27) | -0.48 (-1.12 to 0.17) | <b>-0.32 (-0.53 to -0.11)</b> | <b>-0.24 (-0.46 to -0.03)</b> | -0.10 (-0.34 to 0.15) | Haloperidol           | NA                    | -0.17 (-0.68 to 0.33) | NA                            | 0.14 (-0.32 to 0.60)          | NA                    | NA |
| -0.63 (-1.52 to 0.26) | -0.55 (-1.36 to 0.27) | -0.39 (-0.93 to 0.14)         | -0.31 (-0.85 to 0.23)         | -0.17 (-0.73 to 0.39) | -0.07 (-0.62 to 0.47) | Ziprasidone           | NA                    | -0.07 (-0.52 to 0.38)         | NA                            | NA                    | NA |
| -0.66 (-1.57 to 0.25) | -0.58 (-1.34 to 0.18) | -0.42 (-0.88 to 0.04)         | -0.34 (-0.80 to 0.12)         | -0.20 (-0.66 to 0.27) | -0.10 (-0.53 to 0.32) | -0.03 (-0.70 to 0.65) | Fluphenazine          | NA                            | -0.15 (-1.02 to 0.73)         | NA                    | NA |
| -0.70 (-1.47 to 0.06) | -0.62 (-1.30 to 0.06) | <b>-0.46 (-0.75 to -0.18)</b> | <b>-0.38 (-0.68 to -0.09)</b> | -0.24 (-0.57 to 0.09) | -0.14 (-0.45 to 0.16) | -0.07 (-0.52 to 0.38) | -0.04 (-0.54 to 0.46) | Chlorpromazine                | -0.22 (-0.55 to 0.12)         | NA                    | NA |
| -0.71 (-1.52 to 0.11) | -0.62 (-1.30 to 0.05) | <b>-0.47 (-0.76 to -0.18)</b> | <b>-0.39 (-0.68 to -0.09)</b> | -0.24 (-0.57 to 0.08) | -0.15 (-0.44 to 0.14) | -0.07 (-0.60 to 0.45) | -0.05 (-0.53 to 0.44) | -0.00 (-0.28 to 0.27)         | Quetiapine                    | NA                    | NA |
| -0.78 (-1.73 to 0.17) | -0.70 (-1.50 to 0.10) | <b>-0.54 (-1.05 to -0.04)</b> | -0.46 (-0.98 to 0.05)         | -0.32 (-0.78 to 0.14) | -0.22 (-0.75 to 0.30) | -0.15 (-0.87 to 0.57) | -0.12 (-0.78 to 0.53) | -0.08 (-0.64 to 0.48)         | -0.08 (-0.64 to 0.48)         | Sertindole            | NA |

Treatments are presented in order of efficacy ranking. Results of the network meta-analysis are reported in the left lower half and results of pairwise meta-analyses in the right upper half. Each cell provides the effect estimate and the corresponding 95% credible interval (95% CI) of a comparison (left lower half: treatment in column versus treatment in row; right upper half: treatment in row versus treatment in column). The type of effect size measure is standardized mean difference (SMD). Bold results indicate 95% CI excluding no effect. NA=not available.

### 11.3 Double-blind studies only

Number of studies:  $k = 41$

Number of pairwise comparisons:  $m = 53$

Number of treatments:  $n = 12$

Number of designs:  $d = 20$

#### Network plot

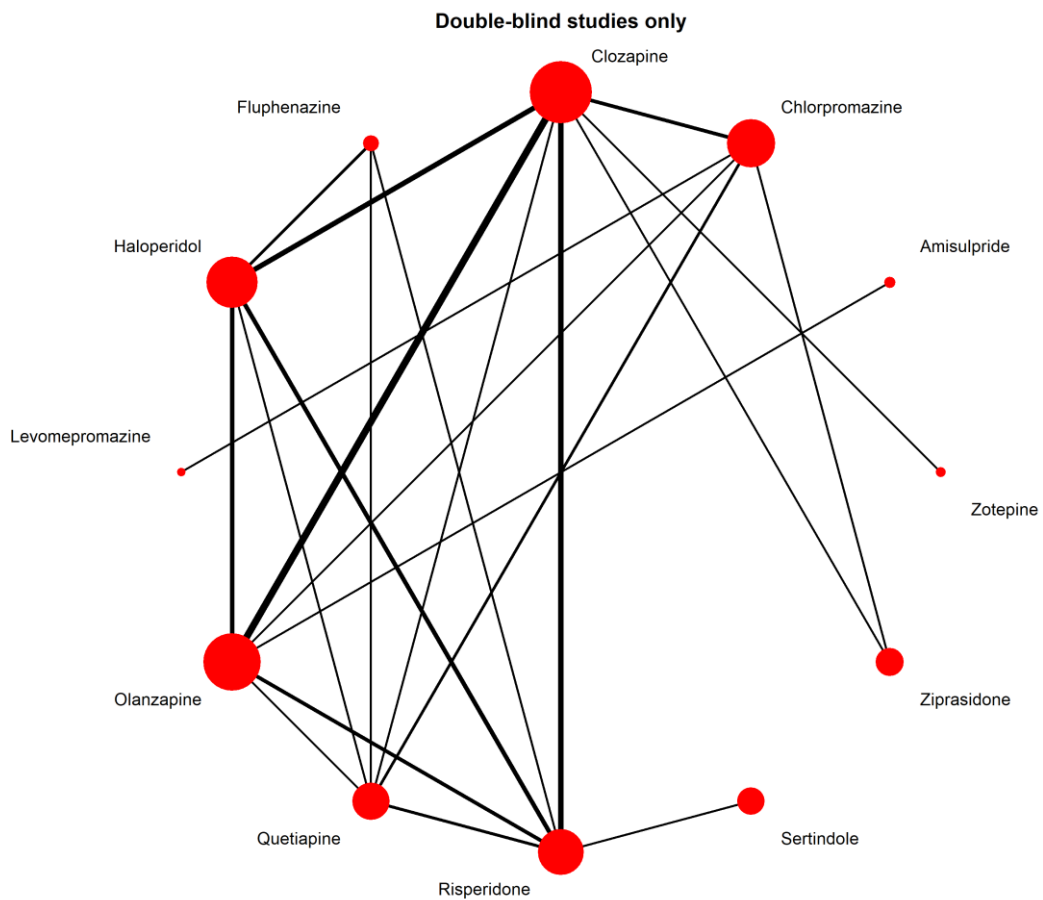

*Lines link treatments with direct comparisons in trials; thickness of lines corresponds to the number of trials evaluating the comparison; size of the nodes corresponds to the number of participants assigned to the treatment.*

| $\tau$ | P-value | Inconsistency loop (%) |
|--------|---------|------------------------|
| 0.1759 | 0.0001  | 16.67                  |

**Forest-plot of results of network meta-analysis for antipsychotic drugs versus clozapine**

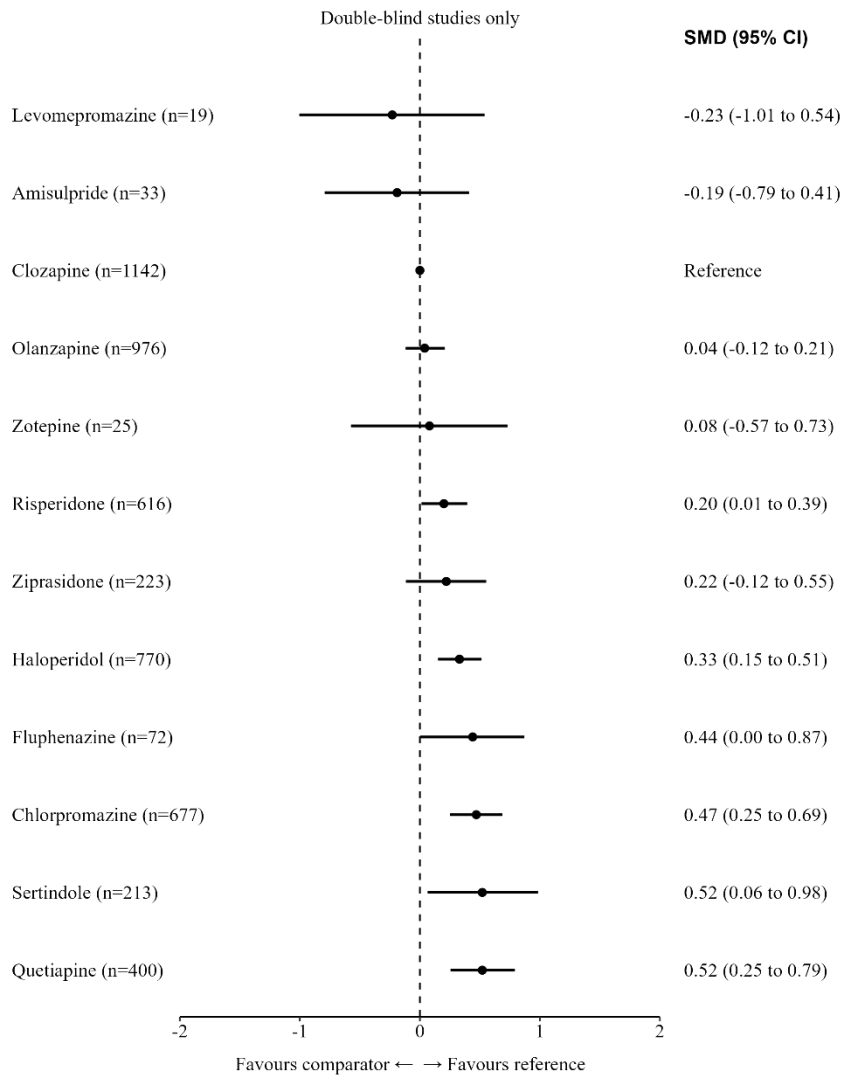

*Effect sizes, measured as standardized mean difference (SMD), are from the network meta-analysis. Order of treatments is according to the mean effect size. Reference is clozapine. The direction of the effect is indicated below the x-axis.*

### League table

|                               |                        |                               |                               |                       |                               |                       |                               |                       |                               |                       |                               |
|-------------------------------|------------------------|-------------------------------|-------------------------------|-----------------------|-------------------------------|-----------------------|-------------------------------|-----------------------|-------------------------------|-----------------------|-------------------------------|
| <b>Amisulpride</b>            | NA                     | NA                            | -0.24 (-0.82 to 0.34)         | NA                    | NA                            | NA                    | NA                            | NA                    | NA                            | NA                    | NA                            |
| 0.04 (-0.93 to 1.01)          | <b>Levomepromazine</b> | NA                            | NA                            | NA                    | NA                            | NA                    | NA                            | NA                    | -0.70 (-1.44 to 0.04)         | NA                    | NA                            |
| -0.19 (-0.79 to 0.41)         | -0.23 (-1.01 to 0.54)  | <b>Clozapine</b>              | -0.01 (-0.21 to 0.19)         | -0.08 (-0.73 to 0.57) | -0.13 (-0.37 to 0.11)         | 0.02 (-0.45 to 0.50)  | -0.18 (-0.44 to 0.07)         | NA                    | <b>-0.78 (-1.07 to -0.48)</b> | NA                    | <b>-1.01 (-1.88 to -0.14)</b> |
| -0.24 (-0.82 to 0.34)         | -0.28 (-1.06 to 0.50)  | -0.04 (-0.21 to 0.12)         | <b>Olanzapine</b>             | NA                    | -0.25 (-0.56 to 0.06)         | NA                    | <b>-0.28 (-0.55 to -0.01)</b> | NA                    | -0.22 (-0.77 to 0.34)         | NA                    | -0.38 (-1.37 to 0.62)         |
| -0.27 (-1.16 to 0.62)         | -0.31 (-1.32 to 0.70)  | -0.08 (-0.73 to 0.57)         | -0.03 (-0.71 to 0.64)         | <b>Zotepine</b>       | NA                            | NA                    | NA                            | NA                    | NA                            | NA                    | NA                            |
| -0.40 (-1.01 to 0.22)         | -0.44 (-1.23 to 0.35)  | <b>-0.20 (-0.39 to -0.01)</b> | -0.16 (-0.37 to 0.05)         | -0.13 (-0.81 to 0.55) | <b>Risperidone</b>            | NA                    | -0.15 (-0.48 to 0.19)         | 0.02 (-0.82 to 0.86)  | NA                            | -0.32 (-0.74 to 0.10) | -0.06 (-0.74 to 0.62)         |
| -0.41 (-1.09 to 0.27)         | -0.45 (-1.26 to 0.36)  | -0.22 (-0.55 to 0.12)         | -0.17 (-0.54 to 0.19)         | -0.14 (-0.87 to 0.59) | -0.01 (-0.39 to 0.36)         | <b>Ziprasidone</b>    | NA                            | NA                    | -0.07 (-0.48 to 0.34)         | NA                    | NA                            |
| -0.52 (-1.14 to 0.09)         | -0.57 (-1.35 to 0.22)  | <b>-0.33 (-0.51 to -0.15)</b> | <b>-0.29 (-0.48 to -0.09)</b> | -0.25 (-0.93 to 0.42) | -0.13 (-0.34 to 0.09)         | -0.11 (-0.48 to 0.26) | <b>Haloperidol</b>            | -0.17 (-0.66 to 0.31) | NA                            | NA                    | 0.14 (-0.27 to 0.56)          |
| -0.63 (-1.36 to 0.10)         | -0.67 (-1.54 to 0.21)  | -0.44 (-0.87 to 0.00)         | -0.39 (-0.83 to 0.05)         | -0.36 (-1.14 to 0.43) | -0.23 (-0.67 to 0.21)         | -0.22 (-0.76 to 0.32) | -0.10 (-0.51 to 0.31)         | <b>Fluphenazine</b>   | NA                            | NA                    | -0.15 (-1.00 to 0.71)         |
| <b>-0.66 (-1.29 to -0.03)</b> | -0.70 (-1.44 to 0.04)  | <b>-0.47 (-0.69 to -0.25)</b> | <b>-0.42 (-0.67 to -0.18)</b> | -0.39 (-1.08 to 0.30) | -0.27 (-0.54 to 0.01)         | -0.25 (-0.58 to 0.07) | -0.14 (-0.39 to 0.12)         | -0.03 (-0.50 to 0.43) | <b>Chlorpromazine</b>         | NA                    | -0.22 (-0.52 to 0.09)         |
| -0.72 (-1.46 to 0.03)         | -0.76 (-1.65 to 0.14)  | <b>-0.52 (-0.98 to -0.06)</b> | <b>-0.48 (-0.95 to -0.01)</b> | -0.45 (-1.25 to 0.35) | -0.32 (-0.74 to 0.10)         | -0.31 (-0.87 to 0.26) | -0.19 (-0.66 to 0.28)         | -0.09 (-0.70 to 0.52) | -0.06 (-0.56 to 0.44)         | <b>Sertindole</b>     | NA                            |
| <b>-0.72 (-1.36 to -0.07)</b> | -0.76 (-1.54 to 0.02)  | <b>-0.52 (-0.79 to -0.25)</b> | <b>-0.48 (-0.77 to -0.19)</b> | -0.45 (-1.15 to 0.26) | <b>-0.32 (-0.62 to -0.02)</b> | -0.31 (-0.69 to 0.08) | -0.19 (-0.46 to 0.08)         | -0.09 (-0.55 to 0.38) | -0.05 (-0.30 to 0.19)         | 0.00 (-0.51 to 0.52)  | <b>Quetiapine</b>             |

Treatments are presented in order of efficacy ranking. Results of the network meta-analysis are reported in the left lower half and results of pairwise meta-analyses in the right upper half. Each cell provides the effect estimate and the corresponding 95% credible interval (95% CI) of a comparison (left lower half: treatment in column versus treatment in row; right upper half: treatment in row versus treatment in column). The type of effect size measure is standardized mean difference (SMD). Bold results indicate 95% CI excluding no effect. NA=not available

## 11.4 Excluding studies that presented only completer analyses

Number of studies:  $k = 37$

Number of pairwise comparisons:  $m = 49$

Number of treatments:  $n = 11$

Number of designs:  $d = 20$

### Network plot

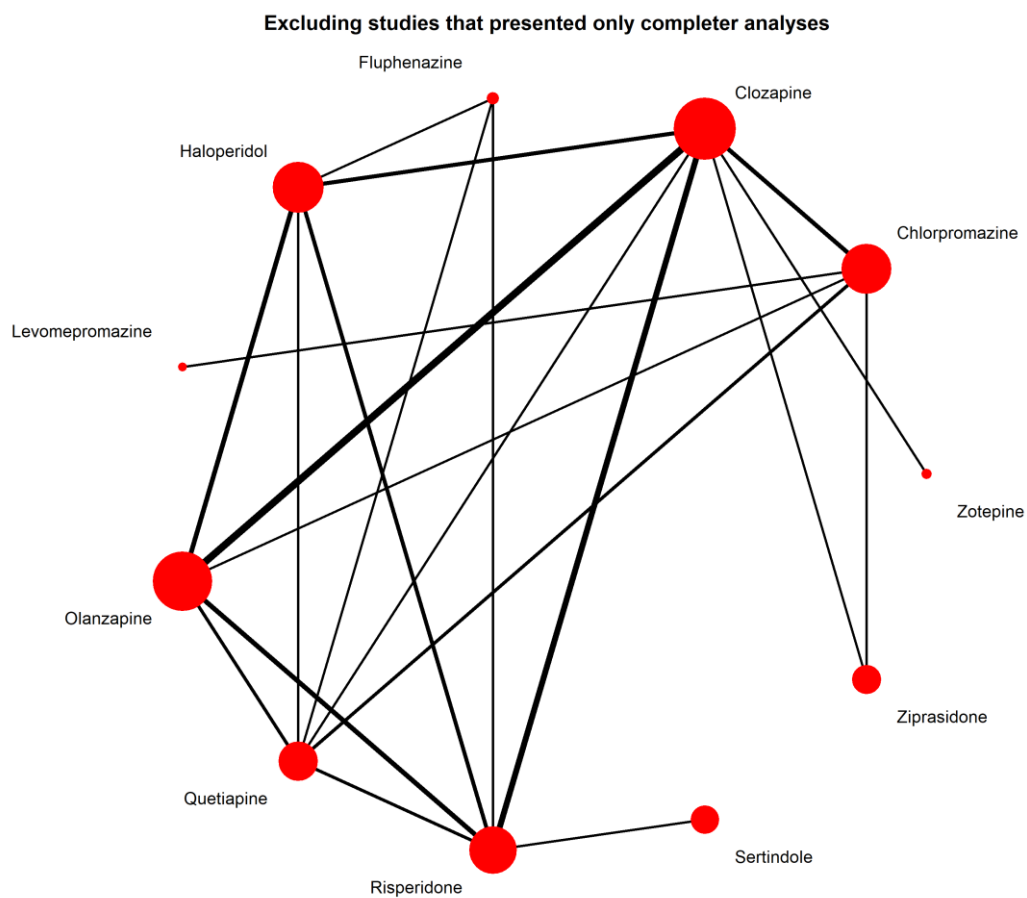

*Lines link treatments with direct comparisons in trials; thickness of lines corresponds to the number of trials evaluating the comparison; size of the nodes corresponds to the number of participants assigned to the treatment.*

| $\tau$ | P-value | Inconsistency loop (%) |
|--------|---------|------------------------|
| 0.1979 | 0.0007  | 11.11                  |



**Forest-plot of results of network meta-analysis for antipsychotic drugs versus clozapine**

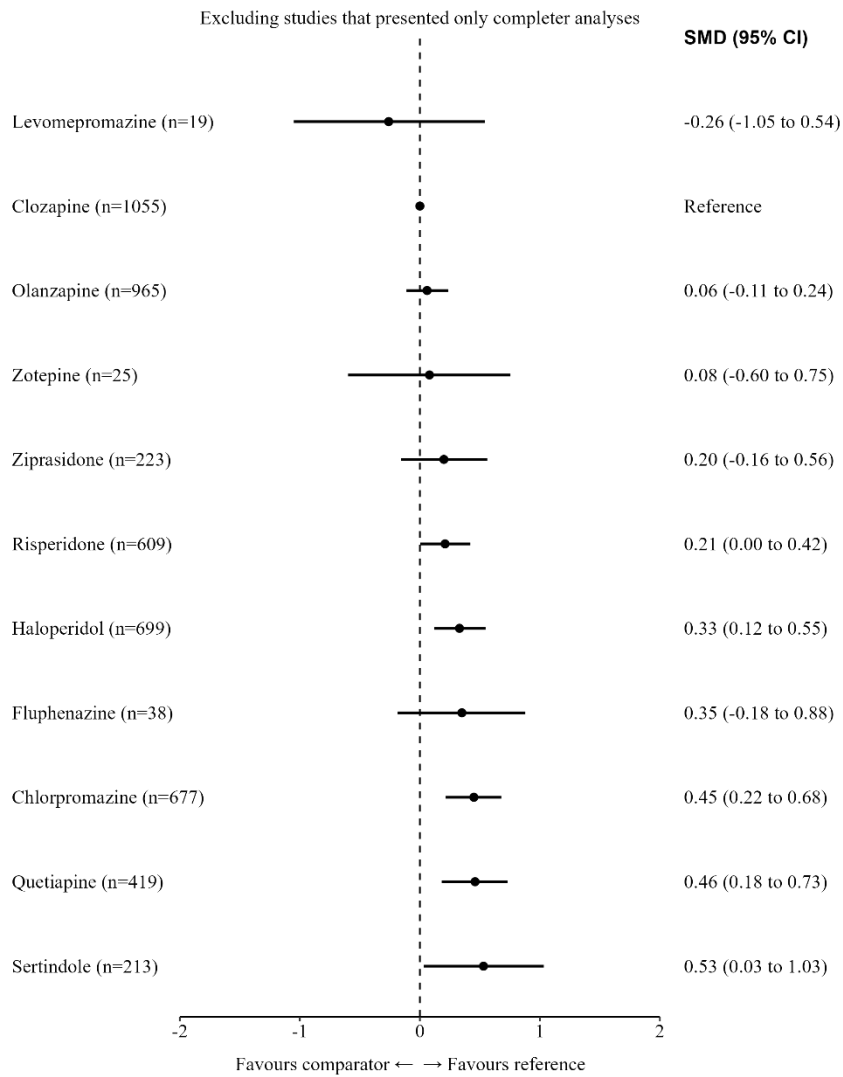

*Effect sizes, measured as standardized mean difference (SMD), are from the network meta-analysis. Order of treatments is according to the mean effect size. Reference is clozapine. The direction of the effect is indicated below the x-axis.*

## League table

|                       |                               |                               |                       |                       |                       |                       |                       |                               |                               |                       |    |
|-----------------------|-------------------------------|-------------------------------|-----------------------|-----------------------|-----------------------|-----------------------|-----------------------|-------------------------------|-------------------------------|-----------------------|----|
| Levomepromazine       | NA                            | NA                            | NA                    | NA                    | NA                    | NA                    | NA                    | NA                            | -0.70 (-1.46 to 0.06)         | NA                    | NA |
| -0.26 (-1.05 to 0.54) | <b>Clozapine</b>              | -0.00 (-0.22 to 0.21)         | -0.08 (-0.75 to 0.60) | 0.02 (-0.48 to 0.53)  | -0.10 (-0.36 to 0.17) | NA                    | -0.18 (-0.51 to 0.14) | <b>-0.77 (-1.09 to -0.46)</b> | <b>-1.01 (-1.89 to -0.13)</b> | NA                    | NA |
| -0.32 (-1.12 to 0.49) | -0.06 (-0.24 to 0.11)         | <b>Olanzapine</b>             | NA                    | NA                    | -0.23 (-0.54 to 0.07) | NA                    | -0.28 (-0.57 to 0.01) | -0.22 (-0.80 to 0.37)         | -0.07 (-0.66 to 0.52)         | NA                    | NA |
| -0.33 (-1.38 to 0.71) | -0.08 (-0.75 to 0.60)         | -0.02 (-0.71 to 0.68)         | <b>Zotepine</b>       | NA                    | NA                    | NA                    | NA                    | NA                            | NA                            | NA                    | NA |
| -0.46 (-1.29 to 0.38) | -0.20 (-0.56 to 0.16)         | -0.14 (-0.53 to 0.25)         | -0.12 (-0.89 to 0.64) | <b>Ziprasidone</b>    | NA                    | NA                    | NA                    | -0.07 (-0.52 to 0.38)         | NA                            | NA                    | NA |
| -0.47 (-1.28 to 0.35) | -0.21 (-0.42 to 0.00)         | -0.15 (-0.37 to 0.07)         | -0.13 (-0.84 to 0.57) | -0.01 (-0.42 to 0.40) | <b>Risperidone</b>    | 0.02 (-0.84 to 0.88)  | -0.07 (-0.44 to 0.30) | NA                            | -0.06 (-0.75 to 0.64)         | -0.32 (-0.78 to 0.13) | NA |
| -0.60 (-1.54 to 0.34) | -0.35 (-0.88 to 0.18)         | -0.28 (-0.82 to 0.25)         | -0.27 (-1.13 to 0.59) | -0.15 (-0.78 to 0.48) | -0.13 (-0.67 to 0.40) | <b>Fluphenazine</b>   | 0.09 (-0.58 to 0.77)  | NA                            | -0.15 (-1.02 to 0.73)         | NA                    | NA |
| -0.59 (-1.40 to 0.22) | <b>-0.33 (-0.55 to -0.12)</b> | <b>-0.27 (-0.48 to -0.06)</b> | -0.26 (-0.97 to 0.45) | -0.13 (-0.54 to 0.27) | -0.12 (-0.36 to 0.12) | 0.01 (-0.50 to 0.52)  | <b>Haloperidol</b>    | NA                            | 0.14 (-0.31 to 0.60)          | NA                    | NA |
| -0.70 (-1.46 to 0.06) | <b>-0.45 (-0.68 to -0.22)</b> | <b>-0.38 (-0.64 to -0.13)</b> | -0.37 (-1.08 to 0.35) | -0.25 (-0.60 to 0.11) | -0.23 (-0.53 to 0.06) | -0.10 (-0.66 to 0.46) | -0.11 (-0.40 to 0.17) | <b>Chlorpromazine</b>         | -0.22 (-0.54 to 0.11)         | NA                    | NA |
| -0.71 (-1.52 to 0.09) | <b>-0.46 (-0.73 to -0.18)</b> | <b>-0.39 (-0.68 to -0.11)</b> | -0.38 (-1.11 to 0.35) | -0.26 (-0.67 to 0.16) | -0.24 (-0.55 to 0.06) | -0.11 (-0.65 to 0.43) | -0.12 (-0.41 to 0.16) | -0.01 (-0.27 to 0.25)         | <b>Quetiapine</b>             | NA                    | NA |
| -0.79 (-1.72 to 0.15) | <b>-0.53 (-1.03 to -0.03)</b> | -0.47 (-0.97 to 0.03)         | -0.45 (-1.30 to 0.39) | -0.33 (-0.94 to 0.28) | -0.32 (-0.78 to 0.13) | -0.19 (-0.89 to 0.51) | -0.20 (-0.71 to 0.32) | -0.09 (-0.63 to 0.45)         | -0.08 (-0.62 to 0.47)         | <b>Sertindole</b>     | NA |

Treatments are presented in order of efficacy ranking. Results of the network meta-analysis are reported in the left lower half and results of pairwise meta-analyses in the right upper half. Each cell provides the effect estimate and the corresponding 95% credible interval (95% CI) of a comparison (left lower half: treatment in column versus treatment in row; right upper half: treatment in row versus treatment in column). The type of effect size measure is standardized mean difference (SMD). Bold results indicate 95% CI excluding no effect. NA=not available.

## 11.5 Excluding studies that did not use operationalized criteria to diagnose schizophrenia

Number of studies:  $k = 44$

Number of pairwise comparisons:  $m = 56$

Number of treatments:  $n = 12$

Number of designs:  $d = 21$

### Network plot

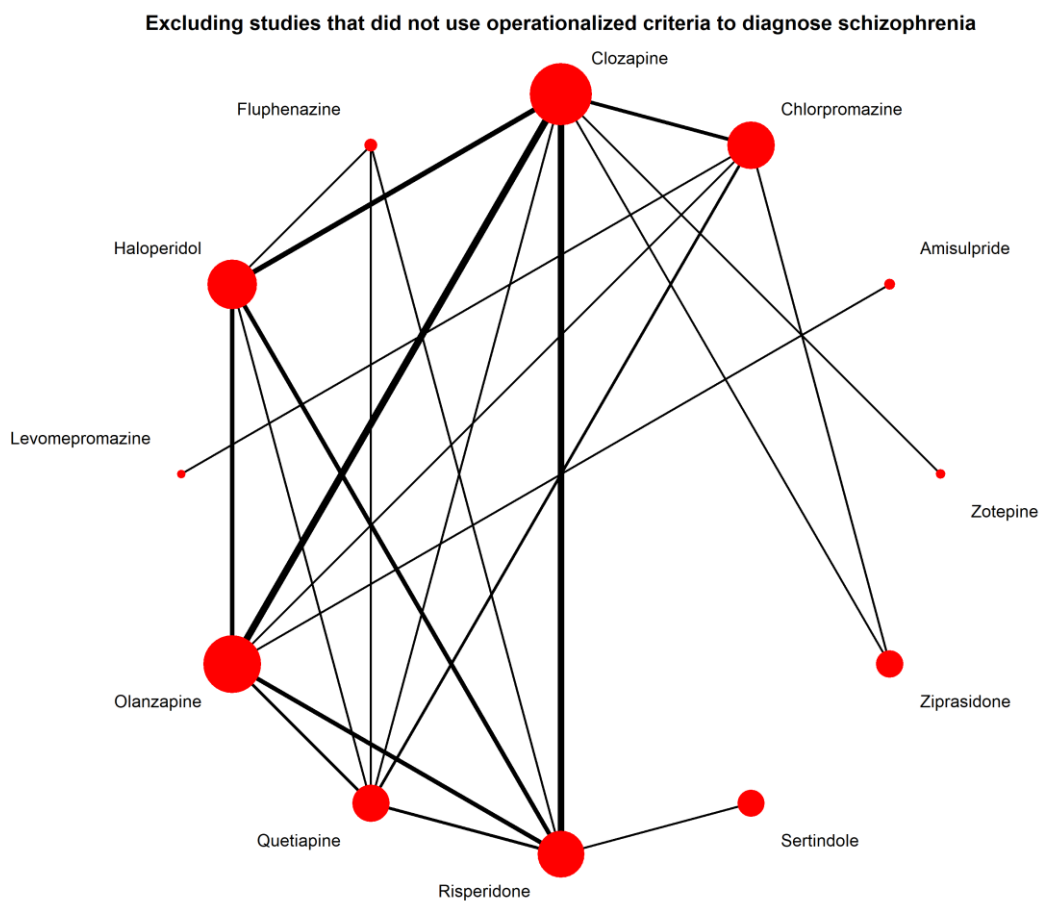

*Lines link treatments with direct comparisons in trials; thickness of lines corresponds to the number of trials evaluating the comparison; size of the nodes corresponds to the number of participants assigned to the treatment.*

| $\tau$ | P-value  | Inconsistency loop (%) |
|--------|----------|------------------------|
| 0.1848 | < 0.0001 | 11.11                  |

## Forest-plot of results of network meta-analysis for antipsychotic drugs versus clozapine

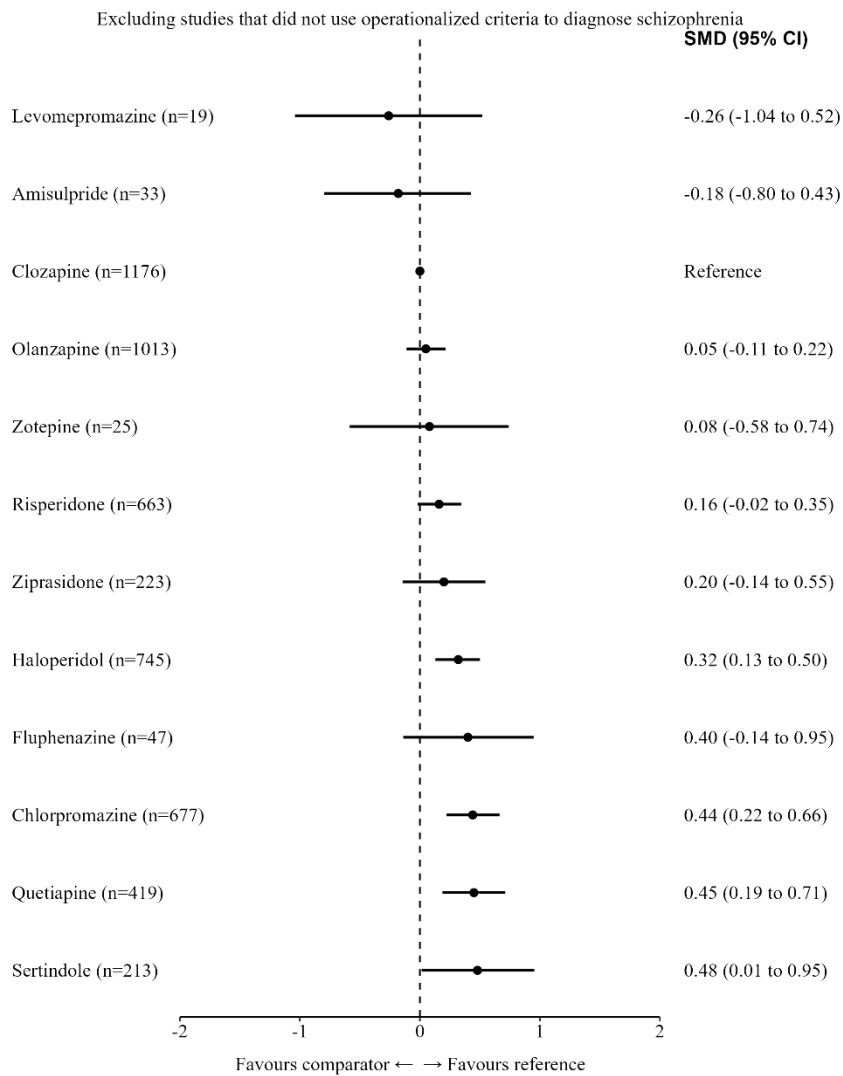

Effect sizes, measured as standardized mean difference (SMD), are from the network meta-analysis. Order of treatments is according to the mean effect size. Reference is clozapine. The direction of the effect is indicated below the x-axis.

**League table**

|                       |                       |                               |                               |                       |                               |                       |                       |                       |                       |                               |                               |    |
|-----------------------|-----------------------|-------------------------------|-------------------------------|-----------------------|-------------------------------|-----------------------|-----------------------|-----------------------|-----------------------|-------------------------------|-------------------------------|----|
| Levomepromazine       | NA                    | NA                            | NA                            | NA                    | NA                            | NA                    | NA                    | NA                    | NA                    | NA                            | -0.70 (-1.45 to 0.05)         | NA |
| -0.08 (-1.06 to 0.91) | Amisulpride           | NA                            | -0.24 (-0.83 to 0.35)         | NA                    | NA                            | NA                    | NA                    | NA                    | NA                    | NA                            | NA                            | NA |
| -0.26 (-1.04 to 0.52) | -0.18 (-0.80 to 0.43) | Clozapine                     | -0.01 (-0.22 to 0.19)         | -0.08 (-0.74 to 0.58) | -0.08 (-0.30 to 0.15)         | 0.02 (-0.47 to 0.51)  | -0.18 (-0.45 to 0.08) | NA                    | NA                    | <b>-0.78 (-1.08 to -0.47)</b> | <b>-1.01 (-1.88 to -0.14)</b> |    |
| -0.31 (-1.10 to 0.48) | -0.24 (-0.83 to 0.35) | -0.05 (-0.22 to 0.11)         | Olanzapine                    | NA                    | -0.23 (-0.53 to 0.06)         | NA                    | -0.28 (-0.56 to 0.00) | NA                    | NA                    | -0.22 (-0.78 to 0.35)         | -0.07 (-0.65 to 0.52)         |    |
| -0.34 (-1.36 to 0.69) | -0.26 (-1.16 to 0.64) | -0.08 (-0.74 to 0.58)         | -0.03 (-0.71 to 0.66)         | Zotepine              | NA                            | NA                    | NA                    | NA                    | NA                    | NA                            | NA                            |    |
| -0.42 (-1.22 to 0.37) | -0.35 (-0.97 to 0.27) | -0.16 (-0.35 to 0.02)         | -0.11 (-0.31 to 0.09)         | -0.09 (-0.77 to 0.60) | Risperidone                   | NA                    | -0.15 (-0.49 to 0.19) | 0.02 (-0.83 to 0.87)  | -0.32 (-0.75 to 0.11) | NA                            | -0.06 (-0.74 to 0.63)         |    |
| -0.46 (-1.28 to 0.36) | -0.39 (-1.08 to 0.31) | -0.20 (-0.55 to 0.14)         | -0.15 (-0.52 to 0.22)         | -0.12 (-0.87 to 0.62) | -0.04 (-0.42 to 0.35)         | Ziprasidone           | NA                    | NA                    | NA                    | -0.07 (-0.50 to 0.36)         | NA                            |    |
| -0.58 (-1.37 to 0.22) | -0.50 (-1.12 to 0.12) | <b>-0.32 (-0.50 to -0.13)</b> | <b>-0.26 (-0.46 to -0.07)</b> | -0.24 (-0.92 to 0.45) | -0.15 (-0.37 to 0.06)         | -0.11 (-0.49 to 0.27) | Haloperidol           | -0.27 (-1.01 to 0.46) | NA                    | NA                            | 0.14 (-0.29 to 0.57)          |    |
| -0.67 (-1.60 to 0.27) | -0.59 (-1.39 to 0.22) | -0.40 (-0.95 to 0.14)         | -0.35 (-0.90 to 0.19)         | -0.33 (-1.18 to 0.53) | -0.24 (-0.79 to 0.30)         | -0.20 (-0.84 to 0.43) | -0.09 (-0.62 to 0.44) | Fluphenazine          | NA                    | NA                            | -0.15 (-1.01 to 0.72)         |    |
| -0.74 (-1.65 to 0.16) | -0.67 (-1.43 to 0.09) | <b>-0.48 (-0.95 to -0.01)</b> | -0.43 (-0.91 to 0.05)         | -0.41 (-1.22 to 0.41) | -0.32 (-0.75 to 0.11)         | -0.28 (-0.86 to 0.30) | -0.17 (-0.65 to 0.31) | -0.08 (-0.77 to 0.62) | Sertindole            | NA                            | NA                            |    |
| -0.70 (-1.45 to 0.05) | -0.63 (-1.27 to 0.01) | <b>-0.44 (-0.66 to -0.22)</b> | <b>-0.39 (-0.64 to -0.14)</b> | -0.36 (-1.06 to 0.33) | <b>-0.28 (-0.55 to -0.01)</b> | -0.24 (-0.58 to 0.09) | -0.13 (-0.39 to 0.14) | -0.04 (-0.60 to 0.53) | 0.04 (-0.47 to 0.55)  | Chlorpromazine                | -0.22 (-0.53 to 0.10)         |    |
| -0.71 (-1.50 to 0.08) | -0.63 (-1.28 to 0.01) | <b>-0.45 (-0.71 to -0.19)</b> | <b>-0.40 (-0.67 to -0.13)</b> | -0.37 (-1.08 to 0.34) | -0.29 (-0.58 to 0.00)         | -0.25 (-0.64 to 0.15) | -0.13 (-0.40 to 0.13) | -0.04 (-0.60 to 0.51) | 0.03 (-0.49 to 0.56)  | -0.01 (-0.26 to 0.24)         | Quetiapine                    |    |

Treatments are presented in order of efficacy ranking. Results of the network meta-analysis are reported in the left lower half and results of pairwise meta-analyses in the right upper half. Each cell provides the effect estimate and the corresponding 95% credible interval (95% CI) of a comparison (left lower half: treatment in column versus treatment in row; right upper half: treatment in row versus treatment in column). The type of effect size measure is standardized mean difference (SMD). Bold results indicate 95% CI excluding no effect. NA=not available.

## 11.6 Excluding studies at high risk of bias

Number of studies:  $k = 23$

Number of pairwise comparisons:  $m = 28$

Number of treatments:  $n = 10$

Number of designs:  $d = 15$

### Network plot

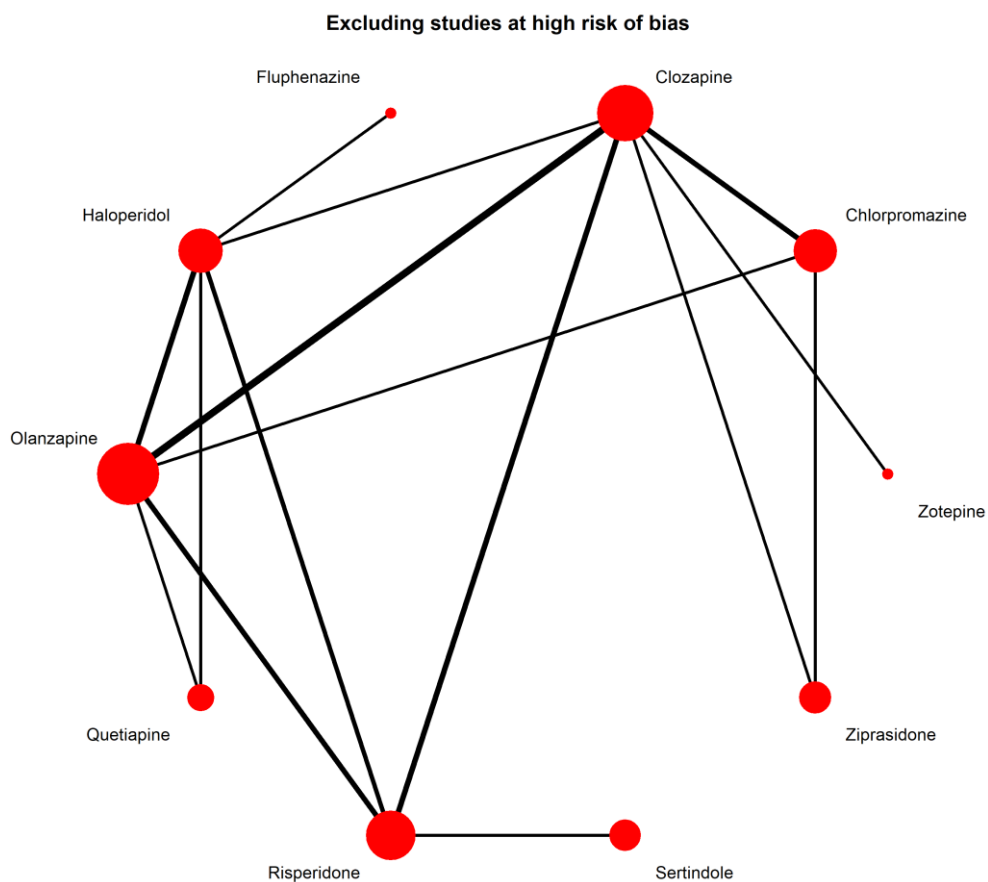

*Lines link treatments with direct comparisons in trials; thickness of lines corresponds to the number of trials evaluating the comparison; size of the nodes corresponds to the number of participants assigned to the treatment.*

| $\tau$ | P-value | Inconsistency loop (%) |
|--------|---------|------------------------|
| 0.1655 | 0.0093  | 25.0                   |

**Forest-plot of results of network meta-analysis for antipsychotic drugs versus clozapine**

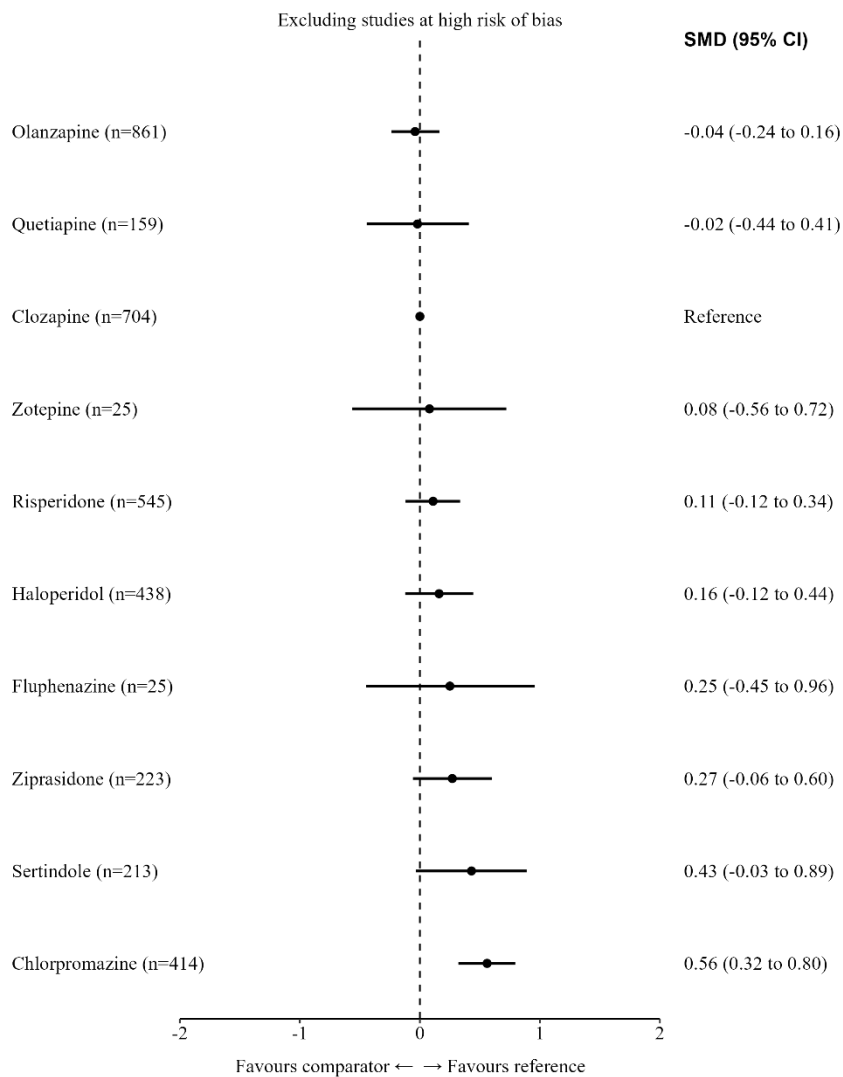

*Effect sizes, measured as standardized mean difference (SMD), are from the network meta-analysis. Order of treatments is according to the mean effect size. Reference is clozapine. The direction of the effect is indicated below the x-axis.*

### League table

|                               |                               |                               |                       |                               |                               |                       |                       |                       |                               |
|-------------------------------|-------------------------------|-------------------------------|-----------------------|-------------------------------|-------------------------------|-----------------------|-----------------------|-----------------------|-------------------------------|
| <b>Olanzapine</b>             | -0.11 (-0.36 to 0.14)         | 0.09 (-0.61 to 0.79)          | NA                    | -0.22 (-0.51 to 0.07)         | -0.24 (-0.51 to 0.04)         | NA                    | NA                    | NA                    | -0.22 (-0.76 to 0.33)         |
| -0.04 (-0.24 to 0.16)         | <b>Clozapine</b>              | NA                            | -0.08 (-0.72 to 0.56) | -0.04 (-0.32 to 0.24)         | 0.12 (-0.44 to 0.67)          | NA                    | 0.02 (-0.44 to 0.48)  | NA                    | <b>-0.78 (-1.07 to -0.49)</b> |
| -0.02 (-0.41 to 0.37)         | 0.02 (-0.41 to 0.44)          | <b>Quetiapine</b>             | NA                    | NA                            | -0.14 (-0.54 to 0.26)         | NA                    | NA                    | NA                    | NA                            |
| -0.11 (-0.79 to 0.56)         | -0.08 (-0.72 to 0.56)         | -0.10 (-0.87 to 0.67)         | <b>Zotepine</b>       | NA                            | NA                            | NA                    | NA                    | NA                    | NA                            |
| -0.14 (-0.37 to 0.08)         | -0.11 (-0.34 to 0.12)         | -0.13 (-0.55 to 0.30)         | -0.03 (-0.71 to 0.65) | <b>Risperidone</b>            | -0.14 (-0.55 to 0.27)         | NA                    | NA                    | -0.32 (-0.72 to 0.08) | NA                            |
| -0.20 (-0.43 to 0.04)         | -0.16 (-0.44 to 0.12)         | -0.18 (-0.53 to 0.17)         | -0.08 (-0.79 to 0.62) | -0.05 (-0.34 to 0.23)         | <b>Haloperidol</b>            | -0.09 (-0.74 to 0.55) | NA                    | NA                    | NA                            |
| -0.29 (-0.97 to 0.39)         | -0.25 (-0.96 to 0.45)         | -0.27 (-1.00 to 0.46)         | -0.18 (-1.13 to 0.78) | -0.15 (-0.85 to 0.56)         | -0.09 (-0.74 to 0.55)         | <b>Fluphenazine</b>   | NA                    | NA                    | NA                            |
| -0.31 (-0.68 to 0.07)         | -0.27 (-0.60 to 0.06)         | -0.29 (-0.82 to 0.24)         | -0.19 (-0.92 to 0.53) | -0.16 (-0.56 to 0.23)         | -0.11 (-0.54 to 0.32)         | -0.02 (-0.79 to 0.75) | <b>Ziprasidone</b>    | NA                    | -0.07 (-0.47 to 0.32)         |
| -0.46 (-0.92 to 0.00)         | -0.43 (-0.89 to 0.03)         | -0.45 (-1.03 to 0.14)         | -0.35 (-1.14 to 0.44) | -0.32 (-0.72 to 0.08)         | -0.27 (-0.76 to 0.22)         | -0.17 (-0.98 to 0.63) | -0.16 (-0.72 to 0.41) | <b>Sertindole</b>     | NA                            |
| <b>-0.59 (-0.88 to -0.31)</b> | <b>-0.56 (-0.80 to -0.32)</b> | <b>-0.58 (-1.05 to -0.10)</b> | -0.48 (-1.16 to 0.21) | <b>-0.45 (-0.77 to -0.13)</b> | <b>-0.40 (-0.75 to -0.04)</b> | -0.30 (-1.04 to 0.43) | -0.29 (-0.60 to 0.03) | -0.13 (-0.64 to 0.38) | <b>Chlorpromazine</b>         |

Treatments are presented in order of efficacy ranking. Results of the network meta-analysis are reported in the left lower half and results of pairwise meta-analyses in the right upper half. Each cell provides the effect estimate and the corresponding 95% credible interval (95% CI) of a comparison (left lower half: treatment in column versus treatment in row; right upper half: treatment in row versus treatment in column). The type of effect size measure is standardized mean difference (SMD). Bold results indicate 95% CI excluding no effect. NA=not available.



## 11.7 Excluding studies that only included children and/or adolescents

Number of studies:  $k = 40$

Number of pairwise comparisons:  $m = 52$

Number of treatments:  $n = 12$

Number of designs:  $d = 21$

### Network plot

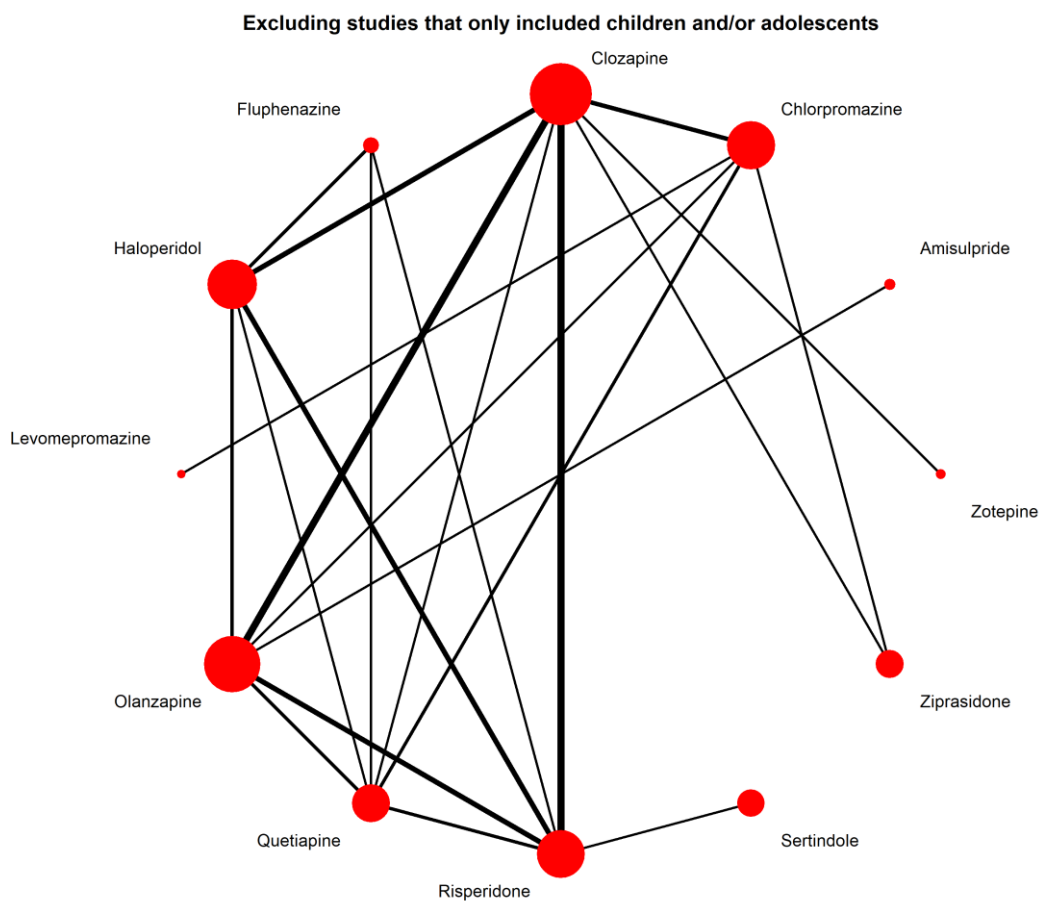

*Lines link treatments with direct comparisons in trials; thickness of lines corresponds to the number of trials evaluating the comparison; size of the nodes corresponds to the number of participants assigned to the treatment.*

| $\tau$ | P-value  | Inconsistency loop (%) |
|--------|----------|------------------------|
| 0.1874 | < 0.0001 | 16.67                  |

## Forest-plot of results of network meta-analysis for antipsychotic drugs versus clozapine

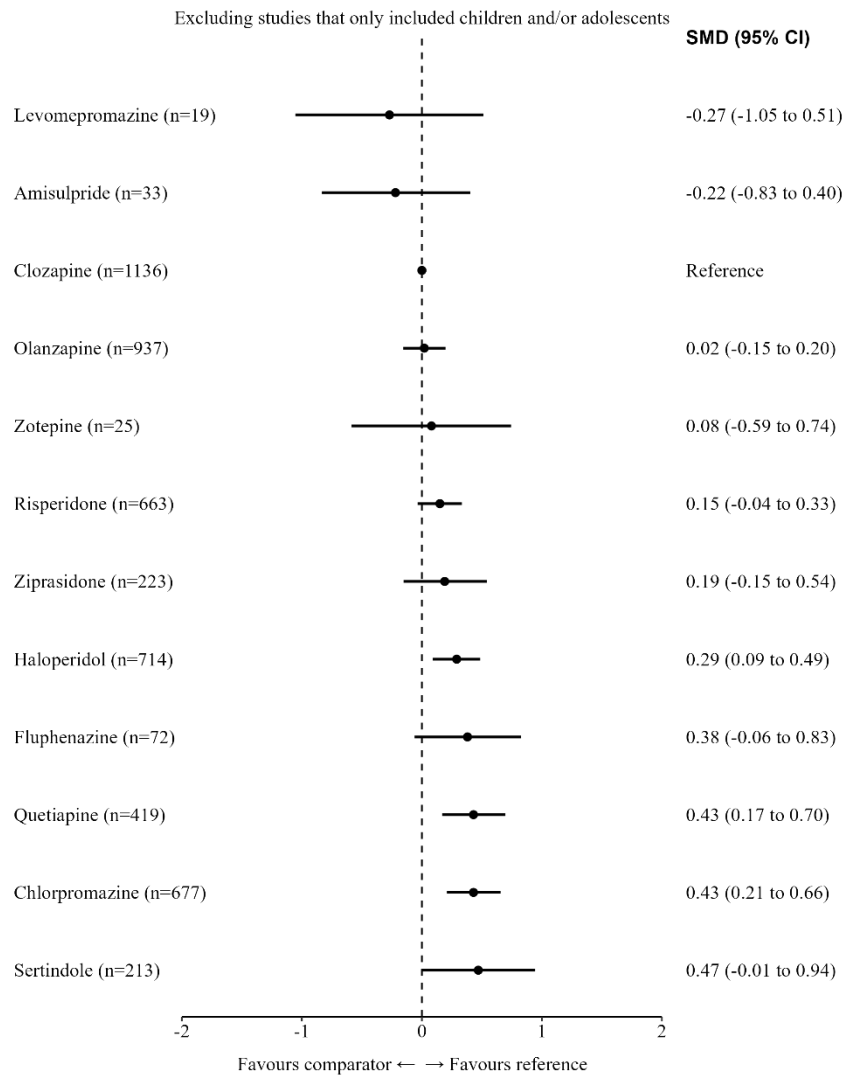

Effect sizes, measured as standardized mean difference (SMD), are from the network meta-analysis. Order of treatments is according to the mean effect size. Reference is clozapine. The direction of the effect is indicated below the x-axis.

### League table

|                       |                       |                               |                               |                       |                               |                       |                       |                       |                       |                               |                               |
|-----------------------|-----------------------|-------------------------------|-------------------------------|-----------------------|-------------------------------|-----------------------|-----------------------|-----------------------|-----------------------|-------------------------------|-------------------------------|
| Amisulpride           | NA                    | NA                            | -0.24 (-0.83 to 0.36)         | NA                    | NA                            | NA                    | NA                    | NA                    | NA                    | NA                            | NA                            |
| 0.05 (-0.94 to 1.04)  | Levomepromazine       | NA                            | NA                            | NA                    | NA                            | NA                    | NA                    | NA                    | NA                    | NA                            | -0.70 (-1.45 to 0.05)         |
| -0.22 (-0.83 to 0.40) | -0.27 (-1.05 to 0.51) | Clozapine                     | 0.03 (-0.19 to 0.25)          | -0.08 (-0.74 to 0.59) | -0.08 (-0.30 to 0.15)         | 0.02 (-0.47 to 0.51)  | -0.13 (-0.41 to 0.14) | NA                    | NA                    | <b>-1.01 (-1.89 to -0.13)</b> | <b>-0.78 (-1.08 to -0.47)</b> |
| -0.24 (-0.83 to 0.36) | -0.29 (-1.08 to 0.50) | -0.02 (-0.20 to 0.15)         | Olanzapine                    | NA                    | -0.23 (-0.53 to 0.06)         | NA                    | -0.30 (-0.64 to 0.04) | NA                    | NA                    | -0.07 (-0.65 to 0.52)         | -0.22 (-0.79 to 0.36)         |
| -0.29 (-1.20 to 0.61) | -0.35 (-1.38 to 0.68) | -0.08 (-0.74 to 0.59)         | -0.06 (-0.75 to 0.63)         | Zotepine              | NA                            | NA                    | NA                    | NA                    | NA                    | NA                            | NA                            |
| -0.36 (-0.99 to 0.26) | -0.42 (-1.22 to 0.38) | -0.15 (-0.33 to 0.04)         | -0.13 (-0.34 to 0.08)         | -0.07 (-0.76 to 0.62) | Risperidone                   | NA                    | -0.15 (-0.49 to 0.19) | 0.02 (-0.83 to 0.87)  | -0.32 (-0.76 to 0.12) | -0.06 (-0.74 to 0.63)         | NA                            |
| -0.41 (-1.11 to 0.29) | -0.47 (-1.29 to 0.36) | -0.19 (-0.54 to 0.15)         | -0.17 (-0.55 to 0.20)         | -0.12 (-0.87 to 0.63) | -0.05 (-0.43 to 0.34)         | Ziprasidone           | NA                    | NA                    | NA                    | NA                            | -0.07 (-0.50 to 0.36)         |
| -0.50 (-1.14 to 0.13) | -0.56 (-1.36 to 0.24) | <b>-0.29 (-0.49 to -0.09)</b> | <b>-0.27 (-0.48 to -0.05)</b> | -0.21 (-0.90 to 0.48) | -0.14 (-0.36 to 0.08)         | -0.09 (-0.48 to 0.29) | Haloperidol           | -0.17 (-0.67 to 0.32) | NA                    | 0.14 (-0.29 to 0.58)          | NA                            |
| -0.60 (-1.34 to 0.15) | -0.65 (-1.54 to 0.24) | -0.38 (-0.83 to 0.06)         | -0.36 (-0.81 to 0.09)         | -0.30 (-1.10 to 0.50) | -0.23 (-0.68 to 0.21)         | -0.19 (-0.74 to 0.37) | -0.09 (-0.51 to 0.32) | Fluphenazine          | NA                    | -0.15 (-1.01 to 0.72)         | NA                            |
| -0.69 (-1.45 to 0.08) | -0.74 (-1.65 to 0.17) | -0.47 (-0.94 to 0.01)         | -0.45 (-0.93 to 0.04)         | -0.39 (-1.21 to 0.43) | -0.32 (-0.76 to 0.12)         | -0.27 (-0.86 to 0.31) | -0.18 (-0.67 to 0.31) | -0.09 (-0.71 to 0.54) | Sertindole            | NA                            | NA                            |
| -0.65 (-1.30 to 0.01) | -0.70 (-1.50 to 0.09) | <b>-0.43 (-0.70 to -0.17)</b> | <b>-0.41 (-0.69 to -0.13)</b> | -0.35 (-1.07 to 0.36) | -0.28 (-0.58 to 0.01)         | -0.24 (-0.64 to 0.16) | -0.14 (-0.42 to 0.13) | -0.05 (-0.52 to 0.42) | 0.04 (-0.49 to 0.56)  | Quetiapine                    | 0.22 (-0.10 to 0.53)          |
| -0.65 (-1.29 to 0.00) | -0.70 (-1.45 to 0.05) | <b>-0.43 (-0.66 to -0.21)</b> | <b>-0.41 (-0.67 to -0.16)</b> | -0.35 (-1.06 to 0.35) | <b>-0.28 (-0.56 to -0.01)</b> | -0.24 (-0.58 to 0.10) | -0.14 (-0.41 to 0.13) | -0.05 (-0.52 to 0.43) | 0.04 (-0.48 to 0.55)  | 0.00 (-0.25 to 0.25)          | Chlorpromazine                |

Treatments are presented in order of efficacy ranking. Results of the network meta-analysis are reported in the left lower half and results of pairwise meta-analyses in the right upper half. Each cell provides the effect estimate and the corresponding 95% credible interval (95% CI) of a comparison (left lower half: treatment in column versus treatment in row; right upper half: treatment in row versus treatment in column). The type of effect size measure is standardized mean difference (SMD). Bold results indicate 95% CI excluding no effect. NA=not available.

## 11.8 Excluding low clozapine doses (<400 mg)

Number of studies:  $k = 32$

Number of pairwise comparisons:  $m = 39$

Number of treatments:  $n = 11$

Number of designs:  $d = 18$

### Network plot

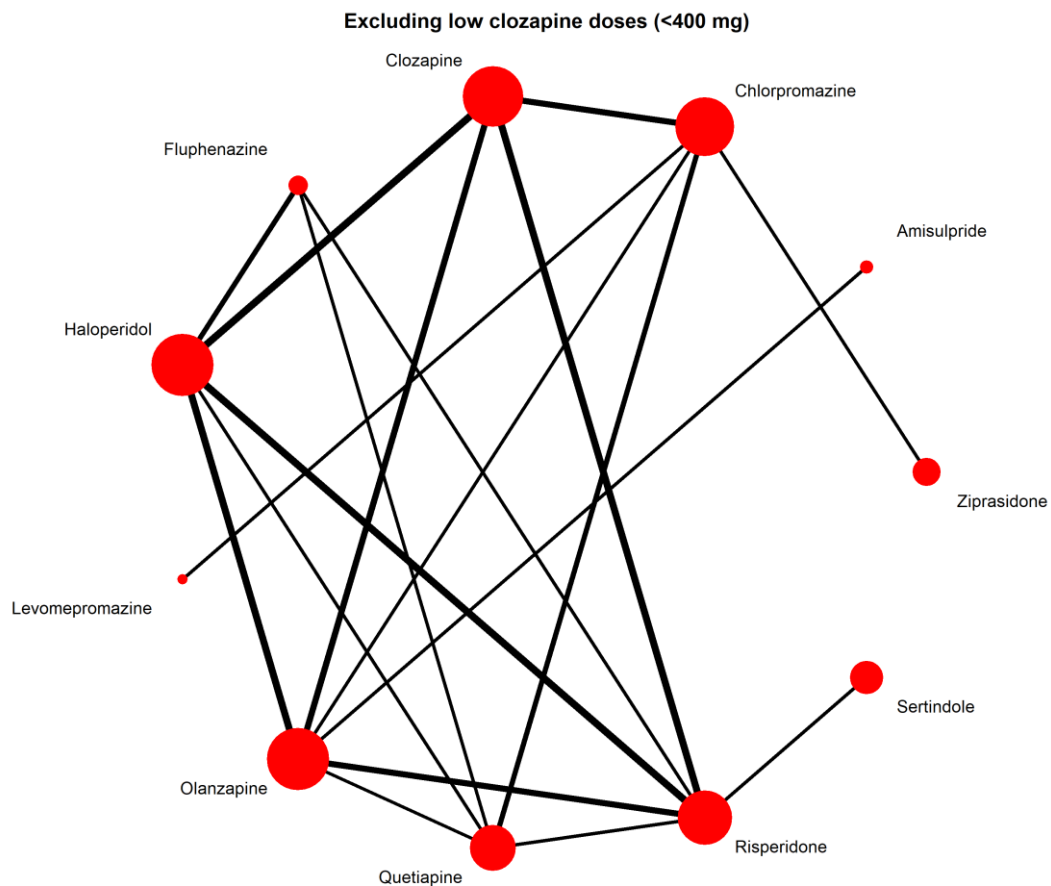

*Lines link treatments with direct comparisons in trials; thickness of lines corresponds to the number of trials evaluating the comparison; size of the nodes corresponds to the number of participants assigned to the treatment.*

| $\tau$ | P-value | Inconsistency loop (%) |
|--------|---------|------------------------|
| 0.1786 | 0.0003  | 26.67                  |

**Forest-plot of results of network meta-analysis for antipsychotic drugs versus clozapine**

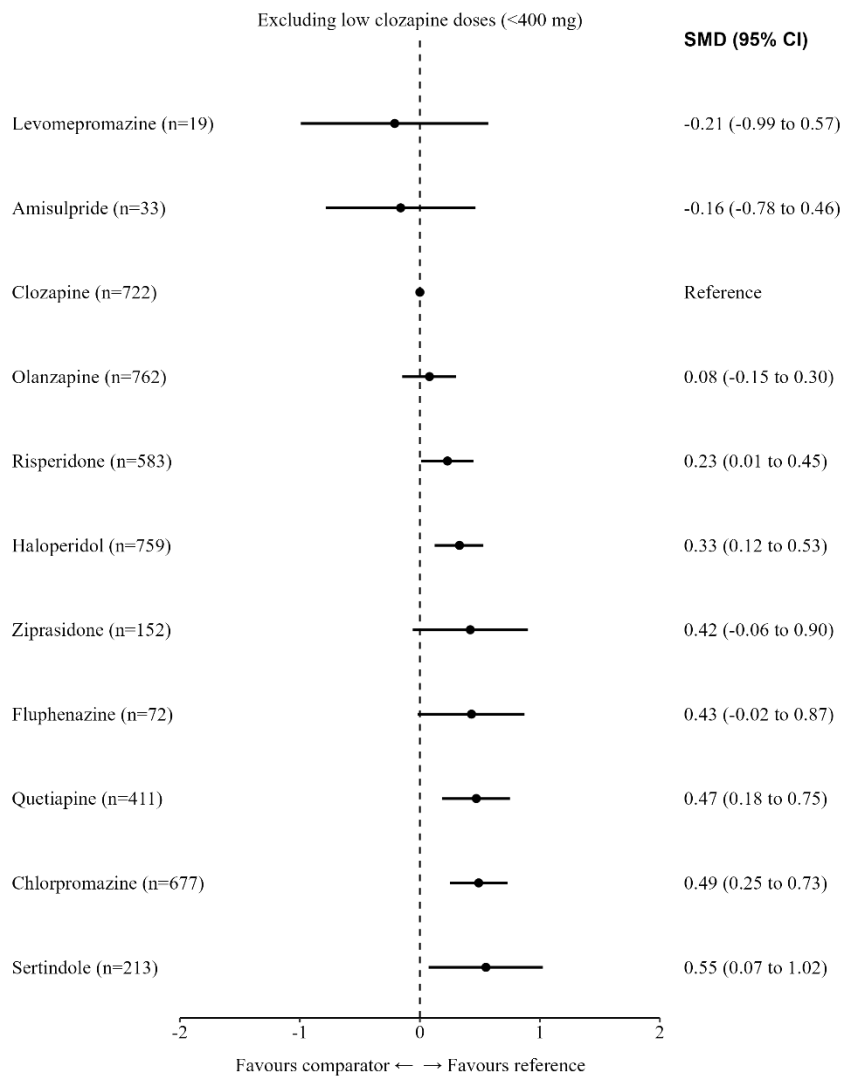

*Effect sizes, measured as standardized mean difference (SMD), are from the network meta-analysis. Order of treatments is according to the mean effect size. Reference is clozapine. The direction of the effect is indicated below the x-axis.*

### League table

|                               |                       |                               |                               |                       |                               |                       |                       |                       |                               |                       |
|-------------------------------|-----------------------|-------------------------------|-------------------------------|-----------------------|-------------------------------|-----------------------|-----------------------|-----------------------|-------------------------------|-----------------------|
| Amisulpride                   | NA                    | NA                            | -0.24 (-0.82 to 0.35)         | NA                    | NA                            | NA                    | NA                    | NA                    | NA                            | NA                    |
| 0.05 (-0.93 to 1.03)          | Levomepromazine       | NA                            | NA                            | NA                    | NA                            | NA                    | NA                    | NA                    | -0.70 (-1.45 to 0.04)         | NA                    |
| -0.16 (-0.78 to 0.46)         | -0.21 (-0.99 to 0.57) | Clozapine                     | 0.15 (-0.22 to 0.53)          | -0.13 (-0.41 to 0.15) | -0.14 (-0.40 to 0.13)         | NA                    | NA                    | NA                    | <b>-0.78 (-1.07 to -0.48)</b> | NA                    |
| -0.24 (-0.82 to 0.35)         | -0.29 (-1.08 to 0.50) | -0.08 (-0.30 to 0.15)         | Olanzapine                    | -0.22 (-0.52 to 0.09) | <b>-0.28 (-0.55 to -0.01)</b> | NA                    | NA                    | 0.09 (-0.62 to 0.81)  | -0.22 (-0.78 to 0.34)         | NA                    |
| -0.39 (-1.01 to 0.24)         | -0.44 (-1.24 to 0.36) | <b>-0.23 (-0.45 to -0.01)</b> | -0.15 (-0.38 to 0.07)         | Risperidone           | -0.15 (-0.48 to 0.19)         | NA                    | 0.02 (-0.82 to 0.87)  | -0.12 (-0.98 to 0.74) | NA                            | -0.32 (-0.74 to 0.10) |
| -0.49 (-1.10 to 0.13)         | -0.54 (-1.33 to 0.25) | <b>-0.33 (-0.53 to -0.12)</b> | <b>-0.25 (-0.46 to -0.04)</b> | -0.10 (-0.32 to 0.13) | Haloperidol                   | NA                    | -0.17 (-0.66 to 0.31) | 0.14 (-0.28 to 0.56)  | NA                            | NA                    |
| -0.58 (-1.35 to 0.19)         | -0.63 (-1.48 to 0.22) | -0.42 (-0.90 to 0.06)         | -0.34 (-0.84 to 0.16)         | -0.19 (-0.70 to 0.32) | -0.09 (-0.59 to 0.40)         | Ziprasidone           | NA                    | NA                    | -0.07 (-0.49 to 0.34)         | NA                    |
| -0.59 (-1.32 to 0.15)         | -0.64 (-1.52 to 0.24) | -0.43 (-0.87 to 0.02)         | -0.35 (-0.80 to 0.10)         | -0.20 (-0.64 to 0.25) | -0.10 (-0.51 to 0.31)         | -0.01 (-0.64 to 0.62) | Fluphenazine          | -0.15 (-1.01 to 0.71) | NA                            | NA                    |
| -0.63 (-1.28 to 0.02)         | -0.68 (-1.46 to 0.11) | <b>-0.47 (-0.75 to -0.18)</b> | <b>-0.39 (-0.68 to -0.10)</b> | -0.24 (-0.55 to 0.07) | -0.14 (-0.42 to 0.13)         | -0.05 (-0.53 to 0.44) | -0.04 (-0.51 to 0.43) | Quetiapine            | 0.22 (-0.09 to 0.52)          | NA                    |
| <b>-0.65 (-1.30 to -0.01)</b> | -0.70 (-1.45 to 0.04) | <b>-0.49 (-0.73 to -0.25)</b> | <b>-0.41 (-0.69 to -0.14)</b> | -0.26 (-0.56 to 0.03) | -0.17 (-0.44 to 0.10)         | -0.07 (-0.49 to 0.34) | -0.06 (-0.54 to 0.41) | -0.02 (-0.28 to 0.23) | Chlorpromazine                | NA                    |
| -0.71 (-1.46 to 0.05)         | -0.76 (-1.66 to 0.14) | <b>-0.55 (-1.02 to -0.07)</b> | -0.47 (-0.95 to 0.01)         | -0.32 (-0.74 to 0.10) | -0.22 (-0.70 to 0.25)         | -0.13 (-0.79 to 0.53) | -0.12 (-0.74 to 0.49) | -0.08 (-0.61 to 0.44) | -0.06 (-0.57 to 0.46)         | Sertindole            |

Treatments are presented in order of efficacy ranking. Results of the network meta-analysis are reported in the left lower half and results of pairwise meta-analyses in the right upper half. Each cell provides the effect estimate and the corresponding 95% credible interval (95% CI) of a comparison (left lower half: treatment in column versus treatment in row; right upper half: treatment in row versus treatment in column). The type of effect size measure is standardized mean difference (SMD). Bold results indicate 95% CI excluding no effect. NA=not available.

## 11.9 Excluding studies from clozapine's manufacturer

Number of studies:  $k = 41$

Number of pairwise comparisons:  $m = 53$

Number of treatments:  $n = 12$

Number of designs:  $d = 21$

### Network plot

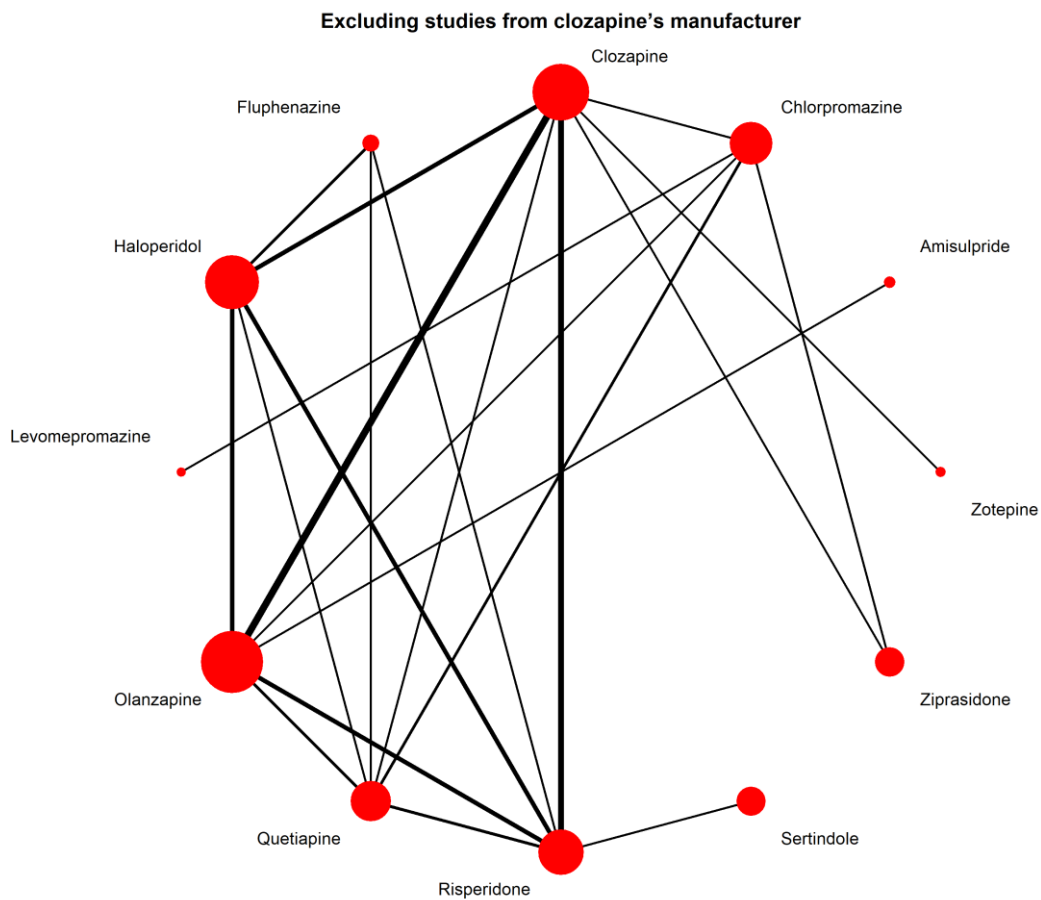

*Lines link treatments with direct comparisons in trials; thickness of lines corresponds to the number of trials evaluating the comparison; size of the nodes corresponds to the number of participants assigned to the treatment.*

| $\tau$ | P-value | Inconsistency loop (%) |
|--------|---------|------------------------|
| 0.0768 | 0.0804  | 16.67                  |

**Forest-plot of results of network meta-analysis for antipsychotic drugs versus clozapine**

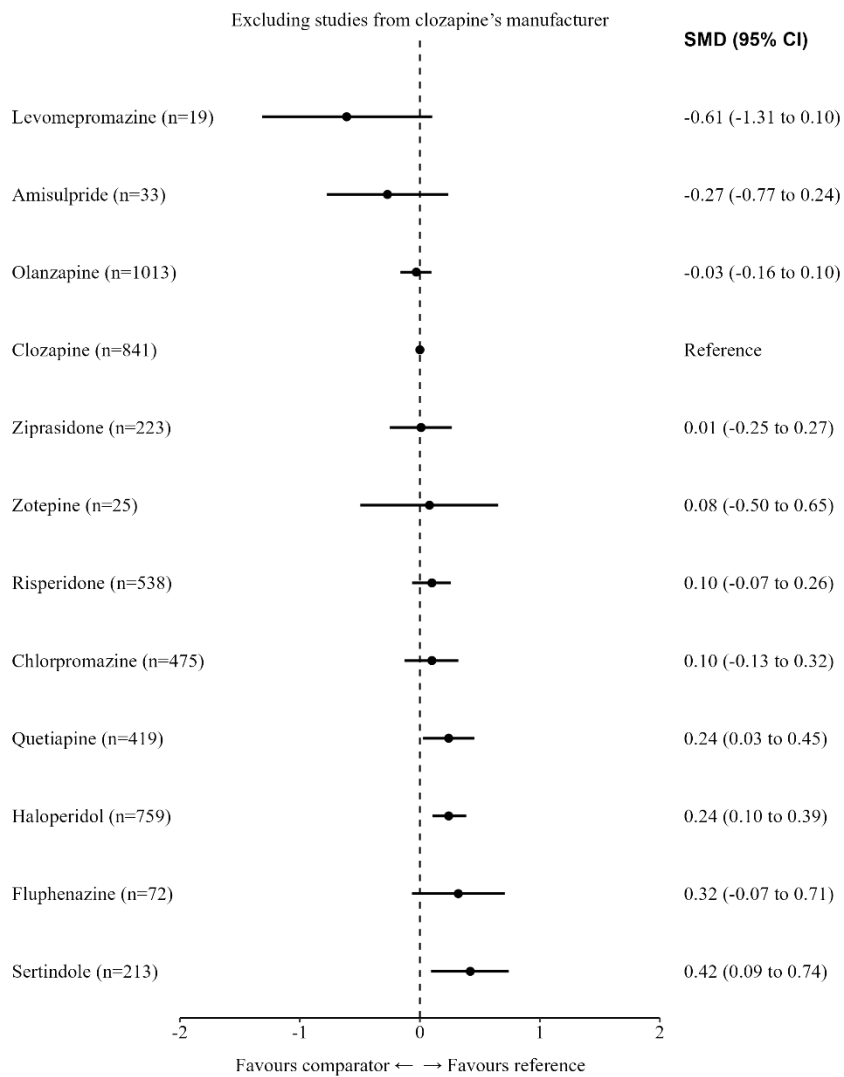

Effect sizes, measured as standardized mean difference (SMD), are from the network meta-analysis. Order of treatments is according to the mean effect size. Reference is clozapine. The direction of the effect is indicated below the x-axis.



### League table

|                               |                               |                               |                               |                       |                       |                               |                               |                               |                               |                       |                               |
|-------------------------------|-------------------------------|-------------------------------|-------------------------------|-----------------------|-----------------------|-------------------------------|-------------------------------|-------------------------------|-------------------------------|-----------------------|-------------------------------|
| Levomepromazine               | NA                            | NA                            | NA                            | NA                    | NA                    | <b>-0.70 (-1.37 to -0.03)</b> | NA                            | NA                            | NA                            | NA                    | NA                            |
| -0.34 (-1.20 to 0.52)         | Amisulpride                   | -0.24 (-0.73 to 0.25)         | NA                            | NA                    | NA                    | NA                            | NA                            | NA                            | NA                            | NA                    | NA                            |
| -0.57 (-1.28 to 0.14)         | -0.24 (-0.73 to 0.25)         | Olanzapine                    | -0.02 (-0.19 to 0.14)         | NA                    | NA                    | -0.22 (-0.68 to 0.25)         | <b>-0.23 (-0.44 to -0.02)</b> | -0.05 (-0.58 to 0.48)         | <b>-0.27 (-0.46 to -0.08)</b> | NA                    | NA                            |
| -0.61 (-1.31 to 0.10)         | -0.27 (-0.77 to 0.24)         | -0.03 (-0.16 to 0.10)         | Clozapine                     | 0.02 (-0.34 to 0.38)  | -0.08 (-0.65 to 0.50) | <b>-0.76 (-1.42 to -0.10)</b> | 0.04 (-0.19 to 0.26)          | <b>-1.01 (-1.82 to -0.20)</b> | -0.18 (-0.37 to 0.01)         | NA                    | NA                            |
| -0.61 (-1.32 to 0.10)         | -0.28 (-0.84 to 0.28)         | -0.04 (-0.31 to 0.23)         | -0.01 (-0.27 to 0.25)         | Ziprasidone           | NA                    | -0.07 (-0.34 to 0.20)         | NA                            | NA                            | NA                            | NA                    | NA                            |
| -0.68 (-1.60 to 0.23)         | -0.35 (-1.11 to 0.42)         | -0.11 (-0.70 to 0.48)         | -0.08 (-0.65 to 0.50)         | -0.07 (-0.70 to 0.56) | Zotepine              | NA                            | NA                            | NA                            | NA                            | NA                    | NA                            |
| <b>-0.70 (-1.37 to -0.03)</b> | -0.37 (-0.90 to 0.17)         | -0.13 (-0.36 to 0.10)         | -0.10 (-0.32 to 0.13)         | -0.09 (-0.32 to 0.14) | -0.02 (-0.64 to 0.60) | Chlorpromazine                | NA                            | <b>-0.22 (-0.42 to -0.01)</b> | NA                            | NA                    | NA                            |
| -0.70 (-1.42 to 0.02)         | -0.37 (-0.88 to 0.15)         | -0.13 (-0.29 to 0.03)         | -0.10 (-0.26 to 0.07)         | -0.09 (-0.38 to 0.20) | -0.02 (-0.62 to 0.58) | -0.00 (-0.25 to 0.25)         | Risperidone                   | -0.06 (-0.70 to 0.58)         | -0.14 (-0.43 to 0.15)         | 0.02 (-0.76 to 0.81)  | <b>-0.32 (-0.60 to -0.04)</b> |
| <b>-0.85 (-1.54 to -0.15)</b> | -0.51 (-1.04 to 0.02)         | <b>-0.27 (-0.49 to -0.06)</b> | <b>-0.24 (-0.45 to -0.03)</b> | -0.23 (-0.50 to 0.04) | -0.16 (-0.78 to 0.45) | -0.14 (-0.33 to 0.04)         | -0.14 (-0.38 to 0.09)         | Quetiapine                    | -0.14 (-0.42 to 0.14)         | 0.15 (-0.65 to 0.95)  | NA                            |
| <b>-0.85 (-1.56 to -0.14)</b> | <b>-0.51 (-1.02 to -0.01)</b> | <b>-0.28 (-0.42 to -0.14)</b> | <b>-0.24 (-0.39 to -0.10)</b> | -0.24 (-0.51 to 0.04) | -0.17 (-0.76 to 0.42) | -0.15 (-0.38 to 0.08)         | -0.15 (-0.32 to 0.02)         | -0.00 (-0.21 to 0.20)         | Haloperidol                   | -0.17 (-0.60 to 0.26) | NA                            |
| <b>-0.93 (-1.72 to -0.13)</b> | -0.59 (-1.21 to 0.03)         | -0.35 (-0.74 to 0.03)         | -0.32 (-0.71 to 0.07)         | -0.31 (-0.76 to 0.14) | -0.24 (-0.94 to 0.45) | -0.22 (-0.64 to 0.20)         | -0.22 (-0.62 to 0.17)         | -0.08 (-0.48 to 0.32)         | -0.08 (-0.44 to 0.29)         | Fluphenazine          | NA                            |
| <b>-1.02 (-1.79 to -0.25)</b> | <b>-0.69 (-1.27 to -0.10)</b> | <b>-0.45 (-0.77 to -0.13)</b> | <b>-0.42 (-0.74 to -0.09)</b> | -0.41 (-0.81 to 0.00) | -0.34 (-1.00 to 0.32) | -0.32 (-0.70 to 0.06)         | <b>-0.32 (-0.60 to -0.04)</b> | -0.18 (-0.55 to 0.19)         | -0.17 (-0.50 to 0.16)         | -0.10 (-0.58 to 0.39) | Sertindole                    |

Treatments are presented in order of efficacy ranking. Results of the network meta-analysis are reported in the left lower half and results of pairwise meta-analyses in the right upper half. Each cell provides the effect estimate and the corresponding 95% credible interval (95% CI) of a comparison (left lower half: treatment in column versus treatment in row; right upper half: treatment in row versus treatment in column). The type of effect size measure is standardized mean difference (SMD). Bold results indicate 95% CI excluding no effect. NA=not available.

### 11.10 Excluding studies from olanzapine's manufacturer

Number of studies:  $k = 35$

Number of pairwise comparisons:  $m = 42$

Number of treatments:  $n = 12$

Number of designs:  $d = 19$

#### Network plot

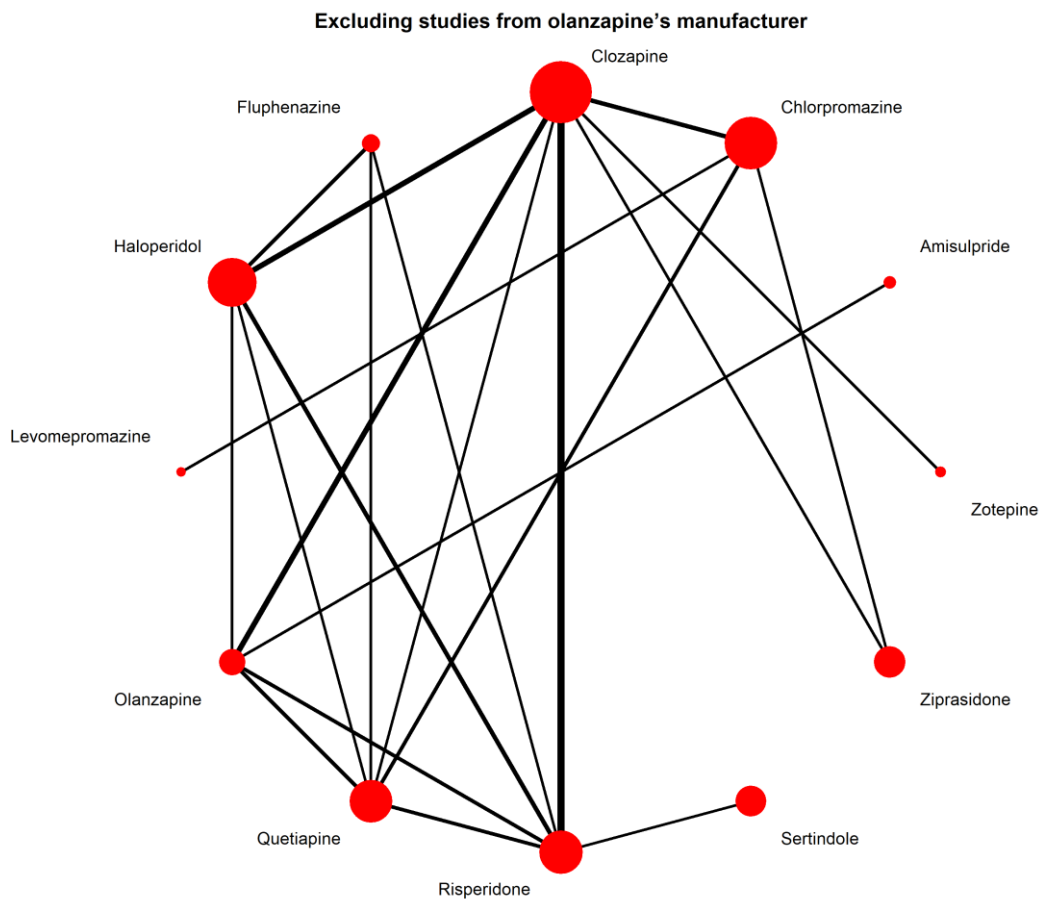

*Lines link treatments with direct comparisons in trials; thickness of lines corresponds to the number of trials evaluating the comparison; size of the nodes corresponds to the number of participants assigned to the treatment.*

| $\tau$ | P-value | Inconsistency loop (%) |
|--------|---------|------------------------|
| 0.2106 | 0.0004  | 11.76                  |

**Forest-plot of results of network meta-analysis for antipsychotic drugs versus clozapine**

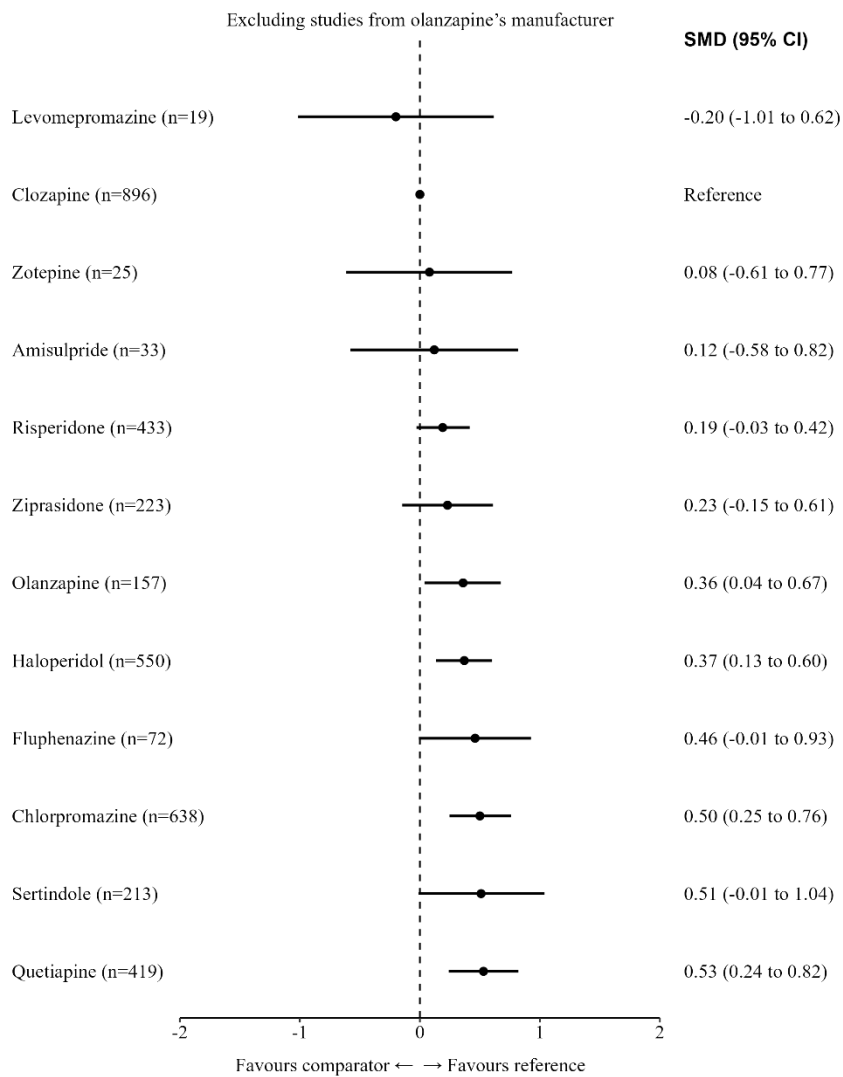

*Effect sizes, measured as standardized mean difference (SMD), are from the network meta-analysis. Order of treatments is according to the mean effect size. Reference is clozapine. The direction of the effect is indicated below the x-axis.*

## League table

|                       |                               |                       |                       |                               |                       |                       |                       |                       |                       |                       |                               |                               |
|-----------------------|-------------------------------|-----------------------|-----------------------|-------------------------------|-----------------------|-----------------------|-----------------------|-----------------------|-----------------------|-----------------------|-------------------------------|-------------------------------|
| Levomepromazine       | NA                            | NA                    | NA                    | NA                            | NA                    | NA                    | NA                    | NA                    | NA                    | NA                    | -0.70 (-1.48 to 0.07)         | NA                            |
| -0.20 (-1.01 to 0.62) | <b>Clozapine</b>              | -0.08 (-0.77 to 0.61) | NA                    | -0.13 (-0.40 to 0.13)         | 0.02 (-0.50 to 0.55)  | -0.43 (-0.88 to 0.01) | -0.27 (-0.58 to 0.05) | NA                    | NA                    | NA                    | <b>-0.77 (-1.10 to -0.45)</b> | <b>-1.01 (-1.91 to -0.11)</b> |
| -0.28 (-1.35 to 0.79) | -0.08 (-0.77 to 0.61)         | <b>Zotepine</b>       | NA                    | NA                            | NA                    | NA                    | NA                    | NA                    | NA                    | NA                    | NA                            | NA                            |
| -0.32 (-1.38 to 0.75) | -0.12 (-0.82 to 0.58)         | -0.04 (-1.03 to 0.94) | <b>Amisulpride</b>    | NA                            | NA                    | -0.24 (-0.86 to 0.39) | NA                    | NA                    | NA                    | NA                    | NA                            | NA                            |
| -0.39 (-1.23 to 0.45) | -0.19 (-0.42 to 0.03)         | -0.12 (-0.84 to 0.61) | -0.07 (-0.79 to 0.64) | <b>Risperidone</b>            | NA                    | 0.25 (-0.40 to 0.90)  | -0.17 (-0.61 to 0.27) | 0.02 (-0.85 to 0.89)  | -0.32 (-0.80 to 0.16) | NA                    | NA                            | -0.05 (-0.75 to 0.64)         |
| -0.43 (-1.29 to 0.43) | -0.23 (-0.61 to 0.15)         | -0.15 (-0.94 to 0.64) | -0.11 (-0.90 to 0.68) | -0.04 (-0.47 to 0.39)         | <b>Ziprasidone</b>    | NA                    | NA                    | NA                    | NA                    | NA                    | -0.07 (-0.54 to 0.40)         | NA                            |
| -0.56 (-1.42 to 0.31) | <b>-0.36 (-0.67 to -0.04)</b> | -0.28 (-1.04 to 0.48) | -0.24 (-0.86 to 0.39) | -0.16 (-0.51 to 0.19)         | -0.13 (-0.61 to 0.36) | <b>Olanzapine</b>     | -0.02 (-0.66 to 0.63) | NA                    | NA                    | NA                    | NA                            | -0.07 (-0.67 to 0.53)         |
| -0.57 (-1.40 to 0.27) | <b>-0.37 (-0.60 to -0.13)</b> | -0.29 (-1.02 to 0.44) | -0.25 (-0.96 to 0.46) | -0.17 (-0.44 to 0.09)         | -0.14 (-0.57 to 0.29) | -0.01 (-0.35 to 0.33) | <b>Haloperidol</b>    | -0.17 (-0.69 to 0.34) | NA                    | NA                    | NA                            | 0.14 (-0.33 to 0.62)          |
| -0.66 (-1.58 to 0.27) | -0.46 (-0.93 to 0.01)         | -0.38 (-1.22 to 0.45) | -0.34 (-1.16 to 0.48) | -0.27 (-0.74 to 0.21)         | -0.23 (-0.82 to 0.36) | -0.10 (-0.63 to 0.43) | -0.09 (-0.52 to 0.34) | <b>Fluphenazine</b>   | NA                    | NA                    | NA                            | -0.15 (-1.03 to 0.74)         |
| -0.71 (-1.68 to 0.25) | -0.51 (-1.04 to 0.01)         | -0.44 (-1.30 to 0.43) | -0.39 (-1.25 to 0.46) | -0.32 (-0.80 to 0.16)         | -0.28 (-0.93 to 0.36) | -0.16 (-0.75 to 0.43) | -0.15 (-0.69 to 0.40) | -0.06 (-0.73 to 0.62) | <b>Sertindole</b>     | NA                    | NA                            | NA                            |
| -0.70 (-1.48 to 0.07) | <b>-0.50 (-0.76 to -0.25)</b> | -0.43 (-1.16 to 0.31) | -0.38 (-1.11 to 0.35) | -0.31 (-0.63 to 0.01)         | -0.27 (-0.64 to 0.10) | -0.15 (-0.53 to 0.24) | -0.14 (-0.45 to 0.18) | -0.04 (-0.55 to 0.46) | 0.01 (-0.57 to 0.59)  | <b>Chlorpromazine</b> | NA                            | -0.22 (-0.56 to 0.13)         |
| -0.73 (-1.55 to 0.09) | <b>-0.53 (-0.82 to -0.24)</b> | -0.45 (-1.20 to 0.30) | -0.41 (-1.13 to 0.31) | <b>-0.34 (-0.67 to -0.01)</b> | -0.30 (-0.73 to 0.13) | -0.17 (-0.55 to 0.20) | -0.16 (-0.46 to 0.14) | -0.07 (-0.56 to 0.42) | -0.02 (-0.60 to 0.56) | -0.03 (-0.31 to 0.25) | <b>Quetiapine</b>             | NA                            |

Treatments are presented in order of efficacy ranking. Results of the network meta-analysis are reported in the left lower half and results of pairwise meta-analyses in the right upper half. Each cell provides the effect estimate and the corresponding 95% credible interval (95% CI) of a comparison (left lower half: treatment in column versus treatment in row; right upper half: treatment in row versus treatment in column). The type of effect size measure is standardized mean difference (SMD). Bold results indicate 95% CI excluding no effect. NA=not available.

### 11.11 Excluding off-label dose olanzapine (>20mg/d)

Number of studies:  $k = 37$

Number of pairwise comparisons:  $m = 39$

Number of treatments:  $n = 12$

Number of designs:  $d = 18$

#### Network plot

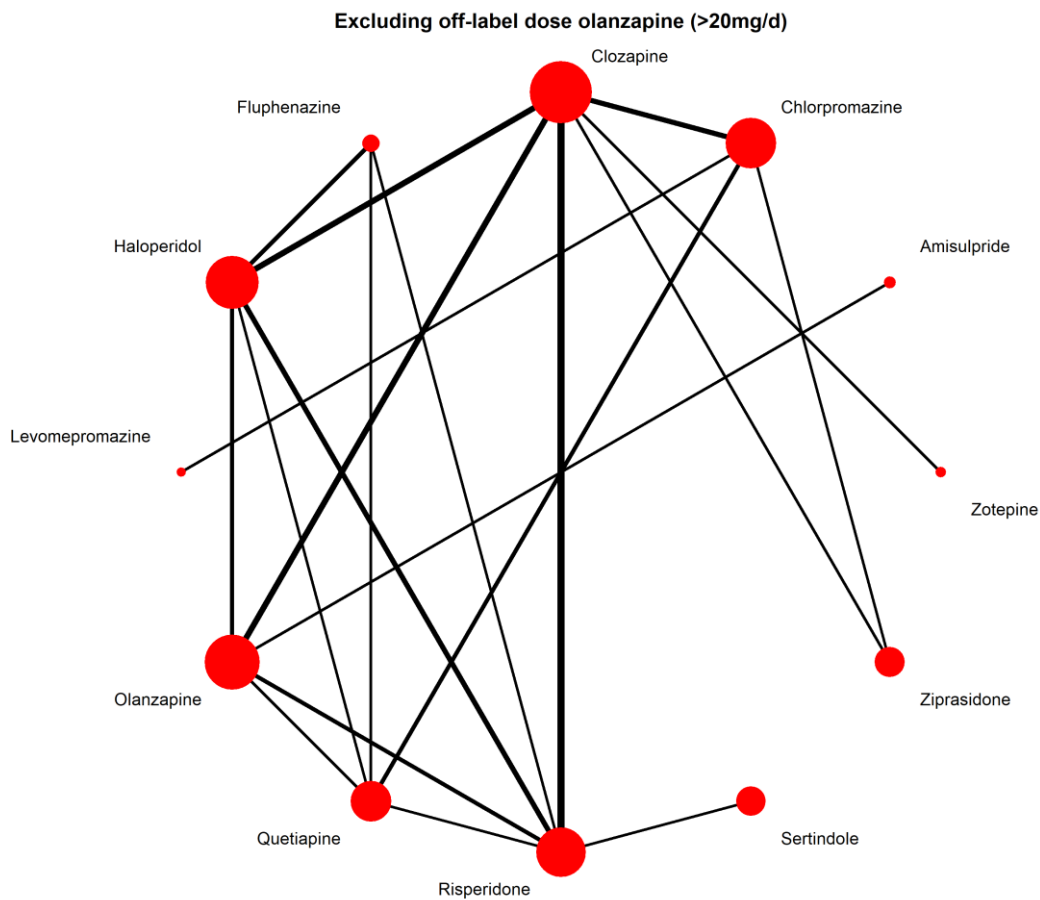

*Lines link treatments with direct comparisons in trials; thickness of lines corresponds to the number of trials evaluating the comparison; size of the nodes corresponds to the number of participants assigned to the treatment.*

| $\tau$ | P-value | Inconsistency loop (%) |
|--------|---------|------------------------|
| 0.1874 | 0.0001  | 12.5                   |

### Forest-plot of results of network meta-analysis for antipsychotic drugs versus clozapine

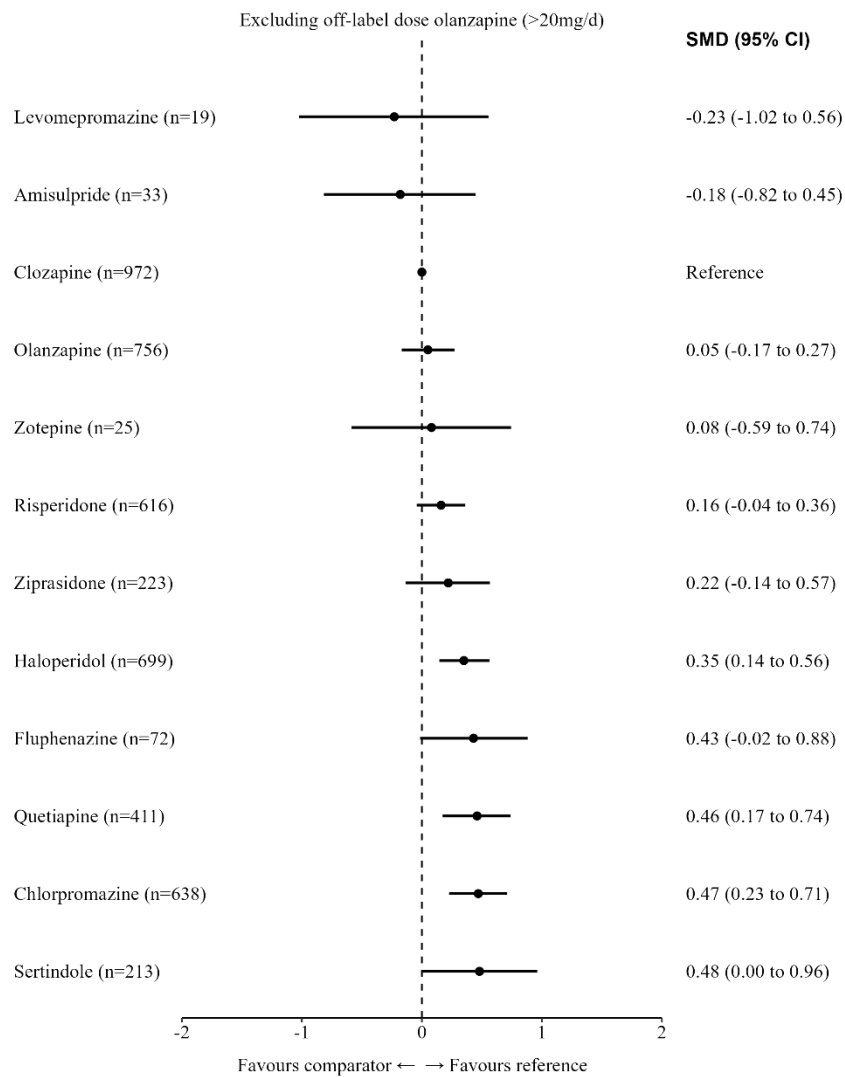

Effect sizes, measured as standardized mean difference (SMD), are from the network meta-analysis. Order of treatments is according to the mean effect size. Reference is clozapine. The direction of the effect is indicated below the x-axis.

### League table

|                       |                       |                               |                               |                       |                               |                       |                       |                       |                       |                       |                               |
|-----------------------|-----------------------|-------------------------------|-------------------------------|-----------------------|-------------------------------|-----------------------|-----------------------|-----------------------|-----------------------|-----------------------|-------------------------------|
| Amisulpride           | NA                    | NA                            | -0.24 (-0.83 to 0.36)         | NA                    | NA                            | NA                    | NA                    | NA                    | NA                    | NA                    | NA                            |
| 0.05 (-0.96 to 1.05)  | Levomepromazine       | NA                            | NA                            | NA                    | NA                            | NA                    | NA                    | NA                    | NA                    | NA                    | -0.70 (-1.45 to 0.05)         |
| -0.18 (-0.82 to 0.45) | -0.23 (-1.02 to 0.56) | Clozapine                     | -0.06 (-0.38 to 0.26)         | -0.08 (-0.74 to 0.59) | -0.07 (-0.33 to 0.19)         | 0.02 (-0.47 to 0.51)  | -0.26 (-0.56 to 0.03) | NA                    | NA                    | NA                    | <b>-0.78 (-1.08 to -0.47)</b> |
| -0.24 (-0.83 to 0.36) | -0.29 (-1.10 to 0.53) | -0.05 (-0.27 to 0.17)         | Olanzapine                    | NA                    | -0.21 (-0.58 to 0.16)         | NA                    | -0.35 (-0.72 to 0.03) | NA                    | NA                    | 0.09 (-0.63 to 0.82)  | NA                            |
| -0.26 (-1.18 to 0.66) | -0.31 (-1.34 to 0.72) | -0.08 (-0.74 to 0.59)         | -0.03 (-0.73 to 0.67)         | Zotepine              | NA                            | NA                    | NA                    | NA                    | NA                    | NA                    | NA                            |
| -0.34 (-0.98 to 0.30) | -0.39 (-1.20 to 0.42) | -0.16 (-0.36 to 0.04)         | -0.11 (-0.35 to 0.13)         | -0.08 (-0.78 to 0.61) | Risperidone                   | NA                    | -0.16 (-0.59 to 0.26) | 0.02 (-0.83 to 0.87)  | -0.32 (-0.76 to 0.12) | -0.12 (-0.99 to 0.74) | NA                            |
| -0.40 (-1.12 to 0.32) | -0.45 (-1.27 to 0.38) | -0.22 (-0.57 to 0.14)         | -0.16 (-0.57 to 0.24)         | -0.14 (-0.89 to 0.62) | -0.06 (-0.46 to 0.34)         | Ziprasidone           | NA                    | NA                    | NA                    | NA                    | -0.07 (-0.50 to 0.36)         |
| -0.54 (-1.18 to 0.10) | -0.59 (-1.39 to 0.22) | <b>-0.35 (-0.56 to -0.14)</b> | <b>-0.30 (-0.54 to -0.06)</b> | -0.28 (-0.97 to 0.42) | -0.19 (-0.43 to 0.04)         | -0.14 (-0.53 to 0.26) | Haloperidol           | -0.17 (-0.67 to 0.32) | NA                    | 0.14 (-0.29 to 0.58)  | NA                            |
| -0.62 (-1.37 to 0.14) | -0.67 (-1.56 to 0.23) | -0.43 (-0.88 to 0.02)         | -0.38 (-0.85 to 0.08)         | -0.35 (-1.16 to 0.45) | -0.27 (-0.73 to 0.18)         | -0.22 (-0.78 to 0.34) | -0.08 (-0.50 to 0.34) | Fluphenazine          | NA                    | -0.15 (-1.01 to 0.72) | NA                            |
| -0.66 (-1.44 to 0.11) | -0.71 (-1.63 to 0.21) | -0.48 (-0.96 to 0.00)         | -0.43 (-0.93 to 0.07)         | -0.40 (-1.22 to 0.42) | -0.32 (-0.76 to 0.12)         | -0.26 (-0.86 to 0.33) | -0.13 (-0.62 to 0.37) | -0.05 (-0.68 to 0.58) | Sertindole            | NA                    | NA                            |
| -0.64 (-1.31 to 0.03) | -0.69 (-1.49 to 0.11) | <b>-0.46 (-0.74 to -0.17)</b> | <b>-0.40 (-0.72 to -0.09)</b> | -0.38 (-1.10 to 0.35) | -0.30 (-0.61 to 0.02)         | -0.24 (-0.65 to 0.16) | -0.10 (-0.39 to 0.18) | -0.02 (-0.50 to 0.45) | 0.02 (-0.52 to 0.56)  | Quetiapine            | 0.22 (-0.10 to 0.53)          |
| -0.65 (-1.32 to 0.02) | -0.70 (-1.45 to 0.05) | <b>-0.47 (-0.71 to -0.23)</b> | <b>-0.42 (-0.72 to -0.11)</b> | -0.39 (-1.10 to 0.32) | <b>-0.31 (-0.61 to -0.01)</b> | -0.25 (-0.59 to 0.09) | -0.11 (-0.40 to 0.18) | -0.04 (-0.52 to 0.45) | 0.01 (-0.52 to 0.54)  | -0.01 (-0.27 to 0.25) | Chlorpromazine                |

Treatments are presented in order of efficacy ranking. Results of the network meta-analysis are reported in the left lower half and results of pairwise meta-analyses in the right upper half. Each cell provides the effect estimate and the corresponding 95% credible interval (95% CI) of a comparison (left lower half: treatment in column versus treatment in row; right upper half: treatment in row versus treatment in column). The type of effect size measure is standardized mean difference (SMD). Bold results indicate 95% CI excluding no effect. NA=not available.

### 11.12 A most extreme sensitivity analysis including only situations in which clozapine may be most superior

In this sensitivity analysis, open-label studies, studies in which clozapine doses below 400mg/day, studies with intolerant patients and studies with low and intermediate cut-off stringency of criteria for treatment resistance were excluded.

Number of studies:  $k = 10$

Number of pairwise comparisons:  $m = 12$

Number of treatments:  $n = 10$

Number of designs:  $d = 9$

#### Network plot

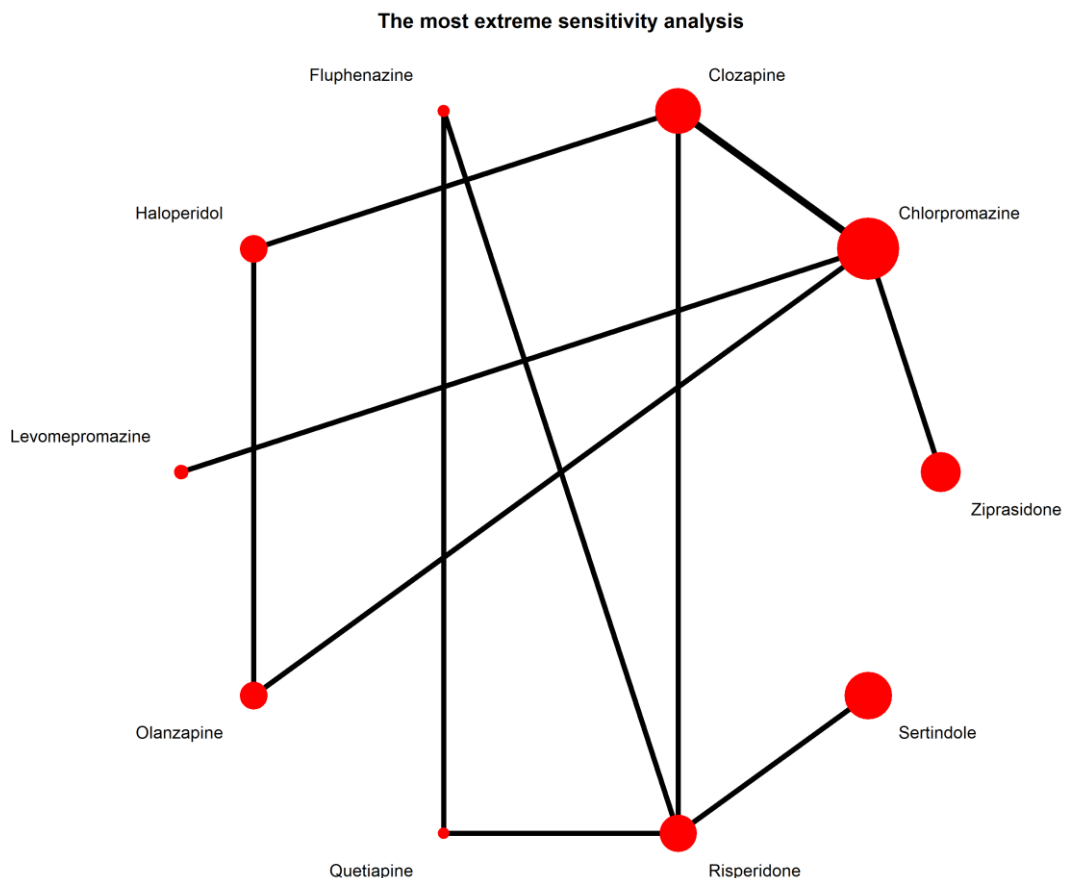

*Lines link treatments with direct comparisons in trials; thickness of lines corresponds to the number of trials evaluating the comparison; size of the nodes corresponds to the number of participants assigned to the treatment.*



| $\tau$ | P-value | Inconsistency loop (%) |
|--------|---------|------------------------|
| 0      | 0.2145  | 0                      |

### Forest-plot of results of network meta-analysis for antipsychotic drugs versus clozapine

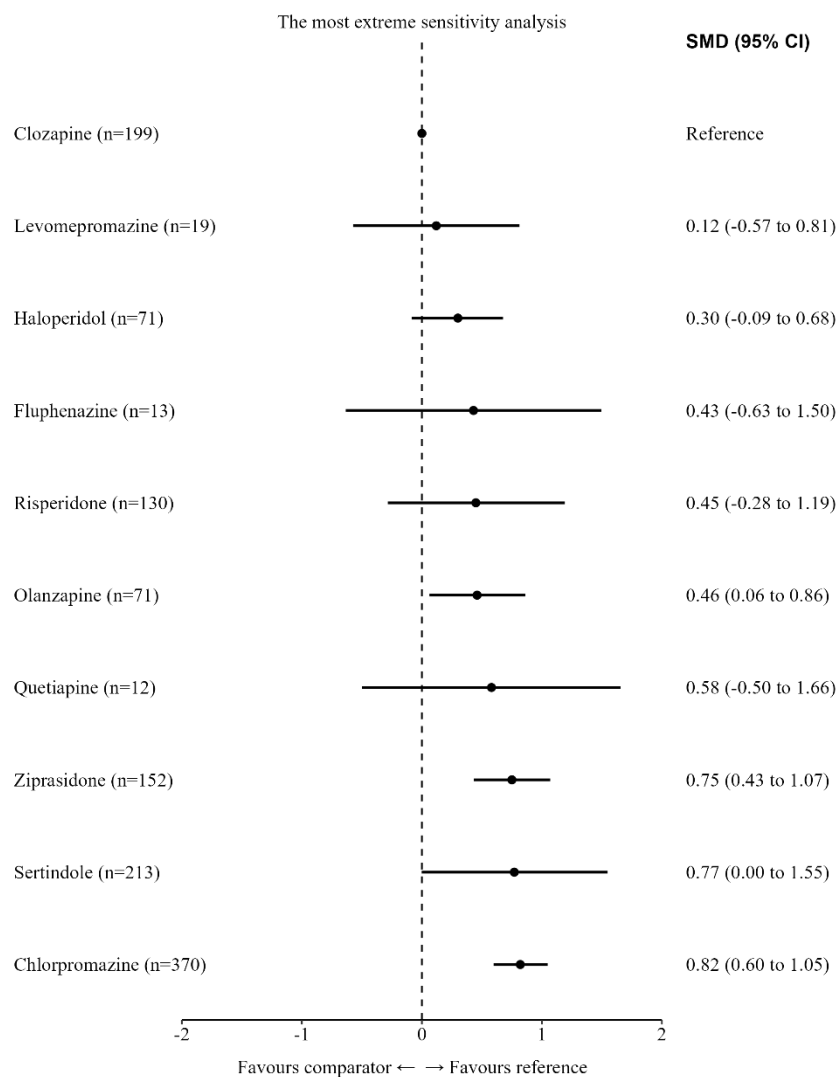

Effect sizes, measured as standardized mean difference (SMD), are from the network meta-analysis. Order of treatments is according to the mean effect size. Reference is clozapine. The direction of the effect is indicated below the x-axis.

### League table

|                               |                               |                               |                               |                       |                       |                       |                       |                               |                               |
|-------------------------------|-------------------------------|-------------------------------|-------------------------------|-----------------------|-----------------------|-----------------------|-----------------------|-------------------------------|-------------------------------|
| <b>Clozapine</b>              | NA                            | -0.14 (-0.59 to 0.31)         | -0.45 (-1.19 to 0.28)         | NA                    | NA                    | NA                    | NA                    | NA                            | <b>-0.86 (-1.10 to -0.63)</b> |
| -0.12 (-0.81 to 0.57)         | <b>Levomepromazine</b>        | NA                            | NA                            | NA                    | NA                    | NA                    | NA                    | NA                            | <b>-0.70 (-1.36 to -0.05)</b> |
| -0.30 (-0.68 to 0.09)         | -0.18 (-0.94 to 0.59)         | <b>Haloperidol</b>            | NA                            | NA                    | 0.02 (-0.48 to 0.51)  | NA                    | NA                    | NA                            | NA                            |
| -0.45 (-1.19 to 0.28)         | -0.33 (-1.35 to 0.68)         | -0.16 (-0.99 to 0.67)         | <b>Risperidone</b>            | 0.02 (-0.75 to 0.79)  | NA                    | -0.12 (-0.91 to 0.66) | NA                    | <b>-0.32 (-0.56 to -0.08)</b> | NA                            |
| -0.43 (-1.50 to 0.63)         | -0.31 (-1.58 to 0.96)         | -0.14 (-1.27 to 1.00)         | 0.02 (-0.75 to 0.79)          | <b>Fluphenazine</b>   | NA                    | -0.15 (-0.93 to 0.64) | NA                    | NA                            | NA                            |
| <b>-0.46 (-0.86 to -0.06)</b> | -0.34 (-1.10 to 0.41)         | -0.17 (-0.57 to 0.23)         | -0.01 (-0.85 to 0.83)         | -0.03 (-1.17 to 1.11) | <b>Olanzapine</b>     | NA                    | NA                    | NA                            | -0.22 (-0.65 to 0.22)         |
| -0.58 (-1.66 to 0.50)         | -0.46 (-1.74 to 0.82)         | -0.28 (-1.42 to 0.86)         | -0.12 (-0.91 to 0.66)         | -0.15 (-0.93 to 0.64) | -0.12 (-1.26 to 1.03) | <b>Quetiapine</b>     | NA                    | NA                            | NA                            |
| <b>-0.75 (-1.07 to -0.43)</b> | -0.63 (-1.32 to 0.06)         | -0.46 (-0.92 to 0.01)         | -0.30 (-1.10 to 0.50)         | -0.32 (-1.43 to 0.79) | -0.29 (-0.72 to 0.15) | -0.17 (-1.30 to 0.95) | <b>Ziprasidone</b>    | NA                            | -0.07 (-0.29 to 0.15)         |
| -0.77 (-1.55 to 0.00)         | -0.65 (-1.69 to 0.39)         | -0.48 (-1.34 to 0.38)         | <b>-0.32 (-0.56 to -0.08)</b> | -0.34 (-1.15 to 0.46) | -0.31 (-1.18 to 0.56) | -0.20 (-1.02 to 0.62) | -0.02 (-0.86 to 0.82) | <b>Sertindole</b>             | NA                            |
| <b>-0.82 (-1.05 to -0.60)</b> | <b>-0.70 (-1.36 to -0.05)</b> | <b>-0.53 (-0.93 to -0.12)</b> | -0.37 (-1.14 to 0.40)         | -0.39 (-1.48 to 0.70) | -0.36 (-0.73 to 0.01) | -0.24 (-1.35 to 0.86) | -0.07 (-0.29 to 0.15) | -0.05 (-0.86 to 0.76)         | <b>Chlorpromazine</b>         |

Treatments are presented in order of efficacy ranking. Results of the network meta-analysis are reported in the left lower half and results of pairwise meta-analyses in the right upper half. Each cell provides the effect estimate and the corresponding 95% credible interval (95% CI) of a comparison (left lower half: treatment in column versus treatment in row; right upper half: treatment in row versus treatment in column). The type of effect size measure is standardized mean difference (SMD). Bold results indicate 95% CI excluding no effect. NA=not available.

## 12 Results of the subgroup analyses of the primary outcome

### 12.1 The criteria of treatment-resistant definitions

#### 12.1.1 The criteria of treatment-resistant definitions

The criteria are a modified version of the previous network meta-analysis from Samara et al.<sup>81</sup> Additionally, we did a subgroup analysis using Samara's criteria and presented the results in Appendix 12.1.2.

##### **a Low cut-off**

###### **Definition**

Non-response or intolerant to antipsychotics without a specification and studies that do not meet intermediate or high cut-off criteria.

Number of studies:  $k = 19$

Number of pairwise comparisons:  $m = 29$

Number of treatments:  $n = 10$

Number of designs:  $d = 13$

## Network plot

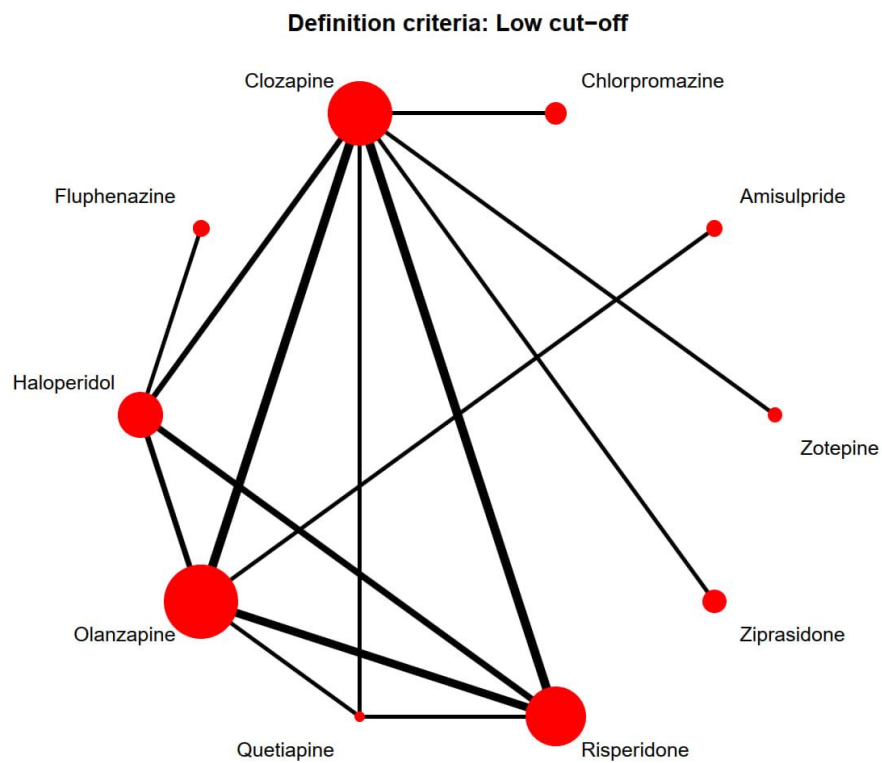

Lines link treatments with direct comparisons in trials; thickness of lines corresponds to the number of trials evaluating the comparison; size of the nodes corresponds to the number of participants assigned to the treatment.

| $\tau$ | P-value | Inconsistency loop (%) |
|--------|---------|------------------------|
| 0.1235 | 0.1370  | 11.11                  |

**Forest-plot of results of network meta-analysis for antipsychotic drugs versus clozapine**

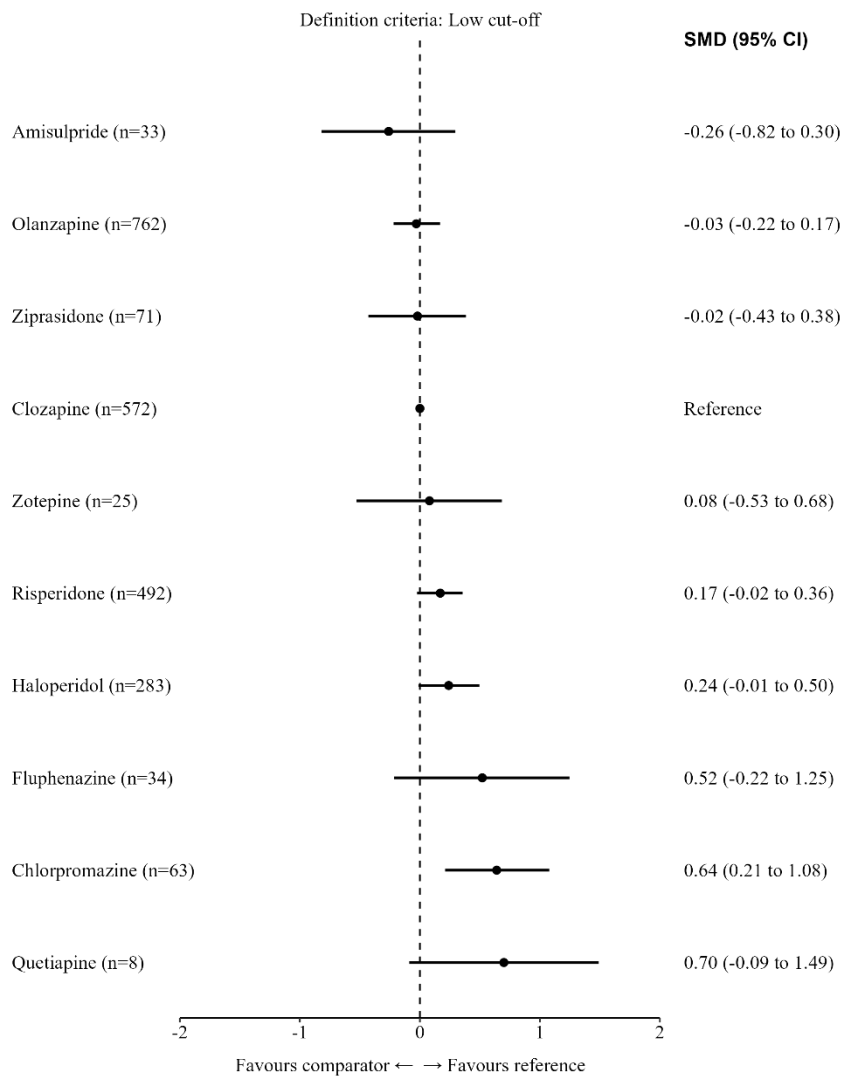

*Effect sizes, measured as standardized mean difference (SMD), are from the network meta-analysis. Order of treatments is according to the mean effect size. Reference is clozapine. The direction of the effect is indicated below the x-axis.*

### League table

|                               |                               |                               |                               |                       |                       |                               |                       |                               |                               |
|-------------------------------|-------------------------------|-------------------------------|-------------------------------|-----------------------|-----------------------|-------------------------------|-----------------------|-------------------------------|-------------------------------|
| <b>Amisulpride</b>            | -0.24 (-0.76 to 0.29)         | NA                            | NA                            | NA                    | NA                    | NA                            | NA                    | NA                            | NA                            |
| -0.24 (-0.76 to 0.29)         | <b>Olanzapine</b>             | -0.03 (-0.27 to 0.20)         | NA                            | NA                    | -0.23 (-0.48 to 0.01) | <b>-0.29 (-0.55 to -0.03)</b> | NA                    | -0.38 (-1.34 to 0.59)         | NA                            |
| -0.26 (-0.82 to 0.30)         | -0.03 (-0.22 to 0.17)         | <b>Clozapine</b>              | 0.02 (-0.38 to 0.43)          | -0.08 (-0.68 to 0.53) | -0.11 (-0.34 to 0.11) | -0.09 (-0.54 to 0.35)         | NA                    | <b>-1.01 (-1.84 to -0.18)</b> | <b>-0.64 (-1.08 to -0.21)</b> |
| -0.24 (-0.93 to 0.45)         | -0.00 (-0.45 to 0.45)         | 0.02 (-0.38 to 0.43)          | <b>Ziprasidone</b>            | NA                    | NA                    | NA                            | NA                    | NA                            | NA                            |
| -0.34 (-1.16 to 0.48)         | -0.10 (-0.74 to 0.53)         | -0.08 (-0.68 to 0.53)         | -0.10 (-0.83 to 0.63)         | <b>Zotepine</b>       | NA                    | NA                            | NA                    | NA                            | NA                            |
| -0.43 (-0.99 to 0.13)         | -0.19 (-0.38 to 0.00)         | -0.17 (-0.36 to 0.02)         | -0.19 (-0.64 to 0.26)         | -0.09 (-0.72 to 0.55) | <b>Risperidone</b>    | -0.07 (-0.40 to 0.26)         | NA                    | 0.06 (-1.03 to 1.14)          | NA                            |
| -0.50 (-1.07 to 0.06)         | <b>-0.27 (-0.49 to -0.05)</b> | -0.24 (-0.50 to 0.01)         | -0.26 (-0.74 to 0.21)         | -0.16 (-0.82 to 0.49) | -0.08 (-0.32 to 0.16) | <b>Haloperidol</b>            | -0.27 (-0.96 to 0.41) | NA                            | NA                            |
| -0.78 (-1.67 to 0.11)         | -0.54 (-1.26 to 0.18)         | -0.52 (-1.25 to 0.22)         | -0.54 (-1.37 to 0.30)         | -0.44 (-1.39 to 0.51) | -0.35 (-1.08 to 0.38) | -0.27 (-0.96 to 0.41)         | <b>Fluphenazine</b>   | NA                            | NA                            |
| <b>-0.96 (-1.92 to -0.01)</b> | -0.73 (-1.52 to 0.07)         | -0.70 (-1.49 to 0.09)         | -0.72 (-1.61 to 0.16)         | -0.62 (-1.62 to 0.37) | -0.53 (-1.33 to 0.26) | -0.46 (-1.28 to 0.36)         | -0.19 (-1.25 to 0.88) | <b>Quetiapine</b>             | NA                            |
| <b>-0.91 (-1.61 to -0.20)</b> | <b>-0.67 (-1.14 to -0.20)</b> | <b>-0.64 (-1.08 to -0.21)</b> | <b>-0.67 (-1.26 to -0.07)</b> | -0.57 (-1.31 to 0.18) | -0.48 (-0.95 to 0.00) | -0.40 (-0.90 to 0.10)         | -0.13 (-0.98 to 0.72) | 0.06 (-0.84 to 0.96)          | <b>Chlorpromazine</b>         |

Treatments are presented in order of efficacy ranking. Results of the network meta-analysis are reported in the left lower half and results of pairwise meta-analyses in the right upper half. Each cell provides the effect estimate and the corresponding 95% credible interval (95% CI) of a comparison (left lower half: treatment in column versus treatment in row; right upper half: treatment in row versus treatment in column). The type of effect size measure is standardized mean difference (SMD). Bold results indicate 95% CI excluding no effect. NA=not available.

## **b Intermediate cut-off**

### **Definition**

Failure of response to at least 2 trials with antipsychotics at dosage in the therapeutic range and adequate duration and persistent at least moderate symptoms assessed with standardized rating scales.

Number of studies:  $k = 15$

Number of pairwise comparisons:  $m = 15$

Number of treatments:  $n = 7$

Number of designs:  $d = 9$

### **Network plot**

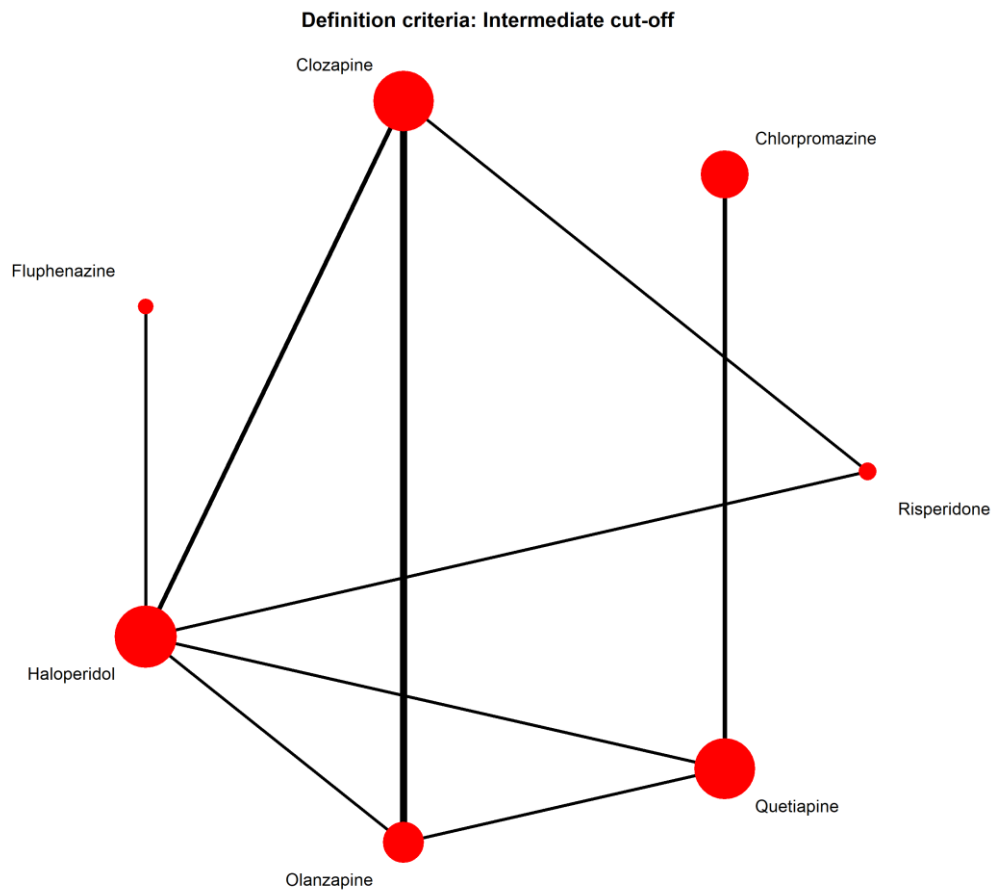

*Lines link treatments with direct comparisons in trials; thickness of lines corresponds to the number of trials evaluating the comparison; size of the nodes corresponds to the number of participants assigned to the treatment.*

| $\tau$ | P-value | Inconsistency loop (%) |
|--------|---------|------------------------|
| 0      | 0.5108  | 0                      |

### Forest-plot of results of network meta-analysis for antipsychotic drugs versus clozapine

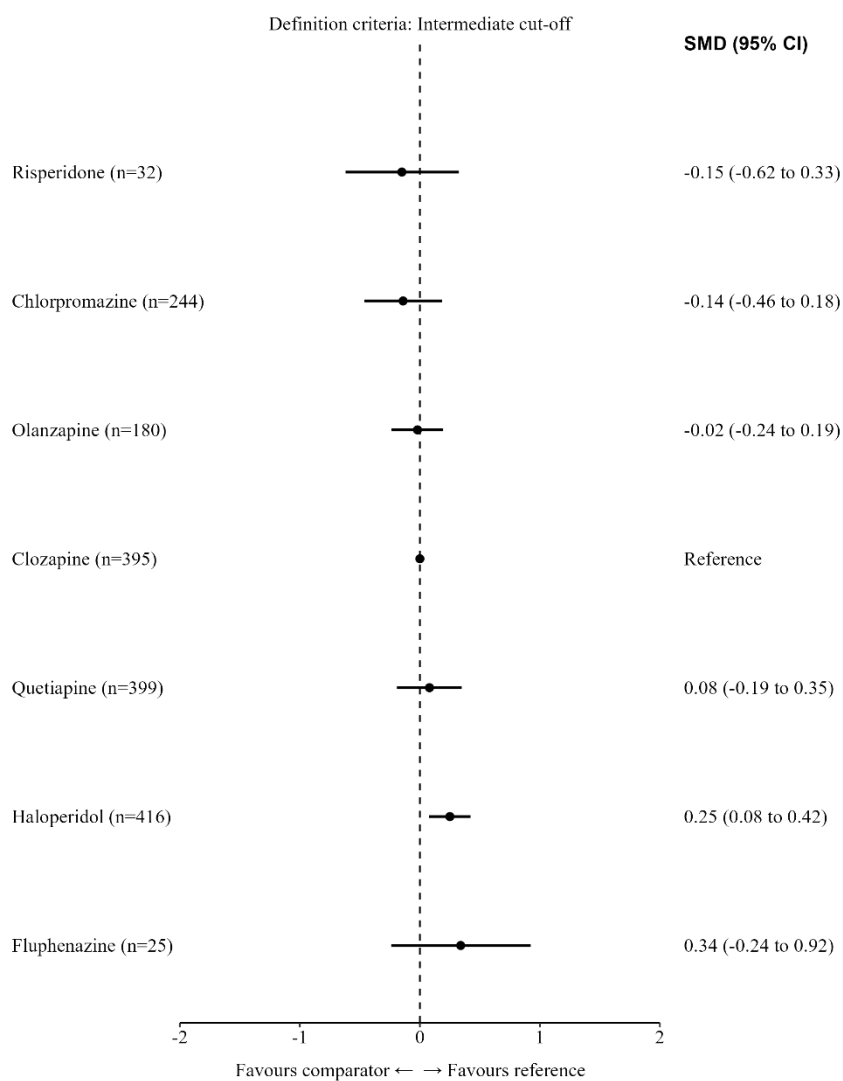

Effect sizes, measured as standardized mean difference (SMD), are from the network meta-analysis. Order of treatments is according to the mean effect size. Reference is clozapine. The direction of the effect is indicated below the x-axis.



### League table

|                               |                       |                               |                               |                               |                      |                               |
|-------------------------------|-----------------------|-------------------------------|-------------------------------|-------------------------------|----------------------|-------------------------------|
| <b>Chlorpromazine</b>         | NA                    | NA                            | NA                            | <b>-0.22 (-0.40 to -0.04)</b> | NA                   | NA                            |
| 0.01 (-0.55 to 0.57)          | <b>Risperidone</b>    | NA                            | -0.03 (-0.58 to 0.52)         | NA                            | NA                   | -0.72 (-1.62 to 0.19)         |
| -0.12 (-0.48 to 0.24)         | -0.13 (-0.64 to 0.39) | <b>Olanzapine</b>             | -0.01 (-0.25 to 0.22)         | 0.09 (-0.53 to 0.72)          | NA                   | -0.73 (-1.55 to 0.10)         |
| -0.14 (-0.46 to 0.18)         | -0.15 (-0.62 to 0.33) | -0.02 (-0.24 to 0.19)         | <b>Clozapine</b>              | NA                            | NA                   | <b>-0.23 (-0.41 to -0.04)</b> |
| <b>-0.22 (-0.40 to -0.04)</b> | -0.23 (-0.76 to 0.31) | -0.10 (-0.41 to 0.21)         | -0.08 (-0.35 to 0.19)         | <b>Quetiapine</b>             | NA                   | -0.14 (-0.38 to 0.09)         |
| -0.48 (-1.10 to 0.14)         | -0.49 (-1.23 to 0.25) | -0.36 (-0.97 to 0.25)         | -0.34 (-0.92 to 0.24)         | -0.26 (-0.86 to 0.33)         | <b>Fluphenazine</b>  | 0.09 (-0.46 to 0.65)          |
| <b>-0.39 (-0.67 to -0.10)</b> | -0.40 (-0.88 to 0.09) | <b>-0.27 (-0.53 to -0.01)</b> | <b>-0.25 (-0.42 to -0.08)</b> | -0.17 (-0.39 to 0.05)         | 0.09 (-0.46 to 0.65) | <b>Haloperidol</b>            |

Treatments are presented in order of efficacy ranking. Results of the network meta-analysis are reported in the left lower half and results of pairwise meta-analyses in the right upper half. Each cell provides the effect estimate and the corresponding 95% credible interval (95% CI) of a comparison (left lower half: treatment in column versus treatment in row; right upper half: treatment in row versus treatment in column). The type of effect size measure is standardized mean difference (SMD). Bold results indicate 95% CI excluding no effect. NA=not available.

### c High cut-off

#### Definition

Failure of response to at least two antipsychotic drug trials at dosage in the therapeutic range and adequate duration and at least one of them was prospective, also persistent at least moderate symptoms assessed with standardized rating scales at an assessment at the end of the prospective trial.

Number of studies:  $k = 11$

Number of pairwise comparisons:  $m = 13$

Number of treatments:  $n = 10$

Number of designs:  $d = 9$

#### Network plot

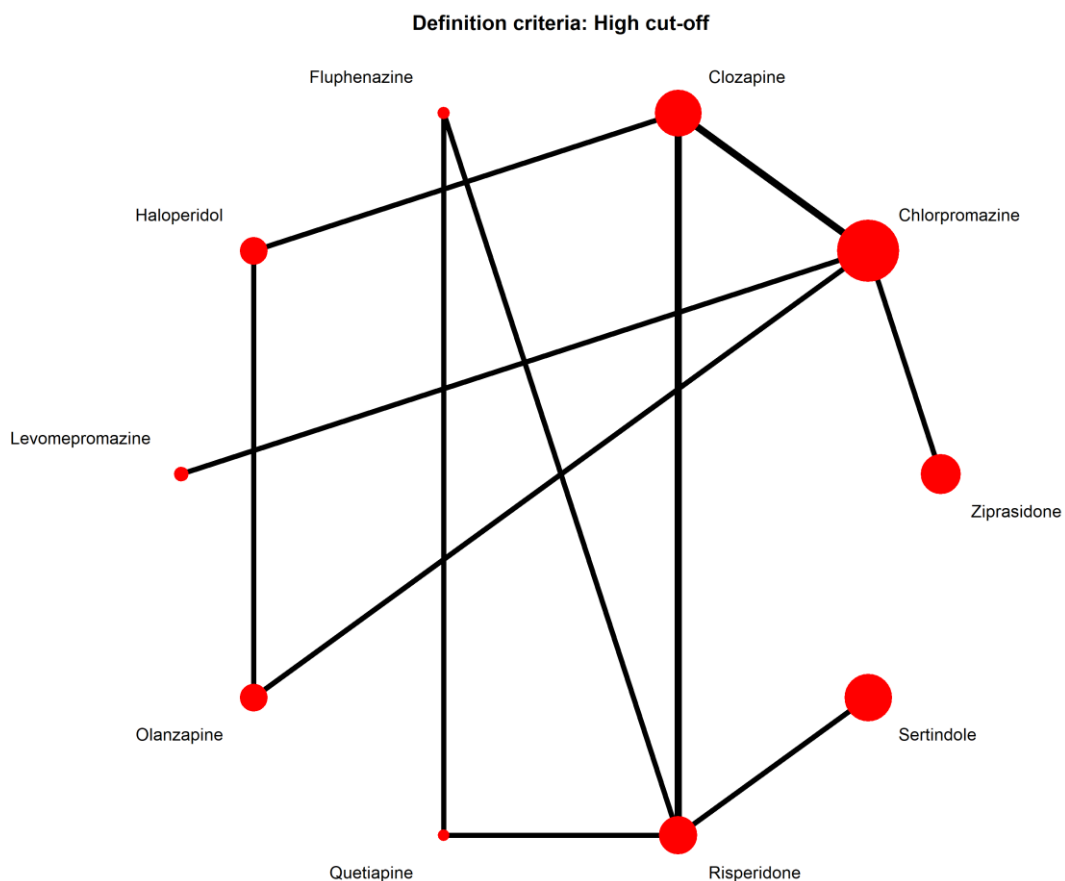

*Lines link treatments with direct comparisons in trials; thickness of lines corresponds to the number of trials evaluating the comparison; size of the nodes corresponds to the number of participants assigned to the treatment.*

| $\tau$ | P-value | Inconsistency loop (%) |
|--------|---------|------------------------|
| 0.2199 | 0.4439  | 0                      |

**Forest-plot of results of network meta-analysis for antipsychotic drugs versus clozapine**

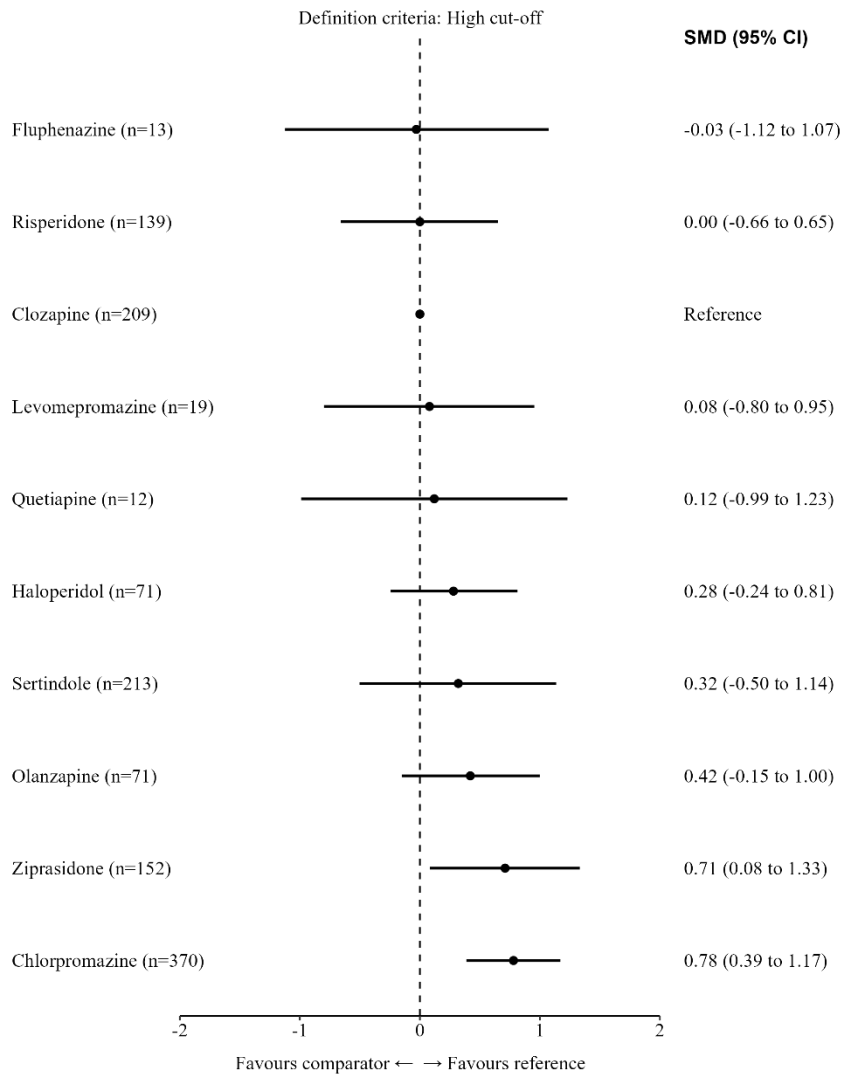

Effect sizes, measured as standardized mean difference (SMD), are from the network meta-analysis. Order of treatments is according to the mean effect size. Reference is clozapine. The direction of the effect is indicated below the x-axis.

### League table

|                               |                               |                       |                        |                       |                       |                       |                       |                       |                               |
|-------------------------------|-------------------------------|-----------------------|------------------------|-----------------------|-----------------------|-----------------------|-----------------------|-----------------------|-------------------------------|
| <b>Clozapine</b>              | 0.00 (-0.65 to 0.66)          | NA                    | NA                     | NA                    | -0.14 (-0.77 to 0.49) | NA                    | NA                    | NA                    | <b>-0.84 (-1.26 to -0.42)</b> |
| 0.00 (-0.65 to 0.66)          | <b>Risperidone</b>            | 0.02 (-0.86 to 0.90)  | NA                     | -0.12 (-1.02 to 0.77) | NA                    | -0.32 (-0.81 to 0.17) | NA                    | NA                    | NA                            |
| 0.03 (-1.07 to 1.12)          | 0.02 (-0.86 to 0.90)          | <b>Fluphenazine</b>   | NA                     | -0.15 (-1.04 to 0.75) | NA                    | NA                    | NA                    | NA                    | NA                            |
| -0.08 (-0.95 to 0.80)         | -0.08 (-1.18 to 1.01)         | -0.10 (-1.51 to 1.30) | <b>Levomepromazine</b> | NA                    | NA                    | NA                    | NA                    | NA                    | -0.70 (-1.49 to 0.08)         |
| -0.12 (-1.23 to 0.99)         | -0.12 (-1.02 to 0.77)         | -0.15 (-1.04 to 0.75) | -0.04 (-1.46 to 1.37)  | <b>Quetiapine</b>     | NA                    | NA                    | NA                    | NA                    | NA                            |
| -0.28 (-0.81 to 0.24)         | -0.29 (-1.13 to 0.55)         | -0.31 (-1.53 to 0.91) | -0.21 (-1.18 to 0.77)  | -0.16 (-1.39 to 1.07) | <b>Haloperidol</b>    | NA                    | 0.02 (-0.64 to 0.68)  | NA                    | NA                            |
| -0.32 (-1.14 to 0.50)         | -0.32 (-0.81 to 0.17)         | -0.34 (-1.35 to 0.67) | -0.24 (-1.44 to 0.96)  | -0.20 (-1.22 to 0.83) | -0.03 (-1.01 to 0.94) | <b>Sertindole</b>     | NA                    | NA                    | NA                            |
| -0.42 (-1.00 to 0.15)         | -0.43 (-1.30 to 0.44)         | -0.45 (-1.69 to 0.79) | -0.35 (-1.29 to 0.60)  | -0.30 (-1.55 to 0.95) | -0.14 (-0.68 to 0.40) | -0.11 (-1.11 to 0.89) | <b>Olanzapine</b>     | NA                    | -0.22 (-0.83 to 0.40)         |
| <b>-0.71 (-1.33 to -0.08)</b> | -0.71 (-1.62 to 0.19)         | -0.73 (-2.00 to 0.53) | -0.63 (-1.55 to 0.29)  | -0.59 (-1.86 to 0.68) | -0.42 (-1.18 to 0.33) | -0.39 (-1.42 to 0.64) | -0.28 (-1.00 to 0.43) | <b>Ziprasidone</b>    | -0.07 (-0.56 to 0.41)         |
| <b>-0.78 (-1.17 to -0.39)</b> | <b>-0.78 (-1.55 to -0.02)</b> | -0.81 (-1.97 to 0.36) | -0.70 (-1.49 to 0.08)  | -0.66 (-1.84 to 0.52) | -0.49 (-1.07 to 0.08) | -0.46 (-1.37 to 0.44) | -0.35 (-0.88 to 0.17) | -0.07 (-0.56 to 0.41) | <b>Chlorpromazine</b>         |

Treatments are presented in order of efficacy ranking. Results of the network meta-analysis are reported in the left lower half and results of pairwise meta-analyses in the right upper half. Each cell provides the effect estimate and the corresponding 95% credible interval (95% CI) of a comparison (left lower half: treatment in column versus treatment in row; right upper half: treatment in row versus treatment in column). The type of effect size measure is standardized mean difference (SMD). Bold results indicate 95% CI excluding no effect. NA=not available.

### 12.1.2 The criteria from Samara et al<sup>81</sup>

#### a No response to 1 previous antipsychotic

Number of studies:  $k = 11$

Number of pairwise comparisons:  $m = 21$

Number of treatments:  $n = 7$

Number of designs:  $d = 9$

#### Network plot

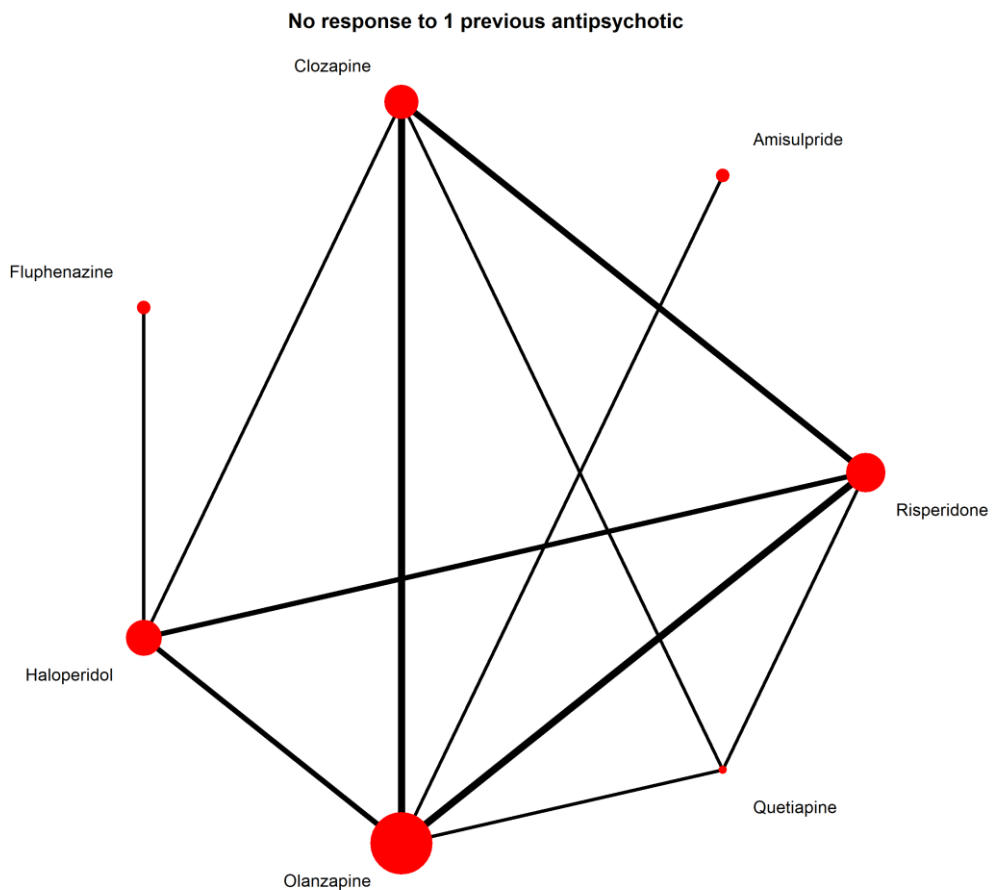

*Lines link treatments with direct comparisons in trials; thickness of lines corresponds to the number of trials evaluating the comparison; size of the nodes corresponds to the number of participants assigned to the treatment.*

| $\tau$        | P-value       | Inconsistency loop (%) |
|---------------|---------------|------------------------|
| <b>0.1111</b> | <b>0.1312</b> | <b>22.22</b>           |

**Forest-plot of results of network meta-analysis for antipsychotic drugs versus clozapine**

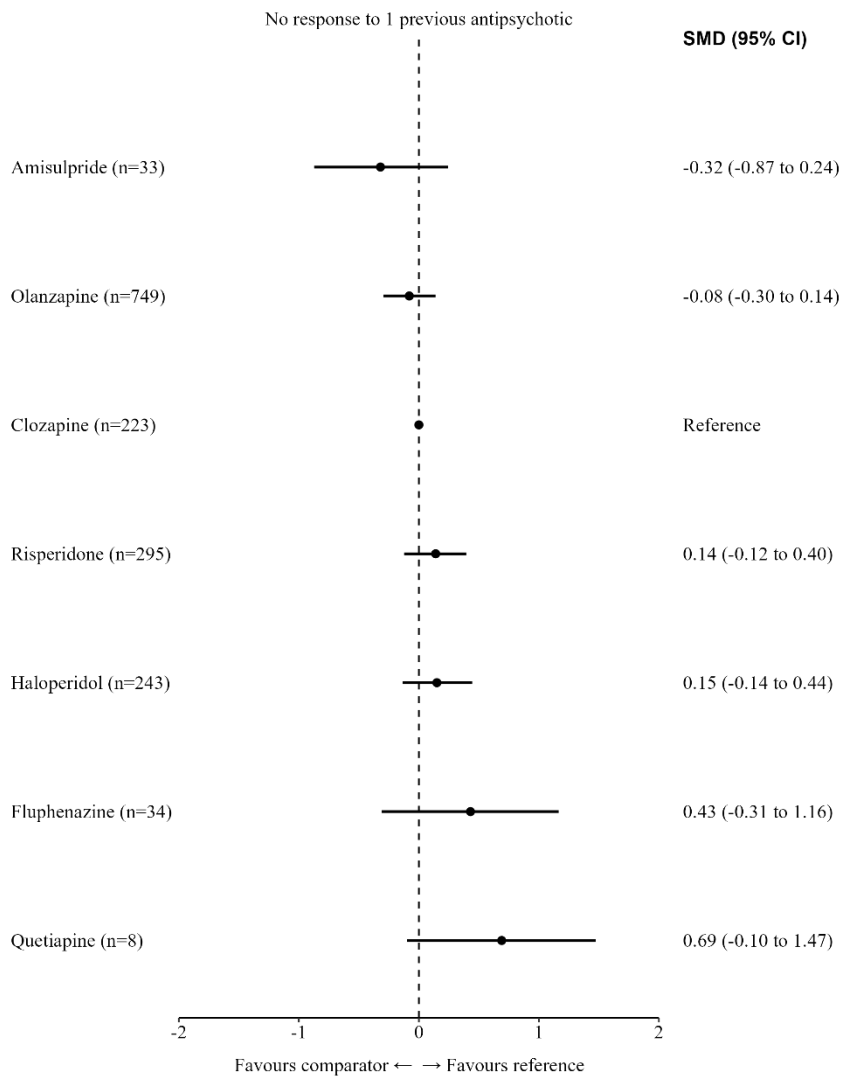

*Effect sizes, measured as standardized mean difference (SMD), are from the network meta-analysis. Order of treatments is according to the mean effect size. Reference is clozapine. The direction of the effect is indicated below the x-axis.*

### League table

|                               |                               |                       |                       |                               |                       |                               |
|-------------------------------|-------------------------------|-----------------------|-----------------------|-------------------------------|-----------------------|-------------------------------|
| <b>Amisulpride</b>            | -0.24 (-0.75 to 0.28)         | NA                    | NA                    | NA                            | NA                    | NA                            |
| -0.24 (-0.75 to 0.28)         | <b>Olanzapine</b>             | -0.07 (-0.31 to 0.17) | -0.23 (-0.47 to 0.00) | <b>-0.29 (-0.54 to -0.04)</b> | NA                    | -0.38 (-1.34 to 0.58)         |
| -0.32 (-0.87 to 0.24)         | -0.08 (-0.30 to 0.14)         | <b>Clozapine</b>      | -0.04 (-0.39 to 0.31) | 0.12 (-0.38 to 0.61)          | NA                    | <b>-1.01 (-1.83 to -0.19)</b> |
| -0.45 (-1.01 to 0.10)         | <b>-0.21 (-0.42 to -0.01)</b> | -0.14 (-0.40 to 0.12) | <b>Risperidone</b>    | -0.03 (-0.42 to 0.36)         | NA                    | 0.06 (-1.02 to 1.14)          |
| -0.47 (-1.03 to 0.09)         | <b>-0.23 (-0.46 to -0.01)</b> | -0.15 (-0.44 to 0.14) | -0.02 (-0.29 to 0.25) | <b>Haloperidol</b>            | -0.27 (-0.95 to 0.40) | NA                            |
| -0.74 (-1.62 to 0.14)         | -0.51 (-1.22 to 0.21)         | -0.43 (-1.16 to 0.31) | -0.29 (-1.02 to 0.44) | -0.27 (-0.95 to 0.40)         | <b>Fluphenazine</b>   | NA                            |
| <b>-1.00 (-1.95 to -0.06)</b> | -0.77 (-1.56 to 0.03)         | -0.69 (-1.47 to 0.10) | -0.55 (-1.36 to 0.25) | -0.53 (-1.35 to 0.29)         | -0.26 (-1.32 to 0.80) | <b>Quetiapine</b>             |

Treatments are presented in order of efficacy ranking. Results of the network meta-analysis are reported in the left lower half and results of pairwise meta-analyses in the right upper half. Each cell provides the effect estimate and the corresponding 95% credible interval (95% CI) of a comparison (left lower half: treatment in column versus treatment in row; right upper half: treatment in row versus treatment in column). The type of effect size measure is standardized mean difference (SMD). Bold results indicate 95% CI excluding no effect. NA=not available.

**b No response to at least 2 retrospective periods of antipsychotic treatment**

Number of studies:  $k = 20$

Number of pairwise comparisons:  $m = 20$

Number of treatments:  $n = 9$

Number of designs:  $d = 11$

**Network plot**

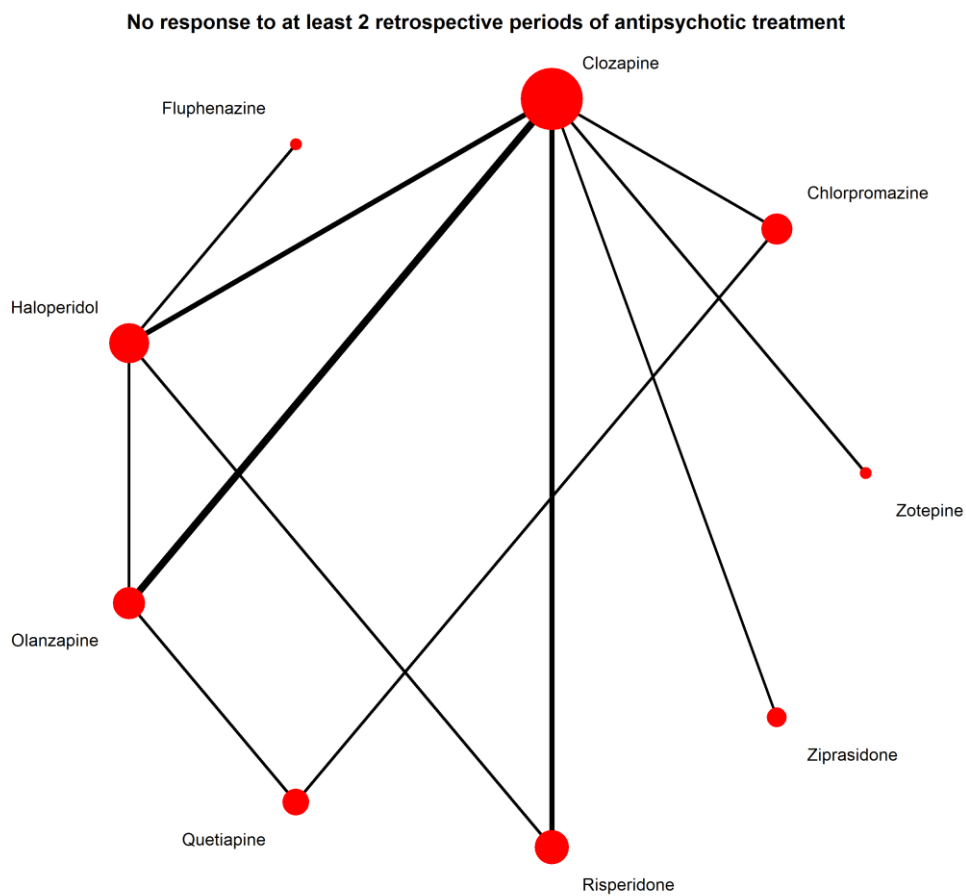

*Lines link treatments with direct comparisons in trials; thickness of lines corresponds to the number of trials evaluating the comparison; size of the nodes corresponds to the number of participants assigned to the treatment.*

| $\tau$ | P-value | Inconsistency loop (%) |
|--------|---------|------------------------|
| 0.1506 | 0.2017  | 0.375                  |



**Forest-plot of results of network meta-analysis for antipsychotic drugs versus clozapine**

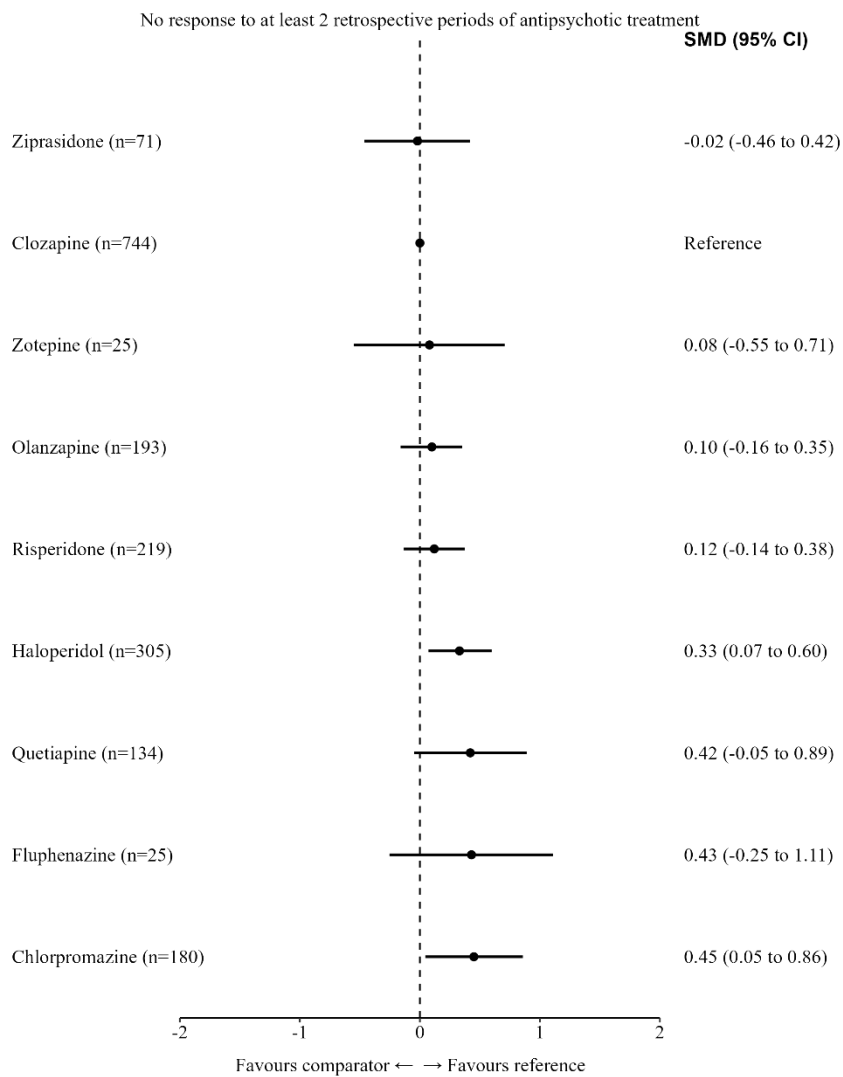

*Effect sizes, measured as standardized mean difference (SMD), are from the network meta-analysis. Order of treatments is according to the mean effect size. Reference is clozapine. The direction of the effect is indicated below the x-axis.*

**League table**

|                               |                       |                       |                       |                       |                       |                       |                       |                               |
|-------------------------------|-----------------------|-----------------------|-----------------------|-----------------------|-----------------------|-----------------------|-----------------------|-------------------------------|
| <b>Clozapine</b>              | 0.02 (-0.42 to 0.46)  | -0.08 (-0.35 to 0.20) | -0.08 (-0.71 to 0.55) | -0.11 (-0.39 to 0.17) | -0.29 (-0.59 to 0.01) | NA                    | NA                    | <b>-0.64 (-1.11 to -0.18)</b> |
| 0.02 (-0.42 to 0.46)          | <b>Ziprasidone</b>    | NA                    | NA                    | NA                    | NA                    | NA                    | NA                    | NA                            |
| -0.10 (-0.35 to 0.16)         | -0.12 (-0.63 to 0.39) | <b>Olanzapine</b>     | NA                    | NA                    | -0.73 (-1.61 to 0.15) | NA                    | 0.09 (-0.59 to 0.78)  | NA                            |
| -0.08 (-0.71 to 0.55)         | -0.10 (-0.87 to 0.67) | 0.02 (-0.66 to 0.70)  | <b>Zotepine</b>       | NA                    | NA                    | NA                    | NA                    | NA                            |
| -0.12 (-0.38 to 0.14)         | -0.14 (-0.65 to 0.37) | -0.02 (-0.38 to 0.33) | -0.04 (-0.72 to 0.64) | <b>Risperidone</b>    | -0.16 (-0.76 to 0.43) | NA                    | NA                    | NA                            |
| <b>-0.33 (-0.60 to -0.07)</b> | -0.36 (-0.87 to 0.16) | -0.24 (-0.59 to 0.11) | -0.26 (-0.94 to 0.42) | -0.21 (-0.55 to 0.12) | <b>Haloperidol</b>    | -0.09 (-0.72 to 0.54) | NA                    | NA                            |
| -0.43 (-1.11 to 0.25)         | -0.45 (-1.26 to 0.36) | -0.33 (-1.05 to 0.39) | -0.35 (-1.28 to 0.58) | -0.31 (-1.02 to 0.40) | -0.09 (-0.72 to 0.54) | <b>Fluphenazine</b>   | NA                    | NA                            |
| -0.42 (-0.89 to 0.05)         | -0.44 (-1.09 to 0.20) | -0.33 (-0.80 to 0.15) | -0.34 (-1.13 to 0.44) | -0.30 (-0.83 to 0.23) | -0.09 (-0.62 to 0.45) | 0.01 (-0.82 to 0.83)  | <b>Quetiapine</b>     | 0.11 (-0.29 to 0.50)          |
| <b>-0.45 (-0.86 to -0.05)</b> | -0.47 (-1.07 to 0.12) | -0.36 (-0.80 to 0.09) | -0.37 (-1.12 to 0.37) | -0.33 (-0.81 to 0.15) | -0.12 (-0.60 to 0.36) | -0.02 (-0.82 to 0.77) | -0.03 (-0.39 to 0.33) | <b>Chlorpromazine</b>         |

*Treatments are presented in order of efficacy ranking. Results of the network meta-analysis are reported in the left lower half and results of pairwise meta-analyses in the right upper half. Each cell provides the effect estimate and the corresponding 95% credible interval (95% CI) of a comparison (left lower half: treatment in column versus treatment in row; right upper half: treatment in row versus treatment in column). The type of effect size measure is standardized mean difference (SMD). Bold results indicate 95% CI excluding no effect. NA=not available.*

**c No response to a combination of retrospective and prospective criteria for treatment resistance**

Number of studies:  $k = 14$

Number of pairwise comparisons:  $m = 16$

Number of treatments:  $n = 10$

Number of designs:  $d = 12$

**Network plot**

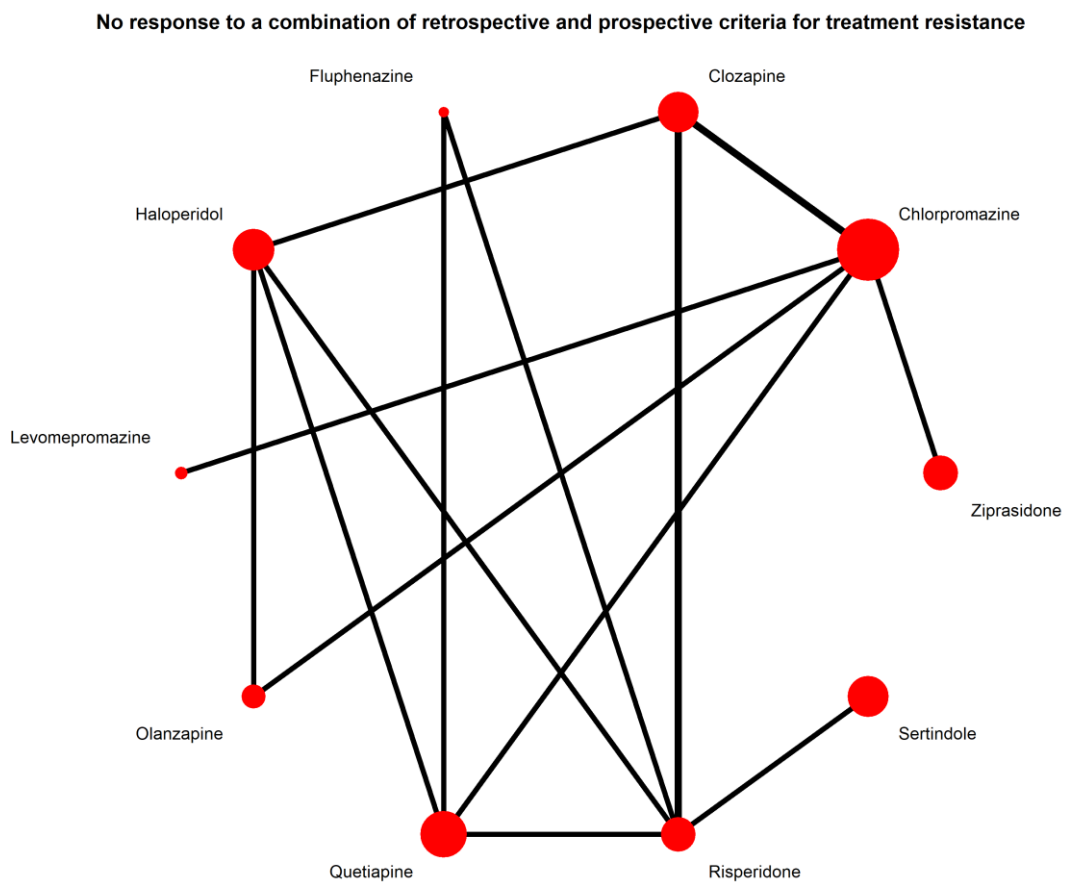

*Lines link treatments with direct comparisons in trials; thickness of lines corresponds to the number of trials evaluating the comparison; size of the nodes corresponds to the number of participants assigned to the treatment.*

| $\tau$ | P-value | Inconsistency loop (%) |
|--------|---------|------------------------|
| 0.38   | 0.2853  | 0                      |

**Forest-plot of results of network meta-analysis for antipsychotic drugs versus clozapine**

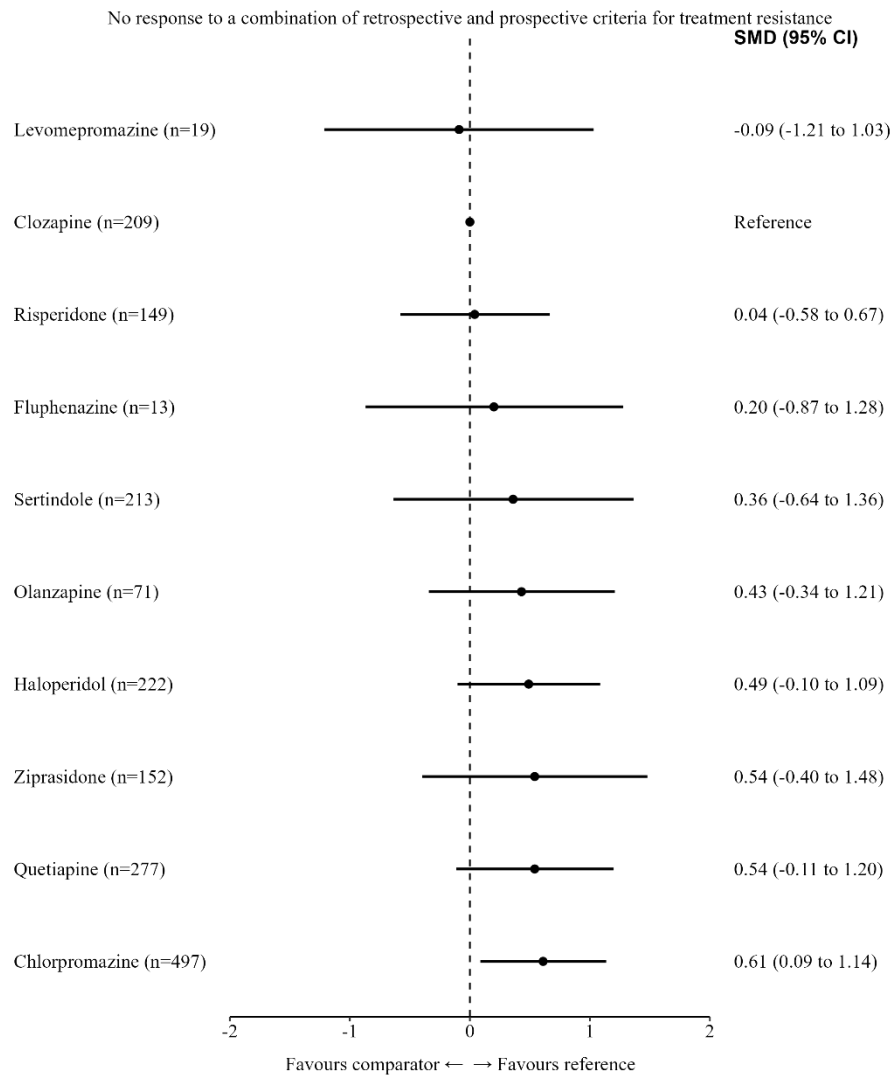

*Effect sizes, measured as standardized mean difference (SMD), are from the network meta-analysis. Order of treatments is according to the mean effect size. Reference is clozapine. The direction of the effect is indicated below the x-axis.*

### League table

|                               |                        |                       |                       |                       |                       |                       |                       |                       |                               |
|-------------------------------|------------------------|-----------------------|-----------------------|-----------------------|-----------------------|-----------------------|-----------------------|-----------------------|-------------------------------|
| <b>Clozapine</b>              | NA                     | 0.03 (-0.75 to 0.82)  | NA                    | NA                    | NA                    | -0.14 (-1.01 to 0.73) | NA                    | NA                    | <b>-0.83 (-1.45 to -0.22)</b> |
| 0.09 (-1.03 to 1.21)          | <b>Levomepromazine</b> | NA                    | NA                    | NA                    | NA                    | NA                    | NA                    | NA                    | -0.70 (-1.69 to 0.29)         |
| -0.04 (-0.67 to 0.58)         | -0.13 (-1.36 to 1.09)  | <b>Risperidone</b>    | 0.02 (-1.05 to 1.09)  | -0.32 (-1.10 to 0.46) | NA                    | -0.72 (-1.89 to 0.45) | NA                    | -0.12 (-1.21 to 0.96) | NA                            |
| -0.20 (-1.28 to 0.87)         | -0.29 (-1.77 to 1.18)  | -0.16 (-1.15 to 0.83) | <b>Fluphenazine</b>   | NA                    | NA                    | NA                    | NA                    | -0.15 (-1.23 to 0.94) | NA                            |
| -0.36 (-1.36 to 0.64)         | -0.45 (-1.91 to 1.00)  | -0.32 (-1.10 to 0.46) | -0.16 (-1.42 to 1.10) | <b>Sertindole</b>     | NA                    | NA                    | NA                    | NA                    | NA                            |
| -0.43 (-1.21 to 0.34)         | -0.52 (-1.73 to 0.69)  | -0.39 (-1.27 to 0.49) | -0.23 (-1.44 to 0.98) | -0.07 (-1.25 to 1.11) | <b>Olanzapine</b>     | -0.02 (-0.91 to 0.88) | NA                    | NA                    | -0.22 (-1.08 to 0.65)         |
| -0.49 (-1.09 to 0.10)         | -0.58 (-1.76 to 0.59)  | -0.45 (-1.13 to 0.23) | -0.29 (-1.36 to 0.79) | -0.13 (-1.17 to 0.91) | -0.06 (-0.76 to 0.64) | <b>Haloperidol</b>    | NA                    | 0.14 (-0.64 to 0.92)  | NA                            |
| -0.54 (-1.48 to 0.40)         | -0.63 (-1.89 to 0.63)  | -0.50 (-1.56 to 0.56) | -0.34 (-1.67 to 1.00) | -0.18 (-1.49 to 1.14) | -0.11 (-1.15 to 0.93) | -0.05 (-1.05 to 0.95) | <b>Ziprasidone</b>    | NA                    | -0.07 (-0.85 to 0.71)         |
| -0.54 (-1.20 to 0.11)         | -0.63 (-1.79 to 0.53)  | -0.50 (-1.20 to 0.20) | -0.34 (-1.33 to 0.66) | -0.18 (-1.23 to 0.87) | -0.11 (-0.91 to 0.69) | -0.05 (-0.64 to 0.54) | -0.00 (-0.99 to 0.98) | <b>Quetiapine</b>     | 0.32 (-0.46 to 1.11)          |
| <b>-0.61 (-1.14 to -0.09)</b> | -0.70 (-1.69 to 0.29)  | -0.57 (-1.29 to 0.15) | -0.41 (-1.50 to 0.68) | -0.25 (-1.31 to 0.81) | -0.18 (-0.87 to 0.51) | -0.12 (-0.75 to 0.51) | -0.07 (-0.85 to 0.71) | -0.07 (-0.67 to 0.53) | <b>Chlorpromazine</b>         |

Treatments are presented in order of efficacy ranking. Results of the network meta-analysis are reported in the left lower half and results of pairwise meta-analyses in the right upper half. Each cell provides the effect estimate and the corresponding 95% credible interval (95% CI) of a comparison (left lower half: treatment in column versus treatment in row; right upper half: treatment in row versus treatment in column). The type of effect size measure is standardized mean difference (SMD). Bold results indicate 95% CI excluding no effect. NA=not available

## 12.2 Mean age

### a More than 18 years old

Number of studies:  $k = 41$

Number of pairwise comparisons:  $m = 53$

Number of treatments:  $n = 12$

Number of designs:  $d = 21$

### Network plot

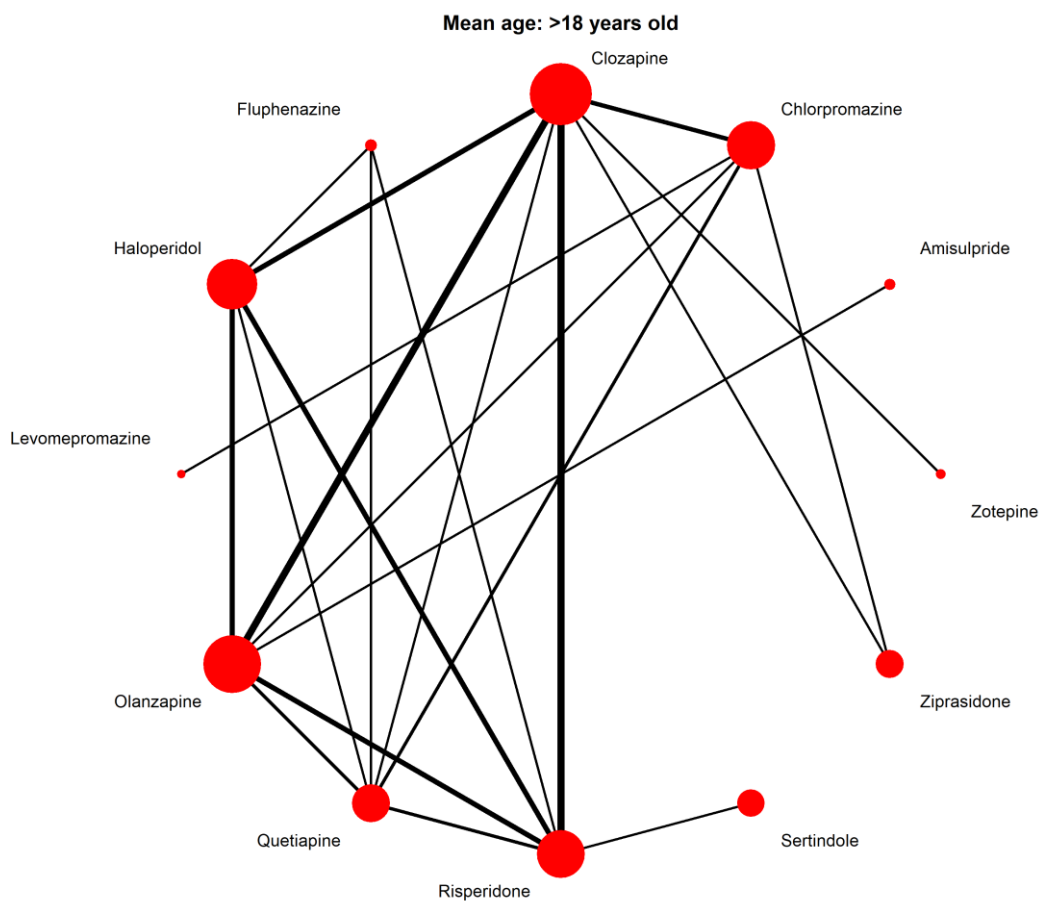

*Lines link treatments with direct comparisons in trials; thickness of lines corresponds to the number of trials evaluating the comparison; size of the nodes corresponds to the number of participants assigned to the treatment.*

| $\tau$ | P-value  | Inconsistency loop (%) |
|--------|----------|------------------------|
| 0.1882 | < 0.0001 | 11.11                  |

### Forest-plot of results of network meta-analysis for antipsychotic drugs versus clozapine

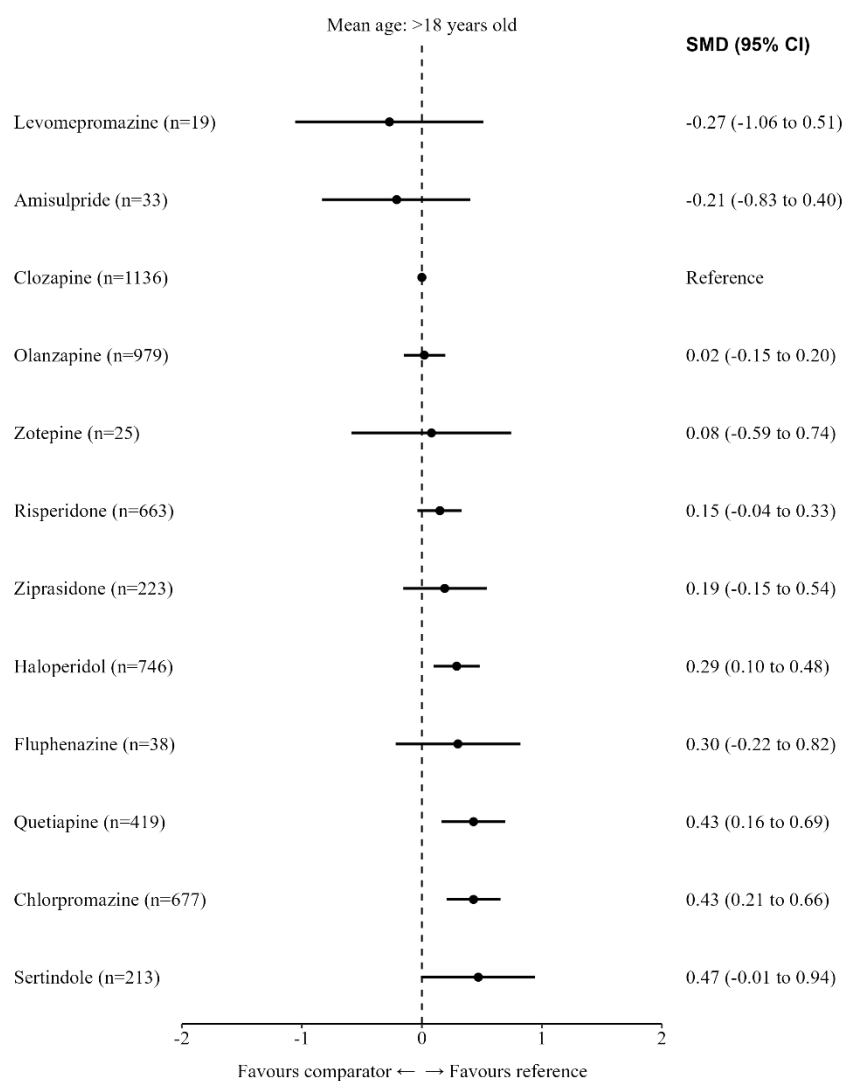

*Effect sizes, measured as standardized mean difference (SMD), are from the network meta-analysis. Order of treatments is according to the mean effect size. Reference is clozapine. The direction of the effect is indicated below the x-axis.*

## League table

|                       |                       |                               |                               |                       |                               |                       |                       |                       |                       |                               |                               |
|-----------------------|-----------------------|-------------------------------|-------------------------------|-----------------------|-------------------------------|-----------------------|-----------------------|-----------------------|-----------------------|-------------------------------|-------------------------------|
| Amisulpride           | NA                    | NA                            | -0.24 (-0.83 to 0.36)         | NA                    | NA                            | NA                    | NA                    | NA                    | NA                    | NA                            | NA                            |
| 0.06 (-0.93 to 1.05)  | Levomepromazine       | NA                            | NA                            | NA                    | NA                            | NA                    | NA                    | NA                    | NA                    | NA                            | -0.70 (-1.45 to 0.05)         |
| -0.21 (-0.83 to 0.40) | -0.27 (-1.06 to 0.51) | Clozapine                     | 0.03 (-0.19 to 0.25)          | -0.08 (-0.74 to 0.59) | -0.08 (-0.30 to 0.15)         | 0.02 (-0.47 to 0.52)  | NA                    | -0.13 (-0.41 to 0.14) | NA                    | <b>-1.01 (-1.89 to -0.13)</b> | <b>-0.78 (-1.08 to -0.47)</b> |
| -0.24 (-0.83 to 0.36) | -0.29 (-1.09 to 0.50) | -0.02 (-0.20 to 0.15)         | Olanzapine                    | NA                    | -0.23 (-0.53 to 0.07)         | NA                    | NA                    | -0.28 (-0.56 to 0.00) | NA                    | -0.07 (-0.65 to 0.52)         | -0.22 (-0.79 to 0.36)         |
| -0.29 (-1.20 to 0.62) | -0.35 (-1.38 to 0.68) | -0.08 (-0.74 to 0.59)         | -0.06 (-0.74 to 0.63)         | Zotepine              | NA                            | NA                    | NA                    | NA                    | NA                    | NA                            | NA                            |
| -0.36 (-0.99 to 0.27) | -0.42 (-1.22 to 0.38) | -0.15 (-0.33 to 0.04)         | -0.12 (-0.33 to 0.08)         | -0.07 (-0.76 to 0.62) | Risperidone                   | NA                    | 0.02 (-0.83 to 0.87)  | -0.15 (-0.49 to 0.19) | -0.32 (-0.76 to 0.12) | -0.06 (-0.74 to 0.63)         | NA                            |
| -0.41 (-1.11 to 0.30) | -0.47 (-1.29 to 0.36) | -0.19 (-0.54 to 0.15)         | -0.17 (-0.55 to 0.21)         | -0.12 (-0.87 to 0.64) | -0.05 (-0.43 to 0.34)         | Ziprasidone           | NA                    | NA                    | NA                    | NA                            | -0.07 (-0.50 to 0.36)         |
| -0.52 (-1.31 to 0.28) | -0.57 (-1.50 to 0.36) | -0.30 (-0.82 to 0.22)         | -0.28 (-0.80 to 0.25)         | -0.22 (-1.07 to 0.62) | -0.15 (-0.68 to 0.37)         | -0.11 (-0.72 to 0.51) | Fluphenazine          | 0.09 (-0.57 to 0.76)  | NA                    | -0.15 (-1.01 to 0.72)         | NA                            |
| -0.50 (-1.13 to 0.12) | -0.56 (-1.36 to 0.24) | <b>-0.29 (-0.48 to -0.10)</b> | <b>-0.27 (-0.47 to -0.07)</b> | -0.21 (-0.90 to 0.48) | -0.14 (-0.36 to 0.07)         | -0.10 (-0.48 to 0.29) | 0.01 (-0.49 to 0.52)  | Haloperidol           | NA                    | 0.14 (-0.29 to 0.58)          | NA                            |
| -0.68 (-1.45 to 0.08) | -0.74 (-1.65 to 0.17) | -0.47 (-0.94 to 0.01)         | -0.44 (-0.93 to 0.04)         | -0.39 (-1.21 to 0.43) | -0.32 (-0.76 to 0.12)         | -0.27 (-0.86 to 0.31) | -0.17 (-0.85 to 0.51) | -0.18 (-0.67 to 0.31) | Sertindole            | NA                            | NA                            |
| -0.64 (-1.30 to 0.01) | -0.70 (-1.49 to 0.09) | <b>-0.43 (-0.69 to -0.16)</b> | <b>-0.41 (-0.68 to -0.13)</b> | -0.35 (-1.07 to 0.37) | -0.28 (-0.57 to 0.01)         | -0.23 (-0.63 to 0.16) | -0.13 (-0.66 to 0.41) | -0.14 (-0.41 to 0.13) | 0.04 (-0.49 to 0.57)  | Quetiapine                    | 0.22 (-0.10 to 0.53)          |
| -0.64 (-1.29 to 0.00) | -0.70 (-1.45 to 0.05) | <b>-0.43 (-0.66 to -0.21)</b> | <b>-0.41 (-0.66 to -0.15)</b> | -0.35 (-1.06 to 0.35) | <b>-0.28 (-0.56 to -0.01)</b> | -0.24 (-0.58 to 0.10) | -0.13 (-0.67 to 0.42) | -0.14 (-0.41 to 0.13) | 0.04 (-0.48 to 0.55)  | -0.00 (-0.25 to 0.25)         | Chlorpromazine                |

Treatments are presented in order of efficacy ranking. Results of the network meta-analysis are reported in the left lower half and results of pairwise meta-analyses in the right upper half. Each cell provides the effect estimate and the corresponding 95% credible interval (95% CI) of a comparison (left lower half: treatment in column versus treatment in row; right upper half: treatment in row versus treatment in column). The type of effect size measure is standardized mean difference (SMD). Bold results indicate 95% CI excluding no effect. NA=not available.



**b Less than 18 years old**

No closed loops

### 12.3 Dose of the antipsychotics in chlorpromazine-equivalents

For the purpose of this analysis the median number of dose in chlorpromazine-equivalents was used.

#### a High dose

Number of studies:  $k = 26$

Number of pairwise comparisons:  $m = 31$

Number of treatments:  $n = 10$

Number of designs:  $d = 14$

#### Network plot

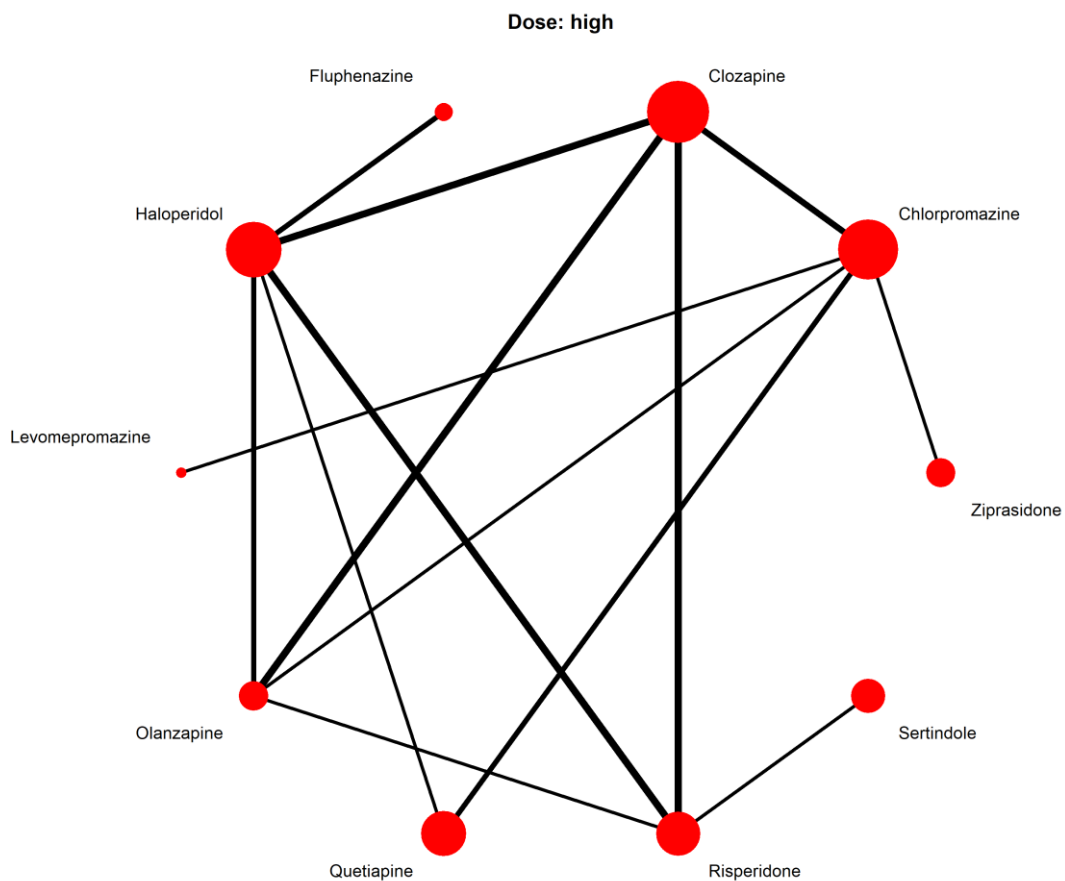

*Lines link treatments with direct comparisons in trials; thickness of lines corresponds to the number of trials evaluating the comparison; size of the nodes corresponds to the number of participants assigned to the treatment.*

| $\tau$ | P-value  | Inconsistency loop (%) |
|--------|----------|------------------------|
| 0.2378 | < 0.0001 | 30.0                   |

**Forest-plot of results of network meta-analysis for antipsychotic drugs versus clozapine**

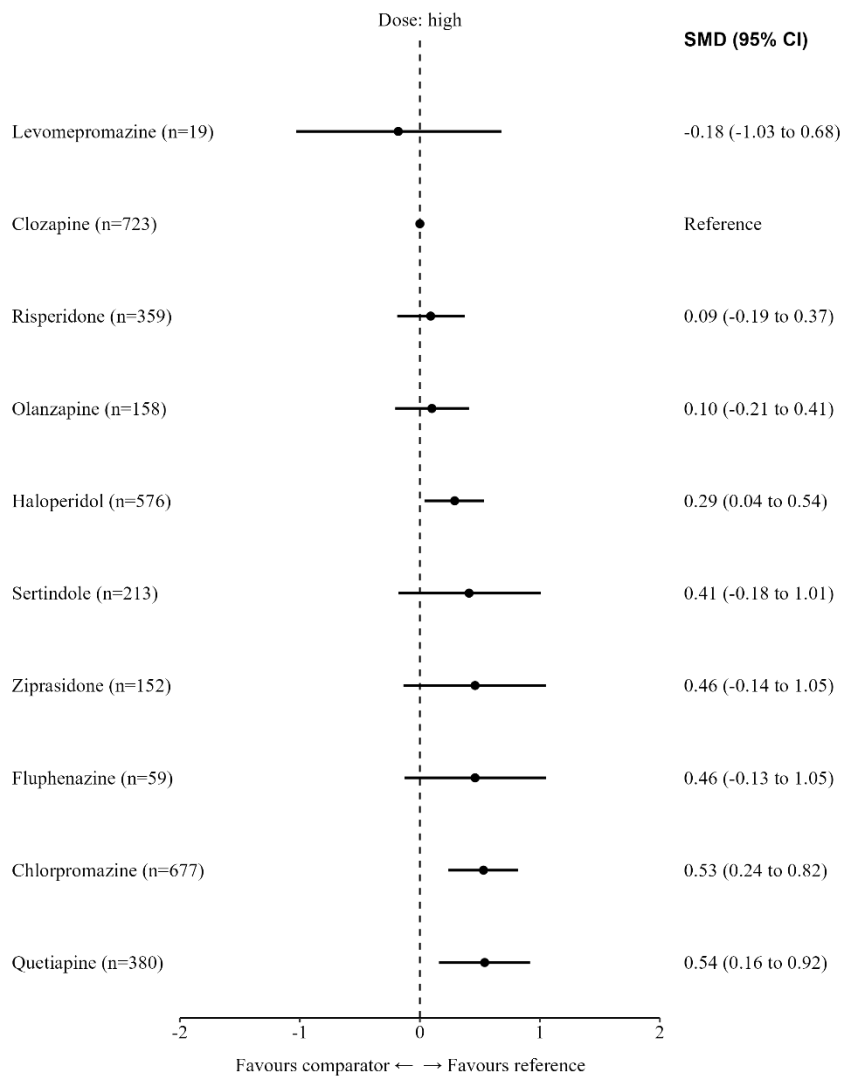

*Effect sizes, measured as standardized mean difference (SMD), are from the network meta-analysis. Order of treatments is according to the mean effect size. Reference is clozapine. The direction of the effect is indicated below the x-axis.*

### League table

|                               |                        |                               |                               |                       |                       |                       |                       |                               |                       |
|-------------------------------|------------------------|-------------------------------|-------------------------------|-----------------------|-----------------------|-----------------------|-----------------------|-------------------------------|-----------------------|
| <b>Clozapine</b>              | NA                     | 0.01 (-0.33 to 0.34)          | 0.07 (-0.33 to 0.46)          | -0.13 (-0.45 to 0.19) | NA                    | NA                    | NA                    | <b>-0.77 (-1.12 to -0.42)</b> | NA                    |
| 0.18 (-0.68 to 1.03)          | <b>Levomepromazine</b> | NA                            | NA                            | NA                    | NA                    | NA                    | NA                    | -0.70 (-1.51 to 0.10)         | NA                    |
| -0.09 (-0.37 to 0.19)         | -0.27 (-1.16 to 0.62)  | <b>Risperidone</b>            | 0.24 (-0.40 to 0.88)          | -0.15 (-0.53 to 0.22) | -0.32 (-0.84 to 0.20) | NA                    | NA                    | NA                            | NA                    |
| -0.10 (-0.41 to 0.21)         | -0.28 (-1.16 to 0.61)  | -0.01 (-0.38 to 0.37)         | <b>Olanzapine</b>             | -0.20 (-0.67 to 0.27) | NA                    | NA                    | NA                    | -0.22 (-0.85 to 0.42)         | NA                    |
| <b>-0.29 (-0.54 to -0.04)</b> | -0.46 (-1.33 to 0.41)  | -0.19 (-0.49 to 0.10)         | -0.19 (-0.52 to 0.15)         | <b>Haloperidol</b>    | NA                    | NA                    | -0.18 (-0.71 to 0.36) | NA                            | 0.14 (-0.38 to 0.66)  |
| -0.41 (-1.01 to 0.18)         | -0.59 (-1.62 to 0.44)  | -0.32 (-0.84 to 0.20)         | -0.31 (-0.95 to 0.33)         | -0.13 (-0.73 to 0.47) | <b>Sertindole</b>     | NA                    | NA                    | NA                            | NA                    |
| -0.46 (-1.05 to 0.14)         | -0.63 (-1.59 to 0.32)  | -0.36 (-1.01 to 0.28)         | -0.35 (-0.99 to 0.28)         | -0.17 (-0.79 to 0.45) | -0.04 (-0.87 to 0.79) | <b>Ziprasidone</b>    | NA                    | -0.07 (-0.59 to 0.45)         | NA                    |
| -0.46 (-1.05 to 0.13)         | -0.64 (-1.66 to 0.39)  | -0.37 (-0.98 to 0.24)         | -0.36 (-0.99 to 0.27)         | -0.18 (-0.71 to 0.36) | -0.05 (-0.85 to 0.76) | -0.01 (-0.82 to 0.81) | <b>Fluphenazine</b>   | NA                            | NA                    |
| <b>-0.53 (-0.82 to -0.24)</b> | -0.70 (-1.51 to 0.10)  | <b>-0.43 (-0.82 to -0.05)</b> | <b>-0.43 (-0.79 to -0.06)</b> | -0.24 (-0.58 to 0.10) | -0.11 (-0.76 to 0.54) | -0.07 (-0.59 to 0.45) | -0.06 (-0.70 to 0.57) | <b>Chlorpromazine</b>         | -0.21 (-0.59 to 0.16) |
| <b>-0.54 (-0.92 to -0.16)</b> | -0.71 (-1.58 to 0.15)  | -0.45 (-0.89 to 0.00)         | -0.44 (-0.88 to 0.00)         | -0.25 (-0.63 to 0.13) | -0.13 (-0.81 to 0.56) | -0.08 (-0.69 to 0.53) | -0.08 (-0.73 to 0.58) | -0.01 (-0.34 to 0.31)         | <b>Quetiapine</b>     |

Treatments are presented in order of efficacy ranking. Results of the network meta-analysis are reported in the left lower half and results of pairwise meta-analyses in the right upper half. Each cell provides the effect estimate and the corresponding 95% credible interval (95% CI) of a comparison (left lower half: treatment in column versus treatment in row; right upper half: treatment in row versus treatment in column). The type of effect size measure is standardized mean difference (SMD). Bold results indicate 95% CI excluding no effect. NA=not available.

**b Low dose**

Number of studies:  $k = 19$

Number of pairwise comparisons:  $m = 26$

Number of treatments:  $n = 9$

Number of designs:  $d = 11$

**Network plot**

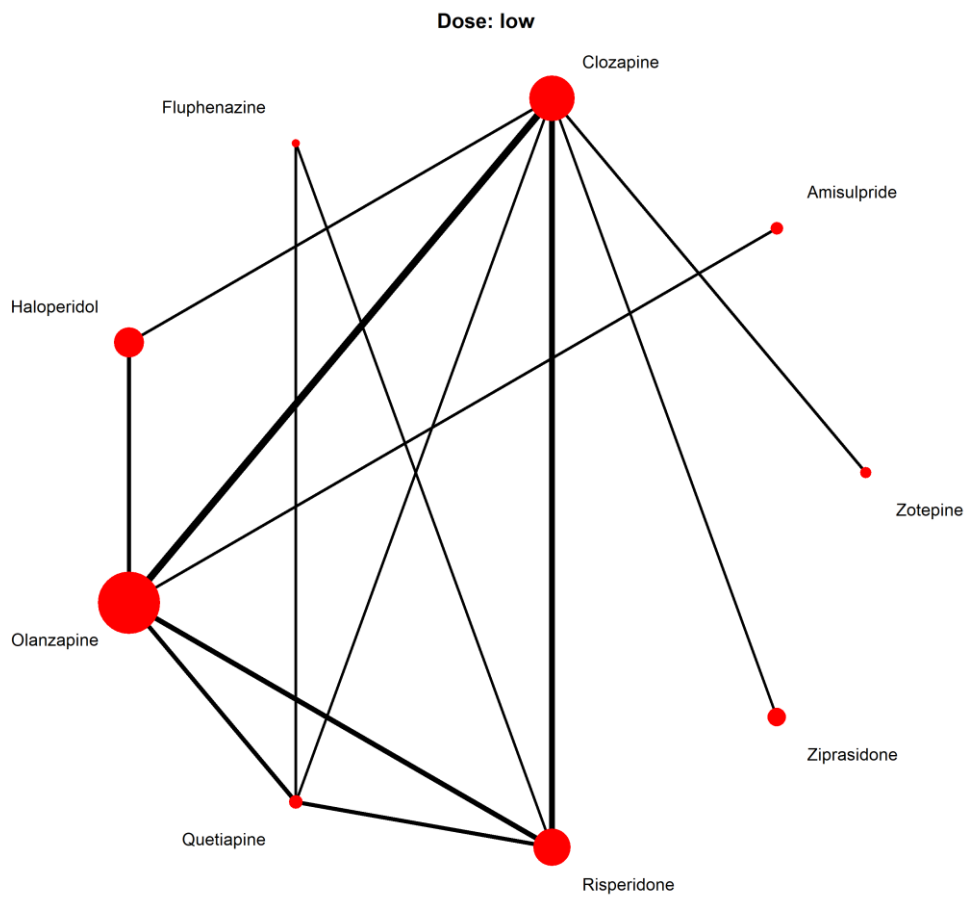

*Lines link treatments with direct comparisons in trials; thickness of lines corresponds to the number of trials evaluating the comparison; size of the nodes corresponds to the number of participants assigned to the treatment.*

| $\tau$ | P-value | Inconsistency loop (%) |
|--------|---------|------------------------|
| 0.1233 | 0.0817  | 10.0                   |

**Forest-plot of results of network meta-analysis for antipsychotic drugs versus clozapine**

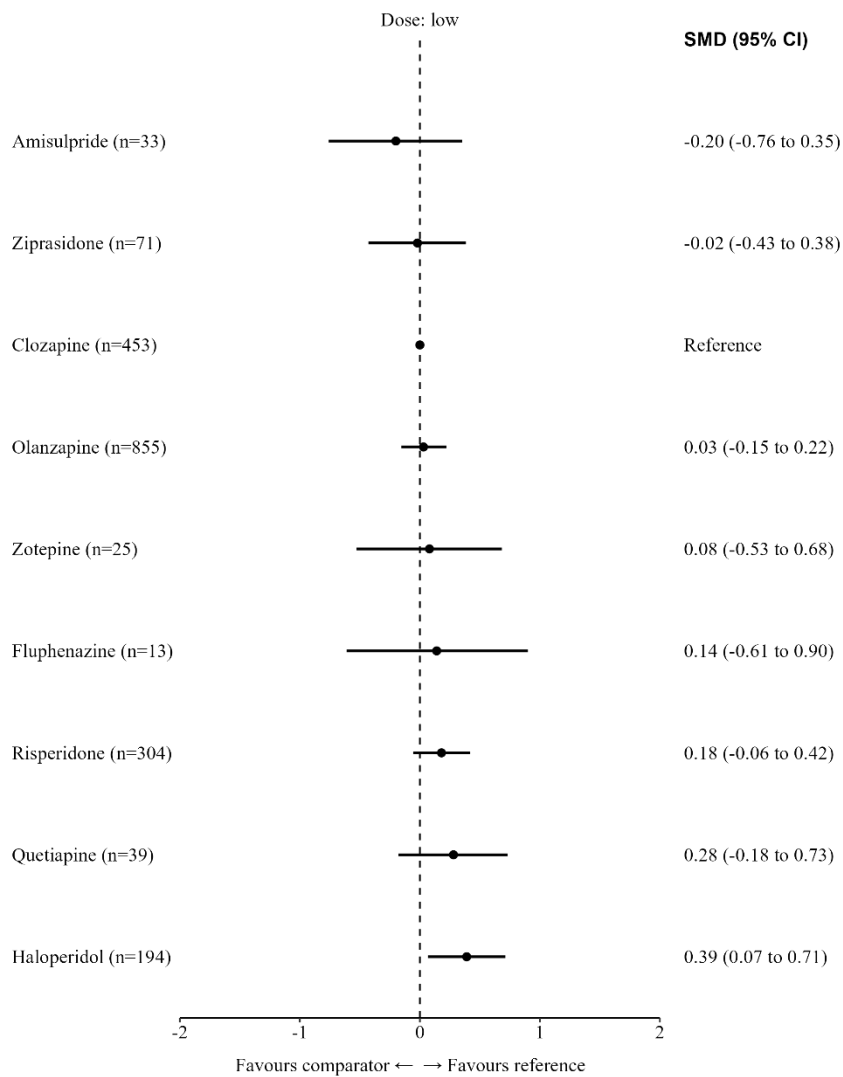

*Effect sizes, measured as standardized mean difference (SMD), are from the network meta-analysis. Order of treatments is according to the mean effect size. Reference is clozapine. The direction of the effect is indicated below the x-axis.*

### League table

|                       |                               |                       |                               |                       |                       |                       |                               |                               |
|-----------------------|-------------------------------|-----------------------|-------------------------------|-----------------------|-----------------------|-----------------------|-------------------------------|-------------------------------|
| Amisulpride           | NA                            | NA                    | -0.24 (-0.76 to 0.29)         | NA                    | NA                    | NA                    | NA                            | NA                            |
| -0.20 (-0.76 to 0.35) | <b>Clozapine</b>              | 0.02 (-0.38 to 0.43)  | -0.03 (-0.25 to 0.18)         | -0.08 (-0.68 to 0.53) | NA                    | -0.13 (-0.46 to 0.19) | <b>-1.01 (-1.84 to -0.18)</b> | -0.78 (-1.70 to 0.14)         |
| -0.18 (-0.87 to 0.51) | 0.02 (-0.38 to 0.43)          | <b>Ziprasidone</b>    | NA                            | NA                    | NA                    | NA                    | NA                            | NA                            |
| -0.24 (-0.76 to 0.29) | -0.03 (-0.22 to 0.15)         | -0.06 (-0.50 to 0.39) | <b>Olanzapine</b>             | NA                    | NA                    | -0.23 (-0.51 to 0.05) | -0.06 (-0.61 to 0.49)         | <b>-0.32 (-0.61 to -0.03)</b> |
| -0.28 (-1.10 to 0.54) | -0.08 (-0.68 to 0.53)         | -0.10 (-0.83 to 0.63) | -0.04 (-0.68 to 0.59)         | <b>Zotepine</b>       | NA                    | NA                    | NA                            | NA                            |
| -0.35 (-1.26 to 0.57) | -0.14 (-0.90 to 0.61)         | -0.17 (-1.03 to 0.69) | -0.11 (-0.86 to 0.64)         | -0.07 (-1.03 to 0.90) | <b>Fluphenazine</b>   | -0.02 (-0.83 to 0.78) | -0.15 (-0.97 to 0.67)         | NA                            |
| -0.38 (-0.96 to 0.19) | -0.18 (-0.42 to 0.06)         | -0.20 (-0.67 to 0.27) | -0.15 (-0.37 to 0.08)         | -0.10 (-0.75 to 0.55) | -0.04 (-0.77 to 0.70) | <b>Risperidone</b>    | -0.06 (-0.71 to 0.60)         | NA                            |
| -0.48 (-1.16 to 0.21) | -0.28 (-0.73 to 0.18)         | -0.30 (-0.91 to 0.31) | -0.24 (-0.68 to 0.20)         | -0.20 (-0.96 to 0.56) | -0.13 (-0.87 to 0.61) | -0.09 (-0.55 to 0.36) | <b>Quetiapine</b>             | NA                            |
| -0.59 (-1.18 to 0.00) | <b>-0.39 (-0.71 to -0.07)</b> | -0.41 (-0.93 to 0.11) | <b>-0.36 (-0.63 to -0.08)</b> | -0.31 (-1.00 to 0.37) | -0.25 (-1.04 to 0.55) | -0.21 (-0.56 to 0.14) | -0.11 (-0.63 to 0.40)         | <b>Haloperidol</b>            |

Treatments are presented in order of efficacy ranking. Results of the network meta-analysis are reported in the left lower half and results of pairwise meta-analyses in the right upper half. Each cell provides the effect estimate and the corresponding 95% credible interval (95% CI) of a comparison (left lower half: treatment in column versus treatment in row; right upper half: treatment in row versus treatment in column). The type of effect size measure is standardized mean difference (SMD). Bold results indicate 95% CI excluding no effect. NA=not available.

## 12.4 Publication year

For the purpose of this analysis the median number of publication year was used.

### a Early

Number of studies:  $k = 23$

Number of pairwise comparisons:  $m = 23$

Number of treatments:  $n = 8$

Number of designs:  $d = 11$

### Network plot

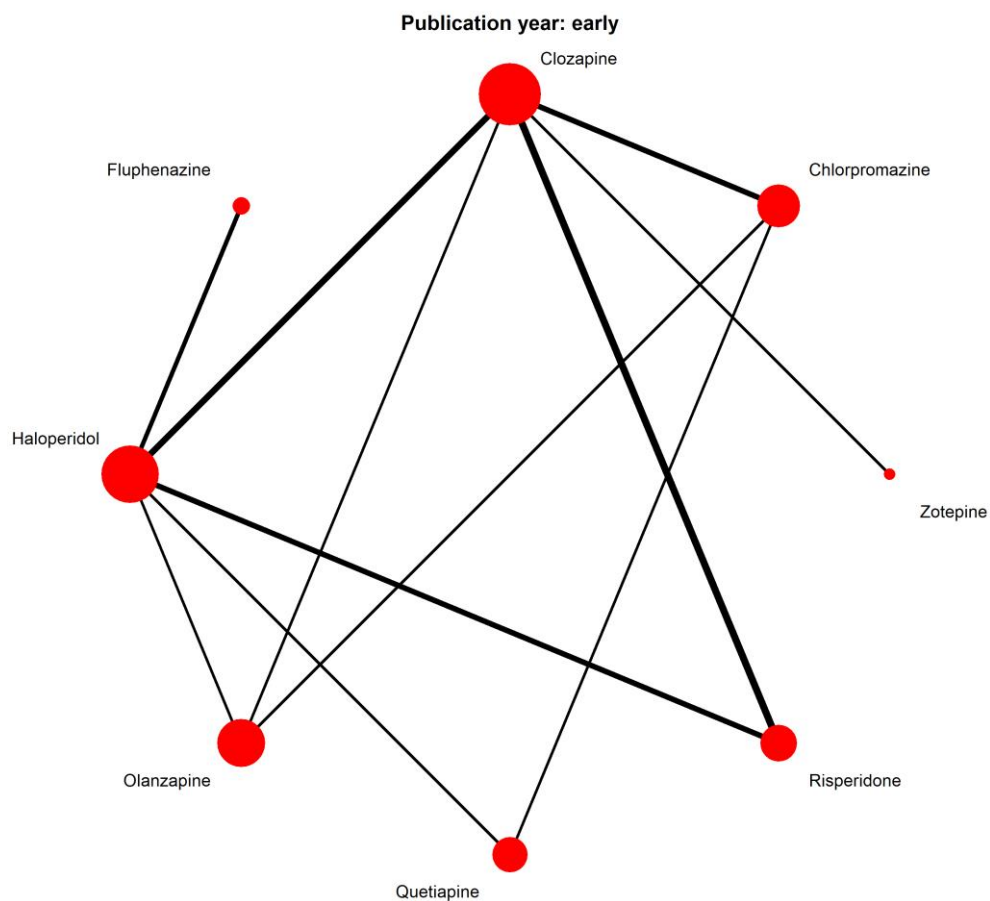

*Lines link treatments with direct comparisons in trials; thickness of lines corresponds to the number of trials evaluating the comparison; size of the nodes corresponds to the number of participants assigned to the treatment.*

| $\tau$ | P-value | Inconsistency loop (%) |
|--------|---------|------------------------|
| 0.1966 | 0.0136  | 33.33                  |



**Forest-plot of results of network meta-analysis for antipsychotic drugs versus clozapine**

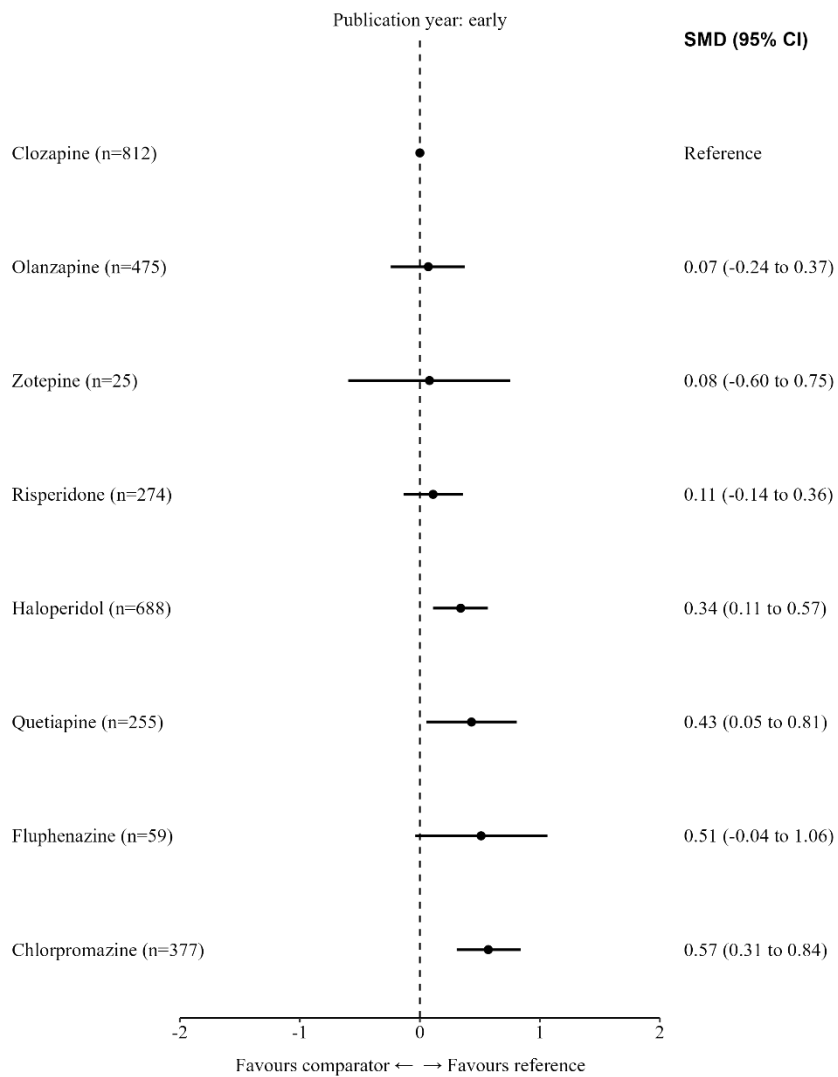

*Effect sizes, measured as standardized mean difference (SMD), are from the network meta-analysis. Order of treatments is according to the mean effect size. Reference is clozapine. The direction of the effect is indicated below the x-axis.*

### League table

|                               |                               |                               |                       |                       |                       |                       |                               |
|-------------------------------|-------------------------------|-------------------------------|-----------------------|-----------------------|-----------------------|-----------------------|-------------------------------|
| <b>Clozapine</b>              | 0.14 (-0.34 to 0.63)          | -0.08 (-0.37 to 0.20)         | -0.08 (-0.75 to 0.60) | -0.26 (-0.57 to 0.04) | NA                    | NA                    | <b>-0.77 (-1.09 to -0.46)</b> |
| -0.07 (-0.37 to 0.24)         | <b>Olanzapine</b>             | NA                            | NA                    | -0.27 (-0.70 to 0.16) | NA                    | NA                    | -0.22 (-0.80 to 0.37)         |
| -0.11 (-0.36 to 0.14)         | -0.05 (-0.42 to 0.33)         | <b>Risperidone</b>            | NA                    | -0.16 (-0.59 to 0.27) | NA                    | NA                    | NA                            |
| -0.08 (-0.75 to 0.60)         | -0.01 (-0.76 to 0.73)         | 0.03 (-0.69 to 0.75)          | <b>Zotepine</b>       | NA                    | NA                    | NA                    | NA                            |
| <b>-0.34 (-0.57 to -0.11)</b> | -0.27 (-0.58 to 0.04)         | -0.23 (-0.51 to 0.06)         | -0.26 (-0.97 to 0.45) | <b>Haloperidol</b>    | 0.14 (-0.31 to 0.59)  | -0.17 (-0.68 to 0.33) | NA                            |
| <b>-0.43 (-0.81 to -0.05)</b> | -0.37 (-0.80 to 0.07)         | -0.32 (-0.75 to 0.11)         | -0.35 (-1.13 to 0.42) | -0.09 (-0.45 to 0.26) | <b>Quetiapine</b>     | NA                    | 0.11 (-0.36 to 0.57)          |
| -0.51 (-1.06 to 0.04)         | -0.45 (-1.04 to 0.14)         | -0.40 (-0.98 to 0.18)         | -0.43 (-1.31 to 0.44) | -0.17 (-0.68 to 0.33) | -0.08 (-0.70 to 0.53) | <b>Fluphenazine</b>   | NA                            |
| <b>-0.57 (-0.84 to -0.31)</b> | <b>-0.51 (-0.86 to -0.16)</b> | <b>-0.46 (-0.82 to -0.11)</b> | -0.50 (-1.22 to 0.23) | -0.24 (-0.55 to 0.08) | -0.14 (-0.50 to 0.22) | -0.06 (-0.65 to 0.53) | <b>Chlorpromazine</b>         |

Treatments are presented in order of efficacy ranking. Results of the network meta-analysis are reported in the left lower half and results of pairwise meta-analyses in the right upper half. Each cell provides the effect estimate and the corresponding 95% credible interval (95% CI) of a comparison (left lower half: treatment in column versus treatment in row; right upper half: treatment in row versus treatment in column). The type of effect size measure is standardized mean difference (SMD). Bold results indicate 95% CI excluding no effect. NA=not available.

## **b Late**

Number of studies:  $k = 22$

Number of pairwise comparisons:  $m = 34$

Number of treatments:  $n = 11$

Number of designs:  $d = 14$

## **Network plot**

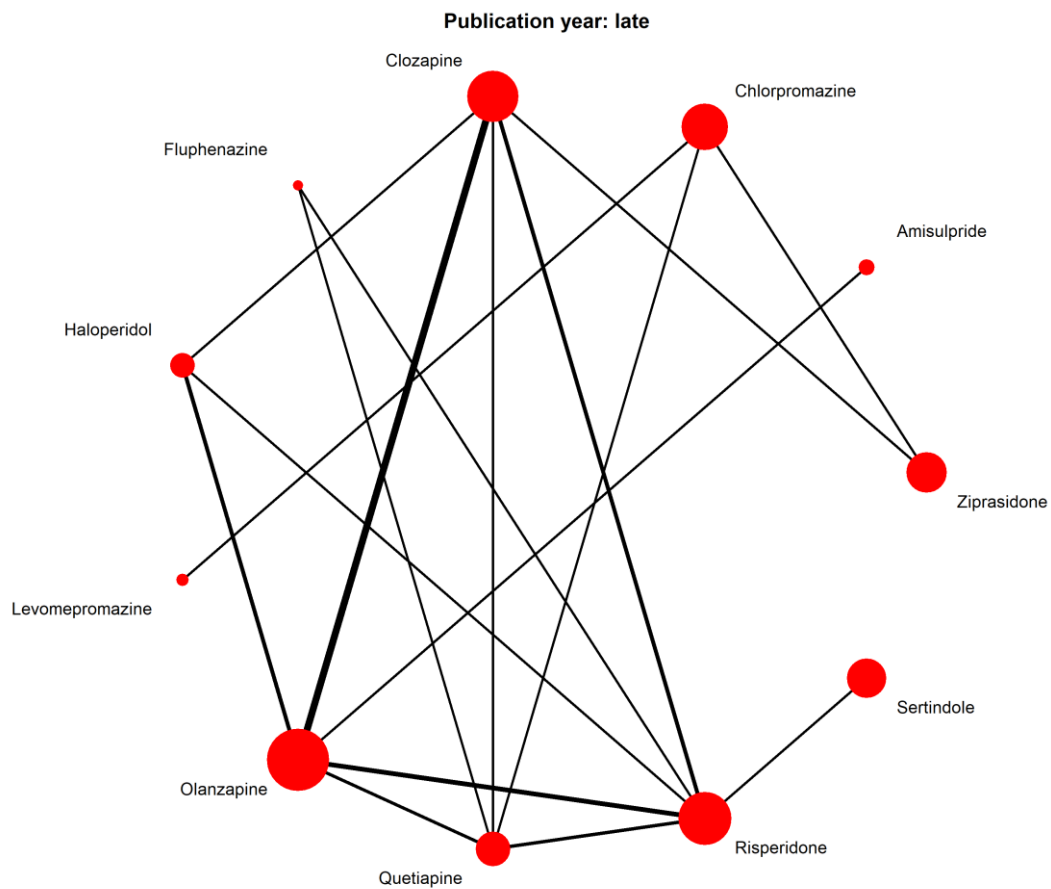

*Lines link treatments with direct comparisons in trials; thickness of lines corresponds to the number of trials evaluating the comparison; size of the nodes corresponds to the number of participants assigned to the treatment.*

| $\tau$ | P-value | Inconsistency loop (%) |
|--------|---------|------------------------|
| 0.1125 | 0.0935  | 14.29                  |

**Forest-plot of results of network meta-analysis for antipsychotic drugs versus clozapine**

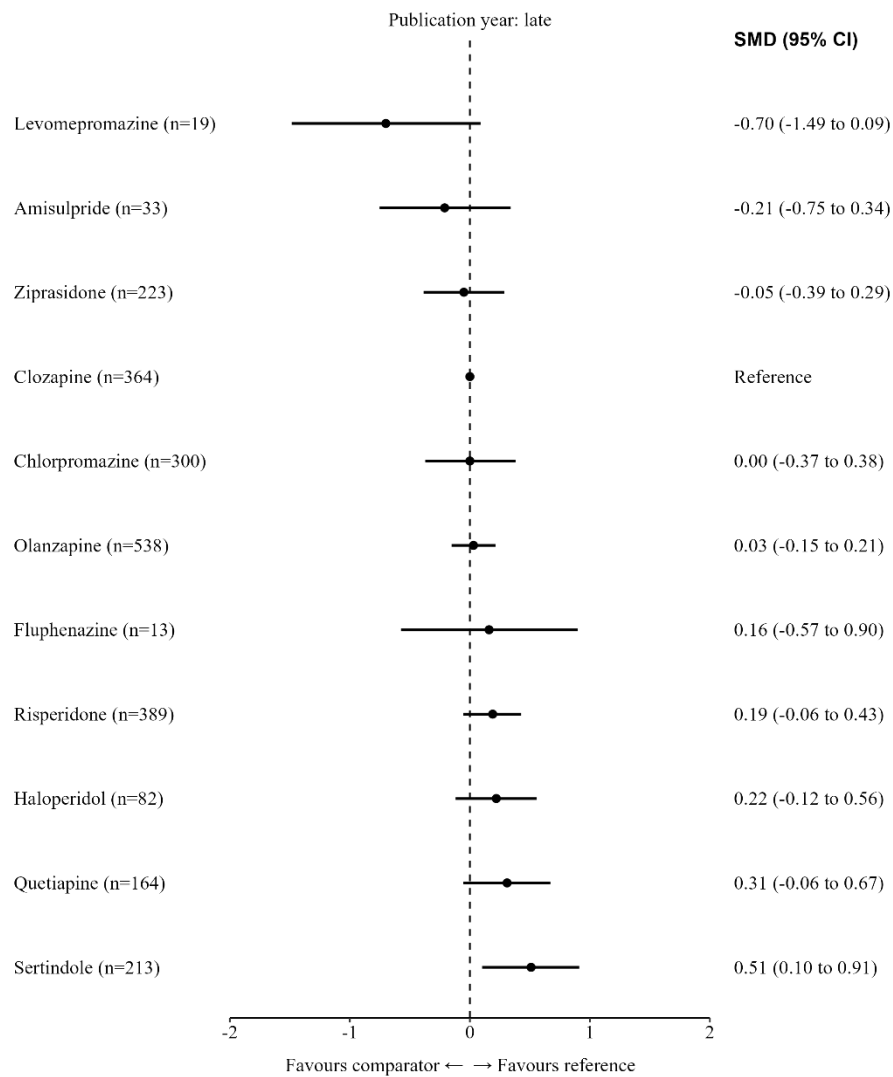

*Effect sizes, measured as standardized mean difference (SMD), are from the network meta-analysis. Order of treatments is according to the mean effect size. Reference is clozapine. The direction of the effect is indicated below the x-axis.*

### League table

|                               |                               |                               |                               |                               |                               |                       |                       |                       |                               |                       |
|-------------------------------|-------------------------------|-------------------------------|-------------------------------|-------------------------------|-------------------------------|-----------------------|-----------------------|-----------------------|-------------------------------|-----------------------|
| <b>Levomepromazine</b>        | NA                            | NA                            | NA                            | <b>-0.70 (-1.39 to -0.01)</b> | NA                            | NA                    | NA                    | NA                    | NA                            | NA                    |
| -0.49 (-1.44 to 0.45)         | <b>Amisulpride</b>            | NA                            | NA                            | NA                            | -0.24 (-0.75 to 0.28)         | NA                    | NA                    | NA                    | NA                            | NA                    |
| -0.65 (-1.40 to 0.10)         | -0.16 (-0.79 to 0.47)         | <b>Ziprasidone</b>            | -0.02 (-0.42 to 0.37)         | -0.07 (-0.39 to 0.24)         | NA                            | NA                    | NA                    | NA                    | NA                            | NA                    |
| -0.70 (-1.49 to 0.09)         | -0.21 (-0.75 to 0.34)         | -0.05 (-0.39 to 0.29)         | <b>Clozapine</b>              | NA                            | -0.03 (-0.23 to 0.17)         | NA                    | -0.02 (-0.37 to 0.33) | 0.12 (-0.38 to 0.62)  | <b>-1.01 (-1.83 to -0.19)</b> | NA                    |
| <b>-0.70 (-1.39 to -0.01)</b> | -0.21 (-0.86 to 0.44)         | -0.05 (-0.34 to 0.23)         | -0.00 (-0.38 to 0.37)         | <b>Chlorpromazine</b>         | NA                            | NA                    | NA                    | NA                    | -0.32 (-0.65 to 0.01)         | NA                    |
| -0.73 (-1.52 to 0.07)         | -0.24 (-0.75 to 0.28)         | -0.08 (-0.44 to 0.28)         | -0.03 (-0.21 to 0.15)         | -0.03 (-0.42 to 0.36)         | <b>Olanzapine</b>             | NA                    | -0.23 (-0.47 to 0.00) | -0.29 (-0.62 to 0.05) | -0.06 (-0.60 to 0.49)         | NA                    |
| -0.86 (-1.89 to 0.17)         | -0.37 (-1.26 to 0.53)         | -0.21 (-0.98 to 0.56)         | -0.16 (-0.90 to 0.57)         | -0.16 (-0.92 to 0.60)         | -0.13 (-0.86 to 0.60)         | <b>Fluphenazine</b>   | -0.02 (-0.82 to 0.78) | NA                    | -0.15 (-0.96 to 0.67)         | NA                    |
| <b>-0.88 (-1.69 to -0.08)</b> | -0.39 (-0.95 to 0.16)         | -0.24 (-0.63 to 0.16)         | -0.19 (-0.43 to 0.06)         | -0.18 (-0.60 to 0.23)         | -0.16 (-0.37 to 0.05)         | -0.02 (-0.75 to 0.70) | <b>Risperidone</b>    | -0.12 (-0.62 to 0.37) | -0.06 (-0.71 to 0.59)         | -0.32 (-0.64 to 0.00) |
| <b>-0.92 (-1.76 to -0.07)</b> | -0.43 (-1.03 to 0.18)         | -0.27 (-0.73 to 0.20)         | -0.22 (-0.56 to 0.12)         | -0.21 (-0.70 to 0.27)         | -0.19 (-0.50 to 0.12)         | -0.06 (-0.84 to 0.73) | -0.03 (-0.38 to 0.31) | <b>Haloperidol</b>    | NA                            | NA                    |
| <b>-1.01 (-1.76 to -0.25)</b> | -0.51 (-1.14 to 0.12)         | -0.36 (-0.72 to 0.01)         | -0.31 (-0.67 to 0.06)         | -0.30 (-0.60 to 0.00)         | -0.28 (-0.64 to 0.09)         | -0.15 (-0.87 to 0.58) | -0.12 (-0.51 to 0.27) | -0.09 (-0.56 to 0.38) | <b>Quetiapine</b>             | NA                    |
| <b>-1.20 (-2.07 to -0.34)</b> | <b>-0.71 (-1.36 to -0.07)</b> | <b>-0.56 (-1.06 to -0.05)</b> | <b>-0.51 (-0.91 to -0.10)</b> | -0.50 (-1.03 to 0.02)         | <b>-0.48 (-0.86 to -0.09)</b> | -0.34 (-1.13 to 0.45) | -0.32 (-0.64 to 0.00) | -0.29 (-0.76 to 0.19) | -0.20 (-0.70 to 0.31)         | <b>Sertindole</b>     |

Treatments are presented in order of efficacy ranking. Results of the network meta-analysis are reported in the left lower half and results of pairwise meta-analyses in the right upper half. Each cell provides the effect estimate and the corresponding 95% credible interval (95% CI) of a comparison (left lower half: treatment in column versus treatment in row; right upper half: treatment in row versus treatment in column). The type of effect size measure is standardized mean difference (SMD). Bold results indicate 95% CI excluding no effect. NA=not available.

## 12.5 Baseline severity

For the purpose of this analysis the median baseline severity of each scale was used.

### a High

Number of studies:  $k = 21$

Number of pairwise comparisons:  $m = 23$

Number of treatments:  $n = 10$

Number of designs:  $d = 12$

### Network plot

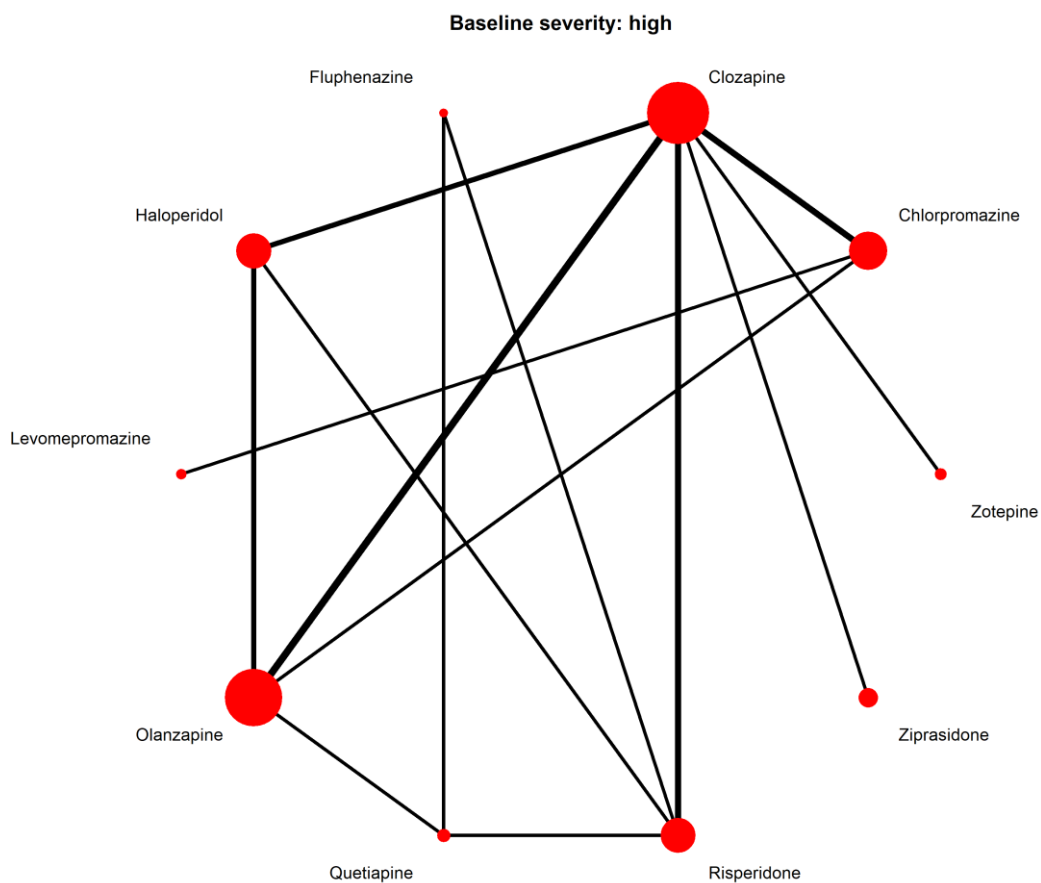

*Lines link treatments with direct comparisons in trials; thickness of lines corresponds to the number of trials evaluating the comparison; size of the nodes corresponds to the number of participants assigned to the treatment.*

| $\tau$ | P-value | Inconsistency loop (%) |
|--------|---------|------------------------|
| 0.0986 | 0.1524  | 27.27                  |

**Forest-plot of results of network meta-analysis for antipsychotic drugs versus clozapine**

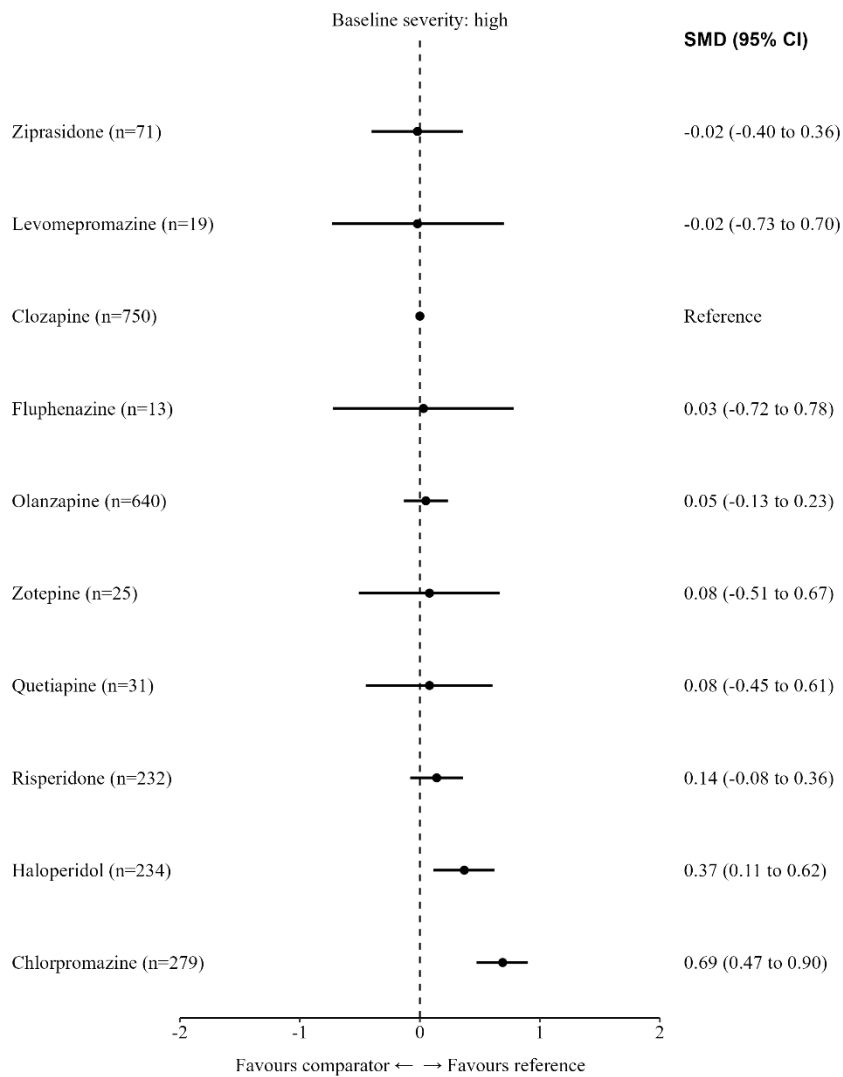

*Effect sizes, measured as standardized mean difference (SMD), are from the network meta-analysis. Order of treatments is according to the mean effect size. Reference is clozapine. The direction of the effect is indicated below the x-axis.*

### League table

|                               |                               |                               |                       |                               |                               |                       |                               |                               |                               |
|-------------------------------|-------------------------------|-------------------------------|-----------------------|-------------------------------|-------------------------------|-----------------------|-------------------------------|-------------------------------|-------------------------------|
| <b>Clozapine</b>              | 0.02 (-0.36 to 0.40)          | NA                            | NA                    | 0.05 (-0.16 to 0.27)          | NA                            | -0.08 (-0.67 to 0.51) | -0.14 (-0.38 to 0.10)         | -0.47 (-1.05 to 0.10)         | <b>-0.79 (-1.02 to -0.55)</b> |
| 0.02 (-0.36 to 0.40)          | <b>Ziprasidone</b>            | NA                            | NA                    | NA                            | NA                            | NA                    | NA                            | NA                            | NA                            |
| 0.02 (-0.70 to 0.73)          | -0.01 (-0.82 to 0.80)         | <b>Levomepromazine</b>        | NA                    | NA                            | NA                            | NA                    | NA                            | NA                            | <b>-0.70 (-1.39 to -0.02)</b> |
| -0.03 (-0.78 to 0.72)         | -0.05 (-0.89 to 0.79)         | -0.04 (-1.08 to 0.99)         | <b>Fluphenazine</b>   | NA                            | -0.15 (-0.96 to 0.66)         | NA                    | -0.02 (-0.81 to 0.77)         | NA                            | NA                            |
| -0.05 (-0.23 to 0.13)         | -0.07 (-0.50 to 0.35)         | -0.07 (-0.80 to 0.66)         | -0.02 (-0.78 to 0.73) | <b>Olanzapine</b>             | 0.09 (-0.56 to 0.74)          | NA                    | NA                            | <b>-0.31 (-0.56 to -0.06)</b> | -0.22 (-0.69 to 0.26)         |
| -0.08 (-0.61 to 0.45)         | -0.10 (-0.75 to 0.55)         | -0.09 (-0.98 to 0.79)         | -0.05 (-0.79 to 0.69) | -0.03 (-0.54 to 0.49)         | <b>Quetiapine</b>             | NA                    | 0.12 (-0.68 to 0.93)          | NA                            | NA                            |
| -0.08 (-0.67 to 0.51)         | -0.10 (-0.80 to 0.60)         | -0.09 (-1.02 to 0.83)         | -0.05 (-1.00 to 0.90) | -0.03 (-0.64 to 0.59)         | -0.00 (-0.79 to 0.79)         | <b>Zotepine</b>       | NA                            | NA                            | NA                            |
| -0.14 (-0.36 to 0.08)         | -0.16 (-0.60 to 0.28)         | -0.16 (-0.90 to 0.59)         | -0.11 (-0.85 to 0.62) | -0.09 (-0.36 to 0.18)         | -0.06 (-0.59 to 0.47)         | -0.06 (-0.69 to 0.57) | <b>Risperidone</b>            | -0.16 (-0.71 to 0.39)         | NA                            |
| <b>-0.37 (-0.62 to -0.11)</b> | -0.39 (-0.85 to 0.07)         | -0.38 (-1.14 to 0.37)         | -0.34 (-1.11 to 0.44) | <b>-0.32 (-0.54 to -0.09)</b> | -0.29 (-0.84 to 0.26)         | -0.29 (-0.93 to 0.35) | -0.23 (-0.53 to 0.07)         | <b>Haloperidol</b>            | NA                            |
| <b>-0.69 (-0.90 to -0.47)</b> | <b>-0.71 (-1.14 to -0.27)</b> | <b>-0.70 (-1.39 to -0.02)</b> | -0.66 (-1.44 to 0.12) | <b>-0.63 (-0.89 to -0.38)</b> | <b>-0.61 (-1.17 to -0.05)</b> | -0.61 (-1.23 to 0.02) | <b>-0.55 (-0.85 to -0.24)</b> | -0.32 (-0.64 to 0.00)         | <b>Chlorpromazine</b>         |

Treatments are presented in order of efficacy ranking. Results of the network meta-analysis are reported in the left lower half and results of pairwise meta-analyses in the right upper half. Each cell provides the effect estimate and the corresponding 95% credible interval (95% CI) of a comparison (left lower half: treatment in column versus treatment in row; right upper half: treatment in row versus treatment in column). The type of effect size measure is standardized mean difference (SMD). Bold results indicate 95% CI excluding no effect. NA=not available.



**b Low**

Number of studies: k = 19

Number of pairwise comparisons: m = 26

Number of treatments: n = 8

Number of designs: d = 11

**Network plot**

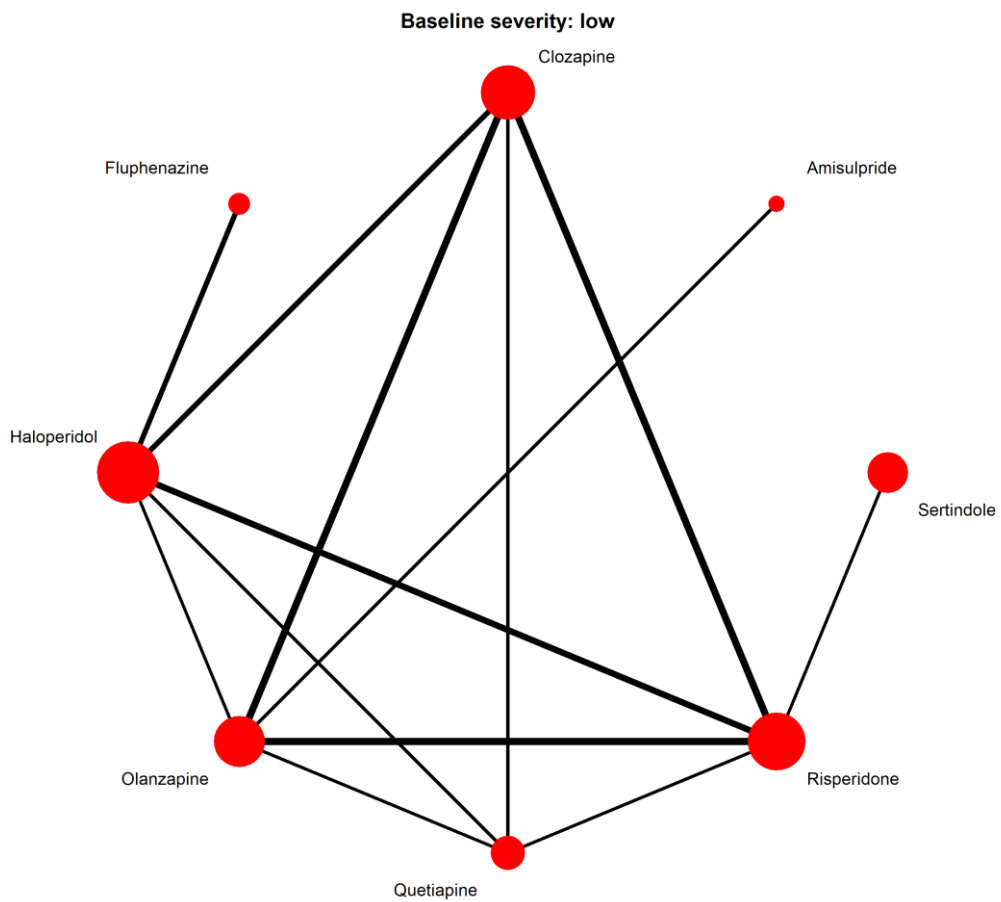

*Lines link treatments with direct comparisons in trials; thickness of lines corresponds to the number of trials evaluating the comparison; size of the nodes corresponds to the number of participants assigned to the treatment.*

| $\tau$ | P-value | Inconsistency loop (%) |
|--------|---------|------------------------|
| 0.0925 | 0.1893  | 20.0                   |

**Forest-plot of results of network meta-analysis for antipsychotic drugs versus clozapine**

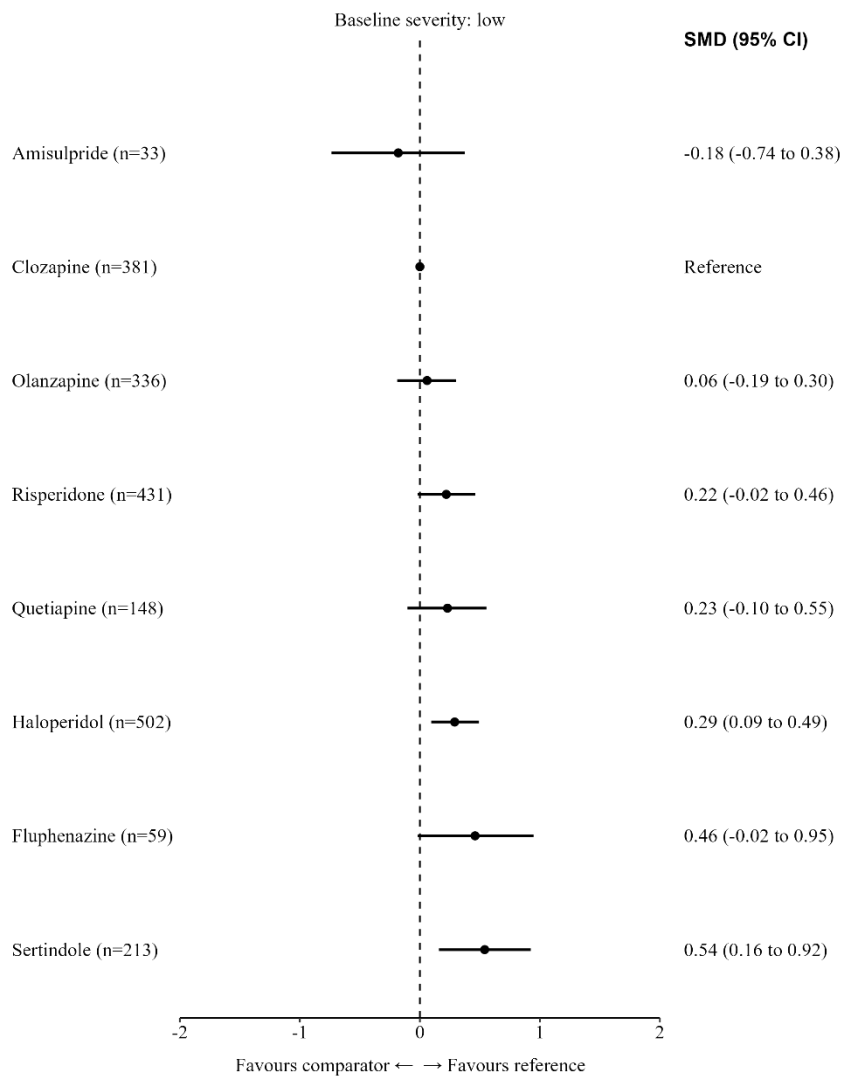

*Effect sizes, measured as standardized mean difference (SMD), are from the network meta-analysis. Order of treatments is according to the mean effect size. Reference is clozapine. The direction of the effect is indicated below the x-axis.*

### League table

|                               |                               |                               |                               |                               |                       |                       |                               |
|-------------------------------|-------------------------------|-------------------------------|-------------------------------|-------------------------------|-----------------------|-----------------------|-------------------------------|
| <b>Amisulpride</b>            | NA                            | -0.24 (-0.74 to 0.26)         | NA                            | NA                            | NA                    | NA                    | NA                            |
| -0.18 (-0.74 to 0.38)         | <b>Clozapine</b>              | -0.28 (-0.63 to 0.07)         | <b>-1.01 (-1.82 to -0.20)</b> | -0.18 (-0.55 to 0.20)         | -0.21 (-0.44 to 0.02) | NA                    | NA                            |
| -0.24 (-0.74 to 0.26)         | -0.06 (-0.30 to 0.19)         | <b>Olanzapine</b>             | -0.38 (-1.33 to 0.57)         | <b>-0.23 (-0.45 to -0.01)</b> | -0.36 (-0.85 to 0.12) | NA                    | NA                            |
| -0.41 (-1.03 to 0.21)         | -0.23 (-0.55 to 0.10)         | -0.17 (-0.54 to 0.20)         | <b>Quetiapine</b>             | -0.06 (-1.13 to 1.01)         | -0.14 (-0.44 to 0.15) | NA                    | NA                            |
| -0.40 (-0.94 to 0.14)         | -0.22 (-0.46 to 0.02)         | -0.17 (-0.37 to 0.04)         | 0.00 (-0.36 to 0.37)          | <b>Risperidone</b>            | -0.13 (-0.48 to 0.22) | NA                    | <b>-0.32 (-0.62 to -0.02)</b> |
| -0.47 (-1.04 to 0.09)         | <b>-0.29 (-0.49 to -0.09)</b> | -0.24 (-0.50 to 0.03)         | -0.07 (-0.35 to 0.21)         | -0.07 (-0.32 to 0.18)         | <b>Haloperidol</b>    | -0.17 (-0.61 to 0.27) | NA                            |
| -0.65 (-1.36 to 0.07)         | -0.46 (-0.95 to 0.02)         | -0.41 (-0.92 to 0.10)         | -0.24 (-0.76 to 0.28)         | -0.24 (-0.75 to 0.26)         | -0.17 (-0.61 to 0.27) | <b>Fluphenazine</b>   | NA                            |
| <b>-0.72 (-1.34 to -0.11)</b> | <b>-0.54 (-0.92 to -0.16)</b> | <b>-0.49 (-0.85 to -0.13)</b> | -0.32 (-0.78 to 0.15)         | <b>-0.32 (-0.62 to -0.02)</b> | -0.25 (-0.64 to 0.14) | -0.08 (-0.66 to 0.51) | <b>Sertindole</b>             |

Treatments are presented in order of efficacy ranking. Results of the network meta-analysis are reported in the left lower half and results of pairwise meta-analyses in the right upper half. Each cell provides the effect estimate and the corresponding 95% credible interval (95% CI) of a comparison (left lower half: treatment in column versus treatment in row; right upper half: treatment in row versus treatment in column). The type of effect size measure is standardized mean difference (SMD). Bold results indicate 95% CI excluding no effect. NA=not available.

## 12.6 Study duration

For the purpose of this analysis the median number of study duration was used.

### a Short

Number of studies:  $k = 21$

Number of pairwise comparisons:  $m = 21$

Number of treatments:  $n = 9$

Number of designs:  $d = 13$

### Network plot

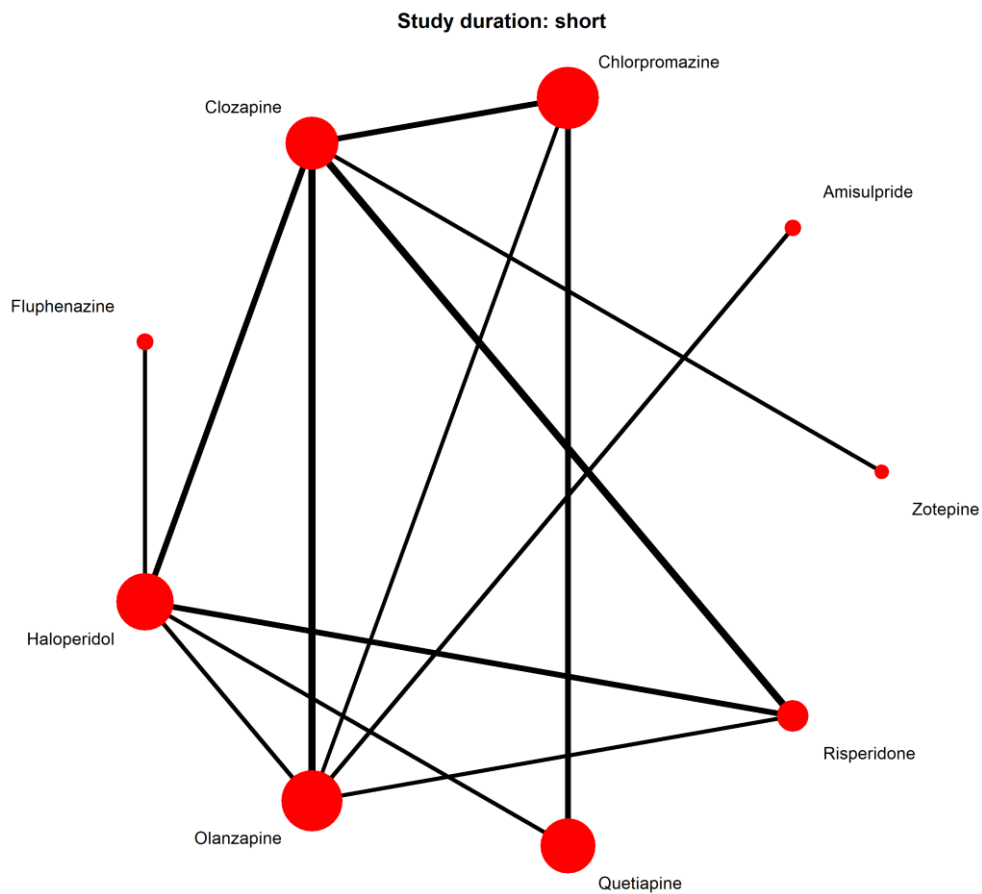

*Lines link treatments with direct comparisons in trials; thickness of lines corresponds to the number of trials evaluating the comparison; size of the nodes corresponds to the number of participants assigned to the treatment.*

| $\tau$ | P-value | Inconsistency loop (%) |
|--------|---------|------------------------|
| 0.2106 | 0.0370  | 30.0                   |

**Forest-plot of results of network meta-analysis for antipsychotic drugs versus clozapine**

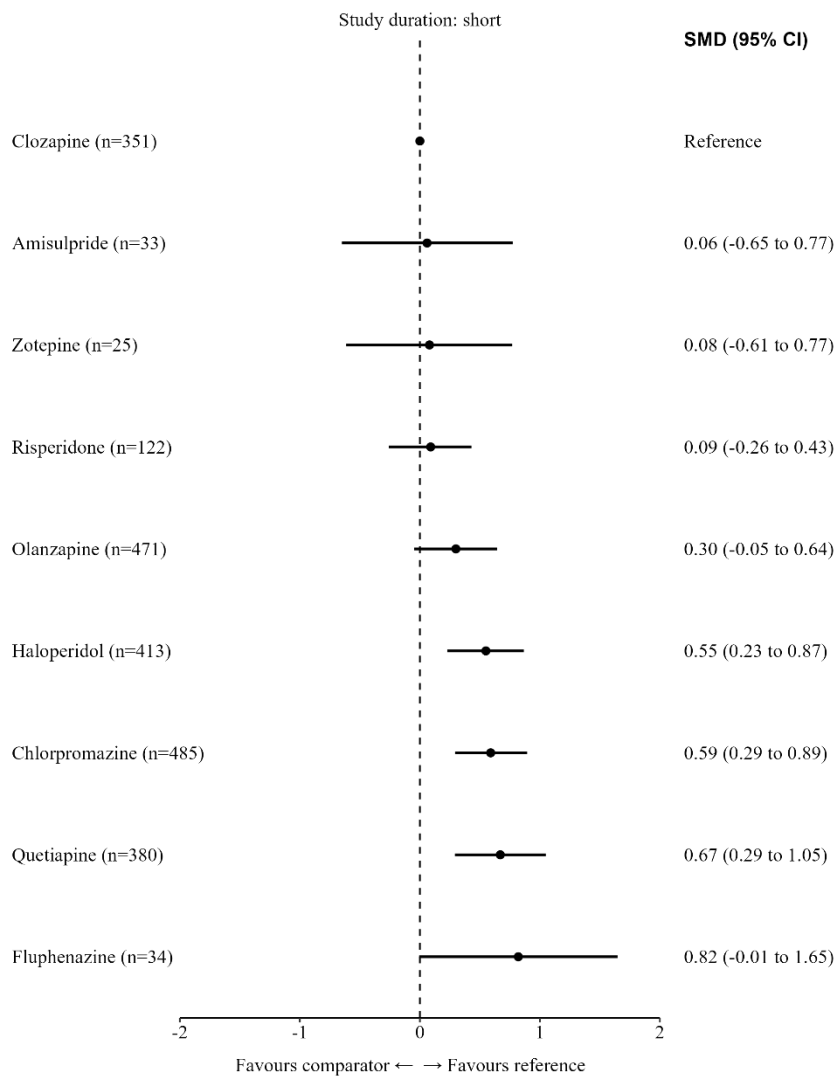

*Effect sizes, measured as standardized mean difference (SMD), are from the network meta-analysis. Order of treatments is according to the mean effect size. Reference is clozapine. The direction of the effect is indicated below the x-axis.*

### League table

|                               |                               |                       |                       |                       |                       |                               |                       |                       |
|-------------------------------|-------------------------------|-----------------------|-----------------------|-----------------------|-----------------------|-------------------------------|-----------------------|-----------------------|
| <b>Clozapine</b>              | 0.10 (-0.33 to 0.54)          | NA                    | -0.08 (-0.77 to 0.61) | -0.46 (-1.06 to 0.15) | -0.32 (-0.84 to 0.20) | <b>-0.78 (-1.14 to -0.41)</b> | NA                    | NA                    |
| -0.09 (-0.43 to 0.26)         | <b>Risperidone</b>            | NA                    | NA                    | 0.15 (-0.66 to 0.96)  | -0.33 (-0.88 to 0.22) | NA                            | NA                    | NA                    |
| -0.06 (-0.77 to 0.65)         | 0.02 (-0.72 to 0.77)          | <b>Amisulpride</b>    | NA                    | -0.24 (-0.86 to 0.39) | NA                    | NA                            | NA                    | NA                    |
| -0.08 (-0.77 to 0.61)         | 0.01 (-0.77 to 0.78)          | -0.02 (-1.01 to 0.98) | <b>Zotepine</b>       | NA                    | NA                    | NA                            | NA                    | NA                    |
| -0.30 (-0.64 to 0.05)         | -0.21 (-0.62 to 0.19)         | -0.24 (-0.86 to 0.39) | -0.22 (-0.99 to 0.55) | <b>Olanzapine</b>     | -0.27 (-0.72 to 0.18) | -0.22 (-0.82 to 0.39)         | NA                    | NA                    |
| <b>-0.55 (-0.87 to -0.23)</b> | <b>-0.46 (-0.83 to -0.09)</b> | -0.49 (-1.19 to 0.22) | -0.47 (-1.23 to 0.29) | -0.25 (-0.58 to 0.08) | <b>Haloperidol</b>    | NA                            | 0.14 (-0.33 to 0.62)  | -0.27 (-1.04 to 0.49) |
| <b>-0.59 (-0.89 to -0.29)</b> | <b>-0.51 (-0.93 to -0.09)</b> | -0.53 (-1.25 to 0.19) | -0.52 (-1.27 to 0.24) | -0.30 (-0.66 to 0.07) | -0.05 (-0.40 to 0.31) | <b>Chlorpromazine</b>         | -0.22 (-0.56 to 0.13) | NA                    |
| <b>-0.67 (-1.05 to -0.29)</b> | <b>-0.58 (-1.04 to -0.13)</b> | -0.61 (-1.36 to 0.14) | -0.59 (-1.38 to 0.20) | -0.37 (-0.79 to 0.05) | -0.12 (-0.48 to 0.24) | -0.08 (-0.38 to 0.23)         | <b>Quetiapine</b>     | NA                    |
| -0.82 (-1.65 to 0.01)         | -0.74 (-1.58 to 0.11)         | -0.76 (-1.80 to 0.28) | -0.74 (-1.82 to 0.34) | -0.52 (-1.36 to 0.31) | -0.27 (-1.04 to 0.49) | -0.23 (-1.07 to 0.61)         | -0.15 (-0.99 to 0.69) | <b>Fluphenazine</b>   |

Treatments are presented in order of efficacy ranking. Results of the network meta-analysis are reported in the left lower half and results of pairwise meta-analyses in the right upper half. Each cell provides the effect estimate and the corresponding 95% credible interval (95% CI) of a comparison (left lower half: treatment in column versus treatment in row; right upper half: treatment in row versus treatment in column). The type of effect size measure is standardized mean difference (SMD). Bold results indicate 95% CI excluding no effect. NA=not available.

**b Long**

Number of studies:  $k = 24$

Number of pairwise comparisons:  $m = 36$

Number of treatments:  $n = 10$

Number of designs:  $d = 16$

**Network plot**

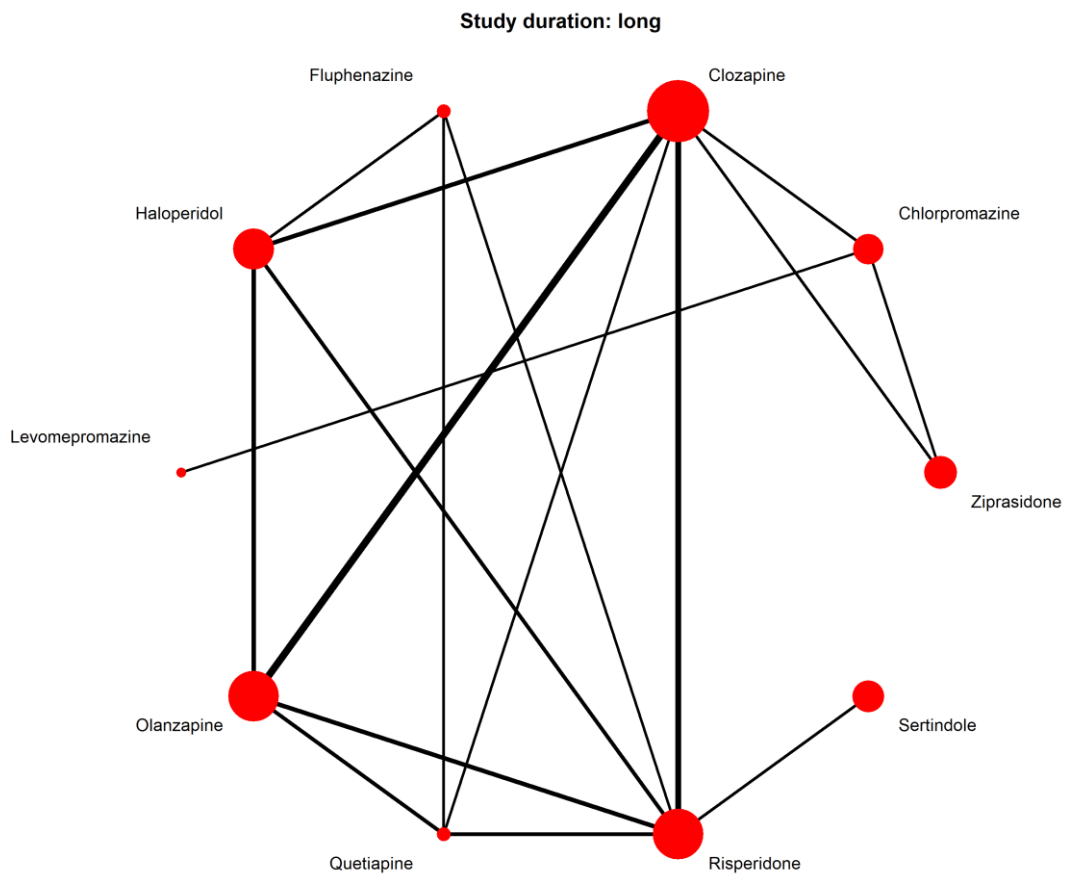

*Lines link treatments with direct comparisons in trials; thickness of lines corresponds to the number of trials evaluating the comparison; size of the nodes corresponds to the number of participants assigned to the treatment.*

| $\tau$ | P-value | Inconsistency loop (%) |
|--------|---------|------------------------|
| 0.0893 | 0.1223  | 26.67                  |

**Forest-plot of results of network meta-analysis for antipsychotic drugs versus clozapine**

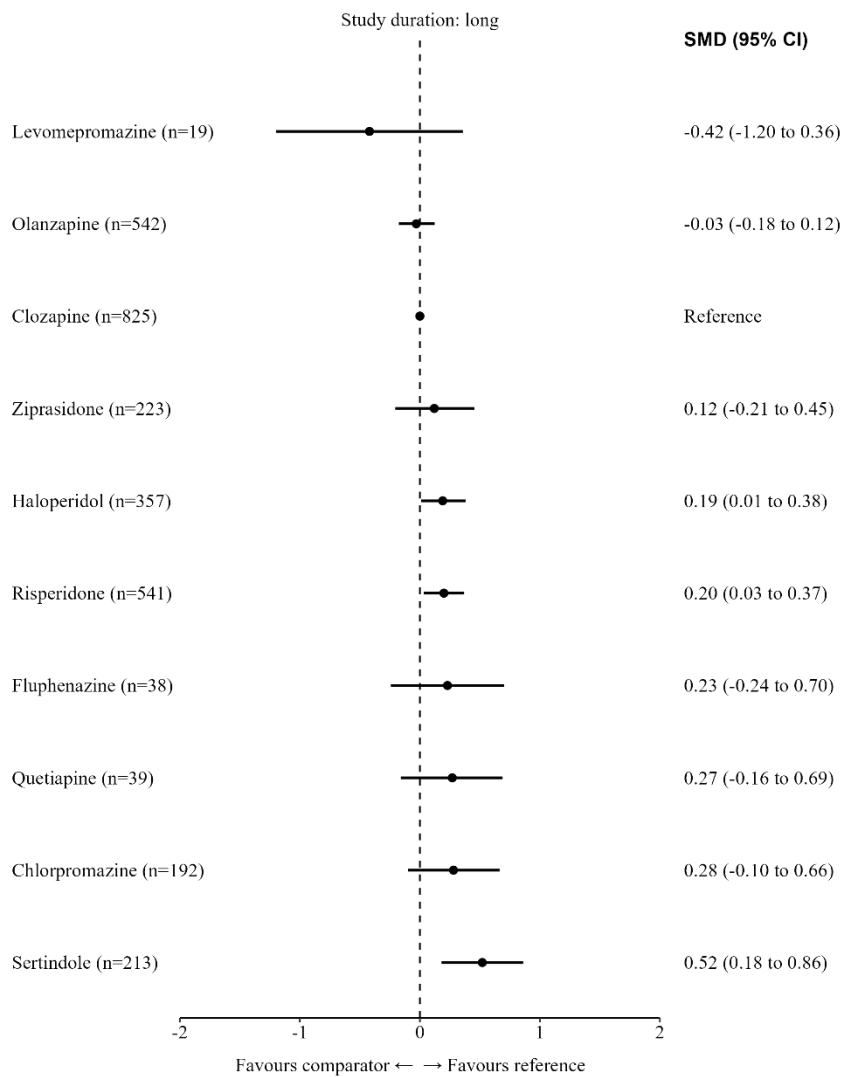

*Effect sizes, measured as standardized mean difference (SMD), are from the network meta-analysis. Order of treatments is according to the mean effect size. Reference is clozapine. The direction of the effect is indicated below the x-axis.*



### League table

|                               |                               |                               |                       |                       |                               |                       |                               |                               |                               |
|-------------------------------|-------------------------------|-------------------------------|-----------------------|-----------------------|-------------------------------|-----------------------|-------------------------------|-------------------------------|-------------------------------|
| Levomepromazine               | NA                            | NA                            | NA                    | NA                    | NA                            | NA                    | NA                            | <b>-0.70 (-1.38 to -0.02)</b> | NA                            |
| -0.39 (-1.19 to 0.40)         | <b>Olanzapine</b>             | -0.06 (-0.24 to 0.11)         | NA                    | -0.28 (-0.61 to 0.05) | <b>-0.24 (-0.47 to -0.01)</b> | NA                    | -0.06 (-0.59 to 0.48)         | NA                            | NA                            |
| -0.42 (-1.20 to 0.36)         | -0.03 (-0.18 to 0.12)         | <b>Clozapine</b>              | 0.02 (-0.35 to 0.39)  | -0.16 (-0.38 to 0.06) | -0.17 (-0.38 to 0.05)         | NA                    | <b>-1.01 (-1.82 to -0.20)</b> | <b>-0.76 (-1.42 to -0.09)</b> | NA                            |
| -0.54 (-1.27 to 0.18)         | -0.15 (-0.51 to 0.21)         | -0.12 (-0.45 to 0.21)         | <b>Ziprasidone</b>    | NA                    | NA                            | NA                    | NA                            | -0.07 (-0.36 to 0.21)         | NA                            |
| -0.62 (-1.42 to 0.19)         | <b>-0.22 (-0.43 to -0.01)</b> | <b>-0.19 (-0.38 to -0.01)</b> | -0.07 (-0.45 to 0.31) | <b>Haloperidol</b>    | 0.03 (-0.35 to 0.41)          | -0.09 (-0.67 to 0.49) | NA                            | NA                            | NA                            |
| -0.62 (-1.42 to 0.18)         | <b>-0.23 (-0.40 to -0.05)</b> | <b>-0.20 (-0.37 to -0.03)</b> | -0.07 (-0.45 to 0.30) | -0.00 (-0.22 to 0.22) | <b>Risperidone</b>            | 0.02 (-0.77 to 0.81)  | -0.06 (-0.70 to 0.59)         | NA                            | <b>-0.32 (-0.62 to -0.03)</b> |
| -0.65 (-1.56 to 0.26)         | -0.26 (-0.73 to 0.22)         | -0.23 (-0.70 to 0.24)         | -0.11 (-0.68 to 0.47) | -0.04 (-0.49 to 0.42) | -0.03 (-0.50 to 0.44)         | <b>Fluphenazine</b>   | -0.15 (-0.95 to 0.66)         | NA                            | NA                            |
| -0.69 (-1.57 to 0.20)         | -0.29 (-0.71 to 0.13)         | -0.27 (-0.69 to 0.16)         | -0.14 (-0.68 to 0.40) | -0.07 (-0.51 to 0.37) | -0.07 (-0.49 to 0.36)         | -0.04 (-0.60 to 0.53) | <b>Quetiapine</b>             | NA                            | NA                            |
| <b>-0.70 (-1.38 to -0.02)</b> | -0.31 (-0.72 to 0.10)         | -0.28 (-0.66 to 0.10)         | -0.16 (-0.42 to 0.11) | -0.09 (-0.51 to 0.34) | -0.08 (-0.50 to 0.34)         | -0.05 (-0.66 to 0.56) | -0.02 (-0.59 to 0.55)         | <b>Chlorpromazine</b>         | NA                            |
| <b>-0.94 (-1.79 to -0.09)</b> | <b>-0.55 (-0.89 to -0.20)</b> | <b>-0.52 (-0.86 to -0.18)</b> | -0.40 (-0.87 to 0.08) | -0.33 (-0.69 to 0.04) | <b>-0.32 (-0.62 to -0.03)</b> | -0.29 (-0.85 to 0.27) | -0.25 (-0.77 to 0.26)         | -0.24 (-0.75 to 0.27)         | <b>Sertindole</b>             |

Treatments are presented in order of efficacy ranking. Results of the network meta-analysis are reported in the left lower half and results of pairwise meta-analyses in the right upper half. Each cell provides the effect estimate and the corresponding 95% credible interval (95% CI) of a comparison (left lower half: treatment in column versus treatment in row; right upper half: treatment in row versus treatment in column). The type of effect size measure is standardized mean difference (SMD). Bold results indicate 95% CI excluding no effect. NA=not available.

## 13 Risk of bias Assessment

|                         | Risk of bias domains |    |    |    |    | Overall |
|-------------------------|----------------------|----|----|----|----|---------|
|                         | D1                   | D2 | D3 | D4 | D5 |         |
| Altamura 2002           | +                    | +  | X  | +  | +  | X       |
| AstraZeneca 50771L/0031 | +                    | +  | X  | +  | +  | X       |
| AstraZeneca 50771L/0054 | +                    | +  | X  | +  | +  | X       |
| Azorin 2001             | +                    | +  | -  | +  | +  | -       |
| Bitter 2004             | +                    | +  | -  | +  | +  | -       |
| Bondolfi 1998           | +                    | +  | -  | +  | +  | -       |
| Breier 1999             | -                    | +  | X  | +  | +  | X       |
| Breier 1999a            | +                    | +  | -  | +  | +  | -       |
| Buchanan 1998           | -                    | +  | X  | +  | +  | X       |
| Buchanan 2005           | -                    | +  | -  | +  | +  | -       |
| Chen 2012               | -                    | -  | -  | +  | +  | -       |
| Chowdhury 1999          | -                    | -  | -  | -  | +  | X       |
| Claus 1992              | +                    | +  | X  | +  | +  | X       |
| Conley 1998             | +                    | +  | -  | +  | +  | -       |
| Conley 2003             | -                    | +  | X  | +  | +  | X       |
| Conley 2005             | +                    | +  | X  | +  | +  | X       |
| Emsley 2000             | +                    | +  | -  | +  | +  | -       |
| Hall 1968               | -                    | +  | -  | +  | +  | -       |
| Hong 1997               | -                    | +  | -  | +  | +  | -       |
| Honigfeld 1984b         | +                    | +  | -  | +  | +  | -       |
| Kahn 2018               | +                    | X  | -  | +  | +  | X       |
| Kane 1988               | +                    | +  | -  | +  | +  | -       |
| Kane 2001               | +                    | X  | X  | +  | +  | X       |
| Kane 2006               | +                    | +  | -  | +  | +  | -       |
| Kane 2010b              | +                    | +  | -  | +  | +  | -       |
| Kinon 1993b             | -                    | -  | X  | +  | +  | X       |
| Kinon 2009              | +                    | +  | -  | +  | +  | -       |

Study

|                       |   |   |   |   |   |   |
|-----------------------|---|---|---|---|---|---|
| Kumra 1996            | + | + | X | + | + | X |
| Kumra 2007            | + | + | X | + | + | X |
| Lal 2006              | + | + | X | + | + | X |
| McEvoy 2006           | + | + | X | - | + | X |
| Meltzer 2008          | + | + | - | + | + | - |
| Meyer-Lindenberg 1997 | + | + | - | + | + | - |
| Moresco 2004          | + | X | X | + | + | X |
| Naber 2005            | + | + | X | + | + | X |
| Rosenheck 1997        | - | + | X | + | + | X |
| Sacchetti 2009        | + | + | - | + | + | - |
| Schooler 2016         | - | X | X | + | + | X |
| See 1999              | - | - | X | + | + | X |
| Shaw 2006             | + | + | - | + | + | - |
| Sirota 2006           | + | - | - | + | + | - |
| Tollefson 2001        | + | + | - | + | + | - |
| Volavka 2002          | - | + | - | + | + | - |
| Wahlbeck 2000         | + | - | X | + | + | X |
| Wirshing 1999         | + | + | - | + | + | - |

Domains:  
D1: Bias arising from the randomization process.  
D2: Bias due to deviations from intended intervention.  
D3: Bias due to missing outcome data.  
D4: Bias in measurement of the outcome.  
D5: Bias in selection of the reported result.

Judgement  
X High  
- Some concerns  
+ Low  
? No information  
Not applicable

## 14 Investigation of the small-study effect and publication bias

We investigated the presence of the small-study effect for the primary outcome of overall symptoms of schizophrenia. We used funnel plots for pairwise meta-analysis including 10 or more studies and comparison-adjusted funnel plots for network meta-analysis. In our study only one comparison, clozapine versus olanzapine, included 10 studies.

In comparison-adjusted funnel plots, comparisons have been directed according to the oldness and the effectiveness of the treatments: namely, all comparisons are “older interventions versus newer interventions” and “more efficacious interventions versus less efficacious interventions,” respectively. Each comparison is represented by a different colored symbol in the graph. The x-axis shows the difference between the study effect and the summary effect for each comparison, while the y-axis depicts the standard error of the observed effect size. Potential asymmetry would indicate a form of small-study effects depending on the defined direction, while symmetry in the funnel plot suggests lack of evidence of small-study effects. Egger’s tests for funnel plot asymmetry results are also presented.

Comparison-adjusted funnel plots suggest no clear indication of small-study effects in general. However, small-study effects could be suspected of clozapine-olanzapine studies according to the funnel plot for pairwise meta-analysis.

### Funnel plot of pairwise meta-analysis for clozapine and olanzapine

Potential missing studies on the right side of the figure would indicate that small studies are likely to provide larger effects in clozapine. The Egger's test shows the asymmetry is significant ( $p < 0.05$ ).

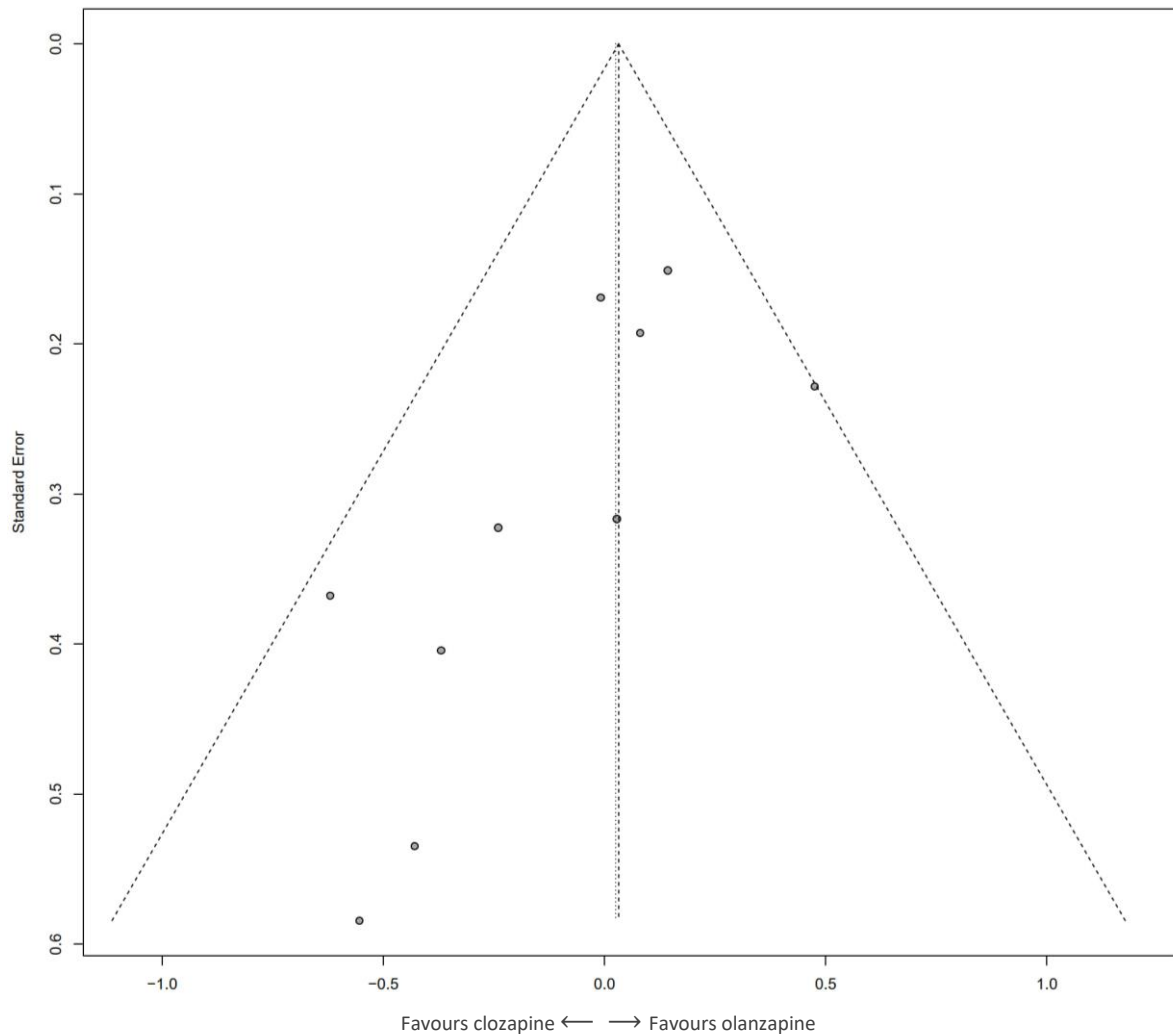

### Egger's test for funnel plot asymmetry

|       |    |         |
|-------|----|---------|
| t     | df | p-value |
| -2.51 | 8  | 0.0364  |

**Comparison-adjusted funnel plot for the primary outcome according to oldness of the treatment**

Potential missing studies on the left side of the figure would indicate that small studies are likely to provide larger effects for the newer interventions. However, the Egger’s test shows the asymmetry is not significant.

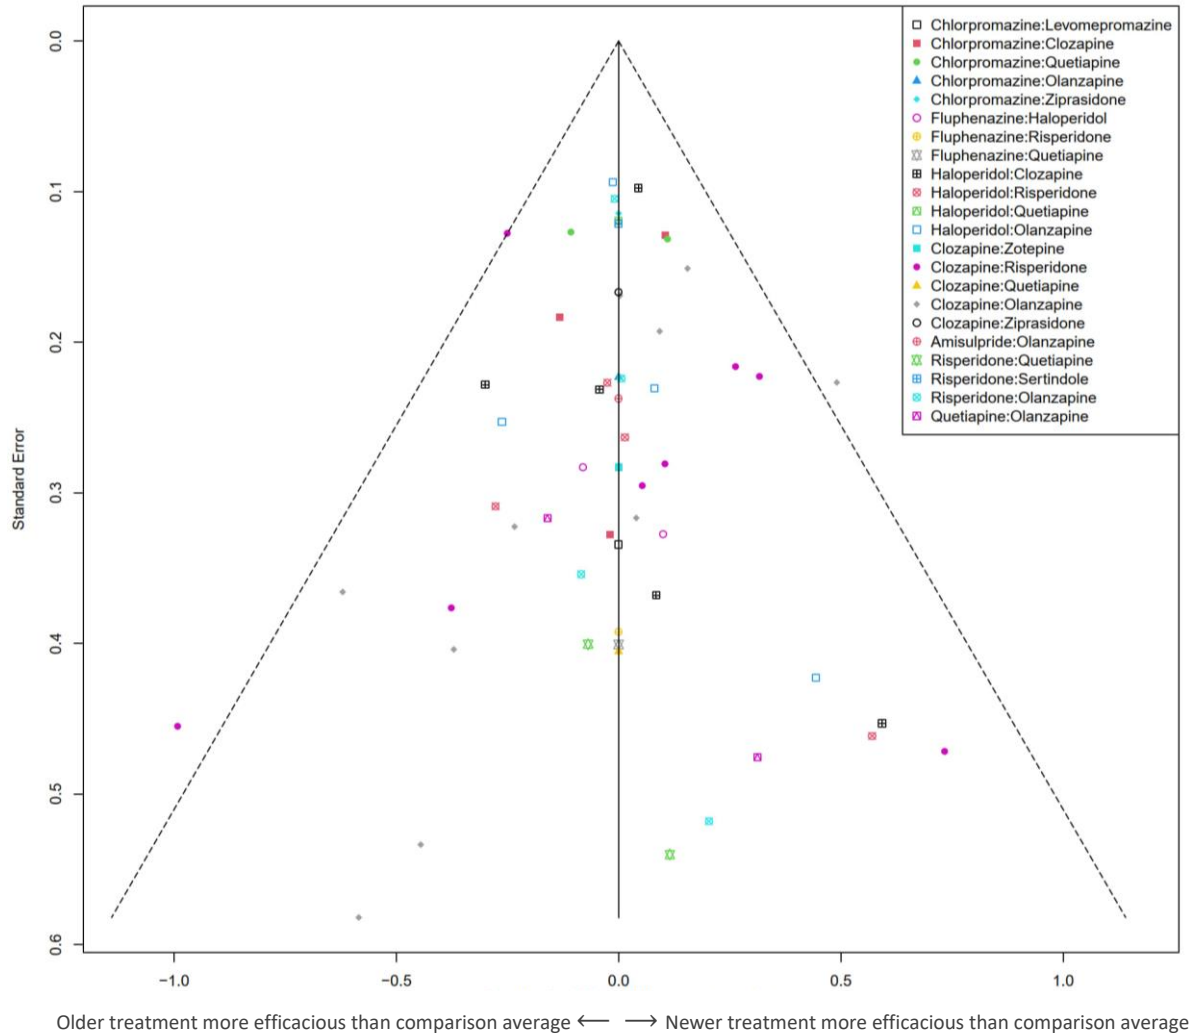

**Egger’s test for funnel plot asymmetry**

| t     | df | p-value |
|-------|----|---------|
| -0.25 | 55 | 0.8049  |

**Comparison-adjusted funnel plot for the primary outcome according to effectiveness of the treatment**

Potential missing studies on the right side of the figure would indicate that small studies are likely to provide larger effects for the more efficacious interventions. However, the Egger’s test shows the asymmetry is not significant.

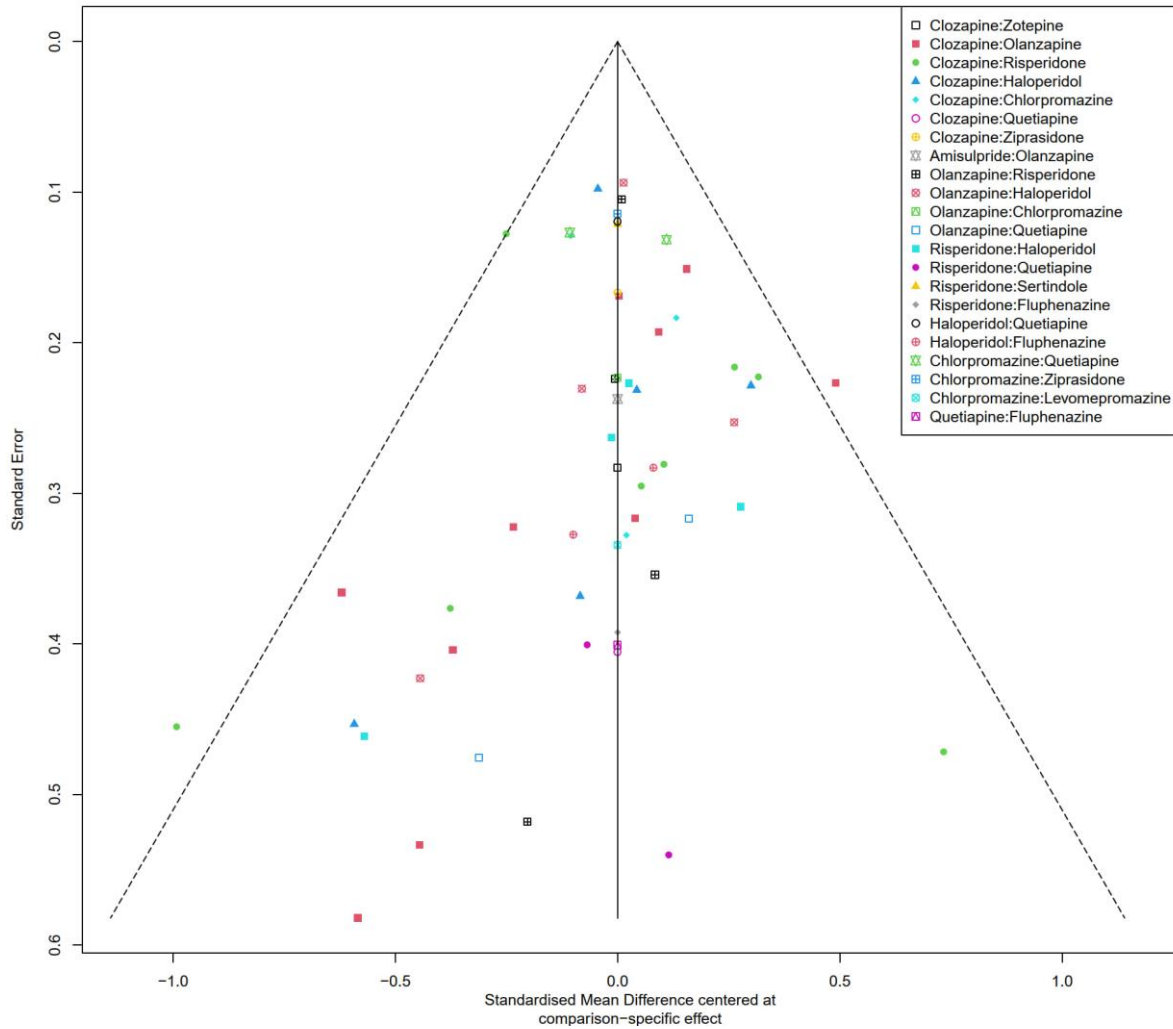

Treatment higher in the total ranking appears more efficacious than comparison average ← → Treatment lower in the total ranking appears more efficacious than comparison average

**Egger’s test for funnel plot asymmetry**

| t     | df | p-value |
|-------|----|---------|
| -1.02 | 55 | 0.3120  |

## 15 Evaluating the confidence in NMA: CINeMA

We evaluated the confidence in evidence of network meta-analytic estimates for the primary outcome with Confidence in Network Meta-Analysis (CINeMA) framework<sup>81</sup> and the official online tool (<https://cinema.ispm.unibe.ch/>). The CINeMA framework considers six domains that affect the level of confidence in the NMA results: within-study bias, reporting bias, indirectness, imprecision, heterogeneity, and incoherence. These domains are evaluated for each comparison, which subsequently determine an overall confidence in evidence for a comparison. The tool estimates the contribution of each study to the effect size of a comparison using original data and then calculates a contribution matrix. Therefore, some settings and judgements need to be given, which we report in the following.

### **Domain 1: Within-study bias**

We assessed within-study bias using the overall risk of bias rating from the Cochrane's RoB 2.0. Within-study bias for each comparison was classified into "no concerns," "some concerns," and "major concerns" based on the average overall risk of bias according to the contribution matrix.

### **Domain 2: Reporting bias**

We assessed reporting bias using ROB-MEN (Risk of Bias due to Missing Evidence in Network meta-analysis).<sup>83</sup> ROB-MEN, as part of the CINeMA framework, is a web application (<https://cinema.ispm.unibe.ch/rob-men/>) that simplifies the evaluation of risk of bias due to missing evidence in the estimates from network meta-analysis. The tool has two core parts: the Pairwise Comparisons table and the ROB-MEN table. After the assessment within both tables, a level of "low risk," "some concerns," or "high risk" for the bias due to missing evidence is assigned to each comparison as the final output. Judgements were given based on the recommendations in the guideline<sup>83</sup> and were reported in Appendix 16 ROB-MEN.

### **Domain 3: Indirectness**

For indirectness, it should be judged whether study populations, interventions, outcomes, and study settings are representative of the ones relevant for the research questions. In the cases of the studies included in the present review, the inclusion criteria led to a selection of studies in which these characteristics are directly relevant for the research question, so no indirectness is identified. Details are provided below.

**Population:** We included only studies in participants with a treatment-resistant form of schizophrenia, schizoaffective disorder, or schizophreniform disorder. Therefore, we consider the study populations as directly relevant for the research question.

**Intervention:** All investigated interventions were licensed antipsychotics or placebo and thus directly relevant for the research question.

**Outcome:** Only validated scales, measuring overall symptom of schizophrenia, were used for the primary outcome and are thus relevant for the research question.

**Setting:** We included studies conducted with out-patients, in-patients, or both. The baseline severity of patients with treatment-resistant schizophrenia is varied. In some studies, patients had symptoms and required rehospitalizations, but in other studies patients were not so symptomatic and were treated as outpatients. Therefore, all these settings can be relevant to the research question.

### **Domain 4: Imprecision**

This domain requires setting thresholds for clinically important differences between the interventions. We considered standardized mean differences (SMDs) outside the range -0.1 to +0.1 as clinically important.

### **Domain 5: Heterogeneity**



We considered standardized mean differences (SMDs) outside the range -0.1 to +0.1 as clinically important. Heterogeneity was evaluated based on the relation of both the 95% confidence intervals and the 95% prediction intervals, with the clinically meaningful threshold defined above in the domain of imprecision according to CINeMA documentation.<sup>82</sup> Comparisons could be classified according to heterogeneity evaluation as “no concerns,” “some concerns,” and “major concerns.”

### **Domain 6: Incoherence**

We considered standardized mean differences (SMDs) outside the range -0.1 to +0.1 as clinically important. Incoherence was evaluated using a design-by-treatment test (for comparisons with only direct or indirect evidence) and the SIDE approach (when both direct and indirect evidence was available) according to CINeMA documentation.<sup>82</sup> Comparisons could be classified according to incoherence evaluation as “no concerns,” “some concerns,” and “major concerns.”

### **Overall confidence**

In CINeMA, judgments for each domain can be summarized in an overall judgment on the confidence in the NMA estimate for each comparison. The level of confidence in the estimate can be classified as “very low,” “low,” “moderate,” and “high.” The meaning of these four levels can be interpreted as follows:

- High quality: Further research is very unlikely to change our confidence in the estimate of effect.
- Moderate quality: Further research is likely to have an important impact on our confidence in the estimate of effect and may change the estimate.
- Low quality: Further research is very likely to have an important impact on our confidence in the estimate of effect and is likely to change the estimate.
- Very low quality: We are very uncertain about the estimate.

The CINeMA-guidance document<sup>82</sup> suggests starting at the first level (i.e., high) for each comparison and to downgrade for one level for a rating of “some concerns,” and by two levels for a rating of “major concerns.” In the case that several domains are at the level of some concerns or major concerns, it is recommended to consider judgements on different domains jointly rather than in isolation. The reason is that domains are interconnected and downgrading more than once for related concerns should be avoided. The following examples are given in the guidance document: Indirectness includes considerations on intransitivity, which manifests itself in the data as statistical incoherence. Heterogeneity will increase imprecision in treatment effects and may be related to variability in within-study bias or the presence of reporting bias.) Based on these recommendations, we used the following approach that was reported in two previous network meta-analysis studies<sup>84,85</sup> to reach an overall level of confidence for each comparison:

- One judgement of “some concerns” leads to downgrading by one level.
- One judgement of “major concerns” leads to downgrading by two levels.
- Two judgements of “some concerns” could be interconnected and do not justify downgrading more than by one level.
- One judgement of “major concerns” and up to two judgements of “some concerns” or one additional judgement of “major concerns” could be interconnected and do not justify downgrading by more than two levels.
- Two judgements of “major concerns” and any additional judgements of “some concerns” or “major concerns” (or more than four judgements of some concerns) lead to downgrading by three levels.

## Confidence in the estimates for the primary outcomes

| Comparison                        | Number of Studies | Within-study bias | Reporting bias | Indirectness | Imprecision    | Heterogeneity  | Incoherence    | Confidence rating | Reason(s) for downgrading |
|-----------------------------------|-------------------|-------------------|----------------|--------------|----------------|----------------|----------------|-------------------|---------------------------|
| Mixed evidence                    |                   |                   |                |              |                |                |                |                   |                           |
| Amisulpride vs Olanzapine         | 1                 | Major concerns    | Low risk       | No concerns  | Major concerns | No concerns    | Major concerns | Very low          |                           |
| Chlorpromazine vs Clozapine       | 3                 | Some concerns     | Low risk       | No concerns  | No concerns    | No concerns    | Major concerns | Low               |                           |
| Chlorpromazine vs Levomepromazine | 1                 | Major concerns    | Low risk       | No concerns  | Some concerns  | Some concerns  | Major concerns | Very low          |                           |
| Chlorpromazine vs Olanzapine      | 1                 | Some concerns     | Low risk       | No concerns  | No concerns    | Some concerns  | No concerns    | Moderate          |                           |
| Chlorpromazine vs Quetiapine      | 2                 | Major concerns    | Low risk       | No concerns  | Major concerns | No concerns    | Major concerns | Very low          |                           |
| Chlorpromazine vs Ziprasidone     | 1                 | Some concerns     | Low risk       | No concerns  | Some concerns  | Some concerns  | No concerns    | Low               |                           |
| Clozapine vs Haloperidol          | 5                 | Major concerns    | Low risk       | No concerns  | No concerns    | Some concerns  | No concerns    | Low               |                           |
| Clozapine vs Olanzapine           | 10                | Some concerns     | Low risk       | No concerns  | Major concerns | No concerns    | No concerns    | Low               |                           |
| Clozapine vs Quetiapine           | 1                 | Some concerns     | Low risk       | No concerns  | No concerns    | No concerns    | No concerns    | Moderate          |                           |
| Clozapine vs Risperidone          | 8                 | Some concerns     | Low risk       | No concerns  | Some concerns  | Some concerns  | No concerns    | Low               |                           |
| Clozapine vs Ziprasidone          | 1                 | Some concerns     | Low risk       | No concerns  | Major concerns | No concerns    | No concerns    | Low               |                           |
| Clozapine vs Zotepine             | 1                 | Some concerns     | Low risk       | No concerns  | Major concerns | No concerns    | Major concerns | Very low          |                           |
| Fluphenazine vs Haloperidol       | 2                 | Major concerns    | Low risk       | No concerns  | Major concerns | No concerns    | No concerns    | Low               |                           |
| Fluphenazine vs Quetiapine        | 1                 | Major concerns    | Low risk       | No concerns  | Major concerns | No concerns    | No concerns    | Low               |                           |
| Fluphenazine vs Risperidone       | 1                 | Major concerns    | Low risk       | No concerns  | Major concerns | No concerns    | No concerns    | Low               |                           |
| Haloperidol vs Olanzapine         | 4                 | Some concerns     | Low risk       | No concerns  | No concerns    | Major concerns | No concerns    | Low               |                           |
| Haloperidol vs Quetiapine         | 1                 | Some concerns     | Low risk       | No concerns  | Major concerns | No concerns    | Some concerns  | Low               |                           |
| Haloperidol vs Risperidone        | 4                 | Some concerns     | Some concerns  | No concerns  | Some concerns  | Some concerns  | No concerns    | Low               |                           |
| Olanzapine vs Quetiapine          | 2                 | Some concerns     | Low risk       | No concerns  | No concerns    | Some concerns  | No concerns    | Moderate          |                           |
| Olanzapine vs Risperidone         | 4                 | Some concerns     | Low risk       | No concerns  | Some concerns  | Some concerns  | No concerns    | Low               |                           |
| Quetiapine vs Risperidone         | 2                 | Some concerns     | Low risk       | No concerns  | Some concerns  | Some concerns  | No concerns    | Low               |                           |
| Risperidone vs Sertindole         | 1                 | Some concerns     | Low risk       | No concerns  | Some concerns  | Some concerns  | Major concerns | Very low          |                           |
| Indirect evidence                 |                   |                   |                |              |                |                |                |                   |                           |
| Amisulpride vs Chlorpromazine     | --                | Major concerns    | Low risk       | No concerns  | Some concerns  | Some concerns  | Major concerns | Very low          |                           |
| Amisulpride vs Clozapine          | --                | Major concerns    | Low risk       | No concerns  | Major concerns | No concerns    | Major concerns | Very low          |                           |
| Amisulpride vs Fluphenazine       | --                | Major concerns    | Low risk       | No concerns  | Major concerns | No concerns    | Major concerns | Very low          |                           |
| Amisulpride vs Haloperidol        | --                | Major concerns    | Low risk       | No concerns  | Major concerns | No concerns    | Major concerns | Very low          |                           |
| Amisulpride vs Levomepromazine    | --                | Major concerns    | Low risk       | No concerns  | Major concerns | No concerns    | Major concerns | Very low          |                           |
| Amisulpride vs Quetiapine         | --                | Major concerns    | Low risk       | No concerns  | Some concerns  | Some concerns  | Major concerns | Very low          |                           |
| Amisulpride vs Risperidone        | --                | Major concerns    | Low risk       | No concerns  | Major concerns | No concerns    | Major concerns | Very low          |                           |
| Amisulpride vs Sertindole         | --                | Some concerns     | Low risk       | No concerns  | Some concerns  | Some concerns  | Major concerns | Very low          |                           |
| Amisulpride vs Ziprasidone        | --                | Some concerns     | Low risk       | No concerns  | Major concerns | No concerns    | Major concerns | Very low          |                           |
| Amisulpride vs Zotepine           | --                | Some concerns     | Low risk       | No concerns  | Major concerns | No concerns    | Major concerns | Very low          |                           |
| Chlorpromazine vs Fluphenazine    | --                | Major concerns    | Low risk       | No concerns  | Major concerns | No concerns    | Major concerns | Very low          |                           |
| Chlorpromazine vs Haloperidol     | --                | Some concerns     | Low risk       | No concerns  | Major concerns | No concerns    | Major concerns | Very low          |                           |
| Chlorpromazine vs Risperidone     | --                | Some concerns     | Low risk       | No concerns  | No concerns    | Major concerns | Major concerns | Very low          |                           |
| Chlorpromazine vs Sertindole      | --                | Some concerns     | Low risk       | No concerns  | Major concerns | No concerns    | Major concerns | Very low          |                           |
| Chlorpromazine vs Zotepine        | --                | Some concerns     | Low risk       | No concerns  | Major concerns | No concerns    | Major concerns | Very low          |                           |
| Clozapine vs Fluphenazine         | --                | Major concerns    | Low risk       | No concerns  | Some concerns  | Some concerns  | Major concerns | Very low          |                           |
| Clozapine vs Levomepromazine      | --                | Major concerns    | Low risk       | No concerns  | Major concerns | No concerns    | Major concerns | Very low          |                           |
| Clozapine vs Sertindole           | --                | Some concerns     | Low risk       | No concerns  | No concerns    | Major concerns | Major concerns | Very low          |                           |
| Fluphenazine vs Levomepromazine   | --                | Major concerns    | Low risk       | No concerns  | Major concerns | No concerns    | Major concerns | Very low          |                           |
| Fluphenazine vs Olanzapine        | --                | Some concerns     | Low risk       | No concerns  | Some concerns  | Some concerns  | Major concerns | Very low          |                           |
| Fluphenazine vs Sertindole        | --                | Some concerns     | Low risk       | No concerns  | Major concerns | No concerns    | Major concerns | Very low          |                           |
| Fluphenazine vs Ziprasidone       | --                | Some concerns     | Low risk       | No concerns  | Major concerns | No concerns    | Major concerns | Very low          |                           |
| Fluphenazine vs Zotepine          | --                | Some concerns     | Low risk       | No concerns  | Major concerns | No concerns    | Major concerns | Very low          |                           |
| Haloperidol vs Levomepromazine    | --                | Major concerns    | Low risk       | No concerns  | Major concerns | No concerns    | Major concerns | Very low          |                           |
| Haloperidol vs Sertindole         | --                | Some concerns     | Low risk       | No concerns  | Major concerns | No concerns    | Major concerns | Very low          |                           |
| Haloperidol vs Ziprasidone        | --                | Some concerns     | Low risk       | No concerns  | Major concerns | No concerns    | Major concerns | Very low          |                           |
| Haloperidol vs Zotepine           | --                | Some concerns     | Low risk       | No concerns  | Major concerns | No concerns    | Major concerns | Very low          |                           |
| Levomepromazine vs Olanzapine     | --                | Major concerns    | Low risk       | No concerns  | Major concerns | No concerns    | Major concerns | Very low          |                           |
| Levomepromazine vs Quetiapine     | --                | Major concerns    | Low risk       | No concerns  | Some concerns  | Some concerns  | Major concerns | Very low          |                           |

|                                |    |                |          |             |                |               |                |          |  |
|--------------------------------|----|----------------|----------|-------------|----------------|---------------|----------------|----------|--|
| Levomepromazine vs Risperidone | -- | Major concerns | Low risk | No concerns | Major concerns | No concerns   | Major concerns | Very low |  |
| Levomepromazine vs Sertindole  | -- | Some concerns  | Low risk | No concerns | Major concerns | No concerns   | Major concerns | Very low |  |
| Levomepromazine vs Ziprasidone | -- | Some concerns  | Low risk | No concerns | Major concerns | No concerns   | Major concerns | Very low |  |
| Levomepromazine vs Zotepine    | -- | Some concerns  | Low risk | No concerns | Major concerns | No concerns   | Major concerns | Very low |  |
| Olanzapine vs Sertindole       | -- | Some concerns  | Low risk | No concerns | Some concerns  | Some concerns | Major concerns | Very low |  |
| Olanzapine vs Ziprasidone      | -- | Some concerns  | Low risk | No concerns | Major concerns | No concerns   | Major concerns | Very low |  |
| Olanzapine vs Zotepine         | -- | Some concerns  | Low risk | No concerns | Major concerns | No concerns   | Major concerns | Very low |  |
| Quetiapine vs Sertindole       | -- | Some concerns  | Low risk | No concerns | Major concerns | No concerns   | Major concerns | Very low |  |
| Quetiapine vs Ziprasidone      | -- | Some concerns  | Low risk | No concerns | Major concerns | No concerns   | Major concerns | Very low |  |
| Quetiapine vs Zotepine         | -- | Some concerns  | Low risk | No concerns | Major concerns | No concerns   | Major concerns | Very low |  |
| Risperidone vs Ziprasidone     | -- | Some concerns  | Low risk | No concerns | Major concerns | No concerns   | Major concerns | Very low |  |
| Risperidone vs Zotepine        | -- | Some concerns  | Low risk | No concerns | Major concerns | No concerns   | Major concerns | Very low |  |
| Sertindole vs Ziprasidone      | -- | Some concerns  | Low risk | No concerns | Major concerns | No concerns   | Major concerns | Very low |  |
| Sertindole vs Zotepine         | -- | Some concerns  | Low risk | No concerns | Major concerns | No concerns   | Major concerns | Very low |  |
| Ziprasidone vs Zotepine        | -- | Some concerns  | Low risk | No concerns | Major concerns | No concerns   | Major concerns | Very low |  |

## 16 ROB-MEN

In the Pairwise Comparisons table, judgements need to be given in two columns: within-study assessment of bias and across-study assessment of bias. Then the overall bias of this table is given automatically. For the ROB-MEN Table, evaluation of contribution from evidence with suspected bias and evaluation of small-study effects require judgements, and overall risk of bias is also automatically given. We report the details in the following.

### ***Within-study assessment of bias***

*No bias detected* was given if no study was suspected of selective non-reporting or under-reporting of results for a specific comparison. Otherwise, we assessed each study for the presence of selective non-reporting of results. Then, we assessed the potential impact of the missing results across all studies using two signaling questions<sup>83</sup> to reach an overall judgement of *no bias detected* or *suspected bias favoring X* for each comparison.

We found three comparisons to be potentially biased because the extra studies did not report the full results and were sponsored by the company manufacturing the drug favored by the bias. For the rest comparisons, the extra studies were either small-studies that were not sufficient to have a notable effect on the overall result or studies that used other primary outcomes instead of overall symptoms.

### ***Across-study assessment of bias***

For this situation, it should be evaluated whether there are studies undertaken but not published (publication bias) for each comparison. We assigned *no bias detected* for risk of publication bias to all comparisons because (i) we hypothesized that studies for patients with treatment-resistant schizophrenia are hard to conduct; therefore, there should not be more studies that are not published, especially after the comprehensive search for both published and unpublished studies; (ii) two comparison-adjusted funnel plots and their Egger's test results did not indicate clear evidence for missing small-studies.

### ***Overall bias of Pairwise Comparisons Table***

| Pairwise comparison                       | Number of studies in each comparison |                                                | Within-study assessment of bias    | Across-study assessment of bias | Overall judgement                  |
|-------------------------------------------|--------------------------------------|------------------------------------------------|------------------------------------|---------------------------------|------------------------------------|
|                                           | Reporting this outcome (sample size) | Total identified in the SR (total sample size) | set all to "No bias"               | set all to "No bias"            | calculate overall judgement        |
| <b>Group A: observed for this outcome</b> |                                      |                                                |                                    |                                 |                                    |
| 1 Amisulpride:Olanzapine                  | 1 (72)                               | 1 (72)                                         | No bias detected                   | No bias detected                | No bias detected                   |
| 2 Chlorpromazine:Clozapine                | 3 (430)                              | 3 (430)                                        | No bias detected                   | No bias detected                | No bias detected                   |
| 3 Chlorpromazine:Levomopromazine          | 1 (38)                               | 1 (38)                                         | No bias detected                   | No bias detected                | No bias detected                   |
| 4 Chlorpromazine:Olanzapine               | 1 (81)                               | 1 (81)                                         | No bias detected                   | No bias detected                | No bias detected                   |
| 5 Chlorpromazine:Placebo                  | 1 (40)                               | 4 (108)                                        | No bias detected                   | No bias detected                | No bias detected                   |
| 6 Chlorpromazine:Quetiapine               | 2 (484)                              | 2 (484)                                        | No bias detected                   | No bias detected                | No bias detected                   |
| 7 Chlorpromazine:Sulpiride                | 1 (75)                               | 1 (75)                                         | No bias detected                   | No bias detected                | No bias detected                   |
| 8 Chlorpromazine:Thioridazine             | 1 (40)                               | 1 (40)                                         | No bias detected                   | No bias detected                | No bias detected                   |
| 9 Chlorpromazine:Trifluoperazine          | 1 (40)                               | 1 (40)                                         | No bias detected                   | No bias detected                | No bias detected                   |
| 10 Chlorpromazine:Ziprasidone             | 1 (306)                              | 1 (306)                                        | No bias detected                   | No bias detected                | No bias detected                   |
| 11 Clozapine:Haloperidol                  | 5 (630)                              | 6 (630)                                        | No bias detected                   | No bias detected                | No bias detected                   |
| 12 Clozapine:Olanzapine                   | 10 (678)                             | 13 (678)                                       | No bias detected                   | No bias detected                | No bias detected                   |
| 13 Clozapine:Quetiapine                   | 1 (41)                               | 2 (41)                                         | Suspected bias favouring Clozapine | No bias detected                | Suspected bias favouring Clozapine |
| 14 Clozapine:Risperidone                  | 8 (601)                              | 10 (621)                                       | No bias detected                   | No bias detected                | No bias detected                   |

|                                             |                              |         |         |                                      |                  |                                      |
|---------------------------------------------|------------------------------|---------|---------|--------------------------------------|------------------|--------------------------------------|
| 15                                          | Clozapine:Ziprasidone        | 1 (144) | 1 (144) | No bias detected                     | No bias detected | No bias detected                     |
| 16                                          | Clozapine:Zotepine           | 1 (50)  | 1 (50)  | No bias detected                     | No bias detected | No bias detected                     |
| 17                                          | Fluphenazine:Haloperidol     | 2 (97)  | 2 (97)  | No bias detected                     | No bias detected | No bias detected                     |
| 18                                          | Fluphenazine:Quetiapine      | 1 (25)  | 1 (25)  | No bias detected                     | No bias detected | No bias detected                     |
| 19                                          | Fluphenazine:Risperidone     | 1 (26)  | 1 (26)  | No bias detected                     | No bias detected | No bias detected                     |
| 20                                          | Haloperidol:Olanzapine       | 4 (679) | 5 (717) | No bias detected                     | No bias detected | No bias detected                     |
| 21                                          | Haloperidol:Quetiapine       | 1 (281) | 1 (281) | No bias detected                     | No bias detected | No bias detected                     |
| 22                                          | Haloperidol:Risperidone      | 4 (198) | 6 (198) | Suspected bias favouring Risperidone | No bias detected | Suspected bias favouring Risperidone |
| 23                                          | Olanzapine:Quetiapine        | 2 (58)  | 3 (83)  | No bias detected                     | No bias detected | No bias detected                     |
| 24                                          | Olanzapine:Risperidone       | 4 (496) | 6 (770) | No bias detected                     | No bias detected | No bias detected                     |
| 25                                          | Placebo:Thioridazine         | 1 (40)  | 1 (40)  | No bias detected                     | No bias detected | No bias detected                     |
| 26                                          | Placebo:Trifluoperazine      | 1 (40)  | 2 (90)  | No bias detected                     | No bias detected | No bias detected                     |
| 27                                          | Quetiapine:Risperidone       | 2 (39)  | 3 (61)  | No bias detected                     | No bias detected | No bias detected                     |
| 28                                          | Risperidone:Sertindole       | 1 (315) | 1 (315) | No bias detected                     | No bias detected | No bias detected                     |
| 29                                          | Thioridazine:Trifluoperazine | 1 (40)  | 1 (40)  | No bias detected                     | No bias detected | No bias detected                     |
| <b>Group B: observed for other outcomes</b> |                              |         |         |                                      |                  |                                      |
| 30                                          | Chlorpromazine:Haloperidol   | NA (NA) | 2 (47)  | No bias detected                     | No bias detected | No bias detected                     |
| 31                                          | Chlorpromazine:Risperidone   | NA (NA) | 1 (27)  | No bias detected                     | No bias detected | No bias detected                     |
| 32                                          | Haloperidol:Levomepromazine  | NA (NA) | 1 (39)  | No bias detected                     | No bias detected | No bias detected                     |
| 33                                          | Haloperidol:Placebo          | NA (NA) | 3 (57)  | Suspected bias favouring Haloperidol | No bias detected | Suspected bias favouring Haloperidol |
| <b>Group C: unobserved</b>                  |                              |         |         |                                      |                  |                                      |
| 34                                          | Amisulpride:Chlorpromazine   | NA (NA) | NA (NA) | No bias detected                     | No bias detected | No bias detected                     |
| 35                                          | Amisulpride:Clozapine        | NA (NA) | NA (NA) | No bias detected                     | No bias detected | No bias detected                     |
| 36                                          | Amisulpride:Fluphenazine     | NA (NA) | NA (NA) | No bias detected                     | No bias detected | No bias detected                     |
| 37                                          | Amisulpride:Haloperidol      | NA (NA) | NA (NA) | No bias detected                     | No bias detected | No bias detected                     |
| 38                                          | Amisulpride:Levomepromazine  | NA (NA) | NA (NA) | No bias detected                     | No bias detected | No bias detected                     |
| 39                                          | Amisulpride:Placebo          | NA (NA) | NA (NA) | No bias detected                     | No bias detected | No bias detected                     |
| 40                                          | Amisulpride:Quetiapine       | NA (NA) | NA (NA) | No bias detected                     | No bias detected | No bias detected                     |
| 41                                          | Amisulpride:Risperidone      | NA (NA) | NA (NA) | No bias detected                     | No bias detected | No bias detected                     |
| 42                                          | Amisulpride:Sertindole       | NA (NA) | NA (NA) | No bias detected                     | No bias detected | No bias detected                     |
| 43                                          | Amisulpride:Sulpiride        | NA (NA) | NA (NA) | No bias detected                     | No bias detected | No bias detected                     |
| 44                                          | Amisulpride:Thioridazine     | NA (NA) | NA (NA) | No bias detected                     | No bias detected | No bias detected                     |
| 45                                          | Amisulpride:Trifluoperazine  | NA (NA) | NA (NA) | No bias detected                     | No bias detected | No bias detected                     |
| 46                                          | Amisulpride:Ziprasidone      | NA (NA) | NA (NA) | No bias detected                     | No bias detected | No bias detected                     |
| 47                                          | Amisulpride:Zotepine         | NA (NA) | NA (NA) | No bias detected                     | No bias detected | No bias detected                     |
| 48                                          | Chlorpromazine:Fluphenazine  | NA (NA) | NA (NA) | No bias detected                     | No bias detected | No bias detected                     |
| 49                                          | Chlorpromazine:Sertindole    | NA (NA) | NA (NA) | No bias detected                     | No bias detected | No bias detected                     |
| 50                                          | Chlorpromazine:Zotepine      | NA (NA) | NA (NA) | No bias detected                     | No bias detected | No bias detected                     |
| 51                                          | Clozapine:Fluphenazine       | NA (NA) | NA (NA) | No bias detected                     | No bias detected | No bias detected                     |
| 52                                          | Clozapine:Levomepromazine    | NA (NA) | NA (NA) | No bias detected                     | No bias detected | No bias detected                     |
| 53                                          | Clozapine:Placebo            | NA (NA) | NA (NA) | No bias detected                     | No bias detected | No bias detected                     |
| 54                                          | Clozapine:Sertindole         | NA (NA) | NA (NA) | No bias detected                     | No bias detected | No bias detected                     |
| 55                                          | Clozapine:Sulpiride          | NA (NA) | NA (NA) | No bias detected                     | No bias detected | No bias detected                     |
| 56                                          | Clozapine:Thioridazine       | NA (NA) | NA (NA) | No bias detected                     | No bias detected | No bias detected                     |
| 57                                          | Clozapine:Trifluoperazine    | NA (NA) | NA (NA) | No bias detected                     | No bias detected | No bias detected                     |
| 58                                          | Fluphenazine:Levomepromazine | NA (NA) | NA (NA) | No bias detected                     | No bias detected | No bias detected                     |
| 59                                          | Fluphenazine:Olanzapine      | NA (NA) | NA (NA) | No bias detected                     | No bias detected | No bias detected                     |
| 60                                          | Fluphenazine:Placebo         | NA (NA) | NA (NA) | No bias detected                     | No bias detected | No bias detected                     |
| 61                                          | Fluphenazine:Sertindole      | NA (NA) | NA (NA) | No bias detected                     | No bias detected | No bias detected                     |
| 62                                          | Fluphenazine:Sulpiride       | NA (NA) | NA (NA) | No bias detected                     | No bias detected | No bias detected                     |
| 63                                          | Fluphenazine:Thioridazine    | NA (NA) | NA (NA) | No bias detected                     | No bias detected | No bias detected                     |

|     |                                 |         |         |                  |                  |
|-----|---------------------------------|---------|---------|------------------|------------------|
| 64  | Fluphenazine:Trifluoperazine    | NA (NA) | NA (NA) | No bias detected | No bias detected |
| 65  | Fluphenazine:Ziprasidone        | NA (NA) | NA (NA) | No bias detected | No bias detected |
| 66  | Fluphenazine:Zotepine           | NA (NA) | NA (NA) | No bias detected | No bias detected |
| 67  | Haloperidol:Sertindole          | NA (NA) | NA (NA) | No bias detected | No bias detected |
| 68  | Haloperidol:Sulpiride           | NA (NA) | NA (NA) | No bias detected | No bias detected |
| 69  | Haloperidol:Thioridazine        | NA (NA) | NA (NA) | No bias detected | No bias detected |
| 70  | Haloperidol:Trifluoperazine     | NA (NA) | NA (NA) | No bias detected | No bias detected |
| 71  | Haloperidol:Ziprasidone         | NA (NA) | NA (NA) | No bias detected | No bias detected |
| 72  | Haloperidol:Zotepine            | NA (NA) | NA (NA) | No bias detected | No bias detected |
| 73  | Levomepromazine:Olanzapine      | NA (NA) | NA (NA) | No bias detected | No bias detected |
| 74  | Levomepromazine:Placebo         | NA (NA) | NA (NA) | No bias detected | No bias detected |
| 75  | Levomepromazine:Quetiapine      | NA (NA) | NA (NA) | No bias detected | No bias detected |
| 76  | Levomepromazine:Risperidone     | NA (NA) | NA (NA) | No bias detected | No bias detected |
| 77  | Levomepromazine:Sertindole      | NA (NA) | NA (NA) | No bias detected | No bias detected |
| 78  | Levomepromazine:Sulpiride       | NA (NA) | NA (NA) | No bias detected | No bias detected |
| 79  | Levomepromazine:Thioridazine    | NA (NA) | NA (NA) | No bias detected | No bias detected |
| 80  | Levomepromazine:Trifluoperazine | NA (NA) | NA (NA) | No bias detected | No bias detected |
| 81  | Levomepromazine:Ziprasidone     | NA (NA) | NA (NA) | No bias detected | No bias detected |
| 82  | Levomepromazine:Zotepine        | NA (NA) | NA (NA) | No bias detected | No bias detected |
| 83  | Olanzapine:Placebo              | NA (NA) | NA (NA) | No bias detected | No bias detected |
| 84  | Olanzapine:Sertindole           | NA (NA) | NA (NA) | No bias detected | No bias detected |
| 85  | Olanzapine:Sulpiride            | NA (NA) | NA (NA) | No bias detected | No bias detected |
| 86  | Olanzapine:Thioridazine         | NA (NA) | NA (NA) | No bias detected | No bias detected |
| 87  | Olanzapine:Trifluoperazine      | NA (NA) | NA (NA) | No bias detected | No bias detected |
| 88  | Olanzapine:Ziprasidone          | NA (NA) | NA (NA) | No bias detected | No bias detected |
| 89  | Olanzapine:Zotepine             | NA (NA) | NA (NA) | No bias detected | No bias detected |
| 90  | Placebo:Quetiapine              | NA (NA) | NA (NA) | No bias detected | No bias detected |
| 91  | Placebo:Risperidone             | NA (NA) | NA (NA) | No bias detected | No bias detected |
| 92  | Placebo:Sertindole              | NA (NA) | NA (NA) | No bias detected | No bias detected |
| 93  | Placebo:Sulpiride               | NA (NA) | NA (NA) | No bias detected | No bias detected |
| 94  | Placebo:Ziprasidone             | NA (NA) | NA (NA) | No bias detected | No bias detected |
| 95  | Placebo:Zotepine                | NA (NA) | NA (NA) | No bias detected | No bias detected |
| 96  | Quetiapine:Sertindole           | NA (NA) | NA (NA) | No bias detected | No bias detected |
| 97  | Quetiapine:Sulpiride            | NA (NA) | NA (NA) | No bias detected | No bias detected |
| 98  | Quetiapine:Thioridazine         | NA (NA) | NA (NA) | No bias detected | No bias detected |
| 99  | Quetiapine:Trifluoperazine      | NA (NA) | NA (NA) | No bias detected | No bias detected |
| 100 | Quetiapine:Ziprasidone          | NA (NA) | NA (NA) | No bias detected | No bias detected |
| 101 | Quetiapine:Zotepine             | NA (NA) | NA (NA) | No bias detected | No bias detected |
| 102 | Risperidone:Sulpiride           | NA (NA) | NA (NA) | No bias detected | No bias detected |
| 103 | Risperidone:Thioridazine        | NA (NA) | NA (NA) | No bias detected | No bias detected |
| 104 | Risperidone:Trifluoperazine     | NA (NA) | NA (NA) | No bias detected | No bias detected |
| 105 | Risperidone:Ziprasidone         | NA (NA) | NA (NA) | No bias detected | No bias detected |
| 106 | Risperidone:Zotepine            | NA (NA) | NA (NA) | No bias detected | No bias detected |
| 107 | Sertindole:Sulpiride            | NA (NA) | NA (NA) | No bias detected | No bias detected |
| 108 | Sertindole:Thioridazine         | NA (NA) | NA (NA) | No bias detected | No bias detected |
| 109 | Sertindole:Trifluoperazine      | NA (NA) | NA (NA) | No bias detected | No bias detected |
| 110 | Sertindole:Ziprasidone          | NA (NA) | NA (NA) | No bias detected | No bias detected |
| 111 | Sertindole:Zotepine             | NA (NA) | NA (NA) | No bias detected | No bias detected |
| 112 | Sulpiride:Thioridazine          | NA (NA) | NA (NA) | No bias detected | No bias detected |
| 113 | Sulpiride:Trifluoperazine       | NA (NA) | NA (NA) | No bias detected | No bias detected |
| 114 | Sulpiride:Ziprasidone           | NA (NA) | NA (NA) | No bias detected | No bias detected |

|     |                             |         |         |                  |                  |
|-----|-----------------------------|---------|---------|------------------|------------------|
| 115 | Sulpiride:Zotepine          | NA (NA) | NA (NA) | No bias detected | No bias detected |
| 116 | Thioridazine:Ziprasidone    | NA (NA) | NA (NA) | No bias detected | No bias detected |
| 117 | Thioridazine:Zotepine       | NA (NA) | NA (NA) | No bias detected | No bias detected |
| 118 | Trifluoperazine:Ziprasidone | NA (NA) | NA (NA) | No bias detected | No bias detected |
| 119 | Trifluoperazine:Zotepine    | NA (NA) | NA (NA) | No bias detected | No bias detected |
| 120 | Ziprasidone:Zotepine        | NA (NA) | NA (NA) | No bias detected | No bias detected |

Showing 1 to 120 of 120 entries

### Evaluation of contribution from evidence with suspected bias

The possible levels for contribution are *no substantial contribution from bias*, *substantial contribution from bias balanced*, and *substantial contribution from bias favoring X*. We considered the contribution from biased evidence as substantially in favor of one treatment if the relative difference between treatments was at least 15%.

### Evaluation of small-study effects

To assess the presence of small-study effects, we compared the obtained adjusted-estimates (column 6 of the ROB-MAN table: NMR treatment effect at the smallest observed variance) with the original estimates (column 5 of the ROB-MAN table: NMA treatment effect) by looking at the overlap of their corresponding confidence intervals. A lack of overlap between the two intervals indicates that effect estimates differ between smaller and larger studies. No small-study effect was identified among all comparisons.

### Overall risk of bias

| NMA estimate             | % contribution of evidence from pairwise comparisons with suspected bias |                            | Evaluation of contribution from evidence with suspected bias<br>set all to "No substantial contribution" | Bias assessment for indirect evidence | NMA treatment effect              | NMR treatment effect at the smallest observed variance | Evaluation of small-study effects<br>set all to "No evidence" | Overall risk of bias<br>calculate overall RoB |          |
|--------------------------|--------------------------------------------------------------------------|----------------------------|----------------------------------------------------------------------------------------------------------|---------------------------------------|-----------------------------------|--------------------------------------------------------|---------------------------------------------------------------|-----------------------------------------------|----------|
|                          | Favouring first treatment                                                | Favouring second treatment |                                                                                                          |                                       |                                   |                                                        |                                                               |                                               |          |
| <b>mixed/only direct</b> |                                                                          |                            |                                                                                                          |                                       |                                   |                                                        |                                                               |                                               |          |
| 1                        | Amisulpride:Olanzapine                                                   | 0                          | 0                                                                                                        | No substantial contribution from bias | No bias detected                  | 0.23<br>(-0.42,0.86)                                   | 0.3<br>(-11.2,12.53)                                          | No evidence of small-study effects            | Low risk |
| 2                        | Chlorpromazine:Clozapine                                                 | 0                          | 1                                                                                                        | No substantial contribution from bias | No bias detected                  | -0.44<br>(-0.68,-0.19)                                 | -0.52<br>(-0.91,-0.13)                                        | No evidence of small-study effects            | Low risk |
| 3                        | Chlorpromazine:Levomepromazine                                           | 0                          | 0                                                                                                        | No substantial contribution from bias | No bias detected                  | -0.69<br>(-1.45,0.07)                                  | 2.14<br>(-20.61,18.33)                                        | No evidence of small-study effects            | Low risk |
| 4                        | Chlorpromazine:Olanzapine                                                | 0                          | 0                                                                                                        | No substantial contribution from bias | No bias detected                  | -0.38<br>(-0.64,-0.1)                                  | -0.5<br>(-0.83,-0.08)                                         | No evidence of small-study effects            | Low risk |
| 5                        | Chlorpromazine:Placebo                                                   | 0                          | 0                                                                                                        | No substantial contribution from bias | No bias detected                  | 0.52<br>(-0.18,1.22)                                   | 2.75<br>(-12.97,16.74)                                        | No evidence of small-study effects            | Low risk |
| 6                        | Chlorpromazine:Quetiapine                                                | 0                          | 0                                                                                                        | No substantial contribution from bias | No bias detected                  | -0.01<br>(-0.29,0.26)                                  | 0.06<br>(-0.32,0.44)                                          | No evidence of small-study effects            | Low risk |
| 7                        | Chlorpromazine:Sulpiride                                                 | 0                          | 0                                                                                                        | No substantial contribution from bias | No bias detected                  | -0.44<br>(-1.07,0.18)                                  | 4.84<br>(-20.02,20.36)                                        | No evidence of small-study effects            | Low risk |
| 8                        | Chlorpromazine:Thioridazine                                              | 0                          | 0                                                                                                        | No substantial contribution from bias | No bias detected                  | -0.09<br>(-0.79,0.62)                                  | -7.49<br>(-33.25,6.3)                                         | No evidence of small-study effects            | Low risk |
| 9                        | Chlorpromazine:Trifluoperazine                                           | 0                          | 0                                                                                                        | No substantial contribution from bias | No bias detected                  | -0.21<br>(-0.96,0.53)                                  | -0.56<br>(-12.07,16.99)                                       | No evidence of small-study effects            | Low risk |
| 10                       | Chlorpromazine:Ziprasidone                                               | 0                          | 0                                                                                                        | No substantial contribution from bias | No bias detected                  | -0.24<br>(-0.62,0.13)                                  | 0.14<br>(-0.63,0.97)                                          | No evidence of small-study effects            | Low risk |
| 11                       | Clozapine:Haloperidol                                                    | 1                          | 0                                                                                                        | No substantial contribution from bias | No bias detected                  | 0.32<br>(0.12,0.52)                                    | 0.3<br>(0.057)                                                | No evidence of small-study effects            | Low risk |
| 12                       | Clozapine:Olanzapine                                                     | 0                          | 0                                                                                                        | No substantial contribution from bias | No bias detected                  | 0.06<br>(-0.11,0.24)                                   | 0.02<br>(-0.23,0.28)                                          | No evidence of small-study effects            | Low risk |
| 13                       | Clozapine:Quetiapine                                                     | 6                          | 0                                                                                                        | No substantial contribution from bias | Suspected bias favoring Clozapine | 0.42<br>(0.14,0.71)                                    | 0.58<br>(0.17,0.98)                                           | No evidence of small-study effects            | Low risk |
| 14                       | Clozapine:Risperidone                                                    | 0                          | 8                                                                                                        | No substantial contribution from bias | No bias detected                  | 0.19<br>(0.038)                                        | 0.27<br>(-0.01,0.55)                                          | No evidence of small-study effects            | Low risk |
| 15                       | Clozapine:Ziprasidone                                                    | 0                          | 0                                                                                                        | No substantial contribution from bias | No bias detected                  | 0.2<br>(-0.2,0.59)                                     | 0.67<br>(-0.18,1.53)                                          | No evidence of small-study effects            | Low risk |
| 16                       | Clozapine:Zotepine                                                       | 0                          | 0                                                                                                        | No substantial contribution from bias | No bias detected                  | 0.87<br>(-0.63,0.76)                                   | 19.23<br>(2.56,38.72)                                         | No evidence of small-study effects            | Low risk |

|                 |                              |   |    |                                                          |                                      |                        |                          |                                    |               |
|-----------------|------------------------------|---|----|----------------------------------------------------------|--------------------------------------|------------------------|--------------------------|------------------------------------|---------------|
| 17              | Fluphenazine/Haloperidol     | 0 | 0  | No substantial contribution from bias                    | No bias detected                     | -0.1<br>(-0.32,0.32)   | -0.3<br>(-1.2,0.48)      | No evidence of small-study effects | Low risk      |
| 18              | Fluphenazine/Quetiapine      | 0 | 0  | No substantial contribution from bias                    | No bias detected                     | 0.01<br>(-0.48,0.49)   | -0.01<br>(-0.98,0.85)    | No evidence of small-study effects | Low risk      |
| 19              | Fluphenazine/Risperidone     | 0 | 12 | No substantial contribution from bias                    | No bias detected                     | -0.22<br>(-0.87,0.23)  | -0.32<br>(-1.3,0.53)     | No evidence of small-study effects | Low risk      |
| 20              | Haloperidol/Olanzapine       | 0 | 0  | No substantial contribution from bias                    | No bias detected                     | -0.26<br>(-0.46,-0.05) | -0.28<br>(-0.57,0.01)    | No evidence of small-study effects | Low risk      |
| 21              | Haloperidol/Quetiapine       | 0 | 0  | No substantial contribution from bias                    | No bias detected                     | 0.11<br>(-0.2,0.4)     | 0.29<br>(-0.12,0.69)     | No evidence of small-study effects | Low risk      |
| 22              | Haloperidol/Risperidone      | 0 | 33 | Substantial contribution from bias favouring Risperidone | Suspected bias favouring Risperidone | -0.13<br>(-0.36,0.1)   | -0.03<br>(-0.37,0.33)    | No evidence of small-study effects | Some concerns |
| 23              | Olanzapine/Quetiapine        | 0 | 0  | No substantial contribution from bias                    | No bias detected                     | 0.37<br>(0.06,0.65)    | 0.56<br>(0.13,0.99)      | No evidence of small-study effects | Low risk      |
| 24              | Olanzapine/Risperidone       | 0 | 8  | No substantial contribution from bias                    | No bias detected                     | 0.13<br>(-0.08,0.33)   | 0.25<br>(-0.05,0.56)     | No evidence of small-study effects | Low risk      |
| 25              | Placebo/Thioridazine         | 0 | 0  | No substantial contribution from bias                    | No bias detected                     | -0.61<br>(-1.35,0.15)  | -10.53<br>(-35.13,13)    | No evidence of small-study effects | Low risk      |
| 26              | Placebo/Trifluoperazine      | 0 | 0  | No substantial contribution from bias                    | No bias detected                     | -0.73<br>(-1.51,0.07)  | -1.89<br>(-19.76,14.98)  | No evidence of small-study effects | Low risk      |
| 27              | Quetiapine/Risperidone       | 0 | 9  | No substantial contribution from bias                    | No bias detected                     | -0.23<br>(-0.54,0.09)  | -0.31<br>(-0.77,0.16)    | No evidence of small-study effects | Low risk      |
| 28              | Risperidone/Serindole        | 0 | 0  | No substantial contribution from bias                    | No bias detected                     | 0.32<br>(-0.18,0.82)   | -0.11<br>(-13.58,16.37)  | No evidence of small-study effects | Low risk      |
| 29              | Thioridazine/Trifluoperazine | 0 | 0  | No substantial contribution from bias                    | No bias detected                     | -0.12<br>(-0.89,0.65)  | 9.3<br>(-10.26,43.24)    | No evidence of small-study effects | Low risk      |
| <b>Indirect</b> |                              |   |    |                                                          |                                      |                        |                          |                                    |               |
| 30              | Chlorpromazine/Haloperidol   | 0 | 0  | No substantial contribution from bias                    | No bias detected                     | -0.12<br>(-0.4,0.18)   | -0.22<br>(-0.66,0.19)    | No evidence of small-study effects | Low risk      |
| 31              | Chlorpromazine/Risperidone   | 0 | 5  | No substantial contribution from bias                    | No bias detected                     | -0.25<br>(-0.54,0.05)  | -0.25<br>(-0.72,0.21)    | No evidence of small-study effects | Low risk      |
| 32              | Haloperidol/Levomopromazine  | 0 | 0  | No substantial contribution from bias                    | No bias detected                     | -0.57<br>(-1.39,0.25)  | 2.34<br>(-30.34,18.53)   | No evidence of small-study effects | Low risk      |
| 33              | Haloperidol/Placebo          | 0 | 0  | No substantial contribution from bias                    | Suspected bias favouring Haloperidol | 0.64<br>(-0.14,1.4)    | 3.04<br>(-12.76,16.94)   | No evidence of small-study effects | Low risk      |
| 34              | Amisulpride/Chlorpromazine   | 0 | 0  | No substantial contribution from bias                    | No bias detected                     | 0.61<br>(-0.11,1.3)    | 0.8<br>(-10.78,13.15)    | No evidence of small-study effects | Low risk      |
| 35              | Amisulpride/Clozapine        | 0 | 0  | No substantial contribution from bias                    | No bias detected                     | 0.17<br>(-0.51,0.83)   | 0.28<br>(-11.21,12.52)   | No evidence of small-study effects | Low risk      |
| 36              | Amisulpride/Fluphenazine     | 0 | 0  | No substantial contribution from bias                    | No bias detected                     | 0.59<br>(-0.22,1.36)   | 0.87<br>(-10.6,13.16)    | No evidence of small-study effects | Low risk      |
| 37              | Amisulpride/Haloperidol      | 0 | 0  | No substantial contribution from bias                    | No bias detected                     | 0.49<br>(-0.2,1.16)    | 0.59<br>(-10.93,12.81)   | No evidence of small-study effects | Low risk      |
| 38              | Amisulpride/Levomopromazine  | 0 | 0  | No substantial contribution from bias                    | No bias detected                     | -0.09<br>(-1.12,0.97)  | 0.12<br>(-17.17,20.63)   | No evidence of small-study effects | Low risk      |
| 39              | Amisulpride/Placebo          | 0 | 0  | No substantial contribution from bias                    | No bias detected                     | 1.13<br>(0.13,2.13)    | 2.17<br>(-7.17,21.78)    | No evidence of small-study effects | Low risk      |
| 40              | Amisulpride/Quetiapine       | 0 | 0  | No substantial contribution from bias                    | No bias detected                     | 0.6<br>(-0.13,1.3)     | 0.86<br>(-10.66,13.21)   | No evidence of small-study effects | Low risk      |
| 41              | Amisulpride/Risperidone      | 0 | 6  | No substantial contribution from bias                    | No bias detected                     | 0.36<br>(-0.33,1.04)   | 0.53<br>(-10.96,12.78)   | No evidence of small-study effects | Low risk      |
| 42              | Amisulpride/Serindole        | 0 | 0  | No substantial contribution from bias                    | No bias detected                     | 0.68<br>(-0.18,1.52)   | -1.92<br>(-16.62,29.98)  | No evidence of small-study effects | Low risk      |
| 43              | Amisulpride/Sulpiride        | 0 | 0  | No substantial contribution from bias                    | No bias detected                     | 0.17<br>(-0.81,1.08)   | 0.34<br>(-27.19,22.88)   | No evidence of small-study effects | Low risk      |
| 44              | Amisulpride/Thioridazine     | 0 | 0  | No substantial contribution from bias                    | No bias detected                     | 0.52<br>(-0.48,1.49)   | -10.29<br>(-32.01,14.26) | No evidence of small-study effects | Low risk      |
| 45              | Amisulpride/Trifluoperazine  | 0 | 0  | No substantial contribution from bias                    | No bias detected                     | 0.4<br>(-0.63,1.41)    | -1.69<br>(-17.79,28.55)  | No evidence of small-study effects | Low risk      |
| 46              | Amisulpride/Ziprasidone      | 0 | 0  | No substantial contribution from bias                    | No bias detected                     | 0.37<br>(-0.42,1.14)   | 0.92<br>(-10.64,13.24)   | No evidence of small-study effects | Low risk      |
| 47              | Amisulpride/Zotepine         | 0 | 0  | No substantial contribution from bias                    | No bias detected                     | 0.24<br>(-0.74,1.18)   | 16.09<br>(-6.22,50.2)    | No evidence of small-study effects | Low risk      |
| 48              | Chlorpromazine/Fluphenazine  | 0 | 0  | No substantial contribution from bias                    | No bias detected                     | -0.02<br>(-0.51,0.47)  | 0.07<br>(-0.8,1.06)      | No evidence of small-study effects | Low risk      |
| 49              | Chlorpromazine/Serindole     | 0 | 0  | No substantial contribution from bias                    | No bias detected                     | 0.07<br>(-0.5,0.66)    | -0.33<br>(-13.85,16.16)  | No evidence of small-study effects | Low risk      |
| 50              | Chlorpromazine/Zotepine      | 0 | 0  | No substantial contribution from bias                    | No bias detected                     | -0.37<br>(-1.1,0.37)   | 18.7<br>(2.02,38.31)     | No evidence of small-study effects | Low risk      |
| 51              | Clozapine/Fluphenazine       | 1 | 0  | No substantial contribution from bias                    | No bias detected                     | 0.41<br>(-0.03,0.86)   | 0.59<br>(-0.24,1.55)     | No evidence of small-study effects | Low risk      |
| 52              | Clozapine/Levomopromazine    | 1 | 0  | No substantial contribution from bias                    | No bias detected                     | -0.25<br>(-1.04,0.54)  | 2.59<br>(-30.05,18.85)   | No evidence of small-study effects | Low risk      |
| 53              | Clozapine/Placebo            | 1 | 0  | No substantial contribution from bias                    | No bias detected                     | 0.96<br>(0.2,1.7)      | 3.32<br>(-12.44,17.2)    | No evidence of small-study effects | Low risk      |
| 54              | Clozapine/Serindole          | 0 | 0  | No substantial contribution from bias                    | No bias detected                     | 0.51<br>(-0.02,1.05)   | 0.3<br>(-13.31,16.66)    | No evidence of small-study effects | Low risk      |
| 55              | Clozapine/Sulpiride          | 1 | 0  | No substantial contribution from bias                    | No bias detected                     | 0<br>(-0.68,0.66)      | 5.35<br>(-19.55,20.88)   | No evidence of small-study effects | Low risk      |
| 56              | Clozapine/Thioridazine       | 1 | 0  | No substantial contribution from bias                    | No bias detected                     | 0.33<br>(-0.4,1.09)    | -6.96<br>(-32.74,6.98)   | No evidence of small-study effects | Low risk      |
| 57              | Clozapine/Trifluoperazine    | 1 | 0  | No substantial contribution from bias                    | No bias detected                     | 0.23<br>(-0.56,1)      | -0.04<br>(-11.59,11.5)   | No evidence of small-study effects | Low risk      |
| 58              | Fluphenazine/Levomopromazine | 0 | 0  | No substantial contribution from bias                    | No bias detected                     | -0.66<br>(-1.58,0.24)  | 2.11<br>(-30.78,18.3)    | No evidence of small-study effects | Low risk      |
| 59              | Fluphenazine/Olanzapine      | 0 | 0  | No substantial contribution from bias                    | No bias detected                     | -0.36<br>(-0.8,0.1)    | -0.58<br>(-1.52,0.23)    | No evidence of small-study effects | Low risk      |
| 60              | Fluphenazine/Placebo         | 0 | 0  | No substantial contribution from bias                    | No bias detected                     | 0.54<br>(-0.32,1.39)   | 2.8<br>(-13.06,16.64)    | No evidence of small-study effects | Low risk      |
| 61              | Fluphenazine/Serindole       | 0 | 0  | No substantial contribution from bias                    | No bias detected                     | 0.09<br>(-0.57,0.78)   | -0.93<br>(-14.02,16.02)  | No evidence of small-study effects | Low risk      |
| 62              | Fluphenazine/Sulpiride       | 0 | 0  | No substantial contribution from bias                    | No bias detected                     | -0.42<br>(-1.22,0.36)  | 4.73<br>(-20.04,20.11)   | No evidence of small-study effects | Low risk      |
| 63              | Fluphenazine/Thioridazine    | 0 | 0  | No substantial contribution from bias                    | No bias detected                     | -0.07<br>(-0.92,0.81)  | -7.68<br>(-33.21,6.42)   | No evidence of small-study effects | Low risk      |
| 64              | Fluphenazine/Trifluoperazine | 0 | 0  | No substantial contribution from bias                    | No bias detected                     | -0.17<br>(-1.09,0.69)  | -0.71<br>(-12.18,16.87)  | No evidence of small-study effects | Low risk      |
| 65              | Fluphenazine/Ziprasidone     | 0 | 0  | No substantial contribution from bias                    | No bias detected                     | -0.21<br>(-0.81,0.37)  | 0.07<br>(-1.13,1.2)      | No evidence of small-study effects | Low risk      |
| 66              | Fluphenazine/Zotepine        | 0 | 0  | No substantial contribution from bias                    | No bias detected                     | -0.35<br>(-1.16,0.47)  | 18.7<br>(1.93,38.13)     | No evidence of small-study effects | Low risk      |
| 67              | Haloperidol/Serindole        | 0 | 0  | No substantial contribution from bias                    | No bias detected                     | 0.19<br>(-0.35,0.74)   | -0.11<br>(-13.58,16.37)  | No evidence of small-study effects | Low risk      |
| 68              | Haloperidol/Sulpiride        | 0 | 0  | No substantial contribution from bias                    | No bias detected                     | -0.32<br>(-1.02,0.36)  | 5.07<br>(-19.88,20.55)   | No evidence of small-study effects | Low risk      |
| 69              | Haloperidol/Thioridazine     | 0 | 0  | No substantial contribution from bias                    | No bias detected                     | 0.03<br>(-0.74,0.79)   | -7.27<br>(-33.01,6.69)   | No evidence of small-study effects | Low risk      |
| 70              | Haloperidol/Trifluoperazine  | 0 | 0  | No substantial contribution from bias                    | No bias detected                     | -0.08<br>(-0.89,0.7)   | -0.33<br>(-11.87,11.17)  | No evidence of small-study effects | Low risk      |
| 71              | Haloperidol/Ziprasidone      | 0 | 0  | No substantial contribution from bias                    | No bias detected                     | -0.11<br>(-0.56,0.3)   | 0.37<br>(-0.47,1.29)     | No evidence of small-study effects | Low risk      |
| 72              | Haloperidol/Zotepine         | 0 | 0  | No substantial contribution from bias                    | No bias detected                     | -0.25<br>(-0.97,0.48)  | 18.9<br>(2.27,38.42)     | No evidence of small-study effects | Low risk      |



|     |                                 |   |   |                                       |                  |                        |                          |                                    |          |
|-----|---------------------------------|---|---|---------------------------------------|------------------|------------------------|--------------------------|------------------------------------|----------|
| 73  | Levomepromazine:Clanzapine      | 0 | 0 | No substantial contribution from bias | No bias detected | 0.31<br>(-5.1,1.2)     | -2.63<br>(-18.83,30.07)  | No evidence of small-study effects | Low risk |
| 74  | Levomepromazine:Placebo         | 0 | 0 | No substantial contribution from bias | No bias detected | 1.21<br>(0.18,2.24)    | 3.11<br>(-29.49,38.91)   | No evidence of small-study effects | Low risk |
| 75  | Levomepromazine:Quetiapine      | 0 | 0 | No substantial contribution from bias | No bias detected | 0.6<br>(-0.14,1.49)    | -2.02<br>(-18.23,30.62)  | No evidence of small-study effects | Low risk |
| 76  | Levomepromazine:Risperidone     | 0 | 4 | No substantial contribution from bias | No bias detected | 0.44<br>(-0.38,1.26)   | -2.33<br>(-18.52,30.33)  | No evidence of small-study effects | Low risk |
| 77  | Levomepromazine:Sertraline      | 0 | 0 | No substantial contribution from bias | No bias detected | 0.75<br>(-0.19,1.71)   | -1.48<br>(-27.81,47.5)   | No evidence of small-study effects | Low risk |
| 78  | Levomepromazine:Sulpiride       | 0 | 0 | No substantial contribution from bias | No bias detected | 0.26<br>(-0.75,1.22)   | 2.49<br>(-28.06,35.97)   | No evidence of small-study effects | Low risk |
| 79  | Levomepromazine:Thioridazine    | 0 | 0 | No substantial contribution from bias | No bias detected | 0.6<br>(-0.43,1.63)    | -11.66<br>(-44.06,31.09) | No evidence of small-study effects | Low risk |
| 80  | Levomepromazine:Trifluoperazine | 0 | 0 | No substantial contribution from bias | No bias detected | 0.49<br>(-0.61,1.54)   | -2.32<br>(-29.18,46.82)  | No evidence of small-study effects | Low risk |
| 81  | Levomepromazine:Ziprasidone     | 0 | 0 | No substantial contribution from bias | No bias detected | 0.45<br>(-0.4,1.29)    | -1.82<br>(-18.2,30.58)   | No evidence of small-study effects | Low risk |
| 82  | Levomepromazine:Zotepine        | 0 | 0 | No substantial contribution from bias | No bias detected | 0.32<br>(-0.74,1.36)   | 15.02<br>(-0.76,68.05)   | No evidence of small-study effects | Low risk |
| 83  | Clanzapine:Placebo              | 0 | 0 | No substantial contribution from bias | No bias detected | 0.9<br>(0.13,1.65)     | 3.3<br>(-12.47,17.17)    | No evidence of small-study effects | Low risk |
| 84  | Clanzapine:Sertraline           | 0 | 0 | No substantial contribution from bias | No bias detected | 0.45<br>(-0.1,0.98)    | 0.27<br>(-13.31,16.64)   | No evidence of small-study effects | Low risk |
| 85  | Clanzapine:Sulpiride            | 0 | 0 | No substantial contribution from bias | No bias detected | -0.06<br>(-0.76,0.6)   | 5.34<br>(-19.58,20.82)   | No evidence of small-study effects | Low risk |
| 86  | Clanzapine:Thioridazine         | 0 | 0 | No substantial contribution from bias | No bias detected | 0.29<br>(-0.47,1.04)   | -7<br>(-32.74,6.96)      | No evidence of small-study effects | Low risk |
| 87  | Clanzapine:Trifluoperazine      | 0 | 0 | No substantial contribution from bias | No bias detected | 0.17<br>(-0.63,0.95)   | -0.06<br>(-11.61,17.46)  | No evidence of small-study effects | Low risk |
| 88  | Clanzapine:Ziprasidone          | 0 | 0 | No substantial contribution from bias | No bias detected | 0.14<br>(-0.29,0.55)   | 0.65<br>(-0.21,1.52)     | No evidence of small-study effects | Low risk |
| 89  | Clanzapine:Zotepine             | 0 | 0 | No substantial contribution from bias | No bias detected | 0.01<br>(-0.71,0.71)   | 19.2<br>(2.55,38.66)     | No evidence of small-study effects | Low risk |
| 90  | Placebo:Quetiapine              | 0 | 0 | No substantial contribution from bias | No bias detected | -0.54<br>(-1.29,0.22)  | -2.66<br>(-16.66,13.01)  | No evidence of small-study effects | Low risk |
| 91  | Placebo:Risperidone             | 0 | 3 | No substantial contribution from bias | No bias detected | -0.77<br>(-1.53,0.01)  | -3.07<br>(-16.93,12.68)  | No evidence of small-study effects | Low risk |
| 92  | Placebo:Sertraline              | 0 | 0 | No substantial contribution from bias | No bias detected | -0.45<br>(-1.35,0.48)  | -3.11<br>(-11.77,9.66)   | No evidence of small-study effects | Low risk |
| 93  | Placebo:Sulpiride               | 0 | 0 | No substantial contribution from bias | No bias detected | -0.96<br>(-1.89,-0.02) | 3.06<br>(-33.35,28.42)   | No evidence of small-study effects | Low risk |
| 94  | Placebo:Ziprasidone             | 0 | 0 | No substantial contribution from bias | No bias detected | -0.75<br>(-1.56,0.03)  | -2.47<br>(-16.99,13.15)  | No evidence of small-study effects | Low risk |
| 95  | Placebo:Zotepine                | 0 | 0 | No substantial contribution from bias | No bias detected | -0.88<br>(-1.91,0.13)  | 16.29<br>(4.89,42.48)    | No evidence of small-study effects | Low risk |
| 96  | Quetiapine:Sertraline           | 0 | 0 | No substantial contribution from bias | No bias detected | 0.08<br>(-0.5,0.68)    | -0.44<br>(-13.91,16.13)  | No evidence of small-study effects | Low risk |
| 97  | Quetiapine:Sulpiride            | 0 | 0 | No substantial contribution from bias | No bias detected | -0.42<br>(-1.12,0.24)  | 4.79<br>(-20.11,20.23)   | No evidence of small-study effects | Low risk |
| 98  | Quetiapine:Thioridazine         | 0 | 0 | No substantial contribution from bias | No bias detected | -0.07<br>(-0.82,0.68)  | -7.55<br>(-33.35,6.44)   | No evidence of small-study effects | Low risk |
| 99  | Quetiapine:Trifluoperazine      | 0 | 0 | No substantial contribution from bias | No bias detected | -0.19<br>(-0.99,0.59)  | -0.64<br>(-12.15,16.91)  | No evidence of small-study effects | Low risk |
| 100 | Quetiapine:Ziprasidone          | 0 | 0 | No substantial contribution from bias | No bias detected | -0.22<br>(-0.67,0.22)  | 0.08<br>(-0.75,0.93)     | No evidence of small-study effects | Low risk |
| 101 | Quetiapine:Zotepine             | 0 | 0 | No substantial contribution from bias | No bias detected | -0.36<br>(-1.11,0.4)   | 18.63<br>(1.96,38.21)    | No evidence of small-study effects | Low risk |
| 102 | Risperidone:Sulpiride           | 4 | 0 | No substantial contribution from bias | No bias detected | -0.19<br>(-0.88,0.48)  | 5.12<br>(-19.85,20.55)   | No evidence of small-study effects | Low risk |
| 103 | Risperidone:Thioridazine        | 3 | 0 | No substantial contribution from bias | No bias detected | 0.16<br>(-0.61,0.93)   | -7.26<br>(-33.02,6.66)   | No evidence of small-study effects | Low risk |
| 104 | Risperidone:Trifluoperazine     | 3 | 0 | No substantial contribution from bias | No bias detected | 0.04<br>(-0.76,0.83)   | -0.33<br>(-11.85,17.24)  | No evidence of small-study effects | Low risk |
| 105 | Risperidone:Ziprasidone         | 4 | 0 | No substantial contribution from bias | No bias detected | 0.01<br>(-0.42,0.44)   | 0.4<br>(-0.47,1.28)      | No evidence of small-study effects | Low risk |
| 106 | Risperidone:Zotepine            | 5 | 0 | No substantial contribution from bias | No bias detected | -0.12<br>(-0.84,0.6)   | 18.84<br>(2.28,38.44)    | No evidence of small-study effects | Low risk |
| 107 | Sertraline:Sulpiride            | 0 | 0 | No substantial contribution from bias | No bias detected | -0.51<br>(-1.37,0.34)  | 2.42<br>(-27.3,28.68)    | No evidence of small-study effects | Low risk |
| 108 | Sertraline:Thioridazine         | 0 | 0 | No substantial contribution from bias | No bias detected | -0.16<br>(-1.07,0.74)  | -10.47<br>(-27.35,6.25)  | No evidence of small-study effects | Low risk |
| 109 | Sertraline:Trifluoperazine      | 0 | 0 | No substantial contribution from bias | No bias detected | -0.27<br>(-1.23,0.65)  | -2.42<br>(-17.33,20.82)  | No evidence of small-study effects | Low risk |
| 110 | Sertraline:Ziprasidone          | 0 | 0 | No substantial contribution from bias | No bias detected | -0.31<br>(-0.97,0.34)  | 0.44<br>(-16.1,14.03)    | No evidence of small-study effects | Low risk |
| 111 | Sertraline:Zotepine             | 0 | 0 | No substantial contribution from bias | No bias detected | -0.44<br>(-1.31,0.44)  | 16.69<br>(0.81,44.14)    | No evidence of small-study effects | Low risk |
| 112 | Sulpiride:Thioridazine          | 0 | 0 | No substantial contribution from bias | No bias detected | 0.25<br>(-0.59,1.28)   | -4.08<br>(-51.87,16.98)  | No evidence of small-study effects | Low risk |
| 113 | Sulpiride:Trifluoperazine       | 0 | 0 | No substantial contribution from bias | No bias detected | 0.23<br>(-0.73,1.21)   | -3.22<br>(-27.25,21.37)  | No evidence of small-study effects | Low risk |
| 114 | Sulpiride:Ziprasidone           | 0 | 0 | No substantial contribution from bias | No bias detected | 0.2<br>(-0.52,0.95)    | -4.77<br>(-20.06,20.08)  | No evidence of small-study effects | Low risk |
| 115 | Sulpiride:Zotepine              | 0 | 0 | No substantial contribution from bias | No bias detected | 0.07<br>(-0.88,1.03)   | 17.35<br>(4.05,38.2)     | No evidence of small-study effects | Low risk |
| 116 | Thioridazine:Ziprasidone        | 0 | 0 | No substantial contribution from bias | No bias detected | -0.15<br>(-0.95,0.65)  | 7.59<br>(-4.32,33.5)     | No evidence of small-study effects | Low risk |
| 117 | Thioridazine:Zotepine           | 0 | 0 | No substantial contribution from bias | No bias detected | -0.28<br>(-1.29,0.73)  | 23.99<br>(0.77,69.11)    | No evidence of small-study effects | Low risk |
| 118 | Trifluoperazine:Ziprasidone     | 0 | 0 | No substantial contribution from bias | No bias detected | -0.03<br>(-0.84,0.81)  | 0.7<br>(-16.84,12.34)    | No evidence of small-study effects | Low risk |
| 119 | Trifluoperazine:Zotepine        | 0 | 0 | No substantial contribution from bias | No bias detected | -0.16<br>(-1.2,0.88)   | 19.45<br>(-6.43,7.7)     | No evidence of small-study effects | Low risk |
| 120 | Ziprasidone:Zotepine            | 0 | 0 | No substantial contribution from bias | No bias detected | -0.13<br>(-0.92,0.66)  | 18.43<br>(1.83,38.15)    | No evidence of small-study effects | Low risk |

Showing 1 to 120 of 120 entries

## 17 References

- 1 Lefebvre C, Glanville J, Briscoe S, et al. Searching for and selecting studies, 2019.
- 2 Shokrane F, Adams CE. Study-based registers reduce waste in systematic reviewing: discussion and case report. *Syst Rev* 2019; **8**: 129. <https://doi.org/10.1186/s13643-019-1035-3>.
- 3 Shokrane F, Adams CE. Study-based registers of randomized controlled trials: Starting a systematic review with data extraction or meta-analysis. *Bioimpacts* 2017; **7**: 209–17. <https://doi.org/10.15171/bi.2017.25>.
- 4 Shokrane F, Adams CE. Cochrane Schizophrenia Group's Study-Based Register of Randomized Controlled Trials: Development and Content Analysis. *Schizophr Bull Open* 2020; **1**: sgaa061. <https://doi.org/10.1093/schizbullopen/sgaa061>.
- 5 Shokrane F, Adams CE. Classification of all pharmacological interventions tested in trials relevant to people with schizophrenia: A study-based analysis. *Health Info Libr J* 2021. <https://doi.org/10.1111/hir.12366>.
- 6 Schlosberg A, Shadmi M. A comparative controlled study of two long-acting phenothiazines. pipotiazine palmitate and fluphenazine decanoate. *Current Therapeutic Research, Clinical and Experimental* 1978; **23**: 642–54.
- 7 Teja JS, Grey WH, Clums JM, Warren C. Tranquilizers or anti-depressants for chronic schizophrenics: a long term study. *Aust N Z J Psychiatry* 1975; **9**: 241–47.
- 8 Bozzatello P, Bellino S, Mancini I, Sandei L, Zanalda E, Rocca P. Effects on Satisfaction and Service Engagement of Paliperidone Palmitate Compared with Oral Paliperidone in Patients with Schizophrenia. An Open Label Randomized Controlled Trial. *Clinical drug investigation* 2019; **39**: 169–78.
- 9 Ahlfors UG, Dencker SJ, Gravem A, Remvig J. Clopenthixol decanoate and perphenazine enanthate in schizophrenic patients. A double-blind Nordic multicentre trial. *Acta Psychiatrica Scandinavica Supplementum* 1980; **279**: 77–91.
- 10 Altamura AC, Velona I, Curreli R, Mundo E, Bravi D. Is olanzapine better than haloperidol in resistant schizophrenia? A double-blind study in partial responders. *International Journal of Psychiatry in Clinical Practice* 2002; **6**: 107–11.
- 11 Alvarez E, Ciudad A, Olivares JM, Bousono M, Gomez JC. A randomized, 1-year follow-up study of olanzapine and risperidone in the treatment of negative symptoms in outpatients with schizophrenia. *Journal of Clinical Psychopharmacology* 2006; **26**: 238–49.
- 12 AstraZeneca. A multicenter, double-blind, randomized, comparison of quetiapine (seroquel) and chlorpromazine in the treatment of subjects with treatment-resistant schizophrenia. <http://www.Clinicalstudyresults.org/2005>.
- 13 AstraZeneca. A multicenter, double-blind, randomized, comparison of quetiapine (seroquel) and chlorpromazine in the treatment of subjects with treatment-resistant schizophrenia. <http://www.Clinicalstudyresults.org/2005>.
- 14 Azorin JM, Spiegel R, Remington G, et al. A double-blind comparative study of clozapine and risperidone in the management of severe chronic schizophrenia. *The American Journal of Psychiatry* 2001; **158**: 1305–13.
- 15 Bitter I, Dossenbach MRK, Brook S, et al. Olanzapine versus clozapine in treatment-resistant or treatment-intolerant schizophrenia. *Progress in Neuro-Psychopharmacology and Biological Psychiatry* 2004; **28**: 173–80.
- 16 Bondolfi G, Dufour H, Patris M, et al. Risperidone versus clozapine in treatment-resistant chronic schizophrenia. a randomized double-blind study. *American Journal of Psychiatry* 1998; **155**: 499–504.

- 17 Breier AF, Malhotra AK, Su TP, et al. Clozapine and risperidone in chronic schizophrenia. effects on symptoms, parkinsonian side effects, and neuroendocrine response. *American Journal of Psychiatry* 1999; **156**: 294–98.
- 18 Breier A, Hamilton SH, David S. Comparative efficacy of olanzapine and haloperidol for patients with treatment resistant schizophrenia. *Schizophrenia Research* 1999; **36**: 271.
- 19 Browne FW, Cooper SJ, Wilson R, King DJ. Serum haloperidol levels and clinical response in chronic, treatment resistant schizophrenic patients. *Journal of Psychopharmacology* 1988; **2**: 94–103.
- 20 Buchanan RW, Breier A, Kirkpatrick B, Ball P, Carpenter, W. T., Jr. Positive and negative symptom response to clozapine in schizophrenic patients with and without the deficit syndrome. *American Journal of Psychiatry* 1998; **155**: 751–60.
- 21 Buchanan RW, Ball MP, Weiner E, et al. Olanzapine treatment of residual positive and negative symptoms. *American Journal of Psychiatry* 2005; **162**: 124–29.
- 22 Chen JJ, Chan HY, Chen CH, Gau SSF, Hwu HG. Risperidone and olanzapine versus another first generation antipsychotic in patients with schizophrenia inadequately responsive to first generation antipsychotics. *Pharmacopsychiatry* 2012; **45**: 64–71.
- 23 Chowdhury AN, Mukherjee A, Ghosh K, Chowdhury S, Das SK. Horizon of a new hope. recovery of schizophrenia in India. *International Medical Journal* 1999; **6**: 181–85.
- 24 Claus A, Bollen J, De CH, et al. Risperidone versus haloperidol in the treatment of chronic schizophrenic inpatients. a multicentre double-blind comparative study. *Acta Psychiatrica Scandinavica* 1992; **85**: 295–305.
- 25 Conley RR, Tamminga CA, Bartko JJ, et al. Olanzapine compared with chlorpromazine in treatment-resistant schizophrenia. *American Journal of Psychiatry* 1998; **155**: 914–20.
- 26 Conley RR, Kelly DL, Richardson CM, Tamminga CA, Carpenter, W. T., Jr. The efficacy of high-dose olanzapine versus clozapine in treatment-resistant schizophrenia. a double-blind, crossover study. *Journal of Clinical Psychopharmacology* 2003; **23**: 668–71.
- 27 Conley RR, Kelly DL, Nelson MW, et al. Risperidone, quetiapine, and fluphenazine in the treatment of patients with therapy-refractory schizophrenia. *Clinical Neuropharmacology* 2005; **28**: 163–68.
- 28 Daniel DG, Goldberg TE, Weinberger DR, et al. Different side effect profiles of risperidone and clozapine in 20 outpatients with schizophrenia or schizoaffective disorder. a pilot study. *American Journal of Psychiatry* 1996; **153**: 417–19.
- 29 Dean EF, Buker S. Schizophrenia treated with and without chlorpromazine. *Rocky Mountain Medical Journal* 1958; **55**: 47–50.
- 30 Emsley RA, Raniwalla J, Bailey PJ, Jones-Am. A comparison of the effects of quetiapine ('seroquel') and haloperidol in schizophrenic patients with a history of and a demonstrated, partial response to conventional antipsychotic treatment. *International Clinical Psychopharmacology* 2000; **15**: 121–31.
- 31 Hall WB, Vestre ND, Schiele BC, Zimmermann R. A controlled comparison of haloperidol and fluphenazine in chronic treatment-resistant schizophrenics. *Diseases of the Nervous System* 1968; **29**: 405–08.
- 32 Hong CJ, Chen JY, Chiu HJ, Sim CB. A double-blind comparative study of clozapine versus chlorpromazine on Chinese patients with treatment-refractory schizophrenia. *International Clinical Psychopharmacology* 1997; **12**: 123–30.
- 33 Honigfeld G, Patin J, Singer J. Clozapine. antipsychotic activity in treatment-resistant schizophrenics. *Advances in Therapy* 1984; **1**: 77–97.
- 34 Howard JS. Haloperidol for chronically hospitalized psychotics. a double blind comparison with thiothixene and placebo: a follow up open evaluation. *Diseases of the Nervous System* 1974; **35**: 458–63.

- 35 Kahn RS, van Winter RI, Leucht S, et al. Amisulpride and olanzapine followed by open-label treatment with clozapine in first-episode schizophrenia and schizophreniform disorder (OPTiMiSE). a three-phase switching study. *Lancet Psychiatry* 2018; **5**: 797–807.
- 36 Kane JM, Honigfeld G, Singer J, Meltzer H. Clozapine in treatment-resistant schizophrenics. *Psychopharmacology Bulletin* 1988; **24**: 62–67.
- 37 Kane JM, Marder SR, Schooler NR, et al. Clozapine and haloperidol in moderately refractory schizophrenia. a 6-month randomized double-blind comparison. *Archives of General Psychiatry* 2001; **58**: 965–72.
- 38 Kane JM, Khanna S, Rajadhyaksha S, Giller E. Efficacy and tolerability of ziprasidone in patients with treatment-resistant schizophrenia. *International Clinical Psychopharmacology* 2006; **21**: 21–28.
- 39 Kane JM, Meltzer HY, Carson, W. H., Jr., McQuade RD, Marcus RN, Sanchez R. Aripiprazole for treatment-resistant schizophrenia. results of a multicenter, randomized, double-blind, comparison study versus perphenazine. *Journal of Clinical Psychiatry* 2007; **68**: 213–23.
- 40 Kane JM, Potkin SG, Daniel DG, Buckley PF. A double-blind, randomized study comparing the efficacy and safety of sertindole and risperidone in patients with treatment-resistant schizophrenia. *Journal of Clinical Psychiatry* 2011; **72**: 194–204.
- 41 Kane JM, Kinon B, Johns C. Alternative strategies for treating neuroleptic non responsive patients. *Schizophrenia Research* 1993; **9**: 240.
- 42 Kinon BJ, Chen L, Ascher-Svanum H, et al. Early response to antipsychotic drug therapy as a clinical marker of subsequent response in the treatment of schizophrenia. *Neuropsychopharmacology* 2010; **35**: 581–90.
- 43 Kumra S, Frazier JA, Jacobsen LK, et al. Childhood-onset schizophrenia. A double-blind clozapine-haloperidol comparison. *Archives of General Psychiatry* 1996; **53**: 1090–97.
- 44 Kumra S, Kranzler H, Gerbino-Rosen G, et al. Clozapine and "high-dose" olanzapine in refractory early-onset schizophrenia. a 12-week randomized and double-blind comparison. *Biological Psychiatry* 2008; **63**: 524–29.
- 45 Lal S, Thavundayil JX, Nair NPV, et al. Levomepromazine versus chlorpromazine in treatment-resistant schizophrenia. a double-blind randomized trial. *Journal of Psychiatry and Neuroscience* 2006; **31**: 271–79.
- 46 Marjerrison G, Irvine D, Stewart CN, Williams R, Matheu H, Demay M. Withdrawal of long term phenothiazines from chronically hospitalized psychiatric patients. *Canadian Psychiatric Association Journal* 1964; **60**: 290–98.
- 47 McCreadie RG, MacDonald IM. High dosage haloperidol in chronic schizophrenia. *British Journal of Psychiatry* 1977; **131**: 310–16.
- 48 McEvoy JP, Lieberman JA, Stroup TS, et al. Effectiveness of clozapine versus olanzapine, quetiapine, and risperidone in patients with chronic schizophrenia who did not respond to prior atypical antipsychotic treatment. *American Journal of Psychiatry* 2006; **163**: 600–10.
- 49 Meltzer HY, Bobo WV, Roy A, et al. A randomized, double-blind comparison of clozapine and high-dose olanzapine in treatment-resistant patients with schizophrenia. *Journal of Clinical Psychiatry* 2008; **69**: 274–85.
- 50 Mercer G, Finlayson A, Johnstone EC, Murray C, Owens DGC. A study of enhanced management in patients with treatment-resistant schizophrenia. *Journal of Psychopharmacology* 1997; **11**: 349–56.
- 51 Meyer-Lindenberg A, Gruppe, H., Bauer U, Lis S, Krieger S, Gallhofer B. Improvement of cognitive function in schizophrenic patients receiving clozapine or zotepine. results from a double-blind study. *Pharmacopsychiatry* 1997; **30**: 35–42.

- 52 Moresco RM, Cavallaro R, Messa C, et al. Cerebral D2 and 5-HT2 receptor occupancy in schizophrenic patients treated with olanzapine or clozapine. *Journal of Psychopharmacology* 2004; **18**: 355–65.
- 53 Naber D, Riedel M, Klimke A, et al. Randomized double blind comparison of olanzapine vs clozapine on subjective well-being and clinical outcome in patients with schizophrenia. *Acta Psychiatrica Scandinavica* 2005; **111**: 106–15.
- 54 Rosenheck R, Cramer J, Xu W, et al. A comparison of clozapine and haloperidol in hospitalized patients with refractory schizophrenia. *New England Journal of Medicine* 1997; **337**: 809–15.
- 55 Sacchetti E, Galluzzo A, Valsecchi P, Romeo F, Gorini B, Warrington L. Ziprasidone vs clozapine in schizophrenia patients refractory to multiple antipsychotic treatments. the MOZART study. *Schizophrenia Research* 2009; **113**: 112–21.
- 56 Schiele BC, Vestre ND, Stein KE. A comparison of thioridazine, trifluoperazine, chlorpromazine, and placebo. a double-blind controlled study on the treatment of chronic hospitalized, schizophrenic patients. *Journal of Clinical and Experimental Psychopathology* 1961; **22**: 151–62.
- 57 Schooler NR, Marder SR, Chengappa KN, et al. Clozapine and risperidone in moderately refractory schizophrenia. a 6-month randomized double-blind comparison. *Journal of Clinical Psychiatry* 2016; **77**: 628–34.
- 58 See RE, Fido AA, Maurice M, Ibrahim MM, Salama GM. Risperidone induced increase of plasma norepinephrine is not correlated with symptom improvement in chronic schizophrenia. *Biological Psychiatry* 1999; **45**: 1653–56.
- 59 Shalev A, Hermesh H, Rothberg J, Munitz H. Poor neuroleptic response in acutely exacerbated schizophrenic patients. *Acta Psychiatrica Scandinavica* 1993; **87**: 86–91.
- 60 Shaw P, Sporn A, Gogtay N, et al. Childhood-onset schizophrenia. a double-blind, randomized clozapine-olanzapine comparison. *Archives of General Psychiatry* 2006; **63**: 721–30.
- 61 Sirota P, Pannet I, Koren a, Tchernichovsky E. Quetiapine versus olanzapine for the treatment of negative symptoms in patients with schizophrenia. *Human Psychopharmacology* 2006; **21**: 227–34.
- 62 Smith RC, Infante M, Singh A, Khandat A. The effects of olanzapine on neurocognitive functioning in medication-refractory schizophrenia. *International Journal of Neuropsychopharmacology* 2001; **4**: 239–50.
- 63 Suzuki T, Uchida H, Watanabe K, et al. How effective is it to sequentially switch among olanzapine, quetiapine and risperidone? - A randomized, open-label study of algorithm-based antipsychotic treatment to patients with symptomatic schizophrenia in the real-world clinical setting. *Psychopharmacology* 2007; **195**: 285–95.
- 64 Tollefson GD, Birkett MA, Kiesler GM, Wood AJ, Lilly, Resistant Schizophrenia Study Group. Double-blind comparison of olanzapine versus clozapine in schizophrenic patients clinically eligible for treatment with clozapine. *Biological Psychiatry* 2001; **49**: 52–63.
- 65 Toru M, Shimazono Y, Miyasaka M, Kokubo T, Mori Y, Nasu T. A double-blind comparison of sulpiride with chlorpromazine in chronic schizophrenia. *Journal of Clinical Pharmacology and New Drugs* 1972; **12**: 221–29.
- 66 Volavka J, Czobor P, Sheitman B, et al. Clozapine, olanzapine, risperidone, and haloperidol in the treatment of patients with chronic schizophrenia and schizoaffective disorder. *American Journal of Psychiatry* 2002; **159**: 255–62.
- 67 Wahlbeck K, Cheine M, Tuisku K, Ahokas A, Joffe G, Rimon R. Risperidone versus clozapine in treatment-resistant schizophrenia. a randomized pilot study. *Progress in Neuro-Psychopharmacology and Biological Psychiatry* 2000; **24**: 911–22.
- 68 Wirshing DA, Marshall, B. D., Jr., Green MF, Mintz J, Marder SR, Wirshing WC. Risperidone in treatment-refractory schizophrenia. *American Journal of Psychiatry* 1999; **156**: 1374–79.

- 69 Addington J, Addington D. Neurocognitive functioning in schizophrenia. a trial of risperidone versus haloperidol. *Canadian Journal of Psychiatry [Revue Canadienne de Psychiatrie]* 1997; **42**: 983.
- 70 Byerly M, Weber M. Clozapine versus quetiapine for schizophrenia. *Stanley Foundation Research Programs* 1999.
- 71 Estrella MH, Soria FL, Gonzalez CJC, Butron MAL, Torres JA, Escareño RR. Cost-effectiveness of clozapine vs respiridone for treatment-resistant schizophrenic patients. *Proceedings of the 10th World Congress of Psychiatry; 1996 Aug 23-28; Madrid, Spain* 1996.
- 72 Nct. Clozapine vs olanzapine. an effectiveness study. <https://ClinicalTrials.gov/> 2005.
- 73 Hamilton M, Smith ALG, Lapidus HR, Cadogan EP. A controlled trial of thiopropazate dihydrochloride (dartalan), chlorpromazine and occupational therapy in chronic schizophrenics. *Journal of Mental Science* 1960; **106**: 40–55.
- 74 Heres S, Cordes J, Feyerabend S, et al. Changing the Antipsychotic in Early Nonimprovers to Amisulpride or Olanzapine: Randomized, Double-Blind Trial in Patients With Schizophrenia. *Schizophrenia Bulletin* 2022; **48**: 1273–83. <https://doi.org/10.1093/schbul/sbac068>.
- 75 Heylen S, Gelders Y, Bussche GV. Risperidone versus haloperidol in chronic psychotic patients. an 8 week multicenter double-blind comparative trial. *Psychopharmacology* 1988; **96**: 238.
- 76 Mergl RP, Gallinat J, Riedel M, Schröter A, Tigges P, Hegerl U. Digitised hand movement analysis of EPMS. *Proceedings of the 11th World Congress of Psychiatry; 1999 Aug 6-11; Hamburg, Germany* 1999; **2**: 164.
- 77 Oliemeulen EAP, Jogems-Kosterman BJM, Van, Hoof J. J. M. Is olanzapine a substitute for clozapine? *Schizophrenia Research* 1999; **36**: 146–47.
- 78 Salganik I, Modai I, Bercovici BR, Kutzuk D, Weizman A. Clozapine vs haloperidol therapy in elderly chronic schizophrenic inpatients. preliminary results. A double blind, cross over randomized study. *International Journal of Geriatric Psychopharmacology* 1998; **1**: 185–87.
- 79 Chaimani A, Caldwell DM, Li T, Higgins JPT, Salanti G. Undertaking network meta-analyses, 2019.
- 80 Leucht S, Rothe P, Davis JM, Engel RR. Equipercetile linking of the BPRS and the PANSS. *Eur Neuropsychopharmacol* 2013; **23**: 956–59. <https://doi.org/10.1016/j.euroneuro.2012.11.004>.
- 81 Samara MT, Dold M, Gianatsi M, et al. Efficacy, Acceptability, and Tolerability of Antipsychotics in Treatment-Resistant Schizophrenia: A Network Meta-analysis. *JAMA psychiatry* 2016; **73**: 199–210. <https://doi.org/10.1001/jamapsychiatry.2015.2955>.
- 82 Nikolakopoulou A, Higgins JPT, Papakonstantinou T, et al. CINeMA: An approach for assessing confidence in the results of a network meta-analysis. *PLoS Med* 2020; **17**: e1003082. <https://doi.org/10.1371/journal.pmed.1003082>.
- 83 Chiochia V, Nikolakopoulou A, Higgins JPT, et al. ROB-MEN: a tool to assess risk of bias due to missing evidence in network meta-analysis. *BMC Medicine* 2021; **19**: 304. <https://doi.org/10.1186/s12916-021-02166-3>.
- 84 Schneider-Thoma J, Chalkou K, Dörries C, et al. Comparative efficacy and tolerability of 32 oral and long-acting injectable antipsychotics for the maintenance treatment of adults with schizophrenia: a systematic review and network meta-analysis. *Lancet* 2022; **399**: 824–36. [https://doi.org/10.1016/S0140-6736\(21\)01997-8](https://doi.org/10.1016/S0140-6736(21)01997-8).
- 85 Bighelli I, Rodolico A, García-Mieres H, et al. Psychosocial and psychological interventions for relapse prevention in schizophrenia: a systematic review and network meta-analysis. *Lancet Psychiatry* 2021; **8**: 969–80. [https://doi.org/10.1016/S2215-0366\(21\)00243-1](https://doi.org/10.1016/S2215-0366(21)00243-1).
